# Supplementary material for: Does Innovation-driven Policy Optimize Urban-Energy-Consumption Structure? Evidence from National Innovation-driven City Pilot Policies
Source: Research Square preprint supplement (doi:10.21203/rs.3.rs-5487836/v1), 2024-12-27
Supplement: Supplementary file 1 [file cccd5247c03814a901b2650a.xlsx]

## Sheet: 实验数据
procode	省份	城市	year	地级市	citycode	F	G	I	Ogs	Nes	Des	开始年份	policy	treat	时间	DID	Pgdp	Emp	Wag	Rev	R&D	Fin	CtbNationalRD	Gi	第三产业	Is	guizhi	guizhi2	dumcs	国家自主创新示范新区DID	低碳城市DID	dumdq	dumdj	dumgz
610000	陕西省	地级市	2006	安康市	1	安康	安康2006	安康市2006	2.78264	6.92697	4.4005			0	0	0	6.1	0.12	13.4793	2.78661	0.274562	1.94066	0	1	44.01	216.91	18	5169	0	0	0	1	0	1
610000	陕西省	地级市	2007	安康市	1	安康	安康2007	安康市2007	2.5742	8.00861	4.55743			0	0	0	7.067	0.1185	18.5815	3.10146	0.676125	1.87298	0	2	42.5	216.53	36	5519	0	0	0	1	0	1
610000	陕西省	地级市	2008	安康市	1	安康	安康2008	安康市2008	2.54457	7.91068	4.50311			0	0	0	8.802	0.1235	23.1356	3.20467	0.53974	1.87855	0	2	40.17	212.87	13	4322	0	0	0	1	0	1
610000	陕西省	地级市	2009	安康市	1	安康	安康2009	安康市2009	3.22061	8.30627	5.18736			0	0	0	10.341	0.1227	27.4456	3.53507	0.499935	2.03867	0	3	41.54	217.69	10	6020	0	0	0	1	0	1
610000	陕西省	地级市	2010	安康市	1	安康	安康2010	安康市2010	2.80963	7.94022	4.73856			0	0	0	12.428	0.1287	32.9139	4.04424	0.428332	2.10016	0	1	39.9	219.41	7	6509	0	0	0	1	0	1
610000	陕西省	地级市	2011	安康市	1	安康	安康2011	安康市2011	3.14652	8.28034	5.11979			0	0	0	15.477	0.139	37.8132	4.25866	0.446172	2.02855	0	3	37.34	219.66	15	7381	0	0	0	1	0	1
610000	陕西省	地级市	2012	安康市	1	安康	安康2012	安康市2012	4.97973	6.61023	5.73898			0	0	0	18.878	0.148	41.8454	4.35877	0.377552	1.97635	0	7	34.71	218.42	19	6720	0	0	1	1	0	1
610000	陕西省	地级市	2013	安康市	1	安康	安康2013	安康市2013	6.19859	7.81069	6.95971			0	0	0	19.628	0.172	42.7572	4.19219	0.315209	1.94105	0	8	31.86	216.88	30	6411	0	0	1	1	0	1
610000	陕西省	地级市	2014	安康市	1	安康	安康2014	安康市2014	7.40631	8.32963	7.85494			0	0	0	26.117	0.17626	43.9127	4.07414	0.295991	1.97098	0	9	31.39	217.9	25	6328	0	0	1	1	0	1
610000	陕西省	地级市	2015	安康市	1	安康	安康2015	安康市2015	8.02711	10.2931	9.09291			0	0	0	29.193	0.18054	50.41	3.99238	0.296969	2.0453	0	12	32.32	219.88	27	6237	0	0	1	1	0	1
610000	陕西省	地级市	2016	安康市	1	安康	安康2016	安康市2016	8.71475	9.68745	9.18882			0	0	0	31.77	0.18766	52.195	3.57196	0.50129	2.13488	0	13	34.66	222.8	47	7066	0	0	1	1	0	1
610000	陕西省	地级市	2017	安康市	1	安康	安康2017	安康市2017	4.10554	12.9512	7.33666			0	0	0	36.662	0.19781	58.722	2.87495	0.468643	2.06737	0	24			56	7473	0	0	1	1	0	1
610000	陕西省	地级市	2018	安康市	1	安康	安康2018	安康市2018	3.9198	15.219	7.79458			0	0	0	42.544	0.20174	62.653	2.78661	0.342616	1.93197	0	29	33.84	222.95	45	7254	0	0	1	1	0	1
610000	陕西省	地级市	2019	安康市	1	安康	安康2019	安康市2019	3.76766	15.8829	7.81617			0	0	0	44.241	0.21236	66.688	2.78661	0.351591	2.01967	0	29	41.51	229.88	50	6896	0	0	1	1	0	1
610000	陕西省	地级市	2020	安康市	1	安康	安康2020	安康市2020	10.874	13.989	12.3395			0	0	0	43.378	0.20678	68.251	2.78661	0.425088	2.43746	0	50	45.27	230.85	30	6473	0	0	1	1	0	1
340000	安徽省	地级市	2006	安庆市	2	安庆	安庆2006	安庆市2006	63.2514	0.44566	6.08854			0	0	0	8.709	0.2377	14.7121	4.96514	0.173291	1.63379	0.60062	2	38.63	219.53	9	4892	0	0	0	1	0	0
340000	安徽省	地级市	2007	安庆市	2	安庆	安庆2007	安庆市2007	55.0652	0.47426	5.74061			0	0	0	10.485	0.2419	19.1901	5.47874	0.413714	1.61576	0.742048	8	39.51	220.39	18	5414	0	0	0	1	0	0
340000	安徽省	地级市	2008	安庆市	2	安庆	安庆2008	安庆市2008	50.9031	0.53571	5.79926			0	0	0	12.595	0.2412	22.1089	5.45769	0.883438	1.54736	0.923204	4	38.52	219.49	12	4583	0	0	0	1	0	0
340000	安徽省	地级市	2009	安庆市	2	安庆	安庆2009	安庆市2009	49.4312	0.32162	4.43839			0	0	0	13.811	0.2407	24.0243	5.39217	1.20706	1.79323	1.16042	19	34.59	216.07	19	5802	0	0	0	1	0	0
340000	安徽省	地级市	2010	安庆市	2	安庆	安庆2010	安庆市2010	47.2764	0.39087	4.75067			0	0	0	18.604	0.2424	27.9859	5.11828	1.53338	1.71994	1.4126	19	31.23	215.49	15	4549	0	0	0	1	0	0
340000	安徽省	地级市	2011	安庆市	2	安庆	安庆2011	安庆市2011	45.5343	0.39919	4.69113			0	0	0	22.893	0.2651	33.0932	5.95479	1.61567	1.72088	1.7374	35	29.8	214.92	21	6745	0	0	0	1	0	0
340000	安徽省	地级市	2012	安庆市	2	安庆	安庆2012	安庆市2012	42.4825	0.36965	4.33228			0	0	0	25.592	0.273	38.1958	6.29698	1.83487	1.87702	2.05968	28	29.72	215.29	23	6027	0	0	0	1	0	0
340000	安徽省	地级市	2013	安庆市	2	安庆	安庆2013	安庆市2013	48.2639	0.48178	5.32897			0	0	0	22.801	0.349	39.3302	6.94227	1.99605	2.14565	2.36932	66	32.61	218.36	14	5624	0	0	0	1	0	0
340000	安徽省	地级市	2014	安庆市	2	安庆	安庆2014	安庆市2014	67.9069	0.56471	7.15707			0	0	0	28.808	0.35384	44.2706	6.84145	2.06712	2.26464	2.60313	129	33.49	219.74	17	4684	0	0	0	1	0	0
340000	安徽省	地级市	2015	安庆市	2	安庆	安庆2015	安庆市2015	68.213	0.73056	8.12905			0	0	0	31.101	0.33441	49.802	7.51859	2.12935	2.79463	2.83398	175	36.53	223.43	16	4787	0	0	0	1	0	0
340000	安徽省	地级市	2016	安庆市	2	安庆	安庆2016	安庆市2016	124.844	1.57544	18.1188			0	0	0	33.294	0.34144	52.954	8.35922	2.33649	2.69022	3.13535	276	39.97	227.43	13	5291	0	0	0	1	0	0
340000	安徽省	地级市	2017	安庆市	2	安庆	安庆2017	安庆市2017	10.2549	5.98229	7.84356			0	0	0	36.928	0.33056	58.31	7.08195	2.5688	2.71241	3.52123	178			14	4990	0	0	0	1	0	0
340000	安徽省	地级市	2018	安庆市	2	安庆	安庆2018	安庆市2018	11.1522	7.06149	8.88434			0	0	0	41.088	0.38855	68.286	6.94602	2.5059	2.66904	3.93559	290	39.7	229.27	36	8193	0	0	0	1	0	0
340000	安徽省	地级市	2019	安庆市	2	安庆	安庆2019	安庆市2019	11.3898	7.20493	9.06948			0	0	0	50.574	0.37865	71.841	5.75425	2.44961	2.35318	4.42872	175	45.98	236.86	14	5222	0	0	0	1	0	0
340000	安徽省	地级市	2020	安庆市	2	安庆	安庆2020	安庆市2020	11.3309	8.47461	9.80422			0	0	0	58.684	0.34333	79.459	5.73723	2.41261	2.57863	4.87862	294	47.04	237.3	11	5413	0	0	0	1	0	0
520000	贵州省	地级市	2006	安顺市	3	安顺	安顺2006	安顺市2006	37.7284	18.5197	26.6482			0	0	0	6.1	0.1178	16.0463	8.98921	0.205084	2.32529	0	2	39.9	219.64	0	0	0	0	0	1	0	0
520000	贵州省	地级市	2007	安顺市	3	安顺	安顺2007	安顺市2007	17.2251	29.7812	22.7425			0	0	0	6.1	0.1147	20.1391	10.3257	0.708359	2.2062	0	2	39.94	219.92	0	0	0	0	0	1	0	0
520000	贵州省	地级市	2008	安顺市	3	安顺	安顺2008	安顺市2008	29.7566	30.614	30.1827			0	0	0	6.617	0.108	23.2894	9.61848	0.632147	2.21004	0	3	40.08	218.26	19	7250	0	0	0	1	0	0
520000	贵州省	地级市	2009	安顺市	3	安顺	安顺2009	安顺市2009	3.39113	33.3422	11.0497			0	0	0	7.63	0.117	26.2714	11.6924	0.612913	2.46555	0	3	46.18	227.71	15	6653	0	0	0	1	0	0
520000	贵州省	地级市	2010	安顺市	3	安顺	安顺2010	安顺市2010	3.83431	34.648	11.9756			0	0	0	10.049	0.1278	29.0316	8.5192	0.670569	2.54095	0	9	44.65	227.32	18	5945	0	0	0	1	0	0
520000	贵州省	地级市	2011	安顺市	3	安顺	安顺2011	安顺市2011	2.65355	29.0878	9.10104			0	0	0	12.468	0.1444	35.0375	9.28321	0.720816	2.4395	0	11	45.03	229.49	22	7978	0	0	0	1	0	0
520000	贵州省	地级市	2012	安顺市	3	安顺	安顺2012	安顺市2012	2.79968	44.4633	11.8747			0	0	0	15.454	0.152	39.0664	10.6359	0.670002	2.3634	0	11	46.06	230.98	9	7972	0	0	0	1	0	0
520000	贵州省	地级市	2013	安顺市	3	安顺	安顺2013	安顺市2013	3.87348	33.6273	11.8357			0	0	0	15.006	0.169	45.9363	10.9259	0.687913	2.42557	0	16	47.47	233.26	17	5336	0	0	0	1	0	0
520000	贵州省	地级市	2014	安顺市	3	安顺	安顺2014	安顺市2014	7.21684	48.4885	19.5645			0	0	0	22.569	0.17215	49.1956	11.2448	0.705811	2.26748	0	15	48.42	233.31	20	6567	0	0	0	1	0	0
520000	贵州省	地级市	2015	安顺市	3	安顺	安顺2015	安顺市2015	13.9967	54.8074	28.6042			0	0	0	27.065	0.18304	61.092	11.1709	0.900585	2.33937	0	40	48.72	230.64	24	6327	0	0	0	1	0	0
520000	贵州省	地级市	2016	安顺市	3	安顺	安顺2016	安顺市2016	14.0464	47.992	26.6032			0	0	0	30.216	0.18889	66.742	10.0268	0.874259	2.5363	0	23	49.93	232.24	41	7677	0	0	0	1	0	0
520000	贵州省	地级市	2017	安顺市	3	安顺	安顺2017	安顺市2017	7.99546	49.8443	20.857			0	0	0	34.345	0.2032	69.391	9.50137	1.03001	2.4743	0	30			25	7579	0	0	0	1	0	0
520000	贵州省	地级市	2018	安顺市	3	安顺	安顺2018	安顺市2018	12.4485	45.5754	24.4243			0	0	0	36.164	0.18357	78.328	9.10274	1.2954	2.40029	0	52	50.32	232.76	20	6227	0	0	0	1	0	0
520000	贵州省	地级市	2019	安顺市	3	安顺	安顺2019	安顺市2019	13.4644	44.8533	25.1241			0	0	0	39.177	0.20178	81.854	6.99659	1.46237	2.34434	0	47	51.34	234.33	19	5602	0	0	0	1	0	0
520000	贵州省	地级市	2020	安顺市	3	安顺	安顺2020	安顺市2020	12.4037	49.7826	25.6101			0	0	0	39.161	0.17445	82.795	6.93174	1.88352	2.45516	0	62	51.5	233.3	10	5937	0	0	0	1	0	0
410000	河南省	地级市	2006	安阳市	4	安阳	安阳2006	安阳市2006	13.6744	4.45737	7.8559			0	0	0	11.736	0.4308	15.0394	5.35218	0.236299	1.40345	0	15	26.45	211.3	11	6437	0	0	0	1	0	0
410000	河南省	地级市	2007	安阳市	4	安阳	安阳2007	安阳市2007	11.4232	3.81032	6.63084			0	0	0	15.526	0.436	18.5349	5.25794	1.67443	1.25915	0	13	25.77	211.92	12	5795	0	0	0	1	0	0
410000	河南省	地级市	2008	安阳市	4	安阳	安阳2008	安阳市2008	64.1509	5.90834	21.0229			0	0	0	19.924	0.4243	21.4954	4.83139	1.97744	1.09395	0	26	23.71	209.91	19	5997	0	0	0	1	0	0
410000	河南省	地级市	2009	安阳市	4	安阳	安阳2009	安阳市2009	55.9712	2.72394	13.4467			0	0	0	21.578	0.4304	24.0927	4.90657	1.80841	1.2264	0	37	27.21	214.56	17	5989	0	0	0	1	0	0
410000	河南省	地级市	2010	安阳市	4	安阳	安阳2010	安阳市2010	44.4951	2.82622	11.9333			0	0	0	25.33	0.4346	26.7753	4.94456	1.75694	1.21923	0	50	26.39	214.3	19	6094	0	0	0	1	0	0
410000	河南省	地级市	2011	安阳市	4	安阳	安阳2011	安阳市2011	37.7995	3.03147	11.2351			0	0	0	28.806	0.5016	29.4957	5.20352	1.90508	1.20854	0	72	29.47	217.7	9	5696	0	0	0	1	0	0
410000	河南省	地级市	2012	安阳市	4	安阳	安阳2012	安阳市2012	39.3085	3.79393	12.7915			0	0	0	30.624	0.511	33.9217	5.33348	1.75728	1.30483	0	61	30.55	218.59	12	5285	0	0	0	1	0	0
410000	河南省	地级市	2013	安阳市	4	安阳	安阳2013	安阳市2013	36.0125	2.80629	10.5329			0	0	0	27.968	0.572	34.613	5.47628	1.89934	1.38849	0	95	31.09	219.26	13	5172	0	0	0	1	0	0
410000	河南省	地级市	2014	安阳市	4	安阳	安阳2014	安阳市2014	32.8772	2.55811	9.57011			0	0	0	35.21	0.58893	38.8758	5.76309	1.78845	1.49166	0	80	36.19	224.74	20	5748	0	0	0	1	0	0
410000	河南省	地级市	2015	安阳市	4	安阳	安阳2015	安阳市2015	33.4281	3.13834	10.6604			0	0	0	36.828	0.58951	41.379	5.81823	1.41257	1.59577	0	91	38.59	227.73	18	5885	0	0	0	1	0	0
410000	河南省	地级市	2016	安阳市	4	安阳	安阳2016	安阳市2016	35.0344	2.95876	10.6381			0	0	0	39.603	0.5749	45.734	5.78601	1.43659	1.65398	0	116	41.7	231.25	21	6093	0	0	0	1	0	0
410000	河南省	地级市	2017	安阳市	4	安阳	安阳2017	安阳市2017	28.6387	4.1494	11.2015			0	0	0	43.846	0.52568	51.098	5.75808	1.36482	1.67741	0	135			36	6885	0	0	0	1	0	0
410000	河南省	地级市	2018	安阳市	4	安阳	安阳2018	安阳市2018	28.866	6.34747	13.8097			0	0	0	46.45	0.52568	61.079	6.43701	1.29476	1.74026	0	220	45.7	237.55	31	6885	0	0	0	1	0	0
410000	河南省	地级市	2019	安阳市	4	安阳	安阳2019	安阳市2019	31.7703	7.68666	15.9442			0	0	0	43.003	0.49244	62.727	7.3601	1.17729	2.05855	0	212	46.34	237.48	31	6754	0	0	0	1	0	0
410000	河南省	地级市	2020	安阳市	4	安阳	安阳2020	安阳市2020	28.7056	8.70582	16.0339			0	0	0	42.185	0.4763	67.048	7.60129	1.4243	2.27044	0	227	45.78	235.39	16	5741	0	0	0	1	0	0
210000	辽宁省	地级市	2006	鞍山市	5	鞍山	鞍山2006	鞍山市2006	6.99733	2.98148	4.57712			0	0	0	32.644	0.385	21.1191	4.94401	0.149704	1.36053	1.50155	66	39.83	234.46	11	5760	0	0	0	1	0	0
210000	辽宁省	地级市	2007	鞍山市	5	鞍山	鞍山2007	鞍山市2007	6.40876	2.66744	4.1429			0	0	0	38.387	0.3879	25.3533	5.54511	1.21853	1.3114	1.85512	64	39.65	235.08	13	5746	0	0	0	1	0	0
210000	辽宁省	地级市	2008	鞍山市	5	鞍山	鞍山2008	鞍山市2008	6.83404	2.53887	4.17622			0	0	0	45.83	0.38	29.1205	6.22064	0.967177	1.30426	2.30801	81	40.8	236.25	14	7677	0	0	0	1	0	0
210000	辽宁省	地级市	2009	鞍山市	5	鞍山	鞍山2009	鞍山市2009	6.42213	2.00661	3.60098			0	0	0	49.301	0.3975	30.4326	7.11499	0.891792	1.50982	2.90105	110	42.44	237.67	14	6135	0	0	0	1	0	0
210000	辽宁省	地级市	2010	鞍山市	5	鞍山	鞍山2010	鞍山市2010	5.6598	3.63635	4.53914			0	0	0	58.426	0.4097	32.9163	8.47211	0.971516	1.40319	3.5315	156	41.3	236.92	8	7068	0	0	0	1	0	0
210000	辽宁省	地级市	2011	鞍山市	5	鞍山	鞍山2011	鞍山市2011	5.50008	4.05863	4.72598			0	0	0	68.224	0.52	33.7315	8.63014	0.864015	1.32341	4.3435	170	41.99	237.38	7	4594	0	0	0	1	0	0
210000	辽宁省	地级市	2012	鞍山市	5	鞍山	鞍山2012	鞍山市2012	6.79647	4.64589	5.62206			0	0	0	69.211	0.552	34.5237	9.64858	0.845709	1.46793	5.14921	164	41.65	236.53	17	4201	0	0	1	1	0	0
210000	辽宁省	地级市	2013	鞍山市	5	鞍山	鞍山2013	鞍山市2013	6.04451	7.07343	6.53942			0	0	0	74.95	0.629	40.2606	9.1203	0.781867	1.50183	5.9233	179	41.91	236.88	11	4608	0	0	1	1	0	0
210000	辽宁省	地级市	2014	鞍山市	5	鞍山	鞍山2014	鞍山市2014	7.017	8.44439	7.69894			0	0	0	66.86	0.61298	43.0384	10.1304	1.37895	1.88439	6.50781	180	43.94	238.44	11	5161	0	0	1	1	0	0
210000	辽宁省	地级市	2015	鞍山市	5	鞍山	鞍山2015	鞍山市2015	7.26676	8.90456	8.04574			0	0	0	64.71	0.55961	43.652	5.52308	0.942421	2.1536	7.08494	222	46.97	241.13	10	5343	0	0	1	1	0	0
210000	辽宁省	地级市	2016	鞍山市	5	鞍山	鞍山2016	鞍山市2016	5.17324	11.9698	7.89645			0	0	0	40.532	0.479	48.164	9.09458	0.463063	3.65538	7.83838	204	57.32	250.48	20	5541	0	0	1	1	0	0
210000	辽宁省	地级市	2017	鞍山市	5	鞍山	鞍山2017	鞍山市2017	4.86916	13.2169	8.06275			0	0	0	44.79	0.41794	50.187	8.69239	0.56467	3.53642	8.80307	197			5	5001	0	0	1	1	0	0
210000	辽宁省	地级市	2018	鞍山市	5	鞍山	鞍山2018	鞍山市2018	5.90674	18.0726	10.4167			0	0	0	46.956	0.37244	54.947	8.64842	0.335261	3.47511	9.83896	269	53.19	247.66	12	5538	0	0	1	1	0	0
210000	辽宁省	地级市	2019	鞍山市	5	鞍山	鞍山2019	鞍山市2019	5.26965	20.1015	10.4143			0	0	0	49.123	0.37479	60.962	8.7835	0.377909	3.73244	11.0718	159	51.27	245.3	9	5519	0	0	1	1	0	0
210000	辽宁省	地级市	2020	鞍山市	5	鞍山	鞍山2020	鞍山市2020	4.96135	18.9277	9.79896			0	0	0	52.02	0.35278	70.993	9.04368	0.338702	4.04352	12.1966	278	53.02	246.64	31	7173	0	0	1	1	0	0
150000	内蒙古自治区	地级市	2006	巴彦淖尔市	6	巴彦	巴彦2006	巴彦淖尔市2006	9.43976	0.43198	2.04907			0	0	0	16.045	0.1443	14.822	4.91805	0.441911	1.40971	0.60062	3	29.07	203.06	20	7755	0	0	0	0	0	1
150000	内蒙古自治区	地级市	2007	巴彦淖尔市	6	巴彦	巴彦2007	巴彦淖尔市2007	24.8234	2.26745	7.73175			0	0	0	20.423	0.149	16.5059	5.29172	0.529501	1.23546	0.742048	1	27.49	202.43	23	5979	0	0	0	0	0	1
150000	内蒙古自治区	地级市	2008	巴彦淖尔市	6	巴彦	巴彦2008	巴彦淖尔市2008	9.42954	2.12882	4.50941			0	0	0	25.237	0.1476	20.3665	5.43848	0.537646	1.22235	0.923204	2	26.6	205.5	28	7082	0	0	0	0	0	1
150000	内蒙古自治区	地级市	2009	巴彦淖尔市	6	巴彦	巴彦2009	巴彦淖尔市2009	8.57525	3.59726	5.56872			0	0	0	29.384	0.147	25.8839	5.88357	0.353251	1.32447	1.16042	3	25.62	206.15	8	1920	0	0	0	0	0	1
150000	内蒙古自治区	地级市	2010	巴彦淖尔市	6	巴彦	巴彦2010	巴彦淖尔市2010	6.00586	3.12301	4.33589			0	0	0	35.463	0.1461	30.3245	6.34458	0.690045	1.33532	1.4126	1	23.97	204.24	14	5954	0	0	0	0	0	1
150000	内蒙古自治区	地级市	2011	巴彦淖尔市	6	巴彦	巴彦2011	巴彦淖尔市2011	11.9177	3.40964	6.41544			0	0	0	43.118	0.1479	35.2606	5.94577	0.4177	1.29341	1.7374		23.11	203.85	24	8759	0	0	0	0	0	1
150000	内蒙古自治区	地级市	2012	巴彦淖尔市	6	巴彦	巴彦2012	巴彦淖尔市2012	13.3141	3.20265	6.58618			0	0	0	48.812	0.159	41.539	6.09986	0.389258	1.33933	2.05968	5	22.54	203.95	16	4230	0	0	0	0	0	1
150000	内蒙古自治区	地级市	2013	巴彦淖尔市	6	巴彦	巴彦2013	巴彦淖尔市2013	10.4427	3.53276	6.10142			0	0	0	45.622	0.151	46.8569	6.93906	0.483898	1.47072	2.36932	8	24.33	204.88	10	4400	0	0	0	0	0	1
150000	内蒙古自治区	地级市	2014	巴彦淖尔市	6	巴彦	巴彦2014	巴彦淖尔市2014	13.0404	2.14889	5.35454			0	0	0	51.872	0.1517	47.4866	7.14923	0.310524	1.59493	2.60313	11	25.45	206.03	20	4096	0	0	0	0	0	1
150000	内蒙古自治区	地级市	2015	巴彦淖尔市	6	巴彦	巴彦2015	巴彦淖尔市2015	12.7504	2.98228	6.21869			0	0	0	53	0.14927	51.169	7.41054	0.300754	1.65813	2.83398	7	30.56	211.89	15	5146	0	0	0	0	0	1
150000	内蒙古自治区	地级市	2016	巴彦淖尔市	6	巴彦	巴彦2016	巴彦淖尔市2016	13.3151	2.651	6.00178			0	0	0	54.48	0.14638	54.427	7.64209	0.36396	1.85333	3.13535	17	32.1	214.82	18	5848	0	0	0	0	0	1
150000	内蒙古自治区	地级市	2017	巴彦淖尔市	6	巴彦	巴彦2017	巴彦淖尔市2017	3.93719	12.7036	7.11607			0	0	0	51.336	0.14005	64.696	6.62219	0.312757	2.10803	3.52123	19			31	5762	0	0	0	0	0	1
150000	内蒙古自治区	地级市	2018	巴彦淖尔市	6	巴彦	巴彦2018	巴彦淖尔市2018	3.48681	13.4587	6.90569			0	0	0	48.193	0.15712	65.471	6.8302	0.257399	2.33339	3.93559	44	39.27	216.62	59	8354	0	0	0	0	0	1
150000	内蒙古自治区	地级市	2019	巴彦淖尔市	6	巴彦	巴彦2019	巴彦淖尔市2019	3.38381	13.0626	6.70051			0	0	0	51.722	0.16589	75.879	6.36435	0.207246	2.2551	4.42872	35	44.52	221.55	49	6374	0	0	0	0	0	1
150000	内蒙古自治区	地级市	2020	巴彦淖尔市	6	巴彦	巴彦2020	巴彦淖尔市2020	2.92907	12.5215	6.10649			0	0	0	56.614	0.14364	83.608	6.51138	0.429839	2.33021	4.87862	66	45.31	220.04	36	5250	0	0	0	0	0	1
510000	四川省	地级市	2006	巴中市	7	巴中	巴中2006	巴中市2006	110.678	46.2058	73.7388			0	0	0	6.1	0.1298	13.1222	2.78661	0.198034	1.50617	0.30031		37.35	195.88	5	2697	0	0	0	1	0	0
510000	四川省	地级市	2007	巴中市	7	巴中	巴中2007	巴中市2007	95.9329	52.8025	72.1845			0	0	0	6.1	0.1315	14.6458	2.78661	0.412845	1.49577	0.371024	4	35.62	195.88	12	4845	0	0	0	1	0	0
510000	四川省	地级市	2008	巴中市	7	巴中	巴中2008	巴中市2008	106.054	61.4331	81.7841			0	0	0	6.806	0.1327	17.2109	2.78661	0.422175	1.57731	0.461602	3	34.4	195.88	11	5678	0	0	0	1	0	0
510000	四川省	地级市	2009	巴中市	7	巴中	巴中2009	巴中市2009	125.489	46.5172	79.6906			0	0	0	7.548	0.1368	21.9698	2.78661	0.328576	1.65977	0.580211	4	38.99	207.2	10	5256	0	0	0	1	0	0
510000	四川省	地级市	2010	巴中市	7	巴中	巴中2010	巴中市2010	139.653	42.6264	82.0393			0	0	0	8.618	0.1444	24.7019	2.78661	0.306414	1.72374	0.7063	8	37.13	208.08	11	5412	0	0	0	1	0	0
510000	四川省	地级市	2011	巴中市	7	巴中	巴中2011	巴中市2011	135.334	45.8381	82.9401			0	0	0	10.433	0.1717	28.7859	3.7109	0.300252	1.81748	0.8687	31	34.39	209.26	22	5691	0	0	0	1	0	0
510000	四川省	地级市	2012	巴中市	7	巴中	巴中2012	巴中市2012	188.644	33.8684	91.7048			0	0	0	11.823	0.178	34.2642	5.13811	0.309429	1.97798	1.02984	4	33.29	209.47	3	4597	0	0	0	1	0	0
510000	四川省	地级市	2013	巴中市	7	巴中	巴中2013	巴中市2013	164.56	47.9406	95.7155			0	0	0	10.665	0.265	39.3065	6.57543	0.32855	2.26845	1.18466	13	34.97	215.97	11	5085	0	0	0	1	0	0
510000	四川省	地级市	2014	巴中市	7	巴中	巴中2014	巴中市2014	157.458	63.1259	104.223			0	0	0	13.756	0.28312	42.4667	7.23451	0.310383	2.45763	1.30156	13	36.3	218.64	7	4521	0	0	0	1	0	0
510000	四川省	地级市	2015	巴中市	7	巴中	巴中2015	巴中市2015	207.35	49.7532	119.516			0	0	0	15.076	0.30901	43.825	7.78911	0.331397	2.75172	1.41699	23	36.61	219.86	10	5299	0	0	0	1	0	0
510000	四川省	地级市	2016	巴中市	7	巴中	巴中2016	巴中市2016	199.901	68.2789	121.9			0	0	0	16.415	0.30099	52.213	8.13187	0.329279	3.09973	1.56767	34	36.87	220.36	13	5807	0	0	0	1	0	0
510000	四川省	地级市	2017	巴中市	7	巴中	巴中2017	巴中市2017	152.013	102.899	121.9			0	0	0	18.148	0.32403	55.611	7.5695	0.252342	3.1409	1.76061	27			20	6805	0	0	0	1	0	0
510000	四川省	地级市	2018	巴中市	7	巴中	巴中2018	巴中市2018	143.317	99.4801	120.367			0	0	0	19.458	0.33922	59.637	7.03538	0.156419	3.04082	1.96779	52	35.8	220.59	27	7246	0	0	0	1	0	0
510000	四川省	地级市	2019	巴中市	7	巴中	巴中2019	巴中市2019	153.899	89.2615	119.298			0	0	0	22.716	0.37926	64.949	6.32162	0.205162	2.7884	2.21436	22	51.48	235.11	17	7287	0	0	0	1	0	0
510000	四川省	地级市	2020	巴中市	7	巴中	巴中2020	巴中市2020	125.776	108.819	117.136			0	0	0	27.951	0.51288	73.449	6.31087	0.183681	3.08376	2.43931	42	50.85	229.73	18	7409	0	0	0	1	0	0
220000	吉林省	地级市	2006	白城市	8	白城	白城2006	白城市2006	2.95539	1.4611	2.07936			0	0	0	9.427	0.1752	13.1222	3.54857	0.450765	1.51802	0	2	36.9	211.86	9	4261	0	0	0	1	0	1
220000	吉林省	地级市	2007	白城市	8	白城	白城2007	白城市2007	1.79133	1.00833	1.34434			0	0	0	11.279	0.1766	13.9005	3.65725	0.952987	1.34437	0	4	37.03	214.66	8	3950	0	0	0	1	0	1
220000	吉林省	地级市	2008	白城市	8	白城	白城2008	白城市2008	1.53727	1.70732	1.62008			0	0	0	14.327	0.1775	16.1284	3.75153	0.633502	1.33366	0	3	38.77	216.75	19	5372	0	0	0	1	0	1
220000	吉林省	地级市	2009	白城市	8	白城	白城2009	白城市2009	3.49437	1.82353	2.52599			0	0	0	17.404	0.1799	17.9432	3.57553	0.523177	1.30061	0	1	38.2	218.45	11	4554	0	0	0	1	0	1
220000	吉林省	地级市	2010	白城市	8	白城	白城2010	白城市2010	3.89146	3.97168	3.93137			0	0	0	21.973	0.1851	20.6718	4.04625	0.508305	1.11995	0	7	36	217.26	10	5757	0	0	0	1	0	1
220000	吉林省	地级市	2011	白城市	8	白城	白城2011	白城市2011	6.78154	3.44453	4.83986			0	0	0	27.374	0.1944	24.3363	4.43088	0.466585	1.0418	0	4	33.07	214.9	20	5209	0	0	0	1	0	1
220000	吉林省	地级市	2012	白城市	8	白城	白城2012	白城市2012	7.05633	3.70365	5.11895			0	0	0	30.576	0.208	27.974	5.04121	0.42976	1.15612	0	4	34.75	216.78	7	5302	0	0	0	1	0	1
220000	吉林省	地级市	2013	白城市	8	白城	白城2013	白城市2013	7.39136	5.2814	6.25067			0	0	0	34.791	0.216	29.047	5.33848	0.455467	1.27376	0	3	35.93	219.23	27	5182	0	0	0	1	0	1
220000	吉林省	地级市	2014	白城市	8	白城	白城2014	白城市2014	7.99642	5.0743	6.37516			0	0	0	34.586	0.21592	32.1299	6.03269	0.462935	1.48464	0	5	36.82	220.11	20	4242	0	0	0	1	0	1
220000	吉林省	地级市	2015	白城市	8	白城	白城2015	白城市2015	6.69264	8.13353	7.37927			0	0	0	35.571	0.20768	39.493	5.74274	0.465054	1.7949	0	8	37.58	220.69	36	5203	0	0	0	1	0	1
220000	吉林省	地级市	2016	白城市	8	白城	白城2016	白城市2016	6.30325	12.6903	8.96814			0	0	0	35.892	0.20732	44.619	6.00452	0.422079	2.06191	0	7	39.73	224.06	37	4717	0	0	0	1	0	1
220000	吉林省	地级市	2017	白城市	8	白城	白城2017	白城市2017	4.66659	10.5974	7.05322			0	0	0	33.87	0.20024	49.749	6.3532	0.308559	2.45192	0	14			53	5379	0	0	0	1	0	1
220000	吉林省	地级市	2018	白城市	8	白城	白城2018	白城市2018	2.96405	11.6308	5.91316			0	0	0	31.849	0.18133	52.514	6.77472	0.470364	2.60134	0	22	47.72	228.38	35	5052	0	0	0	1	0	1
220000	吉林省	地级市	2019	白城市	8	白城	白城2019	白城市2019	3.60238	14.8731	7.38962			0	0	0	25.98	0.1549	62.182	8.94051	0.3913	3.33875	0	21	58.33	232.91	31	5384	0	0	0	1	0	1
220000	吉林省	地级市	2020	白城市	8	白城	白城2020	白城市2020	2.14109	12.7394	5.28058			0	0	0	27.23	0.12353	69.606	7.9982	0.287698	3.38448	0	27	55.29	226.84	31	5609	0	0	0	1	0	1
220000	吉林省	地级市	2006	白山市	9	白山	白山2006	白山市2006	0.71116	4.78076	1.84246			0	0	0	14.746	0.1421	13.1222	4.06804	0.158846	1.80976	0.30031	2	31.53	217.04	7	4752	0	0	0	1	0	1
220000	吉林省	地级市	2007	白山市	9	白山	白山2007	白山市2007	1.34242	8.2923	3.36114			0	0	0	18.273	0.1436	17.2495	4.61861	0.499099	1.6586	0.371024	3	31.65	217.73	7	4732	0	0	0	1	0	1
220000	吉林省	地级市	2008	白山市	9	白山	白山2008	白山市2008	1.72454	14.2209	5.02733			0	0	0	23.159	0.1465	20.4572	5.18957	0.520101	1.50782	0.461602	8	32.07	220.25	19	7564	0	0	0	1	0	1
220000	吉林省	地级市	2009	白山市	9	白山	白山2009	白山市2009	1.91534	6.15163	3.44284			0	0	0	27.495	0.164	21.9538	5.54542	0.364578	1.54248	0.580211	3	32.67	221.85	24	5768	0	0	0	1	0	1
220000	吉林省	地级市	2010	白山市	9	白山	白山2010	白山市2010	1.67862	12.3279	4.605			0	0	0	33.524	0.172	26.4169	5.83396	0.520695	1.42233	0.7063	8	29.74	219.57	16	5396	0	0	0	1	0	1
220000	吉林省	地级市	2011	白山市	9	白山	白山2011	白山市2011	1.97532	7.24093	3.79753			0	0	0	41.325	0.1919	29.987	6.68583	0.384599	1.33214	0.8687	13	31.17	222.07	29	6228	0	0	0	1	0	1
220000	吉林省	地级市	2012	白山市	9	白山	白山2012	白山市2012	1.64823	6.02292	3.16151			0	0	0	50.158	0.189	33.3904	6.78522	0.496171	1.23488	1.02984	7	31.28	222.93	26	6070	0	0	0	1	0	1
220000	吉林省	地级市	2013	白山市	9	白山	白山2013	白山市2013	1.71438	7.86127	3.6916			0	0	0	53.043	0.19	35.6012	6.87573	0.8849	1.3342	1.18466	4	31.77	222.99	22	6103	0	0	0	1	0	1
220000	吉林省	地级市	2014	白山市	9	白山	白山2014	白山市2014	1.87381	6.15162	3.40559			0	0	0	53.3	0.18308	39.3399	6.55294	1.05493	1.42833	1.30156	6	32.05	223.18	18	4618	0	0	0	1	0	1
220000	吉林省	地级市	2015	白山市	9	白山	白山2015	白山市2015	1.99942	6.42634	3.59577			0	0	0	53.136	0.17834	44.532	6.70052	0.508163	1.57026	1.41699	5	33.96	224.63	34	4938	0	0	0	1	0	1
220000	吉林省	地级市	2016	白山市	9	白山	白山2016	白山市2016	5.85794	16.9723	10.0423			0	0	0	56.411	0.1702	47.294	6.75044	0.641755	1.85872	1.56767	10	37.15	228.73	36	5374	0	0	0	1	0	1
220000	吉林省	地级市	2017	白山市	9	白山	白山2017	白山市2017	3.35269	8.47381	5.34555			0	0	0	56.221	0.16666	50.23	3.9682	0.41645	1.86136	1.76061	14			61	5601	0	0	0	1	0	1
220000	吉林省	地级市	2018	白山市	9	白山	白山2018	白山市2018	4.1153	11.4096	6.88323			0	0	0	56.031	0.14487	55.846	3.43413	0.268719	1.84064	1.96779	15	46.86	238.83	33	6205	0	0	0	1	0	1
220000	吉林省	地级市	2019	白山市	9	白山	白山2019	白山市2019	5.81847	11.597	8.23446			0	0	0	43.744	0.13864	58.424	4.66601	0.239399	2.57139	2.21436	12	61.52	250.93	35	4932	0	0	0	1	0	1
220000	吉林省	地级市	2020	白山市	9	白山	白山2020	白山市2020	7.8495	11.1111	9.34548			0	0	0	44.021	0.13631	63.022	4.60481	0.223051	2.83241	2.43931	14	61.69	249.12	31	5597	0	0	0	1	0	1
620000	甘肃省	地级市	2006	白银市	10	白银	白银2006	白银市2006	2.45998	29.1242	8.77919			0	0	0	10.066	0.1638	15.4848	3.18405	0.14565	1.41844	0	2	33.27	220.78	12	7306	0	0	0	0	0	0
620000	甘肃省	地级市	2007	白银市	10	白银	白银2007	白银市2007	3.89761	35.7365	12.2805			0	0	0	11.868	0.1559	20.83	3.39206	0.675731	1.32559	0	2	31.56	218.69	1	5558	0	0	0	0	0	0
620000	甘肃省	地级市	2008	白银市	10	白银	白银2008	白银市2008	3.67639	32.2891	11.2851			0	0	0	13.954	0.1458	26.4575	3.48198	0.657199	1.49416	0	1	31.2	218.8	24	6676	0	0	0	0	0	0
620000	甘肃省	地级市	2009	白银市	10	白银	白银2009	白银市2009	4.44446	40.3219	13.9966			0	0	0	15.125	0.151	30.4586	3.74023	0.508817	1.70255	0	7	32.35	219.96	16	7351	0	0	0	0	0	0
620000	甘肃省	地级市	2010	白银市	10	白银	白银2010	白银市2010	3.71478	33.6062	11.5959			0	0	0	17.68	0.1534	34.1096	3.80519	0.410222	1.71952	0	8	32.91	220.81	15	6833	0	0	0	0	0	0
620000	甘肃省	地级市	2011	白银市	10	白银	白银2011	白银市2011	4.10248	29.1907	11.2566			0	0	0	20.66	0.1541	39.8086	4.5547	0.625852	1.64631	0	17	31.39	220.21	25	8300	0	0	0	0	0	0
620000	甘肃省	地级市	2012	白银市	10	白银	白银2012	白银市2012	6.85178	29.6604	14.5385			0	0	0	25.274	0.153	43.9666	5.55397	0.591712	1.71858	0	17	31.49	220.29	22	6789	0	0	0	0	0	0
620000	甘肃省	地级市	2013	白银市	10	白银	白银2013	白银市2013	6.86687	30.226	14.7026			0	0	0	26.175	0.189	44.2076	5.20395	0.562957	1.84316	0	27	33.86	222.35	19	6850	0	0	0	0	0	0
620000	甘肃省	地级市	2014	白银市	10	白银	白银2014	白银市2014	8.24862	30.8022	16.2218			0	0	0	26.174	0.18092	46.6045	5.80765	0.722178	2.20328	0	41	36.97	224.34	15	6798	0	0	0	0	0	0
620000	甘肃省	地级市	2015	白银市	10	白银	白银2015	白银市2015	9.05747	32.2379	17.3873			0	0	0	25.41	0.17918	51.196	5.86974	0.485875	2.63419	0	30	41.68	228.09	25	8603	0	0	0	0	0	0
620000	甘肃省	地级市	2016	白银市	10	白银	白银2016	白银市2016	10.6237	30.6448	18.2723			0	0	0	25.813	0.16024	53.848	6.49447	0.543016	2.86207	0	62	45.71	231.71	12	6715	0	0	0	0	0	0
620000	甘肃省	地级市	2017	白银市	10	白银	白银2017	白银市2017	14.1067	39.8374	24.0823			0	0	0	26.15	0.16873	60.464	6.64656	0.479854	2.94973	0	48			19	7710	0	0	0	0	0	0
620000	甘肃省	地级市	2018	白银市	10	白银	白银2018	白银市2018	11.0282	42.6361	22.2325			0	0	0	29.542	0.15607	66.477	6.07377	0.38451	2.72368	0	85	44.69	231.15	23	7247	0	1	0	0	0	0
620000	甘肃省	地级市	2019	白银市	10	白银	白银2019	白银市2019	13.5772	45.9778	25.5689			0	0	0	27.99	0.15657	74.018	6.4037	0.371892	3.0334	0	48	44.97	227.21	24	7147	0	1	0	0	0	0
620000	甘肃省	地级市	2020	白银市	10	白银	白银2020	白银市2020	13.2205	45.4769	25.0979			0	0	0	32.7	0.16243	75.745	6.71596	0.548462	3.29807	0	67	45.53	225.3	35	7616	0	1	0	0	0	0
450000	广西壮族自治区	地级市	2006	百色市	11	百色	百色2006	百色市2006	9.14361	58.4467	24.3517			0	0	0	7.9	0.1755	16.3105	6.79315	0.140905	1.21971	0	1	27.2	204.57	32	8164	0	0	0	1	0	1
450000	广西壮族自治区	地级市	2007	百色市	11	百色	百色2007	百色市2007	5.8924	62.4085	20.6473			0	0	0	9.781	0.1804	21.4326	7.64631	0.455471	1.31994	0	6	27.48	205.33	36	7281	0	0	0	1	0	1
450000	广西壮族自治区	地级市	2008	百色市	11	百色	百色2008	百色市2008	6.34691	101.836	29.2992			0	0	0	10.037	0.1759	26.026	13.2376	0.446455	1.30209	0	2	26.56	205.4	30	7558	0	0	0	1	0	1
450000	广西壮族自治区	地级市	2009	百色市	11	百色	百色2009	百色市2009	5.23283	80.5874	22.949			0	0	0	12.423	0.1774	27.41	6.30332	0.499006	1.69174	0	7	30.1	210.06	19	7198	0	0	0	1	0	1
450000	广西壮族自治区	地级市	2010	百色市	11	百色	百色2010	百色市2010	3.54546	62.4183	16.2852			0	0	0	15.812	0.1816	29.1749	6.00931	0.486222	1.60187	0	4	27.26	208.66	22	5633	0	0	0	1	0	1
450000	广西壮族自治区	地级市	2011	百色市	11	百色	百色2011	百色市2011	3.01402	49.9477	13.1727			0	0	0	18.867	0.1872	32.3118	6.04314	0.694442	1.56738	0	2	26.38	207.25	30	4350	0	0	0	1	0	1
450000	广西壮族自治区	地级市	2012	百色市	11	百色	百色2012	百色市2012	3.40553	60.16	15.6199			0	0	0	21.539	0.197	35.3782	7.49166	1.1912	1.57824	0	3	27	208.84	27	5148	0	0	0	1	0	1
450000	广西壮族自治区	地级市	2013	百色市	11	百色	百色2013	百色市2013	2.58257	48.1821	11.9789			0	0	0	19.511	0.212	38.2217	8.173	1.05374	1.69143	0	8	27.64	209.08	30	6603	0	0	0	1	0	1
450000	广西壮族自治区	地级市	2014	百色市	11	百色	百色2014	百色市2014	3.98472	65.7908	17.7741			0	0	0	25.806	0.20821	40.9864	7.72515	1.2534	1.69284	0	18	29.33	212.04	28	5596	0	0	0	1	0	1
450000	广西壮族自治区	地级市	2015	百色市	11	百色	百色2015	百色市2015	6.54204	83.3059	25.967			0	0	0	27.363	0.21815	49.809	7.44444	0.786339	1.69303	0	25	30.54	213.27	38	5833	0	0	0	1	0	1
450000	广西壮族自治区	地级市	2016	百色市	11	百色	百色2016	百色市2016	7.92987	80.7446	27.7766			0	0	0	30.881	0.22184	55.364	7.13293	0.720516	1.72918	0	47	30.27	213.91	26	5444	0	0	0	1	0	1
450000	广西壮族自治区	地级市	2017	百色市	11	百色	百色2017	百色市2017	2.02505	83.9427	15.1877			0	0	0	37.479	0.22214	62.528	6.05815	0.855883	1.58478	0	51			27	6367	0	0	0	1	0	1
450000	广西壮族自治区	地级市	2018	百色市	11	百色	百色2018	百色市2018	1.3631	73.9835	11.5667			0	0	0	32.17	0.2221	67.866	7.1996	0.620344	1.94312	0	66	35.53	218.94	24	6564	0	0	0	1	0	1
450000	广西壮族自治区	地级市	2019	百色市	11	百色	百色2019	百色市2019	1.46557	59.9894	10.4502			0	0	0	34.194	0.21518	76.42	7.47302	0.463429	1.99444	0	37	40.08	220.55	18	7242	0	0	0	1	0	1
450000	广西壮族自治区	地级市	2020	百色市	11	百色	百色2020	百色市2020	2.28448	60.5232	12.9826			0	0	0	37.332	0.23025	86.362	7.08067	0.45089	2.13233	0	48	40.7	221.14	11	5930	0	0	0	1	0	1
340000	安徽省	地级市	2006	蚌埠市	12	蚌埠	蚌埠2006	蚌埠市2006	27.0323	1.61474	6.86692			0	0	0	10.231	0.1776	15.9828	4.6886	0.143755	1.70667	0	6	39.7	218.72	8	5544	0	0	0	1	0	0
340000	安徽省	地级市	2007	蚌埠市	12	蚌埠	蚌埠2007	蚌埠市2007	37.8093	1.53227	8.08715			0	0	0	12.818	0.1789	19.7618	5.52069	0.635273	1.66694	0	18	40.75	220.64	6	5785	0	0	0	1	0	0
340000	安徽省	地级市	2008	蚌埠市	12	蚌埠	蚌埠2008	蚌埠市2008	39.5558	1.74605	8.84201			0	0	0	13.632	0.1824	22.3479	5.6548	2.72054	1.60225	0	17	39.8	219.22	26	6733	0	0	0	1	0	0
340000	安徽省	地级市	2009	蚌埠市	12	蚌埠	蚌埠2009	蚌埠市2009	37.627	1.03776	6.67546			0	0	0	14.803	0.1743	25.5122	5.96134	2.70884	1.71665	0	20	35.94	216.32	13	5657	0	0	0	1	0	0
340000	安徽省	地级市	2010	蚌埠市	12	蚌埠	蚌埠2010	蚌埠市2010	40.5825	1.11157	7.21335			0	0	0	17.621	0.1725	28.7069	6.73602	3.24155	1.71862	0	58	33.91	215.07	15	6034	0	0	0	1	0	0
340000	安徽省	地级市	2011	蚌埠市	12	蚌埠	蚌埠2011	蚌埠市2011	46.9577	0.9717	7.37131			0	0	0	24.574	0.2032	33.059	7.86425	3.19128	1.68766	0	102	32.17	213.67	8	7488	0	0	0	1	0	0
340000	安徽省	地级市	2012	蚌埠市	12	蚌埠	蚌埠2012	蚌埠市2012	49.3388	0.93693	7.4632			0	0	0	27.999	0.234	38.4471	8.80861	3.44751	1.80586	0	179	32.16	214.33	13	7173	0	0	0	1	0	0
340000	安徽省	地级市	2013	蚌埠市	12	蚌埠	蚌埠2013	蚌埠市2013	51.2485	1.28548	8.89852			0	0	0	27.462	0.26	42.434	9.21157	3.77986	2.05264	0	179	31.73	214.63	16	7594	0	0	0	1	0	0
340000	安徽省	地级市	2014	蚌埠市	12	蚌埠	蚌埠2014	蚌埠市2014	56.2534	1.57331	10.3844			0	0	0	35.542	0.2729	45.3695	9.15062	3.65583	1.82078	0	174	32.6	217.09	20	7104	0	0	0	1	0	0
340000	安徽省	地级市	2015	蚌埠市	12	蚌埠	蚌埠2015	蚌埠市2015	54.5322	2.13147	11.7774			0	0	0	38.267	0.26936	51.146	9.55106	4.58501	2.24095	0	204	36.99	221.94	28	7837	0	0	0	1	0	0
340000	安徽省	地级市	2016	蚌埠市	12	蚌埠	蚌埠2016	蚌埠市2016	53.5032	3.19426	14.11			0	0	0	41.855	0.27351	56.015	9.66062	4.99242	2.34898	0	225	41.61	227.16	30	8356	0	1	0	1	0	0
340000	安徽省	地级市	2017	蚌埠市	12	蚌埠	蚌埠2017	蚌埠市2017	35.5071	4.67796	13.3553			0	0	0	46.233	0.25738	61.537	9.09726	4.26077	2.26906	0	173			22	7672	0	1	0	1	0	0
340000	安徽省	地级市	2018	蚌埠市	12	蚌埠	蚌埠2018	蚌埠市2018	32.2227	5.7577	13.9858			0	0	0	50.662	0.27606	70.034	8.90279	3.59824	2.28358	0	253	43.42	231.3	25	7633	0	1	0	1	0	0
340000	安徽省	地级市	2019	蚌埠市	12	蚌埠	蚌埠2019	蚌埠市2019	34.6156	5.75369	14.541			0	0	0	60.469	0.27749	75.285	7.93778	4.92535	2.11305	0	197	47.5	236.13	22	8060	0	1	0	1	0	0
340000	安徽省	地级市	2020	蚌埠市	12	蚌埠	蚌埠2020	蚌埠市2020	27.7906	7.23378	14.4123			0	0	0	63.209	0.24963	80.102	7.60826	5.40351	2.30794	0	259	47.67	235.43	26	7662	0	1	0	1	0	0
150000	内蒙古自治区	地级市	2006	包头市	13	包头	包头2006	包头市2006	6.56556	0.64025	2.06623	2010	4	1	0	0	47.902	0.3339	22.8141	6.68579	0.218533	1.32478	0	8	42.32	238.84	25	6798	0	0	0	0	0	1
150000	内蒙古自治区	地级市	2007	包头市	13	包头	包头2007	包头市2007	7.98623	1.58171	3.57597	2010	3	1	0	0	59.719	0.3289	26.8701	6.00906	1.46023	1.2258	0	20	44.99	241.47	17	6743	0	0	0	0	0	1
150000	内蒙古自治区	地级市	2008	包头市	13	包头	包头2008	包头市2008	8.40927	2.83949	4.90445	2010	6	1	0	0	70.004	0.3295	31.7757	5.48185	1.36419	1.04161	0	22	40	237.04	39	8522	0	0	0	0	0	1
150000	内蒙古自治区	地级市	2009	包头市	13	包头	包头2009	包头市2009	9.32481	4.16582	6.24846	2010	-1	1	0	0	84.979	0.3292	36.7258	6.00849	1.39244	1.06522	0	22	43.26	240.69	26	7750	0	0	0	0	0	1
150000	内蒙古自治区	地级市	2010	包头市	13	包头	包头2010	包头市2010	12.4089	5.96111	8.62545	2010	0	1	1	1	94.269	0.3259	41.3983	5.65598	1.42597	1.11463	0	44	43.19	240.49	30	8223	0	0	0	0	0	1
150000	内蒙古自治区	地级市	2011	包头市	13	包头	包头2011	包头市2011	21.147	5.54884	10.9675	2010	1	1	1	1	112.372	0.3862	47.0536	5.38554	1.45484	1.0889	0	48	41.93	239.28	20	7486	0	0	0	0	0	1
150000	内蒙古自治区	地级市	2012	包头市	13	包头	包头2012	包头市2012	13.3831	5.05582	8.26619	2010	2	1	1	1	125.709	0.394	51.6461	5.44812	1.31225	1.02643	0	52	42.07	239.44	20	7486	0	0	0	0	0	1
150000	内蒙古自治区	地级市	2013	包头市	13	包头	包头2013	包头市2013	11.7947	5.65157	8.18701	2010	-3	1	1	1	155.69	0.431	53.0954	6.14093	1.26426	1.12919	0	73	45.52	242.67	30	8413	0	0	0	0	0	1
150000	内蒙古自治区	地级市	2014	包头市	13	包头	包头2014	包头市2014	11.0288	6.24387	8.3122	2010	-4	1	1	1	130.676	0.40843	56.2509	6.44386	1.45743	1.19013	0	131	47.94	245.17	6	2159	0	0	0	0	0	1
150000	内蒙古自治区	地级市	2015	包头市	13	包头	包头2015	包头市2015	11.3551	8.78702	9.99291	2010	-5	1	1	1	132.253	0.40222	59.5	6.7788	1.37232	1.31712	0	124	48.91	246.2	22	6722	0	0	0	0	0	1
150000	内蒙古自治区	地级市	2016	包头市	13	包头	包头2016	包头市2016	15.3164	9.73518	12.2298	2010	-2	1	1	1	136.021	0.3886	63.987	7.01236	1.40854	1.45801	0	139	50.43	247.97	38	8756	0	0	0	0	0	1
150000	内蒙古自治区	地级市	2018	包头市	13	包头	包头2018	包头市2018	12.0438	11.9838	12.0138	2010	8	1	1	1	102.379	0.34691	75.318	4.83602	1.32415	2.29412	0	272	55.82	252.74	35	8556	0	0	0	0	0	1
150000	内蒙古自治区	地级市	2019	包头市	13	包头	包头2019	包头市2019	14.9255	11.8434	13.3012	2010	9	1	1	1	93.835	0.3409	81.889	5.59386	1.17428	2.31785	0	174	57.17	253.66	38	8157	0	0	0	0	0	1
150000	内蒙古自治区	地级市	2020	包头市	13	包头	包头2020	包头市2020	14.3363	12.7581	13.5257	2010	10	1	1	1	102.949	0.34312	86.333	5.20913	1.09618	2.12351	0	269	54.86	251.09	21	6594	0	0	0	0	0	1
150000	内蒙古自治区	地级市	2017	包头市	13	包头	包头2017	包头市2017	12.4054	10.9513	11.657	2010	7	1	1	1	119.2	0.35971	69.706	4.0359	1.18561	2.00809	0	157			24	8081	0	0	0	0	0	1
610000	陕西省	地级市	2017	宝鸡市	14	宝鸡	宝鸡2017	宝鸡市2017	20.3412	7.415	12.3779	2010	7	1	1	1	58.01	0.41198	57.729	3.69964	1.40448	1.83323	3.52123	116			29	7308	0	0	1	1	0	1
610000	陕西省	地级市	2006	宝鸡市	14	宝鸡	宝鸡2006	宝鸡市2006	18.4473	3.87181	8.56534	2010	4	1	0	0	12.69	0.3103	14.9791	3.16021	0.347353	1.64465	0.60062	11	30.9	220.48	0	0	0	0	0	1	0	1
610000	陕西省	地级市	2007	宝鸡市	14	宝鸡	宝鸡2007	宝鸡市2007	17.6327	4.00711	8.50674	2010	3	1	0	0	15.439	0.3145	19.5204	3.36935	1.16254	1.49808	0.742048	9	30.33	219.87	0	0	0	0	0	1	0	1
610000	陕西省	地级市	2008	宝鸡市	14	宝鸡	宝鸡2008	宝鸡市2008	22.4517	5.11789	10.8827	2010	6	1	0	0	18.992	0.3034	22.9525	3.34893	1.03547	1.41403	0.923204	20	28.73	217.78	21	6906	0	0	0	1	0	1
610000	陕西省	地级市	2009	宝鸡市	14	宝鸡	宝鸡2009	宝鸡市2009	27.0227	4.44113	11.2167	2010	-1	1	0	0	21.526	0.3095	26.5369	3.73637	0.881337	1.57581	1.16042	27	28.55	217.99	12	6884	0	0	0	1	0	1
610000	陕西省	地级市	2010	宝鸡市	14	宝鸡	宝鸡2010	宝鸡市2010	28.1697	4.16327	11.1193	2010	0	1	1	1	26.124	0.3165	31.8521	3.97278	0.956151	1.5508	1.4126	39	26.38	215.72	15	6580	0	0	0	1	0	1
610000	陕西省	地级市	2011	宝鸡市	14	宝鸡	宝鸡2011	宝鸡市2011	26.6049	4.06731	10.6596	2010	1	1	1	1	31.579	0.315	35.8336	4.37498	0.783149	1.48046	1.7374	39	25.34	214.41	29	6962	0	0	0	1	0	1
610000	陕西省	地级市	2012	宝鸡市	14	宝鸡	宝鸡2012	宝鸡市2012	28.5426	3.02314	9.59386	2010	2	1	1	1	36.826	0.318	39.9058	4.71842	0.824335	1.51633	2.05968	38	24.39	213.97	22	7224	0	0	1	1	0	1
610000	陕西省	地级市	2013	宝鸡市	14	宝鸡	宝鸡2013	宝鸡市2013	29.5816	3.40743	10.3666	2010	-3	1	1	1	40.049	0.391	45.1256	4.65872	0.89366	1.55612	2.36932	68	23.99	213.81	21	7337	0	0	1	1	0	1
610000	陕西省	地级市	2014	宝鸡市	14	宝鸡	宝鸡2014	宝鸡市2014	24.8901	3.59528	9.68667	2010	-4	1	1	1	43.824	0.4023	45.3338	4.75118	1.02597	1.66407	2.60313	72	26.17	216.35	26	6384	0	0	1	1	0	1
610000	陕西省	地级市	2015	宝鸡市	14	宝鸡	宝鸡2015	宝鸡市2015	25.5101	4.23197	10.6231	2010	-5	1	1	1	47.565	0.41001	49.414	4.72552	0.757363	1.75205	2.83398	114	26.91	217.67	26	5482	0	0	1	1	0	1
610000	陕西省	地级市	2016	宝鸡市	14	宝鸡	宝鸡2016	宝鸡市2016	24.8547	4.13484	10.3585	2010	-2	1	1	1	51.262	0.41131	53.366	3.8902	1.21514	1.83588	3.13535	119	27.62	218.75	28	6538	0	0	1	1	0	1
610000	陕西省	地级市	2018	宝鸡市	14	宝鸡	宝鸡2018	宝鸡市2018	21.6072	8.6958	13.8046	2010	8	1	1	1	59.988	0.40432	62.261	3.87435	2.53773	1.96825	3.93559	174	29.48	222.27	17	6080	0	0	1	1	0	1
610000	陕西省	地级市	2019	宝鸡市	14	宝鸡	宝鸡2019	宝鸡市2019	22.9165	9.01237	14.4836	2010	9	1	1	1	59.05	0.4024	66.984	3.95592	2.33462	2.23703	4.42872	100	34.68	226.64	14	6218	0	0	1	1	0	1
610000	陕西省	地级市	2020	宝鸡市	14	宝鸡	宝鸡2020	宝鸡市2020	23.6803	8.57545	14.3818	2010	10	1	1	1	67.666	0.37927	73.028	3.90542	1.48567	2.3674	4.87862	161	35.62	226.62	15	5394	0	0	1	1	0	1
130000	河北省	地级市	2006	保定市	15	保定	保定2006	保定市2006	5.81038	0.57368	1.83823			0	0	0	11.146	0.6513	14.9775	3.58849	0.118459	1.70775	0.90093	32	33.72	216.38	17	7042	0	0	0	1	0	1
130000	河北省	地级市	2007	保定市	15	保定	保定2007	保定市2007	5.46798	0.28777	1.26463			0	0	0	12.703	0.6558	17.892	3.74382	0.475411	1.67518	1.11307	51	34.65	218.98	23	7780	0	0	0	1	0	1
130000	河北省	地级市	2008	保定市	15	保定	保定2008	保定市2008	4.45335	2.85499	3.56728			0	0	0	14.518	0.6814	21.765	4.21264	0.543726	1.6921	1.38481	92	36.07	220.43	43	7100	0	0	0	1	0	1
130000	河北省	地级市	2009	保定市	15	保定	保定2009	保定市2009	9.03238	1.21815	3.34709			0	0	0	15.77	0.675	24.9677	4.23444	0.449101	1.96572	1.74063	80	34.29	218.96	35	6834	0	0	0	1	0	1
130000	河北省	地级市	2010	保定市	15	保定	保定2010	保定市2010	10.6606	1.8607	4.49402			0	0	0	18.451	0.7044	28.0909	4.4399	0.807276	1.95813	2.1189	159	33.59	218.78	25	7295	0	0	1	1	0	1
130000	河北省	地级市	2011	保定市	15	保定	保定2011	保定市2011	9.07071	2.83083	5.08959			0	0	0	21.796	0.8121	32.2777	5.24875	0.467577	1.87792	2.6061	218	31.36	217.34	31	7324	0	0	1	1	0	1
130000	河北省	地级市	2012	保定市	15	保定	保定2012	保定市2012	10.9832	4.23942	6.85033			0	0	0	24.053	1.01	34.9135	5.87781	0.496595	1.96439	3.08952	281	31.12	217.22	21	5780	0	0	1	1	0	1
130000	河北省	地级市	2013	保定市	15	保定	保定2013	保定市2013	14.8742	4.00547	7.7847			0	0	0	24.951	0.999	39.6787	6.20813	0.533572	2.16571	3.55398	477	31.54	217.43	25	5737	0	0	1	1	0	1
130000	河北省	地级市	2014	保定市	15	保定	保定2014	保定市2014	13.1167	4.50502	7.7299			0	0	0	26.501	1.05701	43.0467	6.34128	0.496291	2.39178	3.90469	429	34.48	220.45	35	5799	0	0	1	1	0	1
130000	河北省	地级市	2015	保定市	15	保定	保定2015	保定市2015	18.0097	4.42805	9.03175			0	0	0	29.067	0.9983	50.477	7.09455	0.392977	2.69509	4.25096	454	38.2	226.42	20	3486	0	0	1	1	0	1
130000	河北省	地级市	2016	保定市	15	保定	保定2016	保定市2016	19.7097	5.18829	10.2296			0	0	0	29.992	1.00598	54.395	6.90512	0.611922	2.6982	4.70303	595	38.61	225.59	40	9404	0	0	1	1	0	1
130000	河北省	地级市	2017	保定市	15	保定	保定2017	保定市2017	10.6858	9.07253	9.84779			0	0	0	29.58	0.74381	63.835	7.49085	0.674098	3.0639	5.28184	639			43	7688	0	0	1	1	0	1
130000	河北省	地级市	2018	保定市	15	保定	保定2018	保定市2018	13.5655	10.0929	11.7085			0	0	0	31.057	0.79703	66.548	7.97708	0.40994	3.42614	5.90338	965	46.27	234.73	21	6896	0	0	1	1	0	1
130000	河北省	地级市	2019	保定市	15	保定	保定2019	保定市2019	13.8805	12.3399	13.089			0	0	0	31.856	0.81757	71.315	8.08237	0.646838	3.74611	6.64308	577	53.3	241.55	21	7629	0	0	1	1	0	1
130000	河北省	地级市	2020	保定市	15	保定	保定2020	保定市2020	12.1749	11.995	12.0846			0	0	0	34.269	0.75159	75.635	8.82326	0.407514	4.1817	7.31793	973	54.15	241.73	23	6336	0	0	1	1	0	1
530000	云南省	地级市	2006	保山市	16	保山	保山2006	保山市2006	15.4067	56.9352	30.5616			0	0	0	6.1	0.1003	16.0531	6.16128	0.254156	1.93991	0.30031		39.66	205.91	5	6840	0	0	0	1	0	0
530000	云南省	地级市	2007	保山市	16	保山	保山2007	保山市2007	13.0143	58.774	28.7761			0	0	0	6.63	0.1546	15.2915	6.51326	0.596536	1.89934	0.371024	3	39.66	207.37	0	0	0	0	0	1	0	0
530000	云南省	地级市	2008	保山市	16	保山	保山2008	保山市2008	14.1316	93.3538	39.4761			0	0	0	7.898	0.1234	19.365	6.41929	0.462401	1.78166	0.461602	1	39.66	207.87	13	6560	0	0	0	1	0	0
530000	云南省	地级市	2009	保山市	16	保山	保山2009	保山市2009	11.6587	69.892	30.2824			0	0	0	8.972	0.1366	21.4076	7.13141	0.544265	2.00003	0.580211		38.83	206.21	7	6208	0	0	0	1	0	0
530000	云南省	地级市	2010	保山市	16	保山	保山2010	保山市2010	12.4353	84.3114	34.9703			0	0	0	10.469	0.1421	22.6946	8.19389	0.542262	2.20639	0.7063	2	38.85	208.57	11	6929	0	0	0	1	0	0
530000	云南省	地级市	2011	保山市	16	保山	保山2011	保山市2011	24.7032	91.0219	49.7771			0	0	0	12.705	0.1594	26.904	8.82125	0.662957	2.14392	0.8687	4	36.88	205.88	21	7956	0	0	0	1	0	0
530000	云南省	地级市	2012	保山市	16	保山	保山2012	保山市2012	22.9893	111.124	54.5691			0	0	0	15.397	0.181	31.0857	9.11622	0.578013	2.0398	1.02984	8	36.7	207.74	30	8320	0	0	1	1	0	0
530000	云南省	地级市	2013	保山市	16	保山	保山2013	保山市2013	29.0273	129.634	66.5659			0	0	0	17.5	0.183	38.9523	9.52446	0.578349	2.063	1.18466	6	36.9	208.32	10	6825	0	0	1	1	0	0
530000	云南省	地级市	2014	保山市	16	保山	保山2014	保山市2014	38.4654	152.344	83.176			0	0	0	19.566	0.18192	41.3104	9.4173	0.469259	2.16701	1.30156	7	37.38	209.74	14	6574	0	0	1	1	0	0
530000	云南省	地级市	2015	保山市	16	保山	保山2015	保山市2015	55.8432	172.355	105.495			0	0	0	21.444	0.18899	47.295	9.46383	0.495234	2.4022	1.41699	18	39.48	213.76	26	7030	0	0	1	1	0	0
530000	云南省	地级市	2016	保山市	16	保山	保山2016	保山市2016	54.3507	172.355	112.476			0	0	0	23.692	0.20035	53.186	9.37517	0.447493	2.5843	1.56767	7	40.44	215.77	21	6648	0	0	1	1	0	0
530000	云南省	地级市	2017	保山市	16	保山	保山2017	保山市2017	15.151	172.355	81.4919			0	0	0	26.058	0.20662	62.176	9.17816	0.352728	2.65509	1.76061	13			20	5794	0	0	1	1	0	0
530000	云南省	地级市	2018	保山市	16	保山	保山2018	保山市2018	26.5825	172.355	93.0579			0	0	0	28.168	0.21663	68.469	8.96235	0.326126	2.51201	1.96779	39	39.09	216.28	13	6233	0	0	1	1	0	0
530000	云南省	地级市	2019	保山市	16	保山	保山2019	保山市2019	25.826	172.355	91.8472			0	0	0	36.548	0.15595	81.222	6.9943	0.260921	2.06869	2.21436	14	40.44	219.05	13	6230	0	0	1	1	0	0
530000	云南省	地级市	2020	保山市	16	保山	保山2020	保山市2020	24.1889	172.355	83.2775			0	0	0	43.2	0.15763	83.733	6.22443	0.259246	2.02966	2.43931	42	39.6	216.52	13	6319	0	0	1	1	0	0
450000	广西壮族自治区	地级市	2006	北海市	17	北海	北海2006	北海市2006	26.1309	51.2814	36.9699			0	0	0	13.252	0.097	15.0958	7.03469	0.13732	1.63149	0	7	34.03	209.06	0	0	0	0	0	1	0	0
450000	广西壮族自治区	地级市	2007	北海市	17	北海	北海2007	北海市2007	51.6952	43.7036	47.5684			0	0	0	15.897	0.097	18.3248	7.71526	0.649931	1.46549	0	7	36.82	213.57	17	7508	0	0	0	1	0	0
450000	广西壮族自治区	地级市	2008	北海市	17	北海	北海2008	北海市2008	56.0814	73.0249	64.1548			0	0	0	20.093	0.1033	21.6582	4.57014	0.815859	1.30471	0	14	34.18	211.34	16	5259	0	0	0	1	0	0
450000	广西壮族自治区	地级市	2009	北海市	17	北海	北海2009	北海市2009	46.4584	59.8935	52.8526			0	0	0	20.093	0.1055	24.7613	5.42087	0.482034	1.77429	0	5	38.4	214.08	13	5807	0	0	0	1	0	0
450000	广西壮族自治区	地级市	2010	北海市	17	北海	北海2010	北海市2010	44.5358	45.4417	44.9869			0	0	0	25.412	0.1189	28.0624	6.91925	0.333455	1.73842	0	8	35.75	213.73	14	7014	0	0	0	1	0	0
450000	广西壮族自治区	地级市	2011	北海市	17	北海	北海2011	北海市2011	33.5904	39.014	36.218			0	0	0	32.103	0.1435	31.0133	7.4635	0.484742	1.56873	0	14	34.99	211.74	20	6079	0	0	0	1	0	0
450000	广西壮族自治区	地级市	2012	北海市	17	北海	北海2012	北海市2012	28.6492	49.5291	37.9211			0	0	0	40.418	0.148	36.3284	6.52055	1.67809	1.43711	0	16	30.55	210.25	15	6335	0	0	0	1	0	0
450000	广西壮族自治区	地级市	2013	北海市	17	北海	北海2013	北海市2013	24.9612	40.2058	31.8155			0	0	0	43.491	0.138	41.0884	5.72942	2.44805	1.42112	0	33	29.73	210.3	17	7416	0	0	0	1	0	0
450000	广西壮族自治区	地级市	2014	北海市	17	北海	北海2014	北海市2014	25.6928	55.9117	38.4217			0	0	0	53.603	0.1441	44.5982	5.51921	2.5405	1.37272	0	24	29.22	211.54	18	6803	0	0	0	1	0	0
450000	广西壮族自治区	地级市	2015	北海市	17	北海	北海2015	北海市2015	31.3139	70.063	47.6811			0	0	0	55.248	0.14684	49.773	5.33735	0.333469	1.38174	0	23	31.67	213.8	14	4847	0	0	0	1	0	0
450000	广西壮族自治区	地级市	2016	北海市	17	北海	北海2016	北海市2016	29.0003	69.6231	45.8574			0	0	0	61.58	0.14534	55.502	4.97388	1.59493	1.34186	0	24	31.37	214.01	28	6532	0	0	0	1	0	0
450000	广西壮族自治区	地级市	2017	北海市	17	北海	北海2017	北海市2017	21.5329	73.3318	41.2023			0	0	0	74.378	0.1439	60.622	5.23125	2.15688	1.29558	0	24			16	7968	0	0	0	1	0	0
450000	广西壮族自治区	地级市	2018	北海市	17	北海	北海2018	北海市2018	17.1855	66.0241	34.9788			0	0	0	72.581	0.13556	69.625	5.90811	2.59818	1.52134	0	64	35.35	218.77	19	7428	0	0	0	1	0	0
450000	广西壮族自治区	地级市	2019	北海市	17	北海	北海2019	北海市2019	14.691	54.2385	29.0857			0	0	0	76.955	0.13827	74.639	6.0026	1.15777	1.59928	0	30	40.84	224.55	15	7547	0	0	0	1	0	0
450000	广西壮族自治区	地级市	2020	北海市	17	北海	北海2020	北海市2020	82.3229	31.7401	52.5261			0	0	0	78.832	0.14593	80.132	6.21879	0.232909	1.75831	0	46	45.73	229.52	10	9212	0	0	0	1	0	0
110000	北京市	直辖市	2006	北京市	18	北京	北京2006	北京市2006	35.4051	1.20344	6.92626	2010	4	1	0	0	50.467	4.574	40.1167	14.1946	1.49007	5.75051	35.1363		68.67	264.94	17	6587	1	0	0	1	1	1
110000	北京市	直辖市	2007	北京市	18	北京	北京2007	北京市2007	34.7256	0.80168	5.61991	2010	3	1	0	0	58.204	4.574	46.5076	15.9584	5.50117	5.49937	43.4098		68.67	264.94	24	6650	1	0	0	1	1	1
110000	北京市	直辖市	2008	北京市	18	北京	北京2008	北京市2008	31.3174	0.14192	0.769705	2010	6	1	0	0	63.029	4.574	56.3279	16.883	5.726	5.70113	54.0074		68.67	264.94	30	7790	1	0	0	1	1	1
110000	北京市	直辖市	2009	北京市	18	北京	北京2009	北京市2009	31.1818	0.1973	2.65271	2010	-1	1	0	0	70.452	4.574	58.1399	16.6774	5.44576	6.34372	67.8847		68.67	264.94	34	7381	1	1	0	1	1	1
110000	北京市	直辖市	2010	北京市	18	北京	北京2010	北京市2010	32.0198	0.676	4.93566	2010	0	1	1	1	75.943	4.574	65.6822	16.6785	6.58427	6.3922	67.8847		68.67	264.94	25	7185	1	1	0	1	1	1
110000	北京市	直辖市	2011	北京市	18	北京	北京2011	北京市2011	32.5877	0.74427	5.22572	2010	1	1	1	1	81.658	4.574	75.8346	16.883	5.64135	6.25619	67.8847		68.67	264.94	35	7909	1	1	0	1	1	1
110000	北京市	直辖市	2012	北京市	18	北京	北京2012	北京市2012	38.704	0.69093	5.56645	2010	2	1	1	1	87.475	4.574	85.306	16.883	5.42545	6.28623	67.8847		68.67	264.94	25	6702	1	1	1	1	1	1
110000	北京市	直辖市	2013	北京市	18	北京	北京2013	北京市2013	41.2698	0.6387	5.56377	2010	-3	1	1	1	93.213	4.574	93.9968	16.883	5.62275	6.25535	67.8847		68.67	264.94	29	7073	1	1	1	1	1	1
110000	北京市	直辖市	2014	北京市	18	北京	北京2014	北京市2014	45.02	0.6821	6.05161	2010	-4	1	1	1	99.995	4.574	103.4	16.883	6.24823	6.23469	67.8847		68.67	264.94	37	6784	1	1	1	1	1	1
110000	北京市	直辖市	2015	北京市	18	北京	北京2015	北京市2015	52.1053	0.55857	6.00491	2010	-5	1	1	1	106.497	4.574	108.091	16.883	5.01587	6.44195	67.8847		68.67	264.94	36	6646	1	1	1	1	1	1
110000	北京市	直辖市	2016	北京市	18	北京	北京2016	北京市2016	55.1536	0.8827	7.76788	2010	-2	1	1	1	118.198	4.574	108.091	16.883	4.46064	6.44195	67.8847		68.67	264.94	45	7649	1	1	1	1	1	1
110000	北京市	直辖市	2018	北京市	18	北京	北京2018	北京市2018	75.2245	1.03747	10.27	2010	8	1	1	1	140.211	4.574	108.091	16.883	5.70298	6.44195	67.8847		68.67	264.94	41	8095	1	1	1	1	1	1
110000	北京市	直辖市	2019	北京市	18	北京	北京2019	北京市2019	76.2267	1.13784	10.8292	2010	9	1	1	1	159.322	4.574	108.091	16.446	5.85046	6.44195	67.8847		68.67	264.94	35	8256	1	1	1	1	1	1
110000	北京市	直辖市	2020	北京市	18	北京	北京2020	北京市2020	74.606	1.32833	11.4897	2010	10	1	1	1	159.322	4.574	108.091	15.1896	5.77505	6.44195	67.8847		68.67	264.94	28	9608	1	1	1	1	1	1
110000	北京市	直辖市	2017	北京市	18	北京	北京2017	北京市2017	65.0136	1.19721	9.98666	2010	7	1	1	1	128.994	4.574	108.091	16.883	5.30419	6.44195	67.8847		68.67	264.94	40	6324	1	1	1	1	1	1
210000	辽宁省	地级市	2006	本溪市	19	本溪	本溪2006	本溪市2006	6.04374	3.65274	4.70202			0	0	0	25.619	0.243	19.2697	6.68515	0.250327	1.76175	0	10	33.25	226.8	13	7298	0	0	0	1	0	0
210000	辽宁省	地级市	2007	本溪市	19	本溪	本溪2007	本溪市2007	4.89683	3.28133	4.01011			0	0	0	31.066	0.2412	22.3108	6.96391	0.969093	1.55315	0	13	32.19	226.23	17	8031	0	0	0	1	0	0
210000	辽宁省	地级市	2008	本溪市	19	本溪	本溪2008	本溪市2008	3.72741	3.43233	3.57688			0	0	0	39.199	0.2395	25.079	6.94709	1.06331	1.42229	0	8	30.94	225.29	25	7553	0	0	0	1	0	0
210000	辽宁省	地级市	2009	本溪市	19	本溪	本溪2009	本溪市2009	3.06565	2.66442	2.8581			0	0	0	44.251	0.2353	28.3857	7.30943	0.972863	1.56279	0	7	34.91	229.32	25	5695	0	0	0	1	0	0
210000	辽宁省	地级市	2010	本溪市	19	本溪	本溪2010	本溪市2010	3.38762	5.00488	4.11921			0	0	0	50.612	0.2321	31.8202	8.67025	0.979855	1.43244	0	21	32.66	227.62	18	5656	0	0	0	1	0	0
210000	辽宁省	地级市	2011	本溪市	19	本溪	本溪2011	本溪市2011	3.35346	5.363	4.2433			0	0	0	60.552	0.2643	35.451	9.80605	1.54356	1.34596	0	37	32.02	226.95	14	4357	0	0	0	1	0	0
210000	辽宁省	地级市	2012	本溪市	19	本溪	本溪2012	本溪市2012	3.38002	6.23254	4.59472			0	0	0	64.459	0.28	38.7642	11.1047	1.35708	1.39061	0	33	33.94	228.53	12	4816	0	0	1	1	0	0
210000	辽宁省	地级市	2013	本溪市	19	本溪	本溪2013	本溪市2013	4.20511	10.0359	6.51643			0	0	0	78.53	0.317	41.2782	10.8658	1.5806	1.38957	0	26	35.1	229.87	19	5301	0	0	1	1	0	0
210000	辽宁省	地级市	2014	本溪市	19	本溪	本溪2014	本溪市2014	5.36082	12.6654	8.27148			0	0	0	67.879	0.32704	41.4261	11.085	1.62788	1.52715	0	18	39.77	234.34	10	4962	0	0	1	1	0	0
210000	辽宁省	地级市	2015	本溪市	19	本溪	本溪2015	本溪市2015	3.43743	13.2778	6.80969			0	0	0	67.656	0.27643	43.822	4.6165	0.927814	1.73853	0	15	42.81	237.04	22	6138	0	0	1	1	0	0
210000	辽宁省	地级市	2016	本溪市	19	本溪	本溪2016	本溪市2016	3.54943	15.2736	7.43801			0	0	0	44.745	0.22766	46.662	7.2455	0.430096	2.77401	0	44	47.7	238.86	20	5929	0	0	1	1	0	0
210000	辽宁省	地级市	2017	本溪市	19	本溪	本溪2017	本溪市2017	5.60579	17.3575	9.94316			0	0	0	46.05	0.21834	50.881	8.30743	0.36376	3.19625	0	42			17	6708	0	0	1	1	0	0
210000	辽宁省	地级市	2018	本溪市	19	本溪	本溪2018	本溪市2018	6.46505	20.1422	11.5181			0	0	0	48.92	0.20077	55.841	7.60987	0.178262	3.36403	0	32	48.46	242.37	17	5824	0	0	1	1	0	0
210000	辽宁省	地级市	2019	本溪市	19	本溪	本溪2019	本溪市2019	7.66495	22.197	13.165			0	0	0	46.673	0.21043	55.701	8.65105	0.13603	3.85165	0	38	45.59	238.96	9	4819	0	0	1	1	0	0
210000	辽宁省	地级市	2020	本溪市	19	本溪	本溪2020	本溪市2020	7.13543	21.8205	12.6011			0	0	0	60.21	0.18526	64.857	8.6002	0.118459	3.90183	0	46	46.05	239.38	22	6283	0	0	1	1	0	0
370000	山东省	地级市	2006	滨州市	20	滨州	滨州2006	滨州市2006	2.94339	0.18673	0.769705			0	0	0	22.398	0.3487	15.0853	5.4124	0.16421	1.11483	0.30031	13	26.59	214.93	19	6288	0	0	0	1	0	1
370000	山东省	地级市	2007	滨州市	20	滨州	滨州2007	滨州市2007	3.65485	0.22672	0.914989			0	0	0	28.125	0.3478	17.8878	5.76253	1.31437	1.07982	0.371024	20	27.41	216.78	16	3680	0	0	0	1	0	1
370000	山东省	地级市	2008	滨州市	20	滨州	滨州2008	滨州市2008	10.6867	1.67949	4.27779			0	0	0	33.61	0.3614	20.7137	5.68928	1.18719	1.08872	0.461602	27	29.14	219.22	21	4561	0	0	0	1	0	1
370000	山东省	地级市	2009	滨州市	20	滨州	滨州2009	滨州市2009	15.3094	0.92549	3.84703			0	0	0	36.679	0.3572	23.847	5.91669	1.07488	1.30278	0.580211	30	33.63	223.6	19	4817	0	0	0	1	0	1
370000	山东省	地级市	2010	滨州市	20	滨州	滨州2010	滨州市2010	16.2348	1.0831	4.28802			0	0	0	41.661	0.3756	28.0048	6.70234	1.48082	1.34153	0.7063	74	35.37	225.35	26	4925	0	0	0	1	0	1
370000	山东省	地级市	2011	滨州市	20	滨州	滨州2011	滨州市2011	19.028	0.97201	4.42518			0	0	0	48.326	0.4163	33.7133	7.19417	1.40586	1.41186	0.8687	154	36.71	226.91	31	5177	0	0	0	1	0	1
370000	山东省	地级市	2012	滨州市	20	滨州	滨州2012	滨州市2012	19.3612	1.3795	5.30418			0	0	0	52.591	0.43	40.466	7.56946	1.75435	1.60625	1.02984	139	37.86	228.31	19	4469	0	0	0	1	0	1
370000	山东省	地级市	2013	滨州市	20	滨州	滨州2013	滨州市2013	16.5023	1.38788	4.88616			0	0	0	56.433	0.524	45.11	7.89015	1.67862	1.64568	1.18466	176	38.9	229.11	15	4079	0	0	0	1	0	1
370000	山东省	地级市	2014	滨州市	20	滨州	滨州2014	滨州市2014	14.3509	1.44538	4.63099			0	0	0	59.557	0.51576	48.4755	8.22002	1.99036	1.71807	1.30156	155	40.43	231.15	13	4571	0	0	0	1	0	1
370000	山东省	地级市	2015	滨州市	20	滨州	滨州2015	滨州市2015	7.32914	2.29887	4.11922			0	0	0	61.189	0.52543	53.865	8.6675	1.70233	1.86951	1.41699	248	41.93	232.69	12	5051	0	0	0	1	0	1
370000	山东省	地级市	2016	滨州市	20	滨州	滨州2016	滨州市2016	7.0678	2.53313	4.24326			0	0	0	63.745	0.50607	58.659	8.90685	1.95283	2.03585	1.56767	308	44.34	234.94	26	5343	0	0	0	1	0	1
370000	山东省	地级市	2017	滨州市	20	滨州	滨州2017	滨州市2017	1.57981	3.77443	2.44477			0	0	0	66.668	0.46897	64.749	8.69941	2.90827	1.99904	1.76061	322			15	2741	0	0	0	1	0	1
370000	山东省	地级市	2018	滨州市	20	滨州	滨州2018	滨州市2018	1.69835	6.49351	3.33372			0	0	0	67.405	0.43145	70.047	9.10955	2.95137	2.0588	1.96779	368	46.26	237.42	13	4316	0	0	0	1	0	1
370000	山东省	地级市	2019	滨州市	20	滨州	滨州2019	滨州市2019	2.30264	10.1066	4.8573			0	0	0	62.639	0.4289	73.518	9.8886	3.46001	2.2774	2.21436	204	48.27	238.92	3	839	0	0	0	1	0	1
370000	山东省	地级市	2020	滨州市	20	滨州	滨州2020	滨州市2020	2.21188	11.2953	5.04219			0	0	0	63.915	0.44845	80.233	10.0795	3.73005	2.50132	2.43931	459	49.56	239.87	12	5773	0	0	0	1	0	1
340000	安徽省	地级市	2006	亳州市	21	亳州	亳州2006	亳州市2006	19.5363	1.73934	5.97079			0	0	0	6.1	0.1467	13.324	2.78661	0.118459	1.20983	0	3	40.19	207.72	7	6871	0	0	0	1	0	0
340000	安徽省	地级市	2007	亳州市	21	亳州	亳州2007	亳州市2007	26.8955	1.70746	7.03652			0	0	0	6.718	0.1563	17.1187	2.95262	0.279901	1.26285	0	2	41.14	211.32	11	4975	0	0	0	1	0	0
340000	安徽省	地级市	2008	亳州市	21	亳州	亳州2008	亳州市2008	31.5351	1.89049	8.07648			0	0	0	7.918	0.1583	20.3235	3.14052	0.206951	1.21898	0	9	40.23	210.78	17	4572	0	0	0	1	0	0
340000	安徽省	地级市	2009	亳州市	21	亳州	亳州2009	亳州市2009	36.6278	1.04812	6.60408			0	0	0	8.477	0.1581	22.9507	4.00958	0.226339	1.47251	0	6	37.51	209.14	11	5680	0	0	0	1	0	0
340000	安徽省	地级市	2010	亳州市	21	亳州	亳州2010	亳州市2010	34.9557	1.17553	6.79775			0	0	0	10.318	0.1607	26.7795	4.54347	0.343813	1.5397	0	19	35.9	209.17	8	5535	0	0	0	1	0	0
340000	安徽省	地级市	2011	亳州市	21	亳州	亳州2011	亳州市2011	37.8722	1.06363	6.78136			0	0	0	12.868	0.1654	31.7569	5.43269	0.625023	1.59771	0	24	34.18	208	11	7418	0	0	0	1	0	0
340000	安徽省	地级市	2012	亳州市	21	亳州	亳州2012	亳州市2012	37.1609	1.05762	6.68879			0	0	0	14.642	0.174	38.4256	6.6635	0.529322	1.73305	0	19	34.33	209.02	13	5669	0	0	0	1	0	0
340000	安徽省	地级市	2013	亳州市	21	亳州	亳州2013	亳州市2013	34.199	1.52263	7.61225			0	0	0	12.498	0.221	52.3958	8.13825	0.732881	1.83192	0	41	34.89	210.24	15	4693	0	0	0	1	0	0
340000	安徽省	地级市	2014	亳州市	21	亳州	亳州2014	亳州市2014	31.1151	2.01845	8.27477			0	0	0	17.769	0.22997	42.1914	8.22701	0.629011	1.92676	0	56	38.53	216.52	20	7345	0	0	0	1	0	0
340000	安徽省	地级市	2015	亳州市	21	亳州	亳州2015	亳州市2015	27.429	2.78586	9.02272			0	0	0	18.771	0.23384	47.338	8.76165	1.02664	2.16751	0	63	40.04	219.35	21	5756	0	0	0	1	0	0
340000	安徽省	地级市	2016	亳州市	21	亳州	亳州2016	亳州市2016	35.624	3.80784	12.1225			0	0	0	20.611	0.23549	50.292	8.31885	0.95948	2.51065	0	61	41.57	221.85	14	8324	0	0	0	1	0	0
340000	安徽省	地级市	2017	亳州市	21	亳州	亳州2017	亳州市2017	12.5651	5.84959	8.60012			0	0	0	22.385	0.23924	57.35	8.22329	1.6508	2.76623	0	68			30	9419	0	0	0	1	0	0
340000	安徽省	地级市	2018	亳州市	21	亳州	亳州2018	亳州市2018	13.8797	6.87787	9.79982			0	0	0	24.547	0.2648	64.547	8.76924	1.51827	2.95614	0	127	44.63	228.16	26	7786	0	0	0	1	0	0
340000	安徽省	地级市	2019	亳州市	21	亳州	亳州2019	亳州市2019	12.4309	7.1329	9.43337			0	0	0	33.314	0.26662	65.672	7.21043	1.54949	2.44604	0	76	50.83	237.21	18	7748	0	0	0	1	0	0
340000	安徽省	地级市	2020	亳州市	21	亳州	亳州2020	亳州市2020	11.6918	8.44533	9.94331			0	0	0	36.156	0.23493	70.775	6.9974	1.4108	2.70325	0	150	50.83	236.64	15	7385	0	0	0	1	0	0
130000	河北省	地级市	2006	沧州市	22	沧州	沧州2006	沧州市2006	8.93739	0.66497	2.46682			0	0	0	18.658	0.4622	16.968	2.90816	0.296909	1.13894	0.30031	22	35.1	223.58	7	6499	0	0	0	1	0	0
130000	河北省	地级市	2007	沧州市	22	沧州	沧州2007	沧州市2007	10.5234	0.33462	1.91023			0	0	0	21.205	0.4551	20.7085	3.22109	0.803577	1.07322	0.371024	36	36.82	225.47	15	7411	0	0	0	1	0	0
130000	河北省	地级市	2008	沧州市	22	沧州	沧州2008	沧州市2008	9.48898	3.65513	5.90923			0	0	0	24.665	0.4617	25.2707	3.30659	0.728379	1.10672	0.461602	24	37.75	226.03	22	9146	0	0	0	1	0	0
130000	河北省	地级市	2009	沧州市	22	沧州	沧州2009	沧州市2009	10.2474	0.98753	3.22006			0	0	0	25.719	0.4323	37.133	3.59383	0.641736	1.3751	0.580211	44	39.75	227.73	20	8158	0	0	0	1	0	0
130000	河北省	地级市	2010	沧州市	22	沧州	沧州2010	沧州市2010	7.00684	2.04164	3.79624			0	0	0	31.091	0.437	33.0147	4.14393	0.554392	1.32592	0.7063	53	37.91	226.44	15	7972	0	0	0	1	0	0
130000	河北省	地级市	2011	沧州市	22	沧州	沧州2011	沧州市2011	7.18076	3.05916	4.697			0	0	0	36.053	0.4858	36.1998	4.50599	0.428408	1.31074	0.8687	49	36	224.56	20	7495	0	0	0	1	0	0
130000	河北省	地级市	2012	沧州市	22	沧州	沧州2012	沧州市2012	6.79911	4.86614	5.75429			0	0	0	38.949	0.524	40.3568	5.06972	0.473948	1.40614	1.02984	54	36.06	224.71	6	6439	0	0	0	1	0	0
130000	河北省	地级市	2013	沧州市	22	沧州	沧州2013	沧州市2013	9.47625	4.57598	6.59946			0	0	0	39.96	0.524	43.4757	5.71791	0.587013	1.55042	1.18466	109	37.34	226.95	11	6254	0	0	0	1	0	0
130000	河北省	地级市	2014	沧州市	22	沧州	沧州2014	沧州市2014	8.65142	5.09039	6.64391			0	0	0	42.676	0.53066	48.0822	6.05449	0.916777	1.68571	1.30156	99	37.89	227.75	11	5657	0	0	0	1	0	0
130000	河北省	地级市	2015	沧州市	22	沧州	沧州2015	沧州市2015	8.22047	5.25051	6.57514			0	0	0	44.819	0.52572	54.779	6.35141	0.38067	1.7937	1.41699	149	40.8	231.18	20	5835	0	0	0	1	0	0
130000	河北省	地级市	2016	沧州市	22	沧州	沧州2016	沧州市2016	7.97113	6.46727	7.18133			0	0	0	47.425	0.51889	58.122	6.21768	0.863105	1.91087	1.56767	197	41.7	232.99	17	6982	0	0	0	1	0	0
130000	河北省	地级市	2017	沧州市	22	沧州	沧州2017	沧州市2017	3.15556	10.1698	5.69302			0	0	0	48.384	0.4349	66.984	6.57452	0.836778	2.04187	1.76061	280			30	6177	0	0	0	1	0	0
130000	河北省	地级市	2018	沧州市	22	沧州	沧州2018	沧州市2018	4.75894	11.72	7.49678			0	0	0	48.562	0.4551	73.826	7.16444	0.926489	2.19844	1.96779	426	49.52	242.02	24	7206	0	0	0	1	0	0
130000	河北省	地级市	2019	沧州市	22	沧州	沧州2019	沧州市2019	4.04915	14.1277	7.6207			0	0	0	47.663	0.47561	79.779	7.90529	0.72012	2.49221	2.21436	271	51.98	243.82	22	7580	0	0	0	1	0	0
130000	河北省	地级市	2020	沧州市	22	沧州	沧州2020	沧州市2020	3.32699	14.4087	6.99073			0	0	0	50.713	0.46967	80.905	7.44296	0.804543	2.71138	2.43931	603	52.73	244.22	30	7494	0	0	0	1	0	0
430000	湖南省	地级市	2006	常德市	23	常德	常德2006	常德市2006	45.3188	33.5358	39.0654			0	0	0	13.338	0.2969	15.9809	4.19832	0.153043	1.00918	0.30031	8	33.62	209.1	6	5025	0	0	0	1	0	0
430000	湖南省	地级市	2007	常德市	23	常德	常德2007	常德市2007	74.6566	23.9348	43.6842			0	0	0	15.901	0.3192	19.6567	4.40496	0.519379	0.94617	0.371024	14	33.73	209.65	0	0	0	0	0	1	0	0
430000	湖南省	地级市	2008	常德市	23	常德	常德2008	常德市2008	90.9043	27.4043	52.0894			0	0	0	19.201	0.3275	23.0427	4.2211	0.517009	0.892033	0.461602	28	32.61	209.82	14	6868	0	0	0	1	0	0
430000	湖南省	地级市	2009	常德市	23	常德	常德2009	常德市2009	64.9156	29.7076	44.6137			0	0	0	22.496	0.3457	25.0523	4.1288	0.629579	0.965401	0.580211	26	36.38	215.61	15	7796	0	0	0	1	0	0
430000	湖南省	地级市	2010	常德市	23	常德	常德2010	常德市2010	77.3434	27.779	47.7071			0	0	0	26.551	0.3681	28.1871	4.69442	0.58302	0.967964	0.7063	41	35.28	216.5	14	9100	0	0	0	1	0	0
430000	湖南省	地级市	2011	常德市	23	常德	常德2011	常德市2011	67.2403	23.9183	41.147			0	0	0	31.644	0.3688	30.8294	5.18413	0.620846	0.938028	0.8687	42	34.63	218.36	19	8998	0	0	0	1	0	0
430000	湖南省	地级市	2012	常德市	23	常德	常德2012	常德市2012	76.9022	31.3418	50.246			0	0	0	35.475	0.396	34.0489	5.23577	0.574939	0.997506	1.02984	44	35.69	220.85	21	9487	0	0	0	1	0	0
430000	湖南省	地级市	2013	常德市	23	常德	常德2013	常德市2013	65.549	27.5393	43.299			0	0	0	37.314	0.424	38.1984	5.40965	0.640926	1.07288	1.18466	84	37.03	222.73	15	9526	0	0	0	1	0	0
430000	湖南省	地级市	2014	常德市	23	常德	常德2014	常德市2014	67.643	32.1618	47.3512			0	0	0	43.215	0.4214	42.8423	5.36623	0.630811	1.13266	1.30156	55	38.91	225.47	21	7475	0	0	0	1	0	0
430000	湖南省	地级市	2015	常德市	23	常德	常德2015	常德市2015	113.835	23.9266	56.378			0	0	0	46.408	0.4136	48.655	5.48703	0.550053	1.22847	1.41699	96	41.21	228.1	19	7367	0	0	0	1	0	0
430000	湖南省	地级市	2016	常德市	23	常德	常德2016	常德市2016	114.09	25.6424	58.1643			0	0	0	50.543	0.41735	55.317	5.32125	0.502411	1.35298	1.56767	104	44.46	231.47	14	7863	0	0	0	1	0	0
430000	湖南省	地级市	2017	常德市	23	常德	常德2017	常德市2017	37.5501	44.927	41.1049			0	0	0	53.038	0.42351	59.399	5.27345	1.11616	1.48406	1.76061	119			17	7864	0	0	0	1	0	0
430000	湖南省	地级市	2018	常德市	23	常德	常德2018	常德市2018	22.8791	42.6027	31.4466			0	0	0	58.16	0.43329	66.335	5.13781	1.50656	1.44002	1.96779	167	51.88	241.63	11	6817	0	0	0	1	0	0
430000	湖南省	地级市	2019	常德市	23	常德	常德2019	常德市2019	22.373	44.6816	31.9054			0	0	0	62.493	0.47268	72.037	5.06415	1.6161	1.48957	2.21436	132	48.72	237.8	14	6794	0	0	0	1	0	0
430000	湖南省	地级市	2020	常德市	23	常德	常德2020	常德市2020	23.3855	50.22	34.6827			0	0	0	70.496	0.44209	73.745	5.00952	1.69543	1.63274	2.43931	216	46.43	234.03	15	7549	0	0	0	1	0	0
320000	江苏省	地级市	2006	常州市	24	常州	常州2006	常州市2006	8.89188	0.58927	2.31729	2010	4	1	0	0	44.44	0.365	26.557	7.57469	0.175791	2.11704	1.50155	72	35.85	232.08	16	5680	0	0	0	1	0	1
320000	江苏省	地级市	2007	常州市	24	常州	常州2007	常州市2007	18.3367	3.104	7.66415	2010	3	1	0	0	52.84	0.3663	30.4128	8.40219	2.9169	2.04858	1.85512	114	36.96	233.59	19	5554	0	0	0	1	0	1
320000	江苏省	地级市	2008	常州市	24	常州	常州2008	常州市2008	20.408	5.53518	10.7518	2010	6	1	0	0	61.503	0.3704	34.8362	8.40915	2.94601	2.12108	2.30801	159	37.98	234.88	31	5485	0	0	0	1	0	1
320000	江苏省	地级市	2009	常州市	24	常州	常州2009	常州市2009	23.7764	4.62516	10.6808	2010	-1	1	0	0	70.138	0.3727	39.2218	8.56725	2.65001	2.49209	2.90105	302	39.62	235.98	16	5161	0	0	0	1	0	1
320000	江苏省	地级市	2010	常州市	24	常州	常州2010	常州市2010	23.4452	4.70124	10.6856	2010	0	1	1	1	67.327	0.3816	44.2114	9.39866	3.09423	2.48355	3.5315	539	41.43	238.17	17	5486	0	0	0	1	0	1
320000	江苏省	地级市	2011	常州市	24	常州	常州2011	常州市2011	22.5944	4.38905	10.1338	2010	1	1	1	1	77.485	0.5012	49.7548	9.79842	3.46309	2.32017	4.3435	801	42.4	239.28	16	5757	0	0	0	1	0	1
320000	江苏省	地级市	2012	常州市	24	常州	常州2012	常州市2012	22.5533	4.58078	10.3365	2010	2	1	1	1	85.039	0.489	55.7612	9.54666	4.83917	2.37733	5.14921	824	43.9	240.72	13	6281	0	0	0	1	0	1
320000	江苏省	地级市	2013	常州市	24	常州	常州2013	常州市2013	21.7223	4.26142	9.78292	2010	-3	1	1	1	119.151	0.715	73.0345	9.37597	5.29118	2.4459	5.9233	1347	45.22	242.05	31	11000	0	0	0	1	0	1
320000	江苏省	地级市	2014	常州市	24	常州	常州2014	常州市2014	23.334	4.76395	10.7274	2010	-4	1	1	1	104.423	0.7174	67.3971	8.85132	4.99033	2.3559	6.50781	1283	48.05	245.23	21	4260	0	1	0	1	0	1
320000	江苏省	地级市	2015	常州市	24	常州	常州2015	常州市2015	23.6847	4.81731	10.8715	2010	-5	1	1	1	112.221	0.69893	70.85	8.84253	4.68753	2.42611	7.08494	1544	49.51	246.73	22	5401	0	1	0	1	0	1
320000	江苏省	地级市	2016	常州市	24	常州	常州2016	常州市2016	26.0667	5.21627	11.8918	2010	-2	1	1	1	122.721	0.685	81.058	8.31835	4.72732	2.52586	7.83838	1684	50.9	248.26	18	5276	0	1	0	1	0	1
320000	江苏省	地级市	2018	常州市	24	常州	常州2018	常州市2018	26.4438	9.09616	15.6815	2010	8	1	1	1	149.277	0.68322	91.268	7.94766	4.26924	2.45834	9.83896	2225	51.5	249.3	20	5927	0	1	1	1	0	1
320000	江苏省	地级市	2019	常州市	24	常州	常州2019	常州市2019	32.0573	10.726	18.8018	2010	9	1	1	1	156.39	0.646	104.539	7.9723	4.08597	2.67131	11.0718	1641	50.19	248.07	24	6592	0	1	1	1	0	1
320000	江苏省	地级市	2020	常州市	24	常州	常州2020	常州市2020	32.0077	12.0802	19.8921	2010	10	1	1	1	147.939	0.67158	108.091	7.90007	3.01063	2.87368	12.1966	2632	51.57	249.47	23	7368	0	1	1	1	0	1
320000	江苏省	地级市	2017	常州市	24	常州	常州2017	常州市2017	24.2846	6.47819	12.719	2010	7	1	1	1	135.999	0.68878	84.744	7.8388	4.54886	2.50098	8.80307	1456			22	6173	0	1	1	1	0	1
210000	辽宁省	地级市	2006	朝阳市	25	朝阳	朝阳2006	朝阳市2006	3.23268	0.60447	1.40152			0	0	0	7.469	0.2188	15.5167	5.86187	0.200202	2.27965	0	5	33.65	208.65	6	5904	0	0	0	1	0	0
210000	辽宁省	地级市	2007	朝阳市	25	朝阳	朝阳2007	朝阳市2007	2.97953	0.57437	1.31125			0	0	0	9.824	0.2171	19.8622	6.52118	0.932009	2.07104	0	7	30.84	206.29	9	6594	0	0	0	1	0	0
210000	辽宁省	地级市	2008	朝阳市	25	朝阳	朝阳2008	朝阳市2008	2.78318	0.58622	1.27992			0	0	0	13.114	0.2188	23.0952	7.11722	0.868593	1.76796	0	14	29.06	206.38	15	6620	0	0	0	1	0	0
210000	辽宁省	地级市	2009	朝阳市	25	朝阳	朝阳2009	朝阳市2009	2.15218	0.42298	0.955707			0	0	0	15.724	0.2303	26.5584	8.13547	0.693881	1.81427	0	7	30.17	210.48	10	7450	0	0	0	1	0	0
210000	辽宁省	地级市	2010	朝阳市	25	朝阳	朝阳2010	朝阳市2010	1.88984	0.75624	1.19624			0	0	0	21.536	0.24	29.9426	10.0929	0.668263	1.73725	0	13	28.65	207.96	13	5230	0	0	0	1	0	0
210000	辽宁省	地级市	2011	朝阳市	25	朝阳	朝阳2011	朝阳市2011	1.94183	1.28569	1.58033			0	0	0	26.927	0.2648	31.4053	10.6914	1.04284	1.72249	0	23	27.76	206.77	9	4843	0	0	0	1	0	0
210000	辽宁省	地级市	2012	朝阳市	25	朝阳	朝阳2012	朝阳市2012	2.10746	1.49081	1.77275			0	0	0	30.765	0.309	36.277	11.6317	0.984095	1.7682	0	32	28.24	205.97	8	4479	0	0	1	1	0	0
210000	辽宁省	地级市	2013	朝阳市	25	朝阳	朝阳2013	朝阳市2013	1.6421	2.78462	2.13917			0	0	0	29.496	0.304	39.0937	11.2168	0.723268	1.87346	0	39	28.37	206.61	20	5276	0	0	1	1	0	0
210000	辽宁省	地级市	2014	朝阳市	25	朝阳	朝阳2014	朝阳市2014	2.16586	4.62729	3.1694			0	0	0	33.379	0.30274	40.5109	10.2365	0.76067	2.08823	0	16	35.82	214.21	17	4888	0	0	1	1	0	0
210000	辽宁省	地级市	2015	朝阳市	25	朝阳	朝阳2015	朝阳市2015	1.71395	6.90143	3.45419			0	0	0	28.852	0.26673	43.95	6.40357	0.265067	2.68135	0	50	43.82	218.01	16	4887	0	0	1	1	0	0
210000	辽宁省	地级市	2016	朝阳市	25	朝阳	朝阳2016	朝阳市2016	1.52914	9.82998	3.91201			0	0	0	24.285	0.2434	47.846	7.12045	0.156342	3.57345	0	52	50.42	225.38	19	4949	0	0	1	1	0	0
210000	辽宁省	地级市	2017	朝阳市	25	朝阳	朝阳2017	朝阳市2017	1.2891	12.0344	3.9926			0	0	0	25.862	0.2309	52.732	7.58925	0.161978	3.6135	0	48			18	5283	0	0	1	1	0	0
210000	辽宁省	地级市	2018	朝阳市	25	朝阳	朝阳2018	朝阳市2018	1.67063	15.9828	5.26248			0	0	0	28.266	0.2184	59.534	8.46936	0.153154	3.56513	0	66	50.39	229.17	16	5995	0	0	1	1	0	0
210000	辽宁省	地级市	2019	朝阳市	25	朝阳	朝阳2019	朝阳市2019	1.98508	18.1508	6.12536			0	0	0	28.761	0.22332	64.331	8.85604	0.133916	3.67605	0	35	47.51	224.46	17	4633	0	0	1	1	0	0
210000	辽宁省	地级市	2020	朝阳市	25	朝阳	朝阳2020	朝阳市2020	1.74301	16.2112	5.41357			0	0	0	30.371	0.22929	67.895	8.87824	0.125743	3.89512	0	109	47.95	223.75	7	5504	0	0	1	1	0	0
440000	广东省	地级市	2006	潮州市	26	潮州	潮州2006	潮州市2006	159.518	6.07466	40.2842			0	0	0	13.061	0.1234	14.4137	3.22639	0.468881	1.55102	0.30031	9	34.29	224.78	20	6572	0	0	0	1	0	0
440000	广东省	地级市	2007	潮州市	26	潮州	潮州2007	潮州市2007	151.383	5.33609	36.5157			0	0	0	15.261	0.1237	17.3872	3.55019	1.04519	1.45675	0.371024	7	35.1	227.58	15	6600	0	0	0	1	0	0
440000	广东省	地级市	2008	潮州市	26	潮州	潮州2008	潮州市2008	156.21	7.66107	43.6832			0	0	0	17.336	0.1196	19.9144	3.61765	1.15067	1.43838	0.461602	10	35.58	227.93	20	5422	0	0	0	1	0	0
440000	广东省	地级市	2009	潮州市	26	潮州	潮州2009	潮州市2009	163.845	5.26501	38.7639			0	0	0	18.681	0.1208	21.2876	3.79975	1.13413	1.55987	0.580211	25	37.64	230.22	16	5368	0	0	0	1	0	0
440000	广东省	地级市	2010	潮州市	26	潮州	潮州2010	潮州市2010	155.309	6.17669	39.6923			0	0	0	21.663	0.1245	24.526	4.15766	0.791899	1.53013	0.7063	20	37.47	230.24	15	6278	0	0	0	1	0	0
440000	广东省	地级市	2011	潮州市	26	潮州	潮州2011	潮州市2011	148.208	5.7339	37.0236			0	0	0	24.169	0.1335	30.9511	4.21367	1.13521	1.47975	0.8687	22	38.37	231.27	22	7179	0	0	0	1	0	0
440000	广东省	地级市	2012	潮州市	26	潮州	潮州2012	潮州市2012	143.564	7.03977	39.4257			0	0	0	26.252	0.131	33.4657	4.519	1.90972	1.55756	1.02984	25	37.99	230.99	15	6312	0	0	1	1	0	0
440000	广东省	地级市	2013	潮州市	26	潮州	潮州2013	潮州市2013	62.1746	15.0856	31.8224			0	0	0	29.226	0.211	38.0807	4.75003	0.669397	1.56694	1.18466	44	37.1	230.06	14	4986	0	0	1	1	0	0
440000	广东省	地级市	2014	潮州市	26	潮州	潮州2014	潮州市2014	75.0066	14.4503	34.8362			0	0	0	31.302	0.20584	43.0979	4.85341	0.513364	1.60135	1.30156	37	38.02	230.87	22	5587	0	0	1	1	0	0
440000	广东省	地级市	2015	潮州市	26	潮州	潮州2015	潮州市2015	81.2832	15.39	37.6253			0	0	0	33.954	0.19789	48.471	5.1854	1.95688	1.58797	1.41699	38	39.73	232.67	5	4830	0	0	1	1	0	0
440000	广东省	地级市	2016	潮州市	26	潮州	潮州2016	潮州市2016	61.0849	19.796	35.7205			0	0	0	36.956	0.2017	53.94	4.54554	1.34788	1.60941	1.56767	55	41.32	234.11	14	5279	0	0	1	1	0	0
440000	广东省	地级市	2017	潮州市	26	潮州	潮州2017	潮州市2017	116.167	10.6039	40.2496			0	0	0	38.241	0.18544	59.54	4.40286	1.00805	1.63382	1.76061	63			21	5951	0	0	1	1	0	0
440000	广东省	地级市	2018	潮州市	26	潮州	潮州2018	潮州市2018	102.494	12.1503	39.2364			0	0	0	40.219	0.17915	67.431	4.43845	0.721633	1.6745	1.96779	91	44.29	237.17	14	6082	0	0	1	1	0	0
440000	广东省	地级市	2019	潮州市	26	潮州	潮州2019	潮州市2019	0.71116	0.14192	0.769705			0	0	0	40.664	0.1643	74.574	4.44142	0.977999	1.79967	2.21436	36	41.96	232.8	13	6187	0	0	1	1	0	0
440000	广东省	地级市	2020	潮州市	26	潮州	潮州2020	潮州市2020	0.71116	37.1846	0.769705			0	0	0	42.605	0.17339	83.437	4.43317	0.448137	1.97917	2.43931	71	42.94	233.19	10	5589	0	0	1	1	0	0
430000	湖南省	地级市	2006	郴州市	27	郴州	郴州2006	郴州市2006	11.9544	44.2274	23.568			0	0	0	12.517	0.2434	17.2116	5.51057	0.215932	1.16227	0	24	35	219.15	0	0	0	0	0	1	0	0
430000	湖南省	地级市	2007	郴州市	27	郴州	郴州2007	郴州市2007	9.45758	41.8075	20.4492			0	0	0	14.861	0.2398	21.1453	5.23496	1.45444	1.16536	0	32	34.15	218.71	19	7235	0	0	0	1	0	0
430000	湖南省	地级市	2008	郴州市	27	郴州	郴州2008	郴州市2008	13.8739	51.946	27.6405			0	0	0	16.668	0.2715	23.7416	5.23631	1.45961	1.22838	0	52	34.8	218.39	14	6869	0	0	0	1	0	0
430000	湖南省	地级市	2009	郴州市	27	郴州	郴州2009	郴州市2009	11.3552	46.4358	23.6323			0	0	0	19.059	0.2799	26.4191	5.79152	1.46634	1.31662	0	20	37.3	224.38	11	5804	0	0	0	1	0	0
430000	湖南省	地级市	2010	郴州市	27	郴州	郴州2010	郴州市2010	10.6022	48.4983	23.445			0	0	0	24.015	0.2895	29.8653	5.79708	1.44452	1.21435	0	54	33.33	221.61	16	5986	0	0	0	1	0	0
430000	湖南省	地级市	2011	郴州市	27	郴州	郴州2011	郴州市2011	9.54086	39.2824	19.8418			0	0	0	29.305	0.3133	34.8259	7.0568	1.35312	1.17049	0	43	31.17	220.03	13	6637	0	0	0	1	0	0
430000	湖南省	地级市	2012	郴州市	27	郴州	郴州2012	郴州市2012	14.6899	52.2188	28.4728			0	0	0	32.848	0.341	37.9465	7.88761	1.40841	1.23264	0	47	31.72	221.37	9	7077	0	0	0	1	0	0
430000	湖南省	地级市	2013	郴州市	27	郴州	郴州2013	郴州市2013	12.5772	43.0802	23.795			0	0	0	32.92	0.361	40.795	8.6941	1.31685	1.28938	0	78	32.64	222.69	22	6874	0	0	0	1	0	0
430000	湖南省	地级市	2014	郴州市	27	郴州	郴州2014	郴州市2014	14.2568	49.8954	27.3734			0	0	0	39.999	0.36536	40.795	12.8367	1.26859	1.31409	0	55	33.67	224.12	12	5983	0	0	0	1	0	0
430000	湖南省	地级市	2015	郴州市	27	郴州	郴州2015	郴州市2015	24.638	50.6548	35.7161			0	0	0	42.682	0.35916	49.086	10.9474	1.20921	1.43371	0	79	35.58	225.81	30	5544	0	0	0	1	0	0
430000	湖南省	地级市	2016	郴州市	27	郴州	郴州2016	郴州市2016	24.6112	53.9534	36.931			0	0	0	46.691	0.35918	55.56	10.6864	1.21987	1.56724	0	127	38.13	228.32	28	6388	0	0	0	1	0	0
430000	湖南省	地级市	2017	郴州市	27	郴州	郴州2017	郴州市2017	9.0266	56.2113	23.6613			0	0	0	46.134	0.36313	60.82	9.3369	1.09689	1.71523	0	155			25	7149	0	0	1	1	0	0
430000	湖南省	地级市	2018	郴州市	27	郴州	郴州2018	郴州市2018	10.1185	47.2162	22.5931			0	0	0	50.482	0.35467	65.367	5.58731	1.87448	1.58599	0	179	46.52	238.06	25	7199	0	0	1	1	0	0
430000	湖南省	地级市	2019	郴州市	27	郴州	郴州2019	郴州市2019	9.62468	49.4647	22.6551			0	0	0	50.76	0.37334	67.178	5.82093	2.06651	1.71552	0	166	51.84	242.01	28	7239	0	0	1	1	0	0
430000	湖南省	地级市	2020	郴州市	27	郴州	郴州2020	郴州市2020	11.7134	54.9922	26.3775			0	0	0	53.581	0.38415	74.129	5.73007	2.66349	1.87064	0	140	50.02	238.67	21	6888	0	0	1	1	0	0
510000	四川省	副省级市	2006	成都市	28	成都	成都2006	成都市2006	207.35	16.5997	81.6817	2010	4	1	0	0	25.171	1.3925	22.5634	6.79047	0.279967	3.31459	6.60682	213	48.85	241.74	8	5910	0	0	0	1	1	0
510000	四川省	副省级市	2007	成都市	28	成都	成都2007	成都市2007	207.35	14.2865	82.8171	2010	3	1	0	0	26.525	1.4638	26.6067	8.61501	1.73938	3.16243	8.16253	387	47.68	240.61	19	5543	0	0	0	1	1	0
510000	四川省	副省级市	2008	成都市	28	成都	成都2008	成都市2008	207.35	17.3554	91.7707	2010	6	1	0	0	30.855	1.5557	30.8099	9.09242	1.67924	3.5188	10.1552	415	46.51	239.6	15	7295	0	0	0	1	1	0
510000	四川省	副省级市	2009	成都市	28	成都	成都2009	成都市2009	155.802	36.2842	82.4454	2010	-1	1	0	0	35.215	1.6461	34.1952	8.60308	1.54161	4.94943	12.7646	585	49.59	243.64	12	6270	0	0	0	1	1	0
510000	四川省	副省级市	2010	成都市	28	成都	成都2010	成都市2010	154.716	37.6514	83.3037	2010	0	1	1	1	48.51	1.7205	38.6031	9.49213	1.37606	4.93875	15.5386	1115	50.17	245.03	16	6954	0	0	0	1	1	0
510000	四川省	副省级市	2011	成都市	28	成都	成都2011	成都市2011	150.121	40.6516	84.2652	2010	1	1	1	1	48.755	1.9892	42.3632	9.93048	1.71366	4.50281	19.1114	1392	49.36	244.58	16	7547	0	0	0	1	1	0
510000	四川省	副省级市	2012	成都市	28	成都	成都2012	成都市2012	147.639	47.4635	88.8819	2010	2	1	1	1	57.624	2.123	48.3023	9.59455	1.93996	4.42128	22.6565	1440	49.46	245.2	19	7263	0	0	0	1	1	0
510000	四川省	副省级市	2013	成都市	28	成都	成都2013	成都市2013	150.416	53.5656	94.5804	2010	-3	1	1	1	76.674	4.574	58.5434	9.86442	1.77316	4.53181	26.0625	2415	50.22	246.36	28	8393	0	0	0	1	1	0
510000	四川省	副省级市	2014	成都市	28	成都	成都2014	成都市2014	188.613	49.7384	106.423	2010	-4	1	1	1	70.019	2.72764	63.2014	10.194	1.89246	4.63143	28.6344	1948	51.62	248.07	28	6754	0	0	0	1	1	0
510000	四川省	副省级市	2015	成都市	28	成都	成都2015	成都市2015	196.465	60.6889	118.249	2010	-5	1	1	1	74.273	4.574	69.123	10.7177	2.65707	4.76297	31.1737	2779	52.81	249.34	20	6932	0	1	0	1	1	0
510000	四川省	副省级市	2016	成都市	28	成都	成都2016	成都市2016	207.35	63.0681	121.9	2010	-2	1	1	1	76.96	4.574	74.408	9.65808	2.8952	4.63779	34.4888	3649	53.11	249.21	10	6858	0	1	0	1	1	0
510000	四川省	副省级市	2018	成都市	28	成都	成都2018	成都市2018	182.071	76.8564	121.9	2010	8	1	1	1	94.782	4.574	88.011	9.28225	3.97679	4.43721	43.2914	3649	54.12	250.71	35	8548	0	1	1	1	1	0
510000	四川省	副省级市	2019	成都市	28	成都	成都2019	成都市2019	176.561	76.51	121.184	2010	9	1	1	1	103.386	4.574	97.519	8.71663	5.27023	4.33341	48.7159	3649	65.57	261.97	17	6182	0	1	1	1	1	0
510000	四川省	副省级市	2020	成都市	28	成都	成都2020	成都市2020	183.532	74.4356	121.9	2010	10	1	1	1	85.679	4.574	104.463	8.58147	5.07704	4.6256	53.6648	3649	65.72	262.04	16	7375	0	1	1	1	1	0
510000	四川省	副省级市	2017	成都市	28	成都	成都2017	成都市2017	191.034	79.6269	121.9	2010	7	1	1	1	86.911	4.574	79.292	9.18351	3.03169	4.52018	38.7335	3649			19	6996	0	1	1	1	1	0
130000	河北省	地级市	2006	承德市	29	承德	承德2006	承德市2006	4.15563	0.83669	1.87054			0	0	0	12.688	0.2377	14.9784	5.71254	0.197327	1.72088	0.90093	6	29.79	212.03	6	3856	0	0	0	1	0	1
130000	河北省	地级市	2007	承德市	29	承德	承德2007	承德市2007	4.37666	0.45361	1.4161			0	0	0	16.377	0.2418	18.9628	5.90231	0.928763	1.65432	1.11307	12	27.1	210.52	11	4542	0	0	0	1	0	1
130000	河北省	地级市	2008	承德市	29	承德	承德2008	承德市2008	4.57972	4.44045	4.50956			0	0	0	21.048	0.2483	24.2093	5.28669	0.810826	1.56283	1.38481	10	24.83	209.83	25	6655	0	0	0	1	0	1
130000	河北省	地级市	2009	承德市	29	承德	承德2009	承德市2009	4.47488	1.13847	2.2633			0	0	0	22.198	0.2542	26.7251	5.9437	0.73377	1.96758	1.74063	7	33.48	218.57	25	6528	0	0	0	1	0	1
130000	河北省	地级市	2010	承德市	29	承德	承德2010	承德市2010	5.24573	2.08379	3.31211			0	0	0	25.699	0.2572	29.9649	6.16848	0.663736	2.08538	2.1189	13	33.28	217.6	26	7968	0	0	0	1	0	1
130000	河北省	地级市	2011	承德市	29	承德	承德2011	承德市2011	5.36101	2.80218	3.87985			0	0	0	31.705	0.2544	34.1369	6.43907	0.712213	1.85371	2.6061	18	30.18	215.19	14	6522	0	0	0	1	0	1
130000	河北省	地级市	2012	承德市	29	承德	承德2012	承德市2012	5.96538	3.68919	4.69437			0	0	0	33.791	0.264	34.6058	6.98128	0.66604	1.97167	3.08952	20	31.42	215.75	20	3471	0	0	0	1	0	1
130000	河北省	地级市	2013	承德市	29	承德	承德2013	承德市2013	7.53027	3.62492	5.23377			0	0	0	33.653	0.303	42.3231	8.05763	0.818325	2.13039	3.55398	19	32.38	215.84	21	3885	0	0	0	1	0	1
130000	河北省	地级市	2014	承德市	29	承德	承德2014	承德市2014	9.18884	3.82905	5.94864			0	0	0	38.128	0.2992	44.5127	8.01166	0.655079	2.27363	3.90469	23	33.2	216.37	38	6836	0	0	0	1	0	1
130000	河北省	地级市	2015	承德市	29	承德	承德2015	承德市2015	7.32647	3.84891	5.31758			0	0	0	38.505	0.29937	49.071	7.1585	0.532105	2.52359	4.25096	29	35.82	218.48	31	5235	0	0	0	1	0	1
130000	河北省	地级市	2016	承德市	29	承德	承德2016	承德市2016	7.22875	4.44191	5.67126			0	0	0	40.741	0.29625	53.449	5.70934	0.792848	2.68815	4.70303	58	37.68	221.15	59	8695	0	0	0	1	0	1
130000	河北省	地级市	2017	承德市	29	承德	承德2017	承德市2017	3.62038	8.78188	5.65434			0	0	0	41.299	0.26601	60.27	6.08831	0.634111	3.01726	5.28184	97			49	9131	0	0	0	1	0	1
130000	河北省	地级市	2018	承德市	29	承德	承德2018	承德市2018	3.2253	10.3366	5.80287			0	0	0	41.476	0.26692	65.558	7.0572	0.673921	3.29103	5.90338	141	45.68	227.63	51	7218	0	0	0	1	0	1
130000	河北省	地级市	2019	承德市	29	承德	承德2019	承德市2019	4.28115	12.7318	7.42402			0	0	0	41.08	0.27092	69.365	7.64567	0.442602	3.65583	6.64308	90	46.53	226.27	30	7569	0	0	0	1	0	1
130000	河北省	地级市	2020	承德市	29	承德	承德2020	承德市2020	3.3145	13.7555	6.81217			0	0	0	46.119	0.2736	73.929	7.49268	0.609512	3.81268	7.31793	150	46.19	224.51	36	7409	0	0	0	1	0	1
340000	安徽省	地级市	2006	池州市	30	池州	池州2006	池州市2006	7.00841	1.96921	3.72931			0	0	0	10.007	0.0674	16.1451	11.8434	0.118459	1.96027	0	2	40	218.07	20	5423	0	0	0	1	0	0
340000	安徽省	地级市	2007	池州市	30	池州	池州2007	池州市2007	4.50729	2.13137	3.10286			0	0	0	10.949	0.07	18.4676	8.07928	0.471877	1.84671	0	2	40.98	219.6	15	5662	0	0	0	1	0	0
340000	安徽省	地级市	2008	池州市	30	池州	池州2008	池州市2008	5.30327	2.45063	3.60992			0	0	0	14.147	0.0725	23.411	9.25166	0.613752	1.81552	0		38.8	218.43	13	6130	0	0	0	1	0	0
340000	安徽省	地级市	2009	池州市	30	池州	池州2009	池州市2009	7.38082	1.40172	3.23538			0	0	0	17.295	0.0719	27.5964	9.81218	1.02357	1.86084	0	5	40.85	224.18	11	6492	0	0	0	1	0	0
340000	安徽省	地级市	2010	池州市	30	池州	池州2010	池州市2010	8.26951	1.53233	3.58358			0	0	0	21.437	0.071	31.2935	10.373	1.49988	2.03879	0	15	38.2	223.01	8	6301	0	0	0	1	0	0
340000	安徽省	地级市	2011	池州市	30	池州	池州2011	池州市2011	8.37406	1.41292	3.46475			0	0	0	26.345	0.0806	37.5012	11.0046	1.152	2.01583	0	33	35.34	220.21	29	7889	0	0	0	1	0	0
340000	安徽省	地级市	2012	池州市	30	池州	池州2012	池州市2012	9.62616	1.38053	3.67935			0	0	0	29.471	0.078	38.0394	12.5464	1.25388	2.12492	0	55	36.19	221.3	19	5694	0	0	1	1	0	0
340000	安徽省	地级市	2013	池州市	30	池州	池州2013	池州市2013	9.04266	1.94164	4.2174			0	0	0	28.534	0.107	41.9993	14.0919	1.3688	2.15558	0	42	36.62	222.04	12	3686	0	0	1	1	0	0
340000	安徽省	地级市	2014	池州市	30	池州	池州2014	池州市2014	10.3954	2.45261	5.08395			0	0	0	36.267	0.10893	46.1785	13.2328	1.22998	2.18578	0	50	39.6	226.34	12	5424	0	0	1	1	0	0
340000	安徽省	地级市	2015	池州市	30	池州	池州2015	池州市2015	15.9743	3.05926	7.07884			0	0	0	38.014	0.10716	49.733	16.883	1.2924	2.25193	0	83	40.91	227.97	21	5892	0	0	1	1	0	0
340000	安徽省	地级市	2016	池州市	30	池州	池州2016	池州市2016	16.0158	4.61396	8.66959			0	0	0	40.919	0.10736	55.068	12.1308	1.19807	2.34433	0	105	44.15	232.07	27	7208	0	0	1	1	0	0
340000	安徽省	地级市	2017	池州市	30	池州	池州2017	池州市2017	6.19808	5.99289	6.09465			0	0	0	43.178	0.10501	62.289	10.4411	0.89075	2.41946	0	98			19	6509	0	0	1	1	0	0
340000	安徽省	地级市	2018	池州市	30	池州	池州2018	池州市2018	5.65786	7.18109	6.37556			0	0	0	46.865	0.11335	70.72	9.41592	1.67114	2.36267	0	132	46.77	235.83	35	7274	0	0	1	1	0	0
340000	安徽省	地级市	2019	池州市	30	池州	池州2019	池州市2019	7.22599	7.23378	7.22989			0	0	0	56.217	0.10912	79.614	7.64273	1.48242	2.13357	0	120	45.73	235.57	21	5813	0	0	1	1	0	0
340000	安徽省	地级市	2020	池州市	30	池州	池州2020	池州市2020	6.91938	8.54898	7.69278			0	0	0	64.843	0.10878	84.912	7.69934	1.5152	2.39996	0	123	45.8	235.67	16	6548	0	0	1	1	0	0
150000	内蒙古自治区	地级市	2006	赤峰市	31	赤峰	赤峰2006	赤峰市2006	1.51827	0.2967	0.769705			0	0	0	9.751	0.2997	14.9851	3.82632	0.144466	1.42905	0	9	35.71	212.61	8	5351	0	0	0	1	0	0
150000	内蒙古自治区	地级市	2007	赤峰市	31	赤峰	赤峰2007	赤峰市2007	1.20798	0.69655	0.91745			0	0	0	13.471	0.3145	18.2632	4.77559	0.420385	1.31317	0	29	31.96	211.38	10	5583	0	0	0	1	0	0
150000	内蒙古自治区	地级市	2008	赤峰市	31	赤峰	赤峰2008	赤峰市2008	1.21357	1.30841	1.2601			0	0	0	17.242	0.3078	22.1046	4.81548	0.372178	1.19193	0	11	31.05	211.97	4	1833	0	0	0	1	0	0
150000	内蒙古自治区	地级市	2009	赤峰市	31	赤峰	赤峰2009	赤峰市2009	1.69223	2.97154	2.24344			0	0	0	21.037	0.3007	27.4117	5.01946	0.371261	1.22244	0	25	34.24	217.94	9	6391	0	0	0	1	0	0
150000	内蒙古自治区	地级市	2010	赤峰市	31	赤峰	赤峰2010	赤峰市2010	1.76918	4.38785	2.79026			0	0	0	25.059	0.305	31.3228	5.18544	0.362718	1.23855	0	12	32.43	216.1	18	6584	0	0	0	1	0	0
150000	内蒙古自治区	地级市	2011	赤峰市	31	赤峰	赤峰2011	赤峰市2011	1.82075	3.76261	2.61967			0	0	0	31.121	0.3081	38.3185	4.58556	0.291595	1.18925	0	31	30.72	215.06	20	7317	0	0	0	1	0	0
150000	内蒙古自治区	地级市	2012	赤峰市	31	赤峰	赤峰2012	赤峰市2012	2.71012	4.32776	3.42633			0	0	0	36.36	0.321	45.5944	4.75085	0.356794	1.19181	0	30	29.5	214.38	16	5701	0	0	0	1	0	0
150000	内蒙古自治区	地级市	2013	赤峰市	31	赤峰	赤峰2013	赤峰市2013	1.98729	4.28347	2.92078			0	0	0	36.34	0.365	51.2746	5.40782	0.372255	1.26226	0	33	33.43	217.73	21	7653	0	0	0	1	0	0
150000	内蒙古自治区	地级市	2014	赤峰市	31	赤峰	赤峰2014	赤峰市2014	2.12729	4.3243	3.03591			0	0	0	41.309	0.35662	54.3788	5.51211	0.488675	1.35773	0	24	36.23	220.8	19	6077	0	0	0	1	0	0
150000	内蒙古自治区	地级市	2015	赤峰市	31	赤峰	赤峰2015	赤峰市2015	3.07172	4.54424	3.73746			0	0	0	43.269	0.33948	55.377	5.61861	0.345465	1.428	0	41	37.7	222.82	13	5336	0	0	0	1	0	0
150000	内蒙古自治区	地级市	2016	赤峰市	31	赤峰	赤峰2016	赤峰市2016	2.87641	5.00857	3.79839			0	0	0	44.936	0.33495	59.602	5.78177	0.317285	1.66767	0	65	37.88	222.76	24	7086	0	0	0	1	0	0
150000	内蒙古自治区	地级市	2017	赤峰市	31	赤峰	赤峰2017	赤峰市2017	2.25665	8.31826	4.35321			0	0	0	40.378	0.31402	63.809	5.78089	0.263824	2.19102	0	50			2	1627	0	0	0	1	0	0
150000	内蒙古自治区	地级市	2018	赤峰市	31	赤峰	赤峰2018	赤峰市2018	2.10421	8.86874	4.34505			0	0	0	35.819	0.29686	72.254	6.98367	0.374056	2.69636	0	96	49.5	229.76	14	7607	0	0	0	1	0	0
150000	内蒙古自治区	地级市	2019	赤峰市	31	赤峰	赤峰2019	赤峰市2019	2.17557	9.19596	4.49992			0	0	0	39.488	0.31316	77.181	6.46361	0.324583	2.59345	0	70	51.31	232.4	9	6287	0	0	0	1	0	0
150000	内蒙古自治区	地级市	2020	赤峰市	31	赤峰	赤峰2020	赤峰市2020	2.15036	9.70116	4.59833			0	0	0	43.595	0.30248	79.912	6.70335	0.255875	2.70041	0	100	49.18	229.57	24	5691	0	0	0	1	0	0
450000	广西壮族自治区	地级市	2006	崇左市	32	崇左	崇左2006	崇左市2006	19.1975	54.1211	32.9189			0	0	0	8.366	0.1292	18.6853	4.38648	0.17788	1.0593	0	2	31.44	197.21	0	0	0	0	0	1	0	0
450000	广西壮族自治区	地级市	2007	崇左市	32	崇左	崇左2007	崇左市2007	20.0979	56.0636	34.2937			0	0	0	10.826	0.1303	17.4963	5.30559	0.574629	1.04503	0		33.43	200.55	7	4201	0	0	0	1	0	0
450000	广西壮族自治区	地级市	2008	崇左市	32	崇左	崇左2008	崇左市2008	25.3016	90.149	50.0206			0	0	0	12.226	0.1328	20.585	6.33386	0.630303	1.07794	0	1	33.88	203.39	0	0	0	0	0	1	0	0
450000	广西壮族自治区	地级市	2009	崇左市	32	崇左	崇左2009	崇左市2009	18.5597	73.4339	38.5399			0	0	0	13.921	0.1366	22.44	6.83195	0.568263	1.19588	0		36.15	207.59	17	4670	0	0	0	1	0	0
450000	广西壮族自治区	地级市	2010	崇左市	32	崇左	崇左2010	崇左市2010	13.2266	58.0396	28.7844			0	0	0	18.583	0.1397	24.1821	6.66706	0.553234	1.20855	0	1	32.73	203.46	9	5199	0	0	0	1	0	0
450000	广西壮族自治区	地级市	2011	崇左市	32	崇左	崇左2011	崇左市2011	9.44866	47.4671	21.9419			0	0	0	24.557	0.1444	27.599	6.14641	0.743633	1.16496	0	1	30.39	200.93	28	11775	0	0	0	1	0	0
450000	广西壮族自治区	地级市	2012	崇左市	32	崇左	崇左2012	崇左市2012	8.15294	58.0417	22.9938			0	0	0	26.288	0.142	29.9671	7.44387	0.890392	1.27615	0	2	32.16	205.23	27	8914	0	0	0	1	0	0
450000	广西壮族自治区	地级市	2013	崇左市	32	崇左	崇左2013	崇左市2013	7.49712	46.3315	19.4085			0	0	0	23.669	0.137	34.9721	8.12233	0.961665	1.36084	0	4	31.98	206.42	15	7856	0	0	0	1	0	0
450000	广西壮族自治区	地级市	2014	崇左市	32	崇左	崇左2014	崇左市2014	9.83499	63.0133	26.3292			0	0	0	31.944	0.13604	39.5594	7.44841	1.07545	1.38099	0	10	34.61	211.91	16	6791	0	0	0	1	0	0
450000	广西壮族自治区	地级市	2015	崇左市	32	崇左	崇左2015	崇左市2015	11.8754	80.326	33.2371			0	0	0	33.355	0.13695	47.63	7.33957	0.909281	1.43498	0	13	37.05	214.33	10	5751	0	0	0	1	0	0
450000	广西壮族自治区	地级市	2016	崇左市	32	崇左	崇左2016	崇左市2016	38.0529	65.1853	50.2214			0	0	0	37.161	0.135	53.954	5.31935	0.498398	1.42223	0	32	37.56	215.67	17	6759	0	0	0	1	0	0
450000	广西壮族自治区	地级市	2017	崇左市	32	崇左	崇左2017	崇左市2017	2.12595	83.8854	15.5303			0	0	0	43.678	0.13722	59.25	3.75282	0.498035	1.35976	0	46			11	6139	0	0	0	1	0	0
450000	广西壮族自治区	地级市	2018	崇左市	32	崇左	崇左2018	崇左市2018	2.1642	73.5654	14.3408			0	0	0	48.564	0.13313	65.824	3.05472	0.374002	1.30743	0	52	37.13	218.49	15	6662	0	0	0	1	0	0
450000	广西壮族自治区	地级市	2019	崇左市	32	崇左	崇左2019	崇左市2019	2.05764	59.7227	12.2512			0	0	0	36.129	0.13241	70.65	4.43904	0.27308	1.98527	0	17	49.55	227.28	22	7991	0	0	0	1	0	0
450000	广西壮族自治区	地级市	2020	崇左市	32	崇左	崇左2020	崇左市2020	2.91124	60.2391	14.5183			0	0	0	38.732	0.13044	78.189	4.18006	0.206142	2.22257	0	42	48.95	226.7	16	8252	0	0	0	1	0	0
340000	安徽省	地级市	2006	滁州市	33	滁州	滁州2006	滁州市2006	24.4013	1.2975	5.83408			0	0	0	8.503	0.1951	14.0725	4.24763	0.282943	1.50055	0	2	35.02	208.69	11	7229	0	0	0	1	0	0
340000	安徽省	地级市	2007	滁州市	33	滁州	滁州2007	滁州市2007	31.2159	1.32672	6.76128			0	0	0	10.611	0.1916	17.7516	5.09096	0.729792	1.45956	0	14	34.72	210.7	16	6683	0	0	0	1	0	0
340000	安徽省	地级市	2008	滁州市	33	滁州	滁州2008	滁州市2008	36.0564	1.47909	7.73594			0	0	0	11.626	0.1835	21.4858	5.50588	0.807244	1.43231	0	7	33.42	209.69	17	8758	0	0	0	1	0	0
340000	安徽省	地级市	2009	滁州市	33	滁州	滁州2009	滁州市2009	42.8788	0.72042	6.03589			0	0	0	14.002	0.1828	24.2767	6.43292	0.689575	1.72752	0	13	31.17	207.84	10	6432	0	0	0	1	0	0
340000	安徽省	地级市	2010	滁州市	33	滁州	滁州2010	滁州市2010	43.3432	0.83784	6.53784			0	0	0	17.4	0.1785	28.5337	7.26344	1.03741	1.79716	0	16	29.5	208.16	17	9517	0	0	0	1	0	0
340000	安徽省	地级市	2011	滁州市	33	滁州	滁州2011	滁州市2011	51.9548	0.69411	6.66162			0	0	0	21.634	0.188	34.8777	8.68423	0.950737	1.75294	0	69	27.93	207.55	7	4131	0	0	0	1	0	0
340000	安徽省	地级市	2012	滁州市	33	滁州	滁州2012	滁州市2012	45.5865	0.7881	6.54118			0	0	0	24.651	0.192	41.8302	9.98638	1.37161	1.87459	0	107	27.85	207.99	27	10222	0	0	0	1	0	0
340000	安徽省	地级市	2013	滁州市	33	滁州	滁州2013	滁州市2013	47.7396	1.05887	7.76138			0	0	0	24.19	0.225	45.198	10.5348	1.38536	2.00469	0	160	27.84	208.69	7	6453	0	0	0	1	0	0
340000	安徽省	地级市	2014	滁州市	33	滁州	滁州2014	滁州市2014	48.79	1.31993	8.74714			0	0	0	30.562	0.22954	50.7954	10.1803	1.73649	2.02543	0	146	28.75	211.12	14	6641	0	0	0	1	0	0
340000	安徽省	地级市	2015	滁州市	33	滁州	滁州2015	滁州市2015	44.5639	1.86296	9.78104			0	0	0	32.634	0.23749	56.336	11.0079	2.05713	2.19697	0	232	29.81	212.84	25	8067	0	0	0	1	0	0
340000	安徽省	地级市	2016	滁州市	33	滁州	滁州2016	滁州市2016	44.2629	2.61851	11.4704			0	0	0	35.301	0.24468	61.436	11.7587	2.31363	2.39192	0	336	34.44	218.59	24	8092	0	0	0	1	0	0
340000	安徽省	地级市	2017	滁州市	33	滁州	滁州2017	滁州市2017	13.5222	5.52863	8.68392			0	0	0	39.517	0.2387	67.264	11.3757	2.77471	2.47537	0	269			23	7390	0	0	0	1	0	0
340000	安徽省	地级市	2018	滁州市	33	滁州	滁州2018	滁州市2018	13.6374	6.58169	9.50375			0	0	0	43.999	0.31341	73.608	11.0602	2.68926	2.55418	0	353	36.13	223.88	32	8939	0	0	0	1	0	0
340000	安徽省	地级市	2019	滁州市	33	滁州	滁州2019	滁州市2019	12.694	6.77405	9.29414			0	0	0	70.429	0.33383	76.413	7.3773	3.08675	1.7931	0	299	42.35	233.78	18	6829	0	0	0	1	0	0
340000	安徽省	地级市	2020	滁州市	33	滁州	滁州2020	滁州市2020	18.1518	7.54707	11.7704			0	0	0	76.087	0.31644	83.281	7.4545	3.28429	2.02759	0	431	42.28	233.31	11	6372	0	0	0	1	0	0
510000	四川省	地级市	2006	达州市	34	达州	达州2006	达州市2006	79.6229	58.847	68.6896			0	0	0	7.052	0.252	14.0969	2.86375	0.184475	1.55193	0	3	31.21	199.78	2	4348	0	0	0	1	0	0
510000	四川省	地级市	2007	达州市	34	达州	达州2007	达州市2007	78.3899	60.375	68.9745			0	0	0	8.97	0.2537	17.0292	3.10176	0.578213	1.40912	0	7	28.84	196.79	18	6161	0	0	0	1	0	0
510000	四川省	地级市	2008	达州市	34	达州	达州2008	达州市2008	91.5202	68.367	79.3914			0	0	0	10.58	0.2497	20.5595	3.32718	0.515819	1.41424	0	6	28.69	198.06	15	6485	0	0	0	1	0	0
510000	四川省	地级市	2009	达州市	34	达州	达州2009	达州市2009	72.7527	69.4951	71.1111			0	0	0	11.915	0.2499	22.7689	3.42944	0.49215	1.55704	0	6	28.64	202.53	18	6490	0	0	0	1	0	0
510000	四川省	地级市	2010	达州市	34	达州	达州2010	达州市2010	74.6029	70.2436	72.4009			0	0	0	14.623	0.2527	26.5229	3.73441	0.48518	1.54361	0	9	26.2	202.4	10	4384	0	0	0	1	0	0
510000	四川省	地级市	2011	达州市	34	达州	达州2011	达州市2011	64.0033	78.2394	70.876			0	0	0	18.474	0.2578	31.7635	4.06731	0.476903	1.52062	0	19	24.39	201.39	22	5693	0	0	0	1	0	0
510000	四川省	地级市	2012	达州市	34	达州	达州2012	达州市2012	65.3433	86.8466	75.5838			0	0	0	20.685	0.268	36.332	4.5828	0.519236	1.62846	0	17	24.77	202.84	18	5354	0	0	0	1	0	0
510000	四川省	地级市	2013	达州市	34	达州	达州2013	达州市2013	82.1842	87.6249	84.8769			0	0	0	18.102	0.34	39.4971	4.84247	0.540864	1.80151	0	23	25.46	204.06	11	4293	0	0	0	1	0	0
510000	四川省	地级市	2014	达州市	34	达州	达州2014	达州市2014	85.2373	103.384	94.047			0	0	0	24.411	0.31978	43.3881	5.37248	0.505427	1.89496	0	29	27.06	206.47	11	4726	0	0	0	1	0	0
510000	四川省	地级市	2015	达州市	34	达州	达州2015	达州市2015	110.886	108.663	109.772			0	0	0	24.342	0.34498	48.672	5.86001	0.495724	2.23262	0	55	29.79	208.26	13	4888	0	0	0	1	0	0
510000	四川省	地级市	2016	达州市	34	达州	达州2016	达州市2016	134.196	106.103	119.722			0	0	0	25.921	0.37613	53.081	5.85025	0.465032	2.55867	0	61	37.03	215.61	12	5314	0	0	0	1	0	0
510000	四川省	地级市	2017	达州市	34	达州	达州2017	达州市2017	207.35	62.2282	121.9			0	0	0	28.066	0.48423	50.756	5.72672	0.418573	2.57558	0	73			18	6110	0	0	0	1	0	0
510000	四川省	地级市	2018	达州市	34	达州	达州2018	达州市2018	207.35	64.0961	121.9			0	0	0	29.627	0.52807	57.94	5.97717	0.368134	2.62103	0	74	44.97	225.67	23	6331	0	0	0	1	0	0
510000	四川省	地级市	2019	达州市	34	达州	达州2019	达州市2019	77.3957	141.048	106.556			0	0	0	35.625	0.53256	61.582	5.26954	0.408854	2.39977	0	37	48.5	231.57	22	7093	0	0	0	1	0	0
510000	四川省	地级市	2020	达州市	34	达州	达州2020	达州市2020	82.5881	139.436	108.962			0	0	0	38.068	0.51478	34.4035	5.30613	0.506955	2.58344	0	114	47.38	228.82	30	6575	0	0	0	1	0	0
210000	辽宁省	副省级市	2006	大连市	35	大连	大连2006	大连市2006	10.8133	1.63558	4.24799	2010	4	1	0	0	42.579	0.9227	24.2272	7.63272	0.198143	2.70438	0.90093	167	44.05	235.93	5	6217	0	0	0	1	1	0
210000	辽宁省	副省级市	2007	大连市	35	大连	大连2007	大连市2007	10.8787	1.50735	4.09294	2010	3	1	0	0	51.63	0.9077	28.2705	8.55967	3.4519	2.3722	1.11307	215	42.99	235.03	11	6526	0	0	0	1	1	0
210000	辽宁省	副省级市	2008	大连市	35	大连	大连2008	大连市2008	10.0703	1.54609	3.98261	2010	6	1	0	0	63.198	0.9501	34.3044	8.78816	3.56855	2.33642	1.38481	286	40.83	233.34	16	7583	0	0	0	1	1	0
210000	辽宁省	副省级市	2009	大连市	35	大连	大连2009	大连市2009	8.6965	1.26707	3.34713	2010	-1	1	0	0	70.781	0.9397	38.7654	9.20183	3.93043	2.70584	1.74063	420	43.89	236.7	19	7242	0	0	0	1	1	0
210000	辽宁省	副省级市	2010	大连市	35	大连	大连2010	大连市2010	8.67214	2.50652	4.68381	2010	0	1	1	1	77.704	0.942	44.615	9.70951	4.35068	2.84259	2.1189	597	42.43	235.74	21	5295	0	0	0	1	1	0
210000	辽宁省	副省级市	2011	大连市	35	大连	大连2011	大连市2011	8.39637	2.8315	4.89379	2010	1	1	1	1	91.295	1.098	49.7279	10.5863	4.51264	2.64339	2.6061	741	41.47	235.04	26	5451	0	0	0	1	1	0
210000	辽宁省	副省级市	2012	大连市	35	大连	大连2012	大连市2012	8.13457	3.39141	5.26572	2010	2	1	1	1	102.922	1.115	54.8212	10.7115	4.40954	2.63461	3.08952	672	41.65	235.2	26	5408	0	0	1	1	1	0
210000	辽宁省	副省级市	2013	大连市	35	大连	大连2013	大连市2013	7.99414	5.60857	6.69944	2010	-3	1	1	1	129.455	1.314	59.0627	11.1121	4.26904	2.69126	3.55398	784	42.89	236.65	26	5650	0	0	1	1	1	0
210000	辽宁省	副省级市	2014	大连市	35	大连	大连2014	大连市2014	8.05709	6.61792	7.30341	2010	-4	1	1	1	109.939	1.21287	63.6094	10.1999	4.34843	2.81366	3.90469	703	45.93	240.16	19	3973	0	0	1	1	1	0
210000	辽宁省	副省级市	2015	大连市	35	大连	大连2015	大连市2015	7.95933	7.06681	7.5003	2010	-5	1	1	1	110.682	1.13684	69.39	7.50052	2.00758	3.10863	4.25096	811	50.83	244.97	17	6245	0	0	1	1	1	0
210000	辽宁省	副省级市	2016	大连市	35	大连	大连2016	大连市2016	7.48518	8.00325	7.74005	2010	-2	1	1	1	97.47	1.07754	73.764	8.98511	2.3611	3.69802	4.70303	933	51.36	244.58	16	6881	0	1	1	1	1	0
210000	辽宁省	副省级市	2018	大连市	35	大连	大连2018	大连市2018	17.3839	11.0039	13.8554	2010	8	1	1	1	109.55	0.98629	87.592	9.18025	3.56092	3.23806	5.90338	1299	51.96	246.19	16	7363	0	1	1	1	1	0
210000	辽宁省	地级市	2019	大连市	35	大连	大连2019	大连市2019	20.26	15.1863	17.5562	2010	9	1	1	1	99.996	0.99902	95.442	9.89488	2.7054	3.73626	6.64308	1134	53.46	246.91	21	8236	0	1	1	1	0	0
210000	辽宁省	地级市	2020	大连市	35	大连	大连2020	大连市2020	14.1358	12.452	13.269	2010	10	1	1	1	94.685	1.04764	98.812	9.99548	2.29788	4.00298	7.31793	1338	53.43	246.9	11	8840	0	1	1	1	0	0
210000	辽宁省	副省级市	2017	大连市	35	大连	大连2017	大连市2017	12.4483	9.60657	10.9404	2010	7	1	1	1	100.033	0.97294	81.884	9.40839	1.32481	3.5444	5.28184	978			19	6189	0	1	1	1	1	0
230000	黑龙江省	地级市	2006	大庆市	36	大庆	大庆2006	大庆市2006	3.70507	0.82618	1.75409			0	0	0	60.493	0.5161	26.9805	3.19546	0.118459	0.866977	0	45	18.23	208.07	20	6344	0	0	0	1	0	0
230000	黑龙江省	地级市	2007	大庆市	36	大庆	大庆2007	大庆市2007	3.46156	0.59322	1.43725			0	0	0	67.161	0.5503	29.6807	3.44945	1.22119	0.866977	0	46	18.23	209	16	6261	0	0	0	1	0	0
230000	黑龙江省	地级市	2008	大庆市	36	大庆	大庆2008	大庆市2008	3.2753	1.37973	2.12794			0	0	0	80.655	0.5416	34.1519	3.71783	1.07335	0.866977	0	63	18.23	208.68	17	5958	0	0	0	1	0	0
230000	黑龙江省	地级市	2009	大庆市	36	大庆	大庆2009	大庆市2009	12.4071	4.6659	7.64354			0	0	0	76.068	0.5294	41.3728	3.98506	1.13102	0.866977	0	73	18.23	213.74	12	6140	0	0	0	1	0	0
230000	黑龙江省	地级市	2010	大庆市	36	大庆	大庆2010	大庆市2010	9.39644	4.1292	6.24543			0	0	0	103.576	0.5189	45.6885	3.3067	0.946982	0.866977	0	99	18.23	211.2	17	6017	0	0	0	1	0	0
230000	黑龙江省	地级市	2011	大庆市	36	大庆	大庆2011	大庆市2011	10.1341	4.27239	6.60036			0	0	0	133.301	0.555	49.5393	3.52607	0.797174	0.866977	0	140	18.23	210.77	8	5925	0	0	0	1	0	0
230000	黑龙江省	地级市	2012	大庆市	36	大庆	大庆2012	大庆市2012	9.46595	5.32919	7.11289			0	0	0	142.067	0.541	56.3913	3.50723	1.09525	0.866977	0	140	18.23	211.42	14	6965	0	0	0	1	0	0
230000	黑龙江省	地级市	2013	大庆市	36	大庆	大庆2013	大庆市2013	10.2717	5.37043	7.44169			0	0	0	147.756	0.531	64.305	3.43418	1.38056	0.866977	0	204	18.23	212.24	8	5013	0	0	0	1	0	0
230000	黑龙江省	地级市	2014	大庆市	36	大庆	大庆2014	大庆市2014	9.02193	4.42118	6.32836			0	0	0	146.518	0.53056	67.6713	3.45903	0.46438	0.866977	0	158	19.76	215.04	30	5525	0	0	0	1	0	0
230000	黑龙江省	地级市	2015	大庆市	36	大庆	大庆2015	大庆市2015	8.68415	3.92066	5.84856			0	0	0	110.113	0.5202	66.839	4.26457	0.256767	1.05362	0	196	28.59	222.06	7	5099	0	0	0	1	0	0
230000	黑龙江省	地级市	2016	大庆市	36	大庆	大庆2016	大庆市2016	6.01703	4.43821	5.16921			0	0	0	94.69	0.51675	72.459	4.99027	0.460436	1.23154	0	173	36.76	229.59	14	6444	0	0	0	1	0	0
230000	黑龙江省	地级市	2017	大庆市	36	大庆	大庆2017	大庆市2017	6.80549	6.31148	6.55398			0	0	0	97.677	0.50795	74.583	5.79266	0.168712	1.25853	0	179			15	6592	0	0	0	1	0	0
230000	黑龙江省	地级市	2018	大庆市	36	大庆	大庆2018	大庆市2018	7.2301	7.32324	7.27653			0	0	0	102.639	0.49171	89.756	5.38582	0.236964	1.27607	0	173	38.92	231.79	7	5247	0	0	0	1	0	0
230000	黑龙江省	地级市	2019	大庆市	36	大庆	大庆2019	大庆市2019	7.72148	8.09351	7.90539			0	0	0	94.289	0.46918	100.781	6.3916	1.06933	1.53202	0	155	38.82	230.26	9	5689	0	0	0	1	0	0
230000	黑龙江省	地级市	2020	大庆市	36	大庆	大庆2020	大庆市2020	7.83861	8.84195	8.3258			0	0	0	84.784	0.42667	96.088	6.64353	0.396527	1.91408	0	237	42.68	232.08	4	5952	0	0	0	1	0	0
140000	山西省	地级市	2006	大同市	37	大同	大同2006	大同市2006	7.09843	0.5299	1.95771			0	0	0	12.97	0.4736	19.3181	6.42656	0.207863	2.87455	0	4	41.84	235.92	23	7466	0	0	0	1	0	1
140000	山西省	地级市	2007	大同市	37	大同	大同2007	大同市2007	13.1464	1.89654	5.05649			0	0	0	15.581	0.4619	22.4497	7.4781	0.825917	2.80195	0	18	41.87	236.2	21	7250	0	0	0	1	0	1
140000	山西省	地级市	2008	大同市	37	大同	大同2008	大同市2008	13.3008	1.04316	3.78962			0	0	0	17.974	0.472	25.383	8.19245	0.768454	2.91339	0	20	41.74	236.4	23	7743	0	0	0	1	0	1
140000	山西省	地级市	2009	大同市	37	大同	大同2009	大同市2009	11.5856	0.8144	3.12011			0	0	0	18.71	0.4207	28.172	7.98603	0.630162	3.25843	0	31	47.09	241.87	8	7393	0	0	0	1	0	1
140000	山西省	地级市	2010	大同市	37	大同	大同2010	大同市2010	8.8395	1.06817	3.10177			0	0	0	21.369	0.4212	34.4312	7.9287	0.674223	3.24133	0	39	46.1	240.89	29	5650	0	0	0	1	0	1
140000	山西省	地级市	2011	大同市	37	大同	大同2011	大同市2011	9.4965	0.85761	2.88713			0	0	0	25.341	0.4243	43.87	7.66273	0.625797	2.99788	0	38	43.76	238.25	22	6092	0	0	0	1	0	1
140000	山西省	地级市	2012	大同市	37	大同	大同2012	大同市2012	8.67959	1.57081	3.71887			0	0	0	27.815	0.446	48.2101	8.62204	0.556668	2.98957	0	32	43.96	238.62	15	4465	0	0	0	1	0	1
140000	山西省	地级市	2013	大同市	37	大同	大同2013	大同市2013	7.93642	1.53888	3.51645			0	0	0	28.707	0.465	51.5774	9.77557	0.494366	3.31734	0	81	47.25	241.59	35	5712	0	0	0	1	0	1
140000	山西省	地级市	2014	大同市	37	大同	大同2014	大同市2014	8.41599	1.7525	3.8643			0	0	0	29.607	0.4197	56.1355	10.4764	0.582313	3.30945	0	69	49.83	244.13	18	4851	0	0	0	1	0	1
140000	山西省	地级市	2015	大同市	37	大同	大同2015	大同市2015	9.24893	2.12387	4.45984			0	0	0	30.989	0.40748	58.75	8.77149	0.26867	3.42575	0	74	52.85	247.47	20	6141	0	0	0	1	0	1
140000	山西省	地级市	2016	大同市	37	大同	大同2016	大同市2016	9.80349	3.06959	5.51163			0	0	0	30.046	0.40225	55.45	8.669	0.315298	3.75785	0	116	57.65	251.83	22	6263	0	0	0	1	0	1
140000	山西省	地级市	2017	大同市	37	大同	大同2017	大同市2017	10.5442	4.49609	6.907			0	0	0	32.671	0.39754	59.924	9.65626	0.676241	3.51376	0	113			33	5886	0	0	0	1	0	1
140000	山西省	地级市	2018	大同市	37	大同	大同2018	大同市2018	11.0569	5.64836	7.92033			0	0	0	36.877	0.39461	63.582	9.40997	0.65436	3.34729	0	120	58.4	253.32	20	7926	0	0	0	1	0	1
140000	山西省	地级市	2019	大同市	37	大同	大同2019	大同市2019	11.7088	6.38204	8.66154			0	0	0	38.122	0.38326	70.638	9.86608	0.622051	3.58707	0	77	57.4	251.98	26	8208	0	0	0	1	0	1
140000	山西省	地级市	2020	大同市	37	大同	大同2020	大同市2020	7.79739	6.13249	6.91672			0	0	0	43.982	0.37804	75.145	9.85711	0.59942	3.88474	0	160	57.88	252.77	50	9698	0	0	0	1	0	1
210000	辽宁省	地级市	2006	丹东市	38	丹东	丹东2006	丹东市2006	4.85484	0.84749	2.03676			0	0	0	15.893	0.1845	16.2576	5.68059	0.653051	1.91613	0.60062	13	41.04	225.95	6	6727	0	0	0	1	0	0
210000	辽宁省	地级市	2007	丹东市	38	丹东	丹东2007	丹东市2007	4.03943	0.71956	1.71063			0	0	0	19.119	0.1845	18.6718	6.22224	1.01984	1.76141	0.742048	25	40.59	226.29	6	5583	0	0	0	1	0	0
210000	辽宁省	地级市	2008	丹东市	38	丹东	丹东2008	丹东市2008	4.31277	0.76263	1.82013			0	0	0	23.223	0.1869	21.5288	6.66275	0.853426	1.59932	0.923204	18	39.2	225.49	7	7899	0	0	0	1	0	0
210000	辽宁省	地级市	2009	丹东市	38	丹东	丹东2009	丹东市2009	4.12307	0.6547	1.6491			0	0	0	25.034	0.2095	23.3426	8.25242	0.64142	1.86967	1.16042	52	37.48	223.16	10	6536	0	0	0	1	0	0
210000	辽宁省	地级市	2010	丹东市	38	丹东	丹东2010	丹东市2010	3.92327	1.27462	2.24027			0	0	0	29.893	0.2122	25.8662	11.0079	0.643685	1.91501	1.4126	36	35.07	221.34	7	4803	0	0	0	1	0	0
210000	辽宁省	地级市	2011	丹东市	38	丹东	丹东2011	丹东市2011	5.11136	1.97127	3.18005			0	0	0	36.841	0.268	27.0517	11.6265	0.76966	1.8458	1.7374	30	35.04	221.57	11	5357	0	0	0	1	0	0
210000	辽宁省	地级市	2012	丹东市	38	丹东	丹东2012	丹东市2012	4.94486	2.76312	3.69928			0	0	0	42.171	0.269	28.6266	12.6036	0.711901	1.87295	2.05968	31	36.13	222.34	9	4683	0	0	1	1	0	0
210000	辽宁省	地级市	2013	丹东市	38	丹东	丹东2013	丹东市2013	4.69153	4.97639	4.83191			0	0	0	46.137	0.318	32.1829	12.3149	0.962653	1.94254	2.36932	41	37.22	223.87	21	5495	0	0	1	1	0	0
210000	辽宁省	地级市	2014	丹东市	38	丹东	丹东2014	丹东市2014	5.81198	7.19606	6.46828			0	0	0	42.291	0.2879	32.5668	12.3215	0.819622	2.35864	2.60313	35	40.93	226.78	10	4935	0	0	1	1	0	0
210000	辽宁省	地级市	2015	丹东市	38	丹东	丹东2015	丹东市2015	5.16908	8.55511	6.65695			0	0	0	40.85	0.2578	35.79	6.73595	0.685678	2.72115	2.83398	58	43.18	227.27	10	4853	0	0	1	1	0	0
210000	辽宁省	地级市	2016	丹东市	38	丹东	丹东2016	丹东市2016	5.33315	11.5973	7.88784			0	0	0	31.223	0.22992	38.763	9.11716	0.592549	3.92357	3.13535	62	52.22	235.21	18	6972	0	0	1	1	0	0
210000	辽宁省	地级市	2017	丹东市	38	丹东	丹东2017	丹东市2017	5.18576	12.687	8.14434			0	0	0	32.819	0.19664	42.23	9.24255	0.462446	4.40221	3.52123	57			20	5429	0	0	1	1	0	0
210000	辽宁省	地级市	2018	丹东市	38	丹东	丹东2018	丹东市2018	5.0979	15.0408	8.81344			0	0	0	34.193	0.17568	44.077	8.98572	0.445734	4.24033	3.93559	90	52.75	236.06	23	6448	0	0	1	1	0	0
210000	辽宁省	地级市	2019	丹东市	38	丹东	丹东2019	丹东市2019	5.01322	16.4363	9.15151			0	0	0	32.256	0.18174	57.008	9.78256	0.173453	4.80173	4.42872	56	56.09	237.18	17	5532	0	0	1	1	0	0
210000	辽宁省	地级市	2020	丹东市	38	丹东	丹东2020	丹东市2020	6.1141	14.0514	9.30611			0	0	0	35.389	0.17024	61.537	9.96237	0.141775	5.08206	4.87862	88	55.97	236.2	12	5960	0	0	1	1	0	0
510000	四川省	地级市	2006	德阳市	39	德阳	德阳2006	德阳市2006	207.35	15.2697	81.9534			0	0	0	14.075	0.221	22.0671	4.03232	0.234463	1.42228	0.90093	17	27.26	208.56	13	4892	0	0	0	1	0	0
510000	四川省	地级市	2007	德阳市	39	德阳	德阳2007	德阳市2007	207.35	17.0386	82.2675			0	0	0	17.789	0.2223	27.0186	4.52773	1.35868	1.33159	1.11307	12	26.2	207.32	12	5625	0	0	0	1	0	0
510000	四川省	地级市	2008	德阳市	39	德阳	德阳2008	德阳市2008	207.35	19.3308	91.4542			0	0	0	19.084	0.2262	30.0763	3.64548	0.686204	1.8536	1.38481	15	26.21	207.59	9	5008	0	0	0	1	0	0
510000	四川省	地级市	2009	德阳市	39	德阳	德阳2009	德阳市2009	207.35	19.7041	86.0222			0	0	0	21.352	0.2442	34.1564	4.08183	0.559019	2.19557	1.74063	31	26.5	209.41	1	1369	0	0	0	1	0	0
510000	四川省	地级市	2010	德阳市	39	德阳	德阳2010	德阳市2010	196.289	26.366	85.8144			0	0	0	25.335	0.2574	39.4105	4.97115	0.415158	2.14967	2.1189	35	25.63	209.07	10	5173	0	0	0	1	0	0
510000	四川省	地级市	2011	德阳市	39	德阳	德阳2011	德阳市2011	195.729	27.6026	87.1391			0	0	0	31.562	0.2678	41.891	5.89835	1.03777	1.95869	2.6061	43	24.38	208.75	12	5753	0	0	0	1	0	0
510000	四川省	地级市	2012	德阳市	39	德阳	德阳2012	德阳市2012	207.35	26.7636	92.9639			0	0	0	35.945	0.257	46.6881	5.90001	1.36743	1.96263	3.08952	52	24.67	209.51	14	5877	0	0	0	1	0	0
510000	四川省	地级市	2013	德阳市	39	德阳	德阳2013	德阳市2013	207.35	32.201	98.4317			0	0	0	35.611	0.357	50.6649	5.76441	1.33919	1.96981	3.55398	98	26	212.06	15	4681	0	0	0	1	0	0
510000	四川省	地级市	2014	德阳市	39	德阳	德阳2014	德阳市2014	207.35	34.6394	108.464			0	0	0	43.091	0.3469	52.9301	5.5102	1.83632	1.96902	3.90469	118	27.15	214	24	4862	0	0	0	1	0	0
510000	四川省	地级市	2015	德阳市	39	德阳	德阳2015	德阳市2015	207.35	31.7363	121.26			0	0	0	45.701	0.32137	59.411	5.52095	1.19499	1.95769	4.25096	143	30.75	217.78	11	4636	0	0	0	1	0	0
510000	四川省	地级市	2016	德阳市	39	德阳	德阳2016	德阳市2016	207.35	35.1871	121.9			0	0	0	49.835	0.31757	67.166	5.71001	0.92126	1.99592	4.70303	259	33.47	220.94	11	5974	0	0	0	1	0	0
510000	四川省	地级市	2017	德阳市	39	德阳	德阳2017	德阳市2017	180.86	85.3404	121.9			0	0	0	55.607	0.30935	74.061	5.41517	0.87874	1.91165	5.28184	331			9	5953	0	0	0	1	0	0
510000	四川省	地级市	2018	德阳市	39	德阳	德阳2018	德阳市2018	165.165	86.2772	121.9			0	0	0	62.569	0.3097	83.862	5.31113	0.806543	1.86853	5.90338	423	40.63	229.64	18	4797	0	0	0	1	0	0
510000	四川省	地级市	2019	德阳市	39	德阳	德阳2019	德阳市2019	149.032	92.1635	118.821			0	0	0	65.745	0.28907	84.108	5.34947	1.19477	1.95286	6.64308	222	39.25	229.19	16	6996	0	0	0	1	0	0
510000	四川省	地级市	2020	德阳市	39	德阳	德阳2020	德阳市2020	142.881	97.8085	119.236			0	0	0	69.443	0.0645	88.437	5.49441	1.38529	2.16285	7.31793	341	41.68	230.32	17	6503	0	0	0	1	0	0
370000	山东省	地级市	2006	德州市	40	德州	德州2006	德州市2006	5.64326	0.14192	0.782623			0	0	0	18.071	0.3667	13.1222	3.56087	0.436628	1.18785	1.50155	19	30.21	216.18	11	6118	0	0	0	1	0	1
370000	山东省	地级市	2007	德州市	40	德州	德州2007	德州市2007	5.90906	0.14192	0.819803			0	0	0	21.723	0.3741	15.7762	3.55748	1.25915	1.11885	1.85512	28	31.05	217.59	20	6677	0	0	0	1	0	1
370000	山东省	地级市	2008	德州市	40	德州	德州2008	德州市2008	6.11382	0.92175	2.38749			0	0	0	25.606	0.3643	18.5872	3.36191	0.937849	1.11459	2.30801	33	31.96	219.84	14	6666	0	0	0	1	0	1
370000	山东省	地级市	2009	德州市	40	德州	德州2009	德州市2009	9.43318	0.54437	2.29717			0	0	0	28.046	0.3754	21.6474	3.74485	1.235	1.26118	2.90105	53	32.01	219.07	14	6038	0	0	0	1	0	1
370000	山东省	地级市	2010	德州市	40	德州	德州2010	德州市2010	12.8428	0.62164	2.88135			0	0	0	29.772	0.3855	24.2623	4.39786	1.29718	1.32508	3.5315	106	33.04	220.34	16	7642	0	0	0	1	0	1
370000	山东省	地级市	2011	德州市	40	德州	德州2011	德州市2011	12.7348	0.70596	3.05477			0	0	0	34.905	0.3848	28.3988	4.87327	1.47725	1.23811	4.3435	116	33.9	222.13	25	6604	0	0	0	1	0	1
370000	山东省	地级市	2012	德州市	40	德州	德州2012	德州市2012	16.8148	1.15967	4.51791			0	0	0	39.71	0.417	33.4774	5.39037	1.35927	1.23233	5.14921	122	34.86	223.92	15	5865	0	0	0	1	0	1
370000	山东省	地级市	2013	德州市	40	德州	德州2013	德州市2013	17.977	1.27603	4.90668			0	0	0	42.497	0.57	38.7998	6.09679	2.02841	1.30831	5.9233	177	35.98	224.86	10	4947	0	0	0	1	0	1
370000	山东省	地级市	2014	德州市	40	德州	德州2014	德州市2014	17.3458	1.4245	5.08161			0	0	0	45.641	0.57236	43.2032	6.59682	1.52875	1.38579	6.50781	189	39.26	228.82	40	5505	0	0	0	1	0	1
370000	山东省	地级市	2015	德州市	40	德州	德州2015	德州市2015	17.4232	1.54278	5.29703			0	0	0	48.062	0.56341	48.589	6.64427	2.22228	1.45998	7.08494	194	40.32	229.99	22	5996	0	0	0	1	0	1
370000	山东省	地级市	2016	德州市	40	德州	德州2016	德州市2016	18.0654	1.64214	5.56772			0	0	0	50.856	0.55489	54.39	6.25669	1.79998	1.53314	7.83838	281	42.06	231.96	26	5331	0	0	0	1	0	1
370000	山东省	地级市	2017	德州市	40	德州	德州2017	德州市2017	12.5933	2.98767	6.18452			0	0	0	54.222	0.54627	58.912	5.96715	1.42904	1.55835	8.80307	289			26	5984	0	0	0	1	0	1
370000	山东省	地级市	2018	德州市	40	德州	德州2018	德州市2018	13.6364	5.02256	8.31903			0	0	0	58.252	0.48461	62.69	5.99108	3.31912	1.59438	9.83896	322	42.82	233.35	31	6374	0	0	0	1	0	1
370000	山东省	地级市	2019	德州市	40	德州	德州2019	德州市2019	12.3794	8.11157	10.0319			0	0	0	52.295	0.41068	71.74	6.82557	2.62598	1.98426	11.0718	295	47.87	237.57	19	6280	0	0	0	1	0	1
370000	山东省	地级市	2020	德州市	40	德州	德州2020	德州市2020	10.3241	8.538	9.39064			0	0	0	54.872	0.40741	76.721	6.77326	1.94649	2.20995	12.1966	527	49.24	238.62	18	7584	0	0	0	1	0	1
620000	甘肃省	地级市	2006	定西市	41	定西	定西2006	定西市2006	1.11323	8.33586	3.07188			0	0	0	6.1	0.0961	14.3346	3.3426	0.247675	1.99207	0.60062		41.11	201.01	0	0	0	0	0	0	0	0
620000	甘肃省	地级市	2007	定西市	41	定西	定西2007	定西市2007	0.86779	12.0346	3.28407			0	0	0	6.1	0.1028	17.9762	3.23636	0.890392	1.96623	0.742048		39.01	200.94	8	5943	0	0	0	0	0	0
620000	甘肃省	地级市	2008	定西市	41	定西	定西2008	定西市2008	0.9552	12.7528	3.54937			0	0	0	6.1	0.1022	20.8875	3.81409	0.748012	2.28315	0.923204		40.97	204.84	6	5444	0	0	0	0	0	0
620000	甘肃省	地级市	2009	定西市	41	定西	定西2009	定西市2009	0.95246	3.39867	1.80257			0	0	0	6.1	0.1028	22.8876	3.82289	0.614208	2.49741	1.16042	1	45.66	214.89	0	0	0	0	0	0	0	0
620000	甘肃省	地级市	2010	定西市	41	定西	定西2010	定西市2010	1.24096	5.26967	2.56615			0	0	0	6.1	0.1063	27.7548	4.64398	0.649818	2.64892	1.4126	3	44.31	213.73	6	6419	0	0	0	0	0	0
620000	甘肃省	地级市	2011	定西市	41	定西	定西2011	定西市2011	1.21965	4.84291	2.43765			0	0	0	6.916	0.1097	32.7115	5.35155	0.637951	2.69021	1.7374	6	44	215.71	21	6711	0	0	0	0	0	0
620000	甘肃省	地级市	2012	定西市	41	定西	定西2012	定西市2012	1.03204	5.04481	2.29039			0	0	0	8.157	0.116	36.8356	5.87246	0.654668	2.90854	2.05968	5	42.72	212.4	12	6409	0	0	0	0	0	0
620000	甘肃省	地级市	2013	定西市	41	定西	定西2013	定西市2013	0.71116	2.34012	1.26021			0	0	0	8.407	0.162	36.968	6.75863	0.533867	3.303	2.36932	9	44.98	215.55	9	5876	0	0	0	0	0	0
620000	甘肃省	地级市	2014	定西市	41	定西	定西2014	定西市2014	0.71116	4.42029	1.74154			0	0	0	10.47	0.16279	40.8235	7.42469	0.554464	3.51863	2.60313	7	50.35	224.98	10	6537	0	0	0	0	0	0
620000	甘肃省	地级市	2015	定西市	41	定西	定西2015	定西市2015	0.71116	4.3524	1.74895			0	0	0	10.987	0.15523	13.1222	7.9854	0.430669	4.11098	2.83398	14	52.95	227.71	4	6689	0	0	0	0	0	0
620000	甘肃省	地级市	2016	定西市	41	定西	定西2016	定西市2016	0.7582	4.32779	1.81807			0	0	0	11.892	0.15572	54.735	7.58024	0.418002	4.32272	3.13535	12	53.43	229.66	16	8705	0	0	0	0	0	0
620000	甘肃省	地级市	2017	定西市	41	定西	定西2017	定西市2017	0.75909	41.5163	6.07378			0	0	0	11.693	0.14733	61.813	6.96999	0.426084	4.60652	3.52123	17			20	7919	0	0	0	0	0	0
620000	甘肃省	地级市	2018	定西市	41	定西	定西2018	定西市2018	0.71116	44.2063	4.87295			0	0	0	12.656	0.13136	66.545	6.75275	0.384035	4.49777	3.93559	25	59.55	241.14	19	8650	0	0	0	0	0	0
620000	甘肃省	地级市	2019	定西市	41	定西	定西2019	定西市2019	0.71553	49.8968	6.59407			0	0	0	14.746	0.14434	69.222	5.93041	0.387409	4.16538	4.42872	19	65.42	246.86	29	8059	0	0	0	0	0	0
620000	甘肃省	地级市	2020	定西市	41	定西	定西2020	定西市2020	3.54487	47.7946	13.8629			0	0	0	17.43	0.1556	75.289	5.82084	0.376136	4.33442	4.87862	33	64.07	244.02	42	7843	0	0	0	0	0	0
440000	广东省	地级市	2006	东莞市	42	东莞	东莞2006	东莞市2006	8.18146	25.0341	14.4732	2018	-12	1	0	0	39.468	0.208	31.134	4.90935	0.261942	1.9403	0	92	41.4	240.95	30	7763	0	0	0	1	0	0
440000	广东省	地级市	2007	东莞市	42	东莞	东莞2007	东莞市2007	18.1583	18.8722	18.5121	2018	-11	1	0	0	46.027	0.2147	35.2798	5.91535	4.72468	1.87397	0	137	42.8	242.42	22	5872	0	0	0	1	0	0
440000	广东省	地级市	2008	东莞市	42	东莞	东莞2008	东莞市2008	18.4223	27.4458	22.5345	2018	-10	1	0	0	53.285	0.2124	39.507	5.65085	4.32731	1.819	0	250	46.89	246.56	31	6130	0	0	0	1	0	0
440000	广东省	地级市	2009	东莞市	42	东莞	东莞2009	东莞市2009	18.9187	20.7256	19.8035	2018	-9	1	0	0	56.601	0.2268	42.591	6.14138	5.17051	2.09633	0	342	51.17	250.78	15	6278	0	0	0	1	0	0
440000	广东省	地级市	2010	东莞市	42	东莞	东莞2010	东莞市2010	17.017	22.6338	19.6445	2018	-8	1	0	0	66.351	0.232	46.5795	6.54293	2.75913	2.18376	0	563	48.72	248.33	25	6220	0	0	0	1	0	0
440000	广东省	地级市	2011	东莞市	42	东莞	东莞2011	东莞市2011	17.0794	19.803	18.3954	2018	-7	1	0	0	57.47	0.2487	49.8985	6.61115	5.15374	2.18049	0	789	49.65	249.27	21	6432	0	0	0	1	0	0
440000	广东省	地级市	2012	东莞市	42	东莞	东莞2012	东莞市2012	17.851	22.8241	20.1999	2018	-6	1	0	0	58.804	0.253	59.409	7.11202	4.80857	2.32049	0	850	52.21	251.84	21	7533	0	0	1	1	0	0
440000	广东省	地级市	2013	东莞市	42	东莞	东莞2013	东莞市2013	20.4525	22.0847	21.2546	2018	5	1	0	0	159.322	2.449	42.8702	7.45516	3.83006	2.4417	0	1162	53.75	253.38	11	5122	0	0	1	1	0	0
440000	广东省	地级市	2014	东莞市	42	东莞	东莞2014	东莞市2014	20.4986	23.755	22.0732	2018	4	1	0	0	70.605	2.38746	47.5995	7.73996	3.08142	2.531	0	939	52.14	251.79	31	5916	0	0	1	1	0	0
440000	广东省	地级市	2015	东莞市	42	东莞	东莞2015	东莞市2015	22.1601	26.2754	24.1403	2018	3	1	0	0	75.616	2.32275	53.221	8.25438	5.30482	2.54175	0	1374	53.1	252.78	11	5031	0	1	1	1	0	0
440000	广东省	地级市	2016	东莞市	42	东莞	东莞2016	东莞市2016	25.5619	27.1767	26.3585	2018	6	1	0	0	82.682	2.31239	57.649	7.97861	4.66173	2.57787	0	1775	53.17	252.82	20	6544	0	1	1	1	0	0
440000	广东省	地级市	2017	东莞市	42	东莞	东莞2017	东莞市2017	26.271	24.2835	25.2601	2018	-1	1	0	0	91.329	2.42399	61.619	7.80877	5.08621	2.4653	0	2685			30	9052	0	1	1	1	0	0
440000	广东省	地级市	2018	东莞市	42	东莞	东莞2018	东莞市2018	30.1389	23.6148	26.7035	2018	0	1	1	1	98.939	2.42415	69.937	7.8505	5.14035	2.58862	0	3649	51.05	250.75	20	8246	0	1	1	1	0	0
440000	广东省	地级市	2019	东莞市	42	东莞	东莞2019	东莞市2019	0.71116	38.5892	0.769705	2018	1	1	1	1	112.507	2.87328	74.017	7.10047	2.93886	2.63775	0	2478	43.16	242.86	11	8590	0	1	1	1	0	0
440000	广东省	地级市	2020	东莞市	42	东莞	东莞2020	东莞市2020	0.71116	37.1846	0.769705	2018	2	1	1	1	92.176	2.86306	79.601	7.19949	4.06894	3.05324	0	2922	45.88	245.57	2	4481	0	1	1	1	0	0
370000	山东省	地级市	2006	东营市	43	东营	东营2006	东营市2006	12.2963	0.14192	1.11827	2018	-12	1	0	0	74.048	0.3482	27.6096	3.31636	0.325891	0.881179	0	42	18.23	211.98	9	7541	0	0	0	1	0	1
370000	山东省	地级市	2007	东营市	43	东营	东营2007	东营市2007	13.9263	0.14192	1.24723	2018	-11	1	0	0	84.081	0.3593	30.1326	3.61138	1.58346	0.866977	0	73	20.12	216.48	30	5975	0	0	0	1	0	1
370000	山东省	地级市	2008	东营市	43	东营	东营2008	东营市2008	14.2627	0.82387	3.49925	2018	-10	1	0	0	102.741	0.3698	33.6747	3.45671	1.73949	0.866977	0	83	20.05	216.62	30	7244	0	0	0	1	0	1
370000	山东省	地级市	2009	东营市	43	东营	东营2009	东营市2009	15.5171	0.53364	2.9529	2018	-9	1	0	0	102.37	0.3799	36.9203	3.92778	1.69995	1.06866	0	88	22.45	218.82	21	6543	0	0	0	1	0	1
370000	山东省	地级市	2010	东营市	43	东营	东营2010	东营市2010	14.6525	0.62283	3.09164	2018	-8	1	0	0	116.448	0.401	41.1978	4.44427	1.42293	1.15054	0	114	23.74	220.02	42	6736	0	0	0	1	0	1
370000	山东省	地级市	2011	东营市	43	东营	东营2011	东营市2011	13.6851	0.65837	3.06499	2018	-7	1	0	0	130.811	0.4607	45.6084	5.05423	1.20724	1.23114	0	159	24.75	221.06	42	6910	0	0	0	1	0	1
370000	山东省	地级市	2012	东营市	43	东营	东营2012	东营市2012	12.5415	1.15879	3.87047	2018	-6	1	0	0	145.395	0.47	50.1942	5.28901	1.54594	1.36549	0	152	25.67	222.19	44	7175	0	0	0	1	0	1
370000	山东省	地级市	2013	东营市	43	东营	东营2013	东营市2013	12.2389	1.31514	4.06767	2018	5	1	0	0	159.322	0.488	56.8116	5.65486	2.16743	1.5011	0	199	26.91	223.32	24	6766	0	0	0	1	0	1
370000	山东省	地级市	2014	东营市	43	东营	东营2014	东营市2014	12.1843	1.51685	4.35407	2018	4	1	0	0	159.322	0.4783	60.7737	6.01182	2.19108	1.67066	0	202	30.02	226.64	22	5246	0	0	0	1	0	1
370000	山东省	地级市	2015	东营市	43	东营	东营2015	东营市2015	11.5557	1.69844	4.47895	2018	3	1	0	0	159.322	0.43859	67.466	6.37803	1.03777	1.88661	0	276	31.94	228.51	16	5084	0	0	0	1	0	1
370000	山东省	地级市	2016	东营市	43	东营	东营2016	东营市2016	11.7233	2.06848	4.97289	2018	6	1	0	0	159.322	0.43199	73.129	6.37619	1.1056	2.08118	0	346	34.33	230.83	19	5784	0	0	0	1	0	1
370000	山东省	地级市	2017	东营市	43	东营	东营2017	东营市2017	10.6581	2.63267	5.33269	2018	-1	1	0	0	159.322	0.39955	76.938	6.10538	2.3173	1.89632	0	310			16	5485	0	0	0	1	0	1
370000	山东省	地级市	2018	东营市	43	东营	东营2018	东营市2018	13.0034	4.36923	7.5805	2018	0	1	1	1	159.322	0.37367	89.503	5.89013	1.54955	1.71316	0	396	34.26	230.73	16	6189	0	0	0	1	0	1
370000	山东省	地级市	2019	东营市	43	东营	东营2019	东营市2019	13.5773	7.24402	9.94149	2018	1	1	1	1	134.022	0.37624	100.224	8.40541	1.87911	2.40198	0	295	37.56	232.58	18	5793	0	0	0	1	0	1
370000	山东省	地级市	2020	东营市	43	东营	东营2020	东营市2020	11.0122	8.46713	9.66014	2018	2	1	1	1	135.91	0.37631	107.271	8.36434	1.87206	2.46264	0	508	38.44	233.17	15	5437	0	0	0	1	0	1
150000	内蒙古自治区	地级市	2006	鄂尔多斯市	44	鄂尔	鄂尔2006	鄂尔多斯市2006	4.72075	0.18298	0.936506			0	0	0	53.163	0.1502	27.0739	6.7548	0.216797	0.975357	0	1	39.66	234.28	6	5549	0	0	0	0	0	0
150000	内蒙古自治区	地级市	2007	鄂尔多斯市	44	鄂尔	鄂尔2007	鄂尔多斯市2007	9.23722	0.41745	1.99204			0	0	0	75.164	0.1606	31.5831	6.69246	0.958969	0.866977	0	7	40.65	236.31	25	6692	0	0	0	0	0	0
150000	内蒙古自治区	地级市	2008	鄂尔多斯市	44	鄂尔	鄂尔2008	鄂尔多斯市2008	9.14925	0.72165	2.60011			0	0	0	102.128	0.1514	36.2613	7.37348	0.979914	0.890117	0	4	38.3	234.72	19	6200	0	0	0	0	0	0
150000	内蒙古自治区	地级市	2009	鄂尔多斯市	44	鄂尔	鄂尔2009	鄂尔多斯市2009	10.0617	2.26372	4.8056			0	0	0	134.4	0.1594	44.8158	7.49842	1.40765	1.2031	0	6	38.87	236.07	19	6004	0	0	0	0	0	0
150000	内蒙古自治区	地级市	2010	鄂尔多斯市	44	鄂尔	鄂尔2010	鄂尔多斯市2010	3.8731	5.16274	4.4727			0	0	0	159.322	0.1731	53.0181	9.0449	0.895602	1.25717	0	24	38.63	235.95	21	6215	0	0	0	0	0	0
150000	内蒙古自治区	地级市	2011	鄂尔多斯市	44	鄂尔	鄂尔2011	鄂尔多斯市2011	4.01362	4.97392	4.46862			0	0	0	159.322	0.2011	59.2986	10.7557	1.58758	1.23466	0	21	37.34	234.76	28	7633	0	0	0	0	0	0
150000	内蒙古自治区	地级市	2012	鄂尔多斯市	44	鄂尔	鄂尔2012	鄂尔多斯市2012	6.79724	2.02755	3.72533			0	0	0	159.322	0.223	66.4303	10.2689	0.991778	1.2068	0	18	37.01	234.53	16	5856	0	0	0	0	0	0
150000	内蒙古自治区	地级市	2013	鄂尔多斯市	44	鄂尔	鄂尔2013	鄂尔多斯市2013	9.01651	1.96547	4.23663			0	0	0	159.322	0.31	68.6356	11.123	0.768905	1.18665	0	38	37.64	235.16	24	6289	0	0	0	0	0	0
150000	内蒙古自治区	地级市	2014	鄂尔多斯市	44	鄂尔	鄂尔2014	鄂尔多斯市2014	10.7857	1.39274	3.91878			0	0	0	159.322	0.31162	62.6512	10.6048	0.433427	1.25336	0	39	39.44	236.98	12	4754	0	0	0	0	0	0
150000	内蒙古自治区	地级市	2015	鄂尔多斯市	44	鄂尔	鄂尔2015	鄂尔多斯市2015	7.1196	1.44239	3.2218			0	0	0	159.322	0.3323	73.377	10.551	0.641589	1.27802	0	63	40.87	238.53	21	5783	0	0	0	0	0	0
150000	内蒙古自治区	地级市	2016	鄂尔多斯市	44	鄂尔	鄂尔2016	鄂尔多斯市2016	7.3649	2.23382	4.0711			0	0	0	159.322	0.31293	74.496	10.209	0.367532	1.36444	0	108	41.85	239.41	16	6215	0	0	0	0	0	0
150000	内蒙古自治区	地级市	2017	鄂尔多斯市	44	鄂尔	鄂尔2017	鄂尔多斯市2017	2.01208	13.2447	5.22604			0	0	0	159.322	0.31939	78.166	8.72355	0.504337	1.57754	0	173			16	4827	0	0	0	0	0	0
150000	内蒙古自治区	地级市	2018	鄂尔多斯市	44	鄂尔	鄂尔2018	鄂尔多斯市2018	1.97169	15.2859	5.57638			0	0	0	159.322	0.30032	95.287	11.5183	0.594907	1.85498	0	278	44.55	241.44	21	6613	0	0	0	0	0	0
150000	内蒙古自治区	地级市	2019	鄂尔多斯市	44	鄂尔	鄂尔2019	鄂尔多斯市2019	1.65554	15.6396	5.17952			0	0	0	159.322	0.33987	99.292	13.8978	0.785813	2.01577	0	203	38.53	235.1	15	5346	0	0	0	0	0	0
150000	内蒙古自治区	地级市	2020	鄂尔多斯市	44	鄂尔	鄂尔2020	鄂尔多斯市2020	1.48692	16.4143	5.04019			0	0	0	159.322	0.3371	102.903	13.1544	1.06774	2.09922	0	302	39.39	235.54	26	7277	0	0	0	0	0	0
420000	湖北省	地级市	2006	鄂州市	45	鄂州	鄂州2006	鄂州市2006	15.9139	77.9208	37.2335			0	0	0	16.367	0.1536	13.1222	3.84049	0.473801	1.11026	0		34.82	219.89	21	7798	0	0	0	1	0	1
420000	湖北省	地级市	2007	鄂州市	45	鄂州	鄂州2007	鄂州市2007	22.5907	77.3904	43.4471			0	0	0	20.263	0.148	19.149	4.07691	1.192	0.970833	0	1	32.77	217.43	15	5988	0	0	0	1	0	1
420000	湖北省	地级市	2008	鄂州市	45	鄂州	鄂州2008	鄂州市2008	32.1526	102.835	60.1795			0	0	0	26.142	0.1539	16.1826	3.96605	1.03089	0.876095	0	5	29.72	214.33	24	7034	0	0	0	1	0	1
420000	湖北省	地级市	2009	鄂州市	45	鄂州	鄂州2009	鄂州市2009	26.4537	93.0137	51.9841			0	0	0	31.31	0.1674	13.1222	4.20126	0.756072	0.933144	0	8	31.05	217.46	21	6209	0	0	0	1	0	1
420000	湖北省	地级市	2010	鄂州市	45	鄂州	鄂州2010	鄂州市2010	19.2037	88.1556	43.6491			0	0	0	37.943	0.1822	13.8184	3.96248	0.760958	1.00774	0	5	28.46	215.46	19	4444	0	0	0	1	0	1
420000	湖北省	地级市	2011	鄂州市	45	鄂州	鄂州2011	鄂州市2011	16.5562	73.5922	36.6368			0	0	0	46.756	0.1899	26.0406	5.36053	1.12888	0.955817	0	9	28.53	216.09	24	6626	0	0	0	1	0	1
420000	湖北省	地级市	2012	鄂州市	45	鄂州	鄂州2012	鄂州市2012	21.6911	87.904	46.0034			0	0	0	53.192	0.2	27.5449	5.89163	1.24882	1.02203	0	7	27.61	215.24	21	6232	0	0	1	1	0	1
420000	湖北省	地级市	2013	鄂州市	45	鄂州	鄂州2013	鄂州市2013	16.2989	69.8528	35.2771			0	0	0	57.358	0.204	29.6275	6.09105	1.44696	1.06002	0	29	28.11	215.67	17	4307	0	0	1	1	0	1
420000	湖北省	地级市	2014	鄂州市	45	鄂州	鄂州2014	鄂州市2014	17.6392	78.8944	39.2951			0	0	0	64.851	0.2082	34.0416	6.22469	0.775511	1.09622	0	14	28.88	217.06	25	4988	0	0	1	1	0	1
420000	湖北省	地级市	2015	鄂州市	45	鄂州	鄂州2015	鄂州市2015	18.0676	75.6877	38.756			0	0	0	68.921	0.21551	37.215	6.46173	0.952161	1.16008	0	12	30.54	218.96	30	5478	0	0	1	1	0	1
420000	湖北省	地级市	2016	鄂州市	45	鄂州	鄂州2016	鄂州市2016	17.4736	79.2131	39.2228			0	0	0	74.983	0.22094	41.189	6.63121	2.99253	1.21959	0	26	33.34	221.14	29	5979	0	0	1	1	0	1
420000	湖北省	地级市	2017	鄂州市	45	鄂州	鄂州2017	鄂州市2017	22.5317	79.1824	43.9798			0	0	0	84.15	0.22162	46.92	6.43896	3.72497	1.22476	0	37			39	5361	0	0	1	1	0	1
420000	湖北省	地级市	2018	鄂州市	45	鄂州	鄂州2018	鄂州市2018	20.1875	71.3784	39.3882			0	0	0	93.317	0.22582	51.741	5.76221	2.45125	1.23777	0	40	38.54	229.17	21	4334	0	0	1	1	0	1
420000	湖北省	地级市	2019	鄂州市	45	鄂州	鄂州2019	鄂州市2019	20.1923	60.2802	35.7834			0	0	0	106.678	0.23336	56.038	5.26746	1.16489	1.20065	0	46	42.92	234.11	27	5031	0	0	1	1	0	1
420000	湖北省	地级市	2020	鄂州市	45	鄂州	鄂州2020	鄂州市2020	25.4671	75.9711	45.389			0	0	0	93.986	0.09537	82.032	4.82254	2.03499	1.59858	0	86	46.87	237.02	19	5357	0	0	1	1	0	1
450000	广西壮族自治区	地级市	2006	防城港市	46	防城	防城2006	防城港市2006	17.2489	54.9401	31.5742			0	0	0	14.763	0.0645	16.0102	4.35724	0.118459	1.27842	0	1	35.7	214.11	9	6497	0	0	0	1	0	0
450000	广西壮族自治区	地级市	2007	防城港市	46	防城	防城2007	防城港市2007	13.5535	58.9247	29.3656			0	0	0	19.329	0.0704	21.1408	4.86247	0.245757	1.22446	0	2	33.66	215.61	8	3852	0	0	0	1	0	0
450000	广西壮族自治区	地级市	2008	防城港市	46	防城	防城2008	防城港市2008	36.8037	83.4769	56.631			0	0	0	25.375	0.0784	24.6135	5.51419	0.252513	1.19789	0		33.11	216.1	11	3442	0	0	0	1	0	0
450000	广西壮族自治区	地级市	2009	防城港市	46	防城	防城2009	防城港市2009	23.8599	70.712	42.2884			0	0	0	29.602	0.0853	26.4237	7.35653	0.298729	1.42895	0	1	34.35	218.48	10	7062	0	0	0	1	0	0
450000	广西壮族自治区	地级市	2010	防城港市	46	防城	防城2010	防城港市2010	16.8158	56.475	31.6865			0	0	0	37.264	0.0891	29.856	7.0804	0.257766	1.52711	0	1	35.33	220.51	14	7170	0	0	0	1	0	0
450000	广西壮族自治区	地级市	2011	防城港市	46	防城	防城2011	防城港市2011	11.0434	46.8674	23.4451			0	0	0	47.416	0.0975	33.6562	6.8393	0.391457	1.39183	0	1	33.44	219.49	15	7608	0	0	0	1	0	0
450000	广西壮族自治区	地级市	2012	防城港市	46	防城	防城2012	防城港市2012	9.00926	57.6656	23.9951			0	0	0	50.302	0.104	36.862	8.0068	0.651	1.48837	0	1	33.62	219.83	12	6811	0	0	0	1	0	0
450000	广西壮族自治区	地级市	2013	防城港市	46	防城	防城2013	防城港市2013	7.50774	46.3276	19.4205			0	0	0	56.467	0.11	41.4076	7.75299	0.951977	1.46441	0	13	30.58	217.53	11	5231	0	0	0	1	0	0
450000	广西壮族自治区	地级市	2014	防城港市	46	防城	防城2014	防城港市2014	7.38852	64.1644	23.3212			0	0	0	65.184	0.09654	43.4517	7.71765	1.45124	1.44403	0	20	30.18	218.15	11	5445	0	0	0	1	0	0
450000	广西壮族自治区	地级市	2015	防城港市	46	防城	防城2015	防城港市2015	10.8659	80.8846	32.0687			0	0	0	67.972	0.1084	51.432	8.3853	0.507827	1.50406	0	18	30.93	218.73	24	6371	0	0	0	1	0	0
450000	广西壮族自治区	地级市	2016	防城港市	46	防城	防城2016	防城港市2016	8.50959	80.4239	28.6081			0	0	0	73.188	0.09729	55.409	8.2312	0.509953	1.58835	0	14	30.65	218.45	23	5532	0	0	0	1	0	0
450000	广西壮族自治区	地级市	2017	防城港市	46	防城	防城2017	防城港市2017	9.28038	79.8862	29.6295			0	0	0	79.351	0.08319	63.484	6.41855	0.276508	1.68367	0	14			21	5543	0	0	0	1	0	0
450000	广西壮族自治区	地级市	2018	防城港市	46	防城	防城2018	防城港市2018	7.52952	70.8071	24.984			0	0	0	73.601	0.07768	71.658	6.31104	0.311843	1.92355	0	19	36.76	222.86	33	7970	0	0	0	1	0	0
450000	广西壮族自治区	地级市	2019	防城港市	46	防城	防城2019	防城港市2019	5.42248	58.2237	19.0468			0	0	0	73.163	0.07356	78.165	6.76304	0.286166	2.11247	0	10	37.23	221.68	29	7210	0	0	0	1	0	0
450000	广西壮族自治区	地级市	2020	防城港市	46	防城	防城2020	防城港市2020	6.17626	58.7749	20.3554			0	0	0	70.697	0.08438	88.304	7.32513	0.223059	2.31874	0	41	37.38	222.24	16	8075	0	0	0	1	0	0
440000	广东省	地级市	2006	佛山市	47	佛山	佛山2006	佛山市2006	10.1061	24.6111	15.8936	2018	-12	1	0	0	50.232	0.5256	25.1907	5.36386	1.14566	2.28699	3.0031	140	34.5	231.92	12	7003	0	0	0	1	0	1
440000	广东省	地级市	2007	佛山市	47	佛山	佛山2007	佛山市2007	8.81396	20.5428	13.5367	2018	-11	1	0	0	61.199	0.5465	28.3314	5.39631	3.56791	2.13768	3.71024	217	33.15	230.87	32	6833	0	0	0	1	0	1
440000	广东省	地级市	2008	佛山市	47	佛山	佛山2008	佛山市2008	6.94269	30.3237	14.8062	2018	-10	1	0	0	72.975	0.551	31.0441	5.26143	3.23238	2.01166	4.61602	204	32.2	230	41	6629	0	0	0	1	0	1
440000	广东省	地级市	2009	佛山市	47	佛山	佛山2009	佛山市2009	7.91397	22.8798	13.5848	2018	-9	1	0	0	80.686	0.5548	34.0629	5.28322	3.14935	2.34668	5.80211	290	35	233.01	24	6763	0	0	0	1	0	1
440000	广东省	地级市	2010	佛山市	47	佛山	佛山2010	佛山市2010	8.29424	24.4631	14.394	2018	-8	1	0	0	93.983	0.5607	37.0817	5.41544	3.12004	2.35889	7.063	400	35.45	233.57	12	4809	0	0	0	1	0	1
440000	广东省	地级市	2011	佛山市	47	佛山	佛山2011	佛山市2011	27.9597	17.9336	22.4522	2018	-7	1	0	0	91.202	0.6068	40.6649	5.19328	3.31822	2.23881	8.687	564	34.58	232.78	22	4023	0	0	0	1	0	1
440000	广东省	地级市	2012	佛山市	47	佛山	佛山2012	佛山市2012	23.8038	21.6378	22.6978	2018	-6	1	0	0	91.259	0.65	46.2052	5.80794	3.87874	2.40616	10.2984	499	35.83	233.86	16	5305	0	0	1	1	0	1
440000	广东省	地级市	2013	佛山市	47	佛山	佛山2013	佛山市2013	28.07	20.6206	24.0918	2018	5	1	0	0	159.322	1.742	50.3553	6.2511	3.35173	2.6388	11.8466	729	36.1	234.12	17	7248	0	0	1	1	0	1
440000	广东省	地级市	2014	佛山市	47	佛山	佛山2014	佛山市2014	24.7033	22.8806	23.7765	2018	4	1	0	0	101.617	1.73574	55.6784	6.73501	2.9287	2.53594	13.0156	824	36.36	234.56	30	7234	0	0	1	1	0	1
440000	广东省	地级市	2015	佛山市	47	佛山	佛山2015	佛山市2015	34.7462	23.5047	28.6526	2018	3	1	0	0	108.299	1.70039	61.81	6.96592	3.78457	2.47606	14.1699	1100	37.83	236.11	32	6295	0	1	1	1	0	1
440000	广东省	地级市	2016	佛山市	47	佛山	佛山2016	佛山市2016	34.641	25.0897	29.535	2018	6	1	0	0	115.891	1.71723	67.187	7.00464	5.02346	2.46874	15.6768	1361	38.69	237.01	29	6738	0	1	1	1	0	1
440000	广东省	地级市	2017	佛山市	47	佛山	佛山2017	佛山市2017	38.3802	21.7939	29.0826	2018	-1	1	0	0	124.324	1.65162	72.712	7.0392	5.96965	2.42268	17.6061	2061			27	8200	0	1	1	1	0	1
440000	广东省	地级市	2018	佛山市	47	佛山	佛山2018	佛山市2018	39.4691	21.7233	29.4653	2018	0	1	1	1	127.691	1.6333	80.288	7.07679	6.77916	2.5498	19.6779	2938	42.04	240.57	27	8966	0	1	1	1	0	1
440000	广东省	地级市	2019	佛山市	47	佛山	佛山2019	佛山市2019	50.7886	24.9503	35.981	2018	1	1	1	1	133.85	1.51639	86.401	6.80509	7.58828	2.67119	22.1436	2155	42.32	240.86	25	8659	0	1	1	1	0	1
440000	广东省	地级市	2020	佛山市	47	佛山	佛山2020	佛山市2020	49.6463	24.2283	35.0535	2018	2	1	1	1	114.157	1.51314	94.536	6.96709	7.58828	3.06373	24.3931	2641	42.13	240.61	9	4924	0	1	1	1	0	1
350000	福建省	地级市	2006	福州市	48	福州	福州2006	福州市2006	26.0727	37.9856	31.5539	2010	4	1	0	0	24.874	0.8719	20.6651	6.94801	0.444762	3.05029	3.0031	79	42.73	231.51	9	7877	0	0	0	1	1	1
350000	福建省	地级市	2007	福州市	48	福州	福州2007	福州市2007	18.7743	29.9312	23.7792	2010	3	1	0	0	29.515	0.923	23.9505	7.42254	1.65879	3.00345	3.71024	95	43.17	232.81	25	7445	0	0	0	1	1	1
350000	福建省	地级市	2008	福州市	48	福州	福州2008	福州市2008	21.68	37.9937	28.8562	2010	6	1	0	0	33.615	0.9584	27.5211	7.39247	1.61862	3.03699	4.61602	142	42.26	231.96	25	7334	0	0	0	1	1	1
350000	福建省	地级市	2009	福州市	48	福州	福州2009	福州市2009	16.4266	24.5019	20.1011	2010	-1	1	0	0	38.015	0.987	30.7044	7.49838	1.61478	3.4053	5.80211	202	48.15	238.86	26	7534	0	0	0	1	1	1
350000	福建省	地级市	2010	福州市	48	福州	福州2010	福州市2010	26.2888	33.7892	29.8373	2010	0	1	1	1	44.667	1.0547	34.8045	7.9343	1.5913	3.5111	7.063	328	46.06	236.99	33	8266	0	0	0	1	1	1
350000	福建省	地级市	2011	福州市	48	福州	福州2011	福州市2011	21.8005	17.7521	19.6823	2010	1	1	1	1	52.152	1.2807	42.2401	8.56539	1.35631	3.39025	8.687	402	45.5	236.8	19	9458	0	0	0	1	1	1
350000	福建省	地级市	2012	福州市	48	福州	福州2012	福州市2012	27.2978	29.4783	28.3699	2010	2	1	1	1	58.304	1.437	48.0876	9.05616	1.57717	3.41822	10.2984	489	45.84	237.12	23	8124	0	0	0	1	1	1
350000	福建省	地级市	2013	福州市	48	福州	福州2013	福州市2013	27.2864	26.9841	27.1349	2010	-3	1	1	1	71.427	1.428	53.3341	9.70331	1.6158	3.65716	11.8466	563	45.8	237.2	16	5233	0	0	0	1	1	1
350000	福建省	地级市	2014	福州市	48	福州	福州2014	福州市2014	31.737	31.1965	31.4658	2010	-4	1	1	1	69.995	1.4917	58.8381	9.88304	1.62277	3.77196	13.0156	566	46.45	238.4	25	5281	0	0	0	1	1	1
350000	福建省	地级市	2015	福州市	48	福州	福州2015	福州市2015	27.3786	44.6673	35.1444	2010	-5	1	1	1	75.259	1.56277	62.478	9.97606	1.38517	3.82943	14.1699	770	48.66	240.92	27	5714	0	0	0	1	1	1
350000	福建省	地级市	2016	福州市	48	福州	福州2016	福州市2016	30.4731	64.529	44.9992	2010	-2	1	1	1	82.251	1.56827	67.63	9.66354	1.35507	3.90491	15.6768	1218	50.26	242.32	30	6612	0	1	0	1	1	1
350000	福建省	地级市	2018	福州市	48	福州	福州2018	福州市2018	12.0405	52.1607	25.928	2010	8	1	1	1	102.037	1.74229	83.175	8.65974	3.14424	3.65858	19.6779	1935	52.91	246.61	24	6144	0	1	0	1	1	1
350000	福建省	地级市	2019	福州市	48	福州	福州2019	福州市2019	11.8174	55.0784	26.5101	2010	9	1	1	1	120.879	1.76193	88.952	7.11325	3.03143	3.46091	22.1436	1283	53.61	248.02	14	5741	0	1	0	1	1	1
350000	福建省	地级市	2020	福州市	48	福州	福州2020	福州市2020	11.9923	47.9465	24.6838	2010	10	1	1	1	121.015	1.56114	96.478	6.7426	4.55049	3.66178	24.3931	1975	56.07	250.47	17	5885	0	1	0	1	1	1
350000	福建省	地级市	2017	福州市	48	福州	福州2017	福州市2017	13.1863	61.3222	29.6687	2010	7	1	1	1	92.144	1.58772	75.133	9.02438	2.09579	3.76494	17.6061	1169			17	6152	0	1	0	1	1	1
210000	辽宁省	地级市	2006	抚顺市	49	抚顺	抚顺2006	抚顺市2006	11.7012	2.51141	5.4665			0	0	0	20.426	0.2832	19.7388	6.02004	0.32915	1.69411	0.30031	14	37.55	230.68	6	4463	0	0	0	1	0	1
210000	辽宁省	地级市	2007	抚顺市	49	抚顺	抚顺2007	抚顺市2007	13.8799	2.72502	6.21612			0	0	0	24.451	0.2769	23.9924	6.71522	0.813217	1.44104	0.371024	13	37.37	230.69	13	5721	0	0	0	1	0	1
210000	辽宁省	地级市	2008	抚顺市	49	抚顺	抚顺2008	抚顺市2008	12.3342	2.39455	5.48696			0	0	0	29.645	0.2699	28.1005	6.81943	0.906678	1.34193	0.461602	19	36.56	229.88	23	6093	0	0	0	1	0	1
210000	辽宁省	地级市	2009	抚顺市	49	抚顺	抚顺2009	抚顺市2009	9.51356	2.01492	4.40854			0	0	0	31.343	0.2649	30.8269	7.69597	0.643315	1.62487	0.580211	17	37.21	230.56	14	4671	0	0	0	1	0	1
210000	辽宁省	地级市	2010	抚顺市	49	抚顺	抚顺2010	抚顺市2010	7.28903	3.80022	5.27043			0	0	0	41.81	0.2676	35.15	9.0767	0.768501	1.45301	0.7063	37	35.18	229.06	12	4357	0	0	0	1	0	1
210000	辽宁省	地级市	2011	抚顺市	49	抚顺	抚顺2011	抚顺市2011	6.6362	4.27828	5.33178			0	0	0	52.245	0.2821	36.1862	9.56573	0.958568	1.33138	0.8687	34	33.18	226.85	13	5227	0	0	0	1	0	1
210000	辽宁省	地级市	2012	抚顺市	49	抚顺	抚顺2012	抚顺市2012	6.89566	4.70876	5.70118			0	0	0	58.512	0.309	38.7544	10.5271	1.27287	1.33325	1.02984	49	33.53	226.65	17	5202	0	0	1	1	0	1
210000	辽宁省	地级市	2013	抚顺市	49	抚顺	抚顺2013	抚顺市2013	9.0663	7.00539	7.97211			0	0	0	61.488	0.328	42.524	10.0123	1.17466	1.38479	1.18466	65	33.65	226.59	28	4948	0	0	1	1	0	1
210000	辽宁省	地级市	2014	抚顺市	49	抚顺	抚顺2014	抚顺市2014	12.3522	7.9124	9.8981			0	0	0	61.183	0.30742	45.6223	10.5165	1.2011	1.57818	1.30156	39	38.41	231.1	18	4180	0	0	1	1	0	1
210000	辽宁省	地级市	2015	抚顺市	49	抚顺	抚顺2015	抚顺市2015	22.8097	7.72916	13.4081			0	0	0	58.597	0.27447	50.225	6.06398	0.898659	1.84548	1.41699	58	43.07	235.01	22	4651	0	0	1	1	0	1
210000	辽宁省	地级市	2016	抚顺市	49	抚顺	抚顺2016	抚顺市2016	28.4284	7.44885	14.7955			0	0	0	41.741	0.24967	52.708	8.93894	0.243864	2.72072	1.56767	100	42.88	236.14	33	6254	0	0	1	1	0	1
210000	辽宁省	地级市	2017	抚顺市	49	抚顺	抚顺2017	抚顺市2017	25.2433	8.92689	15.1644			0	0	0	45.934	0.23703	56.941	9.27086	0.137887	2.74645	1.76061	110			18	5983	0	0	1	1	0	1
210000	辽宁省	地级市	2018	抚顺市	49	抚顺	抚顺2018	抚顺市2018	24.1182	10.37	15.9254			0	0	0	50.951	0.21558	63.156	8.5236	0.184527	2.6844	1.96779	133	39.94	234.7	26	6930	0	0	1	1	0	1
210000	辽宁省	地级市	2019	抚顺市	49	抚顺	抚顺2019	抚顺市2019	24.9919	11.4545	17.0272			0	0	0	41.382	0.21079	66.686	8.87962	0.140146	3.6	2.21436	89	44.01	237.36	19	4850	0	0	1	1	0	1
210000	辽宁省	地级市	2020	抚顺市	49	抚顺	抚顺2020	抚顺市2020	24.9076	11.8886	17.3079			0	0	0	44.137	0.20142	74.909	9.26172	0.232786	4.15735	2.43931	191	45.89	238.76	9	3217	0	0	1	1	0	1
360000	江西省	地级市	2006	抚州市	50	抚州	抚州2006	抚州市2006	12.5645	21.8746	16.6302			0	0	0	8.196	0.2028	13.1222	6.54926	0.266668	1.55452	1.20124	2	31.88	208.06	9	7870	0	0	0	1	0	1
360000	江西省	地级市	2007	抚州市	50	抚州	抚州2007	抚州市2007	13.7136	16.3683	14.9866			0	0	0	9.57	0.2082	13.6943	5.47754	0.657572	1.49389	1.4841	5	31.5	209.73	2	6680	0	0	0	1	0	1
360000	江西省	地级市	2008	抚州市	50	抚州	抚州2008	抚州市2008	14.6742	30.5233	21.3111			0	0	0	11.233	0.2034	15.4619	5.98925	0.752047	1.43767	1.84641	6	29.83	207.65	12	7394	0	0	0	1	0	1
360000	江西省	地级市	2009	抚州市	50	抚州	抚州2009	抚州市2009	16.5288	15.0258	15.7607			0	0	0	12.923	0.2137	18.2051	7.0778	0.681589	1.57434	2.32084	5	31	209.28	11	7259	0	0	0	1	0	1
360000	江西省	地级市	2010	抚州市	50	抚州	抚州2010	抚州市2010	18.0193	16.6931	17.3446			0	0	0	16.083	0.2117	21.4212	8.79778	0.613	1.55767	2.8252	11	31.06	212.02	27	5345	0	0	0	1	0	1
360000	江西省	地级市	2011	抚州市	50	抚州	抚州2011	抚州市2011	15.3676	10.2082	12.5411			0	0	0	18.907	0.2391	26.3413	10.2344	0.610525	1.57173	3.4748	11	28.28	209.84	25	6496	0	0	0	1	0	1
360000	江西省	地级市	2012	抚州市	50	抚州	抚州2012	抚州市2012	36.8321	11.9626	21.3401			0	0	0	20.922	0.298	32.6379	10.575	0.893876	1.71187	4.11936	14	28.74	210.32	7	5215	0	0	0	1	0	1
360000	江西省	地级市	2013	抚州市	50	抚州	抚州2013	抚州市2013	34.4964	11.6188	20.3174			0	0	0	22.396	0.366	40.3117	10.6818	1.05319	1.81826	4.73864	30	30.63	213.25	18	5520	0	0	0	1	0	1
360000	江西省	地级市	2014	抚州市	50	抚州	抚州2014	抚州市2014	42.2935	12.3549	23.3581			0	0	0	26.119	0.38244	45.6462	11.2251	1.22331	1.94864	5.20625	46	31.65	214.89	24	5271	0	0	0	1	0	1
360000	江西省	地级市	2015	抚州市	50	抚州	抚州2015	抚州市2015	41.2804	15.3096	25.5238			0	0	0	27.735	0.38958	49.522	11.4754	1.68151	2.02472	5.66795	87	33.84	217.37	23	5271	0	0	0	1	0	1
360000	江西省	地级市	2016	抚州市	50	抚州	抚州2016	抚州市2016	38.3912	16.6613	25.5642			0	0	0	30.259	0.37714	54.607	10.1412	1.78331	2.2937	6.2707	97	34.9	218.63	40	6474	0	0	0	1	0	1
360000	江西省	地级市	2017	抚州市	50	抚州	抚州2017	抚州市2017	11.2779	18.1176	14.3226			0	0	0	32.242	0.35804	59.542	9.26943	2.19933	2.52478	7.04245	129			35	5675	0	0	1	1	0	1
360000	江西省	地级市	2018	抚州市	50	抚州	抚州2018	抚州市2018	11.8005	16.2107	13.8427			0	0	0	34.226	0.32648	62.885	9.33473	2.55117	2.65917	7.87117	371	44.64	230.22	33	7755	0	0	1	1	0	1
360000	江西省	地级市	2019	抚州市	50	抚州	抚州2019	抚州市2019	13.201	19.7968	16.1922			0	0	0	37.272	0.34421	67.544	8.55344	2.74364	2.73192	8.85744	242	47.77	233.51	11	3840	0	1	1	1	0	1
360000	江西省	地级市	2020	抚州市	50	抚州	抚州2020	抚州市2020	14.7104	18.6706	16.5821			0	0	0	43.305	0.36552	71.861	8.28593	2.97502	3.06641	9.75724	232	48.44	234.31	36	5304	0	1	1	1	0	1
210000	辽宁省	地级市	2006	阜新市	51	阜新	阜新2006	阜新市2006	4.41175	1.76161	2.79194			0	0	0	8.227	0.1697	14.7024	5.65334	0.129897	2.73553	0	14	41.4	220.66	5	6958	0	0	0	1	0	0
210000	辽宁省	地级市	2007	阜新市	51	阜新	阜新2007	阜新市2007	4.77299	1.67698	2.83475			0	0	0	10.025	0.1661	18.4793	5.68248	0.305961	2.51672	0	12	39.56	217.98	10	6150	0	0	0	1	0	0
210000	辽宁省	地级市	2008	阜新市	51	阜新	阜新2008	阜新市2008	4.64854	1.88068	2.96129			0	0	0	12.134	0.1646	21.5569	6.24726	0.502926	2.4811	0	9	37.71	215.41	17	8497	0	0	0	1	0	0
210000	辽宁省	地级市	2009	阜新市	51	阜新	阜新2009	阜新市2009	4.38737	1.36733	2.45451			0	0	0	14.967	0.1717	23.0073	6.45826	0.256605	2.50896	0	12	36.67	214.53	13	5516	0	0	0	1	0	0
210000	辽宁省	地级市	2010	阜新市	51	阜新	阜新2010	阜新市2010	4.83227	2.74333	3.64361			0	0	0	20.819	0.1754	25.3482	7.93685	0.241979	2.28213	0	17	33.72	209.26	10	5860	0	0	0	1	0	0
210000	辽宁省	地级市	2011	阜新市	51	阜新	阜新2011	阜新市2011	4.4388	2.91146	3.59634			0	0	0	26.48	0.1957	33.1082	10.4409	0.685261	2.16942	0	17	32.64	209.73	13	5399	0	0	0	1	0	0
210000	辽宁省	地级市	2012	阜新市	51	阜新	阜新2012	阜新市2012	4.39069	3.47413	3.90613			0	0	0	31.049	0.217	38.5647	11.4347	0.823044	2.16569	0	15	31.92	209.51	9	4673	0	0	1	1	0	0
210000	辽宁省	地级市	2013	阜新市	51	阜新	阜新2013	阜新市2013	4.94273	5.10784	5.02463			0	0	0	32.205	0.227	40.0512	11.4606	0.738618	2.32287	0	21	31.98	210.29	7	4410	0	0	1	1	0	0
210000	辽宁省	地级市	2014	阜新市	51	阜新	阜新2014	阜新市2014	5.12657	6.08508	5.58587			0	0	0	33.882	0.2146	41.4308	11.7485	0.247159	2.5309	0	26	35.6	215.9	10	4413	0	0	1	1	0	0
210000	辽宁省	地级市	2015	阜新市	51	阜新	阜新2015	阜新市2015	5.57074	6.27231	5.91143			0	0	0	29.491	0.19256	45.939	7.06941	0.305323	3.20546	0	33	39.28	216.77	17	4879	0	0	1	1	0	0
210000	辽宁省	地级市	2016	阜新市	51	阜新	阜新2016	阜新市2016	5.03485	7.32954	6.07802			0	0	0	22.956	0.15244	49.601	8.78809	0.222939	4.52419	0	38	49.19	225.56	23	5090	0	0	1	1	0	0
210000	辽宁省	地级市	2017	阜新市	51	阜新	阜新2017	阜新市2017	7.38857	12.5682	9.65268			0	0	0	23.105	0.15162	54.331	9.33207	0.192541	4.9374	0	47			19	5278	0	0	1	1	0	0
210000	辽宁省	地级市	2018	阜新市	51	阜新	阜新2018	阜新市2018	4.98518	9.71408	6.97237			0	0	0	25.34	0.15604	56.271	9.42031	0.126209	4.82458	0	41	51.05	229.68	6	5125	0	0	1	1	0	0
210000	辽宁省	地级市	2019	阜新市	51	阜新	阜新2019	阜新市2019	5.5802	11.3047	7.96208			0	0	0	27.945	0.1447	59.849	8.74209	0.151257	4.63183	0	38	51.71	229.96	17	5239	0	0	1	1	0	0
210000	辽宁省	地级市	2020	阜新市	51	阜新	阜新2020	阜新市2020	5.27086	11.5378	7.82172			0	0	0	30.541	0.13705	63.67	8.7944	0.234779	4.95684	0	98	51.49	228.72	8	4421	0	0	1	1	0	0
340000	安徽省	地级市	2006	阜阳市	52	阜阳	阜阳2006	阜阳市2006	5.71171	1.52555	2.96168			0	0	0	6.1	0.2733	13.7945	3.66926	0.179472	2.08921	0.30031	2	37.35	205.65	0	0	0	0	0	1	0	0
340000	安徽省	地级市	2007	阜阳市	52	阜阳	阜阳2007	阜阳市2007	8.22681	1.59925	3.65052			0	0	0	6.1	0.2719	17.5759	3.75383	0.407491	2.00782	0.371024	5	36.84	206.98	13	6348	0	0	0	1	0	0
340000	安徽省	地级市	2008	阜阳市	52	阜阳	阜阳2008	阜阳市2008	17.0251	1.75676	5.57688			0	0	0	6.475	0.2745	20.3827	4.18361	0.354179	1.91432	0.461602	14	36.02	205.43	13	6230	0	0	0	1	0	0
340000	安徽省	地级市	2009	阜阳市	52	阜阳	阜阳2009	阜阳市2009	21.2199	1.02123	4.80846			0	0	0	7.288	0.2809	22.1586	4.9231	0.301131	2.0294	0.580211	14	35.3	206.49	11	6527	0	0	0	1	0	0
340000	安徽省	地级市	2010	阜阳市	52	阜阳	阜阳2010	阜阳市2010	22.8931	1.11632	5.23449			0	0	0	9.068	0.2911	26.2752	5.70521	0.35674	2.05614	0.7063	22	33.49	206.15	15	6635	0	0	0	1	0	0
340000	安徽省	地级市	2011	阜阳市	52	阜阳	阜阳2011	阜阳市2011	23.3185	1.06858	5.17533			0	0	0	11.202	0.3051	32.4805	6.53234	0.606426	2.09149	0.8687	84	32.64	205.39	10	7027	0	0	0	1	0	0
340000	安徽省	地级市	2012	阜阳市	52	阜阳	阜阳2012	阜阳市2012	25.1331	1.05088	5.34853			0	0	0	12.616	0.296	35.9242	7.20131	0.69129	2.21321	1.02984	57	32.79	206.88	8	6424	0	0	0	1	0	0
340000	安徽省	地级市	2013	阜阳市	52	阜阳	阜阳2013	阜阳市2013	24.2884	1.50166	6.25001			0	0	0	10.09	0.293	39.4745	8.04316	0.608605	2.38472	1.18466	139	33.25	207.58	15	5778	0	0	0	1	0	0
340000	安徽省	地级市	2014	阜阳市	52	阜阳	阜阳2014	阜阳市2014	20.618	1.79831	6.24663			0	0	0	15.303	0.31619	42.2883	8.70583	0.47905	2.53055	1.30156	69	34.26	210.96	6	5432	0	0	0	1	0	0
340000	安徽省	地级市	2015	阜阳市	52	阜阳	阜阳2015	阜阳市2015	15.7811	2.69363	6.60844			0	0	0	16.121	0.32275	48.583	9.47118	0.900194	2.87167	1.41699	126	36.67	214.08	14	5379	0	0	0	1	0	0
340000	安徽省	地级市	2016	阜阳市	52	阜阳	阜阳2016	阜阳市2016	25.7	4.19689	10.6226			0	0	0	17.642	0.33675	52.718	9.51908	1.14092	3.25912	1.56767	202	38.65	217.1	26	6552	0	0	0	1	0	0
340000	安徽省	地级市	2017	阜阳市	52	阜阳	阜阳2017	阜阳市2017	10.6227	5.96097	7.97064			0	0	0	19.536	0.34484	59.802	10.0323	1.05428	3.53677	1.76061	180			24	6352	0	0	0	1	0	0
340000	安徽省	地级市	2018	阜阳市	52	阜阳	阜阳2018	阜阳市2018	10.2913	7.12042	8.56642			0	0	0	21.589	0.3958	66.886	10.6361	0.872156	3.80595	1.96779	389	40.44	222.78	26	5950	0	0	0	1	0	0
340000	安徽省	地级市	2019	阜阳市	52	阜阳	阜阳2019	阜阳市2019	10.3488	7.27764	8.68418			0	0	0	32.855	0.43077	73.342	7.41699	1.10316	2.78649	2.21436	292	48.85	235.9	16	6136	0	0	0	1	0	0
340000	安徽省	地级市	2020	阜阳市	52	阜阳	阜阳2020	阜阳市2020	10.6296	8.53178	9.52578			0	0	0	34.399	0.39207	78.062	7.10358	1.07704	2.97887	2.43931	380	48.95	234.99	14	6384	0	0	0	1	0	0
360000	江西省	地级市	2006	赣州市	53	赣州	赣州2006	赣州市2006	8.13516	22.7605	13.7306			0	0	0	7.098	0.3843	13.1222	5.22753	0.245281	1.5917	0.60062	2	37.85	214.58	0	0	0	0	0	1	0	1
360000	江西省	地级市	2007	赣州市	53	赣州	赣州2007	赣州市2007	7.31573	17.361	11.3291			0	0	0	8.487	0.3899	16.2286	5.5463	0.485118	1.54555	0.742048	7	37.23	215.39	5	5660	0	0	0	1	0	1
360000	江西省	地级市	2008	赣州市	53	赣州	赣州2008	赣州市2008	8.42893	32.2043	16.788			0	0	0	10.016	0.4059	18.4219	6.64374	0.469922	1.56621	0.923204	5	36.24	215.51	15	5426	0	0	0	1	0	1
360000	江西省	地级市	2009	赣州市	53	赣州	赣州2009	赣州市2009	19.5236	14.6133	16.9055			0	0	0	11.201	0.4103	20.562	7.23833	0.543175	1.86875	1.16042	9	36.92	216.16	18	5387	0	0	0	1	0	1
360000	江西省	地级市	2010	赣州市	53	赣州	赣州2010	赣州市2010	17.9143	16.7093	17.3022			0	0	0	13.322	0.4243	23.6006	7.05591	0.41792	2.10089	1.4126	19	36.72	217.8	22	5929	0	0	0	1	0	1
360000	江西省	地级市	2011	赣州市	53	赣州	赣州2011	赣州市2011	20.1813	9.75111	14.0927			0	0	0	15.895	0.4501	27.8509	8.23735	0.401781	2.15795	1.7374	23	35.34	217.92	22	6244	0	0	0	1	0	1
360000	江西省	地级市	2012	赣州市	53	赣州	赣州2012	赣州市2012	22.7074	13.6586	17.6601			0	0	0	17.873	0.488	32.8723	9.36551	0.370741	2.35463	2.05968	30	37.08	220.35	19	5941	0	0	1	1	0	1
360000	江西省	地级市	2013	赣州市	53	赣州	赣州2013	赣州市2013	24.225	12.7984	17.6855			0	0	0	18.012	0.543	40.9238	11.0181	0.942226	2.5203	2.36932	59	38.36	222.38	34	5642	0	0	1	1	0	1
360000	江西省	地级市	2014	赣州市	53	赣州	赣州2014	赣州市2014	25.3967	14.4718	19.2423			0	0	0	21.708	0.55309	45.1125	12.2213	1.13735	2.60673	2.60313	104	38.92	223.59	19	5186	0	0	1	1	0	1
360000	江西省	地级市	2015	赣州市	53	赣州	赣州2015	赣州市2015	26.012	17.6243	21.4533			0	0	0	23.148	0.57876	50.313	12.4381	1.35591	2.86415	2.83398	141	40.93	225.96	30	5149	0	0	1	1	0	1
360000	江西省	地级市	2016	赣州市	53	赣州	赣州2016	赣州市2016	25.9611	18.6723	22.0489			0	0	0	25.761	0.57718	55.253	11.0176	1.86309	3.16421	3.13535	253	43.21	228.06	16	5994	0	0	1	1	0	1
360000	江西省	地级市	2017	赣州市	53	赣州	赣州2017	赣州市2017	8.8121	18.5305	12.8346			0	0	0	29.095	0.56569	60.337	9.7864	2.37207	3.25841	3.52123	322			26	5774	0	0	1	1	0	1
360000	江西省	地级市	2018	赣州市	53	赣州	赣州2018	赣州市2018	10.3074	16.4356	13.0384			0	0	0	32.429	0.54353	66.875	9.44755	2.59592	3.2451	3.93559	604	45.34	233.22	19	5886	0	0	1	1	0	1
360000	江西省	地级市	2019	赣州市	53	赣州	赣州2019	赣州市2019	10.235	20.3361	14.4877			0	0	0	39.968	0.56596	70.64	8.07046	2.73271	2.95171	4.42872	493	49.79	238.96	17	7425	0	1	1	1	0	1
360000	江西省	地级市	2020	赣州市	53	赣州	赣州2020	赣州市2020	9.88818	19.5085	13.9441			0	0	0	40.754	0.56216	75.085	7.84139	3.03167	3.23011	4.87862	688	50.51	239.14	17	7406	0	1	1	1	0	1
640000	宁夏回族自治区	地级市	2006	固原市	54	固原	固原2006	固原市2006	4.28429	2.44244	3.2369			0	0	0	6.1	0.0645	16.4631	3.21157	0.282749	1.58448	0		52.34	225.34	1	2506	0	0	0	0	0	1
640000	宁夏回族自治区	地级市	2007	固原市	54	固原	固原2007	固原市2007	2.3524	1.87896	2.10254			0	0	0	6.1	0.0645	19.894	3.36766	0.505029	1.62054	0		51.74	223.61	3	2276	0	0	0	0	0	1
640000	宁夏回族自治区	地级市	2008	固原市	54	固原	固原2008	固原市2008	1.91643	1.4934	1.69185			0	0	0	6.1	0.0645	26.5345	3.45705	0.725318	1.56184	0		51.08	223.11	4	1586	0	0	0	0	0	1
640000	宁夏回族自治区	地级市	2009	固原市	54	固原	固原2009	固原市2009	1.8089	1.53284	1.66521			0	0	0	6.1	0.0645	29.3069	4.01351	0.577659	2.00546	0	1	49.72	222.27	4	1823	0	0	0	0	0	1
640000	宁夏回族自治区	地级市	2010	固原市	54	固原	固原2010	固原市2010	1.70298	2.03766	1.86289			0	0	0	6.874	0.0645	33.4684	5.05436	0.491337	1.69504	0		50.05	221.13	22	6182	0	0	0	0	0	1
640000	宁夏回族自治区	地级市	2011	固原市	54	固原	固原2011	固原市2011	1.58426	0.83482	1.15037			0	0	0	10.785	0.0645	41.3899	5.96566	0.37417	2.15371	0	5	47.79	222.62	40	8234	0	0	0	0	0	1
640000	宁夏回族自治区	地级市	2012	固原市	54	固原	固原2012	固原市2012	0.71116	1.43219	0.894721			0	0	0	12.619	0.0645	45.6534	6.52207	0.345458	2.2534	0		49.26	225.22	28	6908	0	0	0	0	0	1
640000	宁夏回族自治区	地级市	2013	固原市	54	固原	固原2013	固原市2013	0.71116	2.92551	1.4451			0	0	0	11.88	0.0645	45.8515	7.13675	0.457142	2.36777	0	4	49.32	224.86	27	6596	0	0	0	0	0	1
640000	宁夏回族自治区	地级市	2014	固原市	54	固原	固原2014	固原市2014	0.9431	3.07088	1.7044			0	0	0	16.268	0.06533	46.4772	7.60836	0.362883	2.4454	0	4	50.71	228.91	19	5311	0	0	0	0	0	1
640000	宁夏回族自治区	地级市	2015	固原市	54	固原	固原2015	固原市2015	1.58011	4.62688	2.70927			0	0	0	17.796	0.06644	63.821	7.3302	0.26237	2.54506	0	11	51.96	231.12	13	5533	0	0	0	0	0	1
640000	宁夏回族自治区	地级市	2016	固原市	54	固原	固原2016	固原市2016	1.1244	4.18725	2.17509			0	0	0	19.72	0.06795	71.168	9.38363	0.245008	3.00265	0	15	54.04	233.57	29	5916	0	0	0	0	0	1
640000	宁夏回族自治区	地级市	2017	固原市	54	固原	固原2017	固原市2017	3.82666	7.53385	5.37759			0	0	0	22.061	0.06919	77.723	6.17579	0.301862	3.24868	0	5			38	7439	0	0	0	0	0	1
640000	宁夏回族自治区	地级市	2018	固原市	54	固原	固原2018	固原市2018	5.35275	8.47239	6.74022			0	0	0	24.544	0.07016	86.891	5.69272	0.431233	2.91487	0	24	53.04	233.97	19	5684	0	0	0	0	0	1
640000	宁夏回族自治区	地级市	2019	固原市	54	固原	固原2019	固原市2019	8.54961	11.1116	9.7508			0	0	0	25.886	0.07233	81.025	5.02724	0.454866	2.75436	0	10	62.92	245.12	21	5343	0	0	0	0	0	1
640000	宁夏回族自治区	地级市	2020	固原市	54	固原	固原2020	固原市2020	6.34038	11.6546	8.61322			0	0	0	29.462	0.07361	108.091	4.11568	0.544087	2.7443	0	20	59.94	239.47	18	4754	0	0	0	0	0	1
510000	四川省	地级市	2006	广安市	55	广安	广安2006	广安市2006	69.1544	63.6394	66.3565			0	0	0	7.483	0.1073	14.6494	3.38231	0.118459	1.57329	0	2	36.44	211.43	11	5932	0	0	0	1	0	0
510000	四川省	地级市	2007	广安市	55	广安	广安2007	广安市2007	60.8418	68.7116	64.6917			0	0	0	9.054	0.1101	18.9982	3.41694	0.25559	1.47682	0	4	35.71	210.24	9	5633	0	0	0	1	0	0
510000	四川省	地级市	2008	广安市	55	广安	广安2008	广安市2008	72.4448	78.2683	75.3188			0	0	0	10.862	0.1113	23.2121	3.30425	0.317493	1.44798	0	5	34.68	209.84	15	6685	0	0	0	1	0	0
510000	四川省	地级市	2009	广安市	55	广安	广安2009	广安市2009	102.158	55.8432	76.6881			0	0	0	12.14	0.1125	25.1785	3.59771	0.267026	1.39691	0	10	33.06	210.54	11	6585	0	0	0	1	0	0
510000	四川省	地级市	2010	广安市	55	广安	广安2010	广安市2010	62.2388	76.6736	69.1954			0	0	0	15.588	0.114	29.2161	3.96082	0.286948	1.6575	0	8	31.28	210.82	5	6558	0	0	0	1	0	0
510000	四川省	地级市	2011	广安市	55	广安	广安2011	广安市2011	85.7669	67.0188	76.0073			0	0	0	20.572	0.1162	34.6056	4.20924	0.308907	1.60128	0	8	29.64	210.66	14	7054	0	0	0	1	0	0
510000	四川省	地级市	2012	广安市	55	广安	广安2012	广安市2012	108.844	63.9388	84.499			0	0	0	23.41	0.119	39.9761	4.36064	0.391696	1.69963	0	15	29.19	210.58	11	8628	0	0	0	1	0	0
510000	四川省	地级市	2013	广安市	55	广安	广安2013	广安市2013	85.6731	85.6034	85.6383			0	0	0	17.769	0.13	46.8982	4.62408	0.442998	1.84305	0	21	29.66	211.7	21	5754	0	0	0	1	0	0
510000	四川省	地级市	2014	广安市	55	广安	广安2014	广安市2014	99.0499	94.7051	96.863			0	0	0	28.489	0.13907	50.4047	4.99816	0.413132	1.93577	0	16	30.56	213.64	20	7072	0	0	0	1	0	0
510000	四川省	地级市	2015	广安市	55	广安	广安2015	广安市2015	145.18	87.2969	114.273			0	0	0	31.046	0.15771	44.079	5.63819	0.432167	1.99631	0	15	32.03	215.79	24	7438	0	0	0	1	0	0
510000	四川省	地级市	2016	广安市	55	广安	广安2016	广安市2016	140.214	102.209	120.437			0	0	0	33.13	0.1552	66.034	5.95371	0.332751	2.15006	0	26	32.58	216.8	17	7902	0	0	0	1	0	0
510000	四川省	地级市	2017	广安市	55	广安	广安2017	广安市2017	89.3388	147.371	116.44			0	0	0	36.034	0.32897	69.813	6.06977	0.230626	2.17736	0	44			25	8022	0	0	0	1	0	0
510000	四川省	地级市	2018	广安市	55	广安	广安2018	广安市2018	75.9631	146.838	108.173			0	0	0	38.52	0.32924	77.434	6.40295	0.240319	2.14189	0	52	40.11	226.23	20	5909	0	0	0	1	0	0
510000	四川省	地级市	2019	广安市	55	广安	广安2019	广安市2019	0.71116	0.14192	0.769705			0	0	0	38.522	0.33744	62.055	6.85354	0.320169	2.23882	0	25	50.81	234.54	13	5850	0	0	0	1	0	0
510000	四川省	地级市	2020	广安市	55	广安	广安2020	广安市2020	76.7213	143.88	107.369			0	0	0	40.073	1.03447	71.9175	6.61207	0.229154	2.47853	0	71	49.88	231.8	15	6348	0	0	0	1	0	0
510000	四川省	地级市	2006	广元市	56	广元	广元2006	广元市2006	93.8006	52.7871	71.2841			0	0	0	6.1	0.1441	13.639	3.06983	0.181236	1.96228	0	1	37.91	208.52	29	6544	0	0	0	1	0	1
510000	四川省	地级市	2007	广元市	56	广元	广元2007	广元市2007	84.6155	57.6011	70.2149			0	0	0	6.893	0.1463	16.9995	3.24989	0.533485	1.77638	0	9	35.24	206.2	27	5732	0	0	0	1	0	1
510000	四川省	地级市	2008	广元市	56	广元	广元2008	广元市2008	54.2284	88.5656	69.9485			0	0	0	8.55	0.1517	22.7682	2.78661	0.941808	2.50681	0	15	35.66	205.73	15	5862	0	0	0	1	0	1
510000	四川省	地级市	2009	广元市	56	广元	广元2009	广元市2009	47.66	82.849	63.5229			0	0	0	6.1	0.1577	24.5569	3.78944	0.35004	2.9816	0	6	39.37	212.6	8	5834	0	0	0	1	0	1
510000	四川省	地级市	2010	广元市	56	广元	广元2010	广元市2010	49.6323	83.621	65.061			0	0	0	11.75	0.1422	29.2727	5.19676	0.230843	2.9704	0	4	37.18	213.39	34	5566	0	0	0	1	0	1
510000	四川省	地级市	2011	广元市	56	广元	广元2011	广元市2011	58.6653	81.1716	69.2863			0	0	0	16.225	0.143	35.9848	5.64158	0.52723	2.55412	0	17	34.59	213.84	31	5604	0	0	0	1	0	1
510000	四川省	地级市	2012	广元市	56	广元	广元2012	广元市2012	78.422	79.4652	78.9425			0	0	0	18.627	0.146	40.1519	5.72644	0.530895	2.4861	0	19	33.41	213.82	52	6044	0	0	1	1	0	1
510000	四川省	地级市	2013	广元市	56	广元	广元2013	广元市2013	76.5713	90.9391	83.5577			0	0	0	16.734	0.168	44.5497	5.87221	0.653633	2.60183	0	25	33.71	215.53	47	5737	0	0	1	1	0	1
510000	四川省	地级市	2014	广元市	56	广元	广元2014	广元市2014	104.963	91.1273	97.9011			0	0	0	22.117	0.16792	48.2161	6.14343	0.646469	2.63686	0	23	35.4	218.47	38	6268	0	0	1	1	0	1
510000	四川省	地级市	2015	广元市	56	广元	广元2015	广元市2015	106.15	111.827	108.968			0	0	0	23.263	0.16798	56.946	6.74192	0.497803	2.78506	0	45	36.36	219.88	26	6561	0	0	1	1	0	1
510000	四川省	地级市	2016	广元市	56	广元	广元2016	广元市2016	125.085	112.154	118.527			0	0	0	25.072	0.16866	64.237	6.14629	0.495354	2.93092	0	47	37.3	221.19	14	3100	0	0	1	1	0	1
510000	四川省	地级市	2017	广元市	56	广元	广元2017	广元市2017	119.609	124.888	121.9			0	0	0	27.653	0.17269	68.646	6.00878	0.391979	2.9269	0	45			31	5320	0	0	1	1	0	1
510000	四川省	地级市	2018	广元市	56	广元	广元2018	广元市2018	109.952	121.761	115.777			0	0	0	30.105	0.17186	74.338	5.94758	0.318828	2.86162	0	68	40.56	225.85	33	5650	0	0	1	1	0	1
510000	四川省	地级市	2019	广元市	56	广元	广元2019	广元市2019	113.73	114.871	114.3			0	0	0	35.262	0.18029	82.02	5.14712	0.347528	2.63406	0	29	42.37	226.09	21	5909	0	0	1	1	0	1
510000	四川省	地级市	2020	广元市	56	广元	广元2020	广元市2020	82.9407	139.172	109.053			0	0	0	43.337	0.16548	79.873	5.21982	0.280377	2.68171	0	49	42.46	223.91	13	6362	0	0	1	1	0	1
440000	广东省	副省级市	2017	广州市	57	广州	广州2017	广州市2017	42.0447	21.0868	30.0305	2010	7	1	1	1	150.678	3.2917	98.612	7.14656	7.58828	3.8434	63.3821	3649			15	8753	1	1	1	1	1	0
440000	广东省	副省级市	2006	广州市	57	广州	广州2006	广州市2006	46.5333	17.7184	29.1861	2010	4	1	0	0	63.1	2.0716	36.7696	7.03153	0.519624	3.40198	10.8112	312	57.6	255.21	15	7510	1	0	0	1	1	0
440000	广东省	副省级市	2007	广州市	57	广州	广州2007	广州市2007	42.1502	15.1347	25.6719	2010	3	1	0	0	71.808	2.2369	40.561	7.36774	3.39249	3.43849	13.3569	421	58.41	256.3	21	6190	1	0	0	1	1	0
440000	广东省	副省级市	2008	广州市	57	广州	广州2008	广州市2008	14.2385	28.4661	20.2516	2010	6	1	0	0	81.233	2.2554	45.702	7.56876	3.67579	3.40916	16.6177	484	59.02	256.98	34	6613	1	0	0	1	1	0
440000	广东省	副省级市	2009	广州市	57	广州	广州2009	广州市2009	40.2911	17.0571	26.5264	2010	-1	1	0	0	89.082	2.3515	49.5181	7.68917	4.09693	3.80775	20.8876	657	60.85	258.96	23	7543	1	0	0	1	1	0
440000	广东省	副省级市	2010	广州市	57	广州	广州2010	广州市2010	41.3773	18.1559	27.7197	2010	0	1	1	1	103.625	2.4637	54.4941	8.11894	3.26791	3.74369	25.4268	866	61.01	259.26	34	8129	1	0	0	1	1	0
440000	广东省	副省级市	2011	广州市	57	广州	广州2011	广州市2011	17.7666	19.6799	18.701	2010	1	1	1	1	97.588	3.1024	57.4736	7.88413	1.8819	3.39078	31.2732	1279	61.51	259.86	29	8063	1	0	0	1	1	0
440000	广东省	副省级市	2012	广州市	57	广州	广州2012	广州市2012	40.5557	18.5908	27.7376	2010	2	1	1	1	105.909	3.269	67.515	8.13504	3.87874	3.47054	37.0743	1305	63.59	262.03	49	8733	1	0	1	1	1	0
440000	广东省	副省级市	2013	广州市	57	广州	广州2013	广州市2013	45.4597	17.6013	28.7292	2010	-3	1	1	1	159.322	3.246	73.7497	7.40463	3.90952	3.62217	42.6478	2029	64.62	263.14	19	5934	1	0	1	1	1	0
440000	广东省	副省级市	2014	广州市	57	广州	广州2014	广州市2014	48.6138	18.4337	30.4524	2010	-4	1	1	1	128.478	3.26398	74.2461	7.44067	3.92148	3.57344	46.8563	2155	65.23	263.94	20	5853	1	0	1	1	1	0
440000	广东省	副省级市	2015	广州市	57	广州	广州2015	广州市2015	45.2557	21.3929	31.4435	2010	-5	1	1	1	136.188	3.20313	81.171	7.45549	5.13213	3.87504	51.0116	2812	67.11	264.94	20	5731	1	1	1	1	1	0
440000	广东省	副省级市	2016	广州市	57	广州	广州2016	广州市2016	44.2929	23.027	32.1985	2010	-2	1	1	1	141.933	3.25234	89.096	7.12955	5.81118	3.82776	56.4363	3649	68.67	264.94	17	5106	1	1	1	1	1	0
440000	广东省	副省级市	2018	广州市	57	广州	广州2018	广州市2018	38.0782	21.9964	29.0926	2010	8	1	1	1	155.491	3.48645	108.091	7.14904	6.53047	4.04263	67.8847	3649	68.67	264.94	12	9906	1	1	1	1	1	0
440000	广东省	副省级市	2019	广州市	57	广州	广州2019	广州市2019	14.394	34.2024	22.4152	2010	9	1	1	1	156.427	4.00218	108.091	7.19048	7.58828	4.35302	67.8847	3649	68.67	264.94	14	7338	1	1	1	1	1	0
440000	广东省	副省级市	2020	广州市	57	广州	广州2020	广州市2020	44.0865	25.451	33.699	2010	10	1	1	1	135.047	4.19364	108.091	6.88592	7.58828	4.76242	67.8847	3649	68.67	264.94	8	7745	1	1	1	1	1	0
450000	广西壮族自治区	地级市	2006	贵港市	58	贵港	贵港2006	贵港市2006	16.2731	55.3538	30.857			0	0	0	6.1	0.1442	13.8445	4.13501	0.118459	1.33101	0	3	38.12	211.31	6	6268	0	0	0	1	0	0
450000	广西壮族自治区	地级市	2007	贵港市	58	贵港	贵港2007	贵港市2007	11.7542	59.7299	27.7073			0	0	0	8.038	0.1458	18.1665	3.63534	0.516265	1.21142	0	1	35.43	209.64	9	5462	0	0	0	1	0	0
450000	广西壮族自治区	地级市	2008	贵港市	58	贵港	贵港2008	贵港市2008	15.808	95.8965	42.1952			0	0	0	9.386	0.1504	20.5359	3.92063	0.236295	1.26131	0	1	35.27	211.07	8	5423	0	0	0	1	0	0
450000	广西壮族自治区	地级市	2009	贵港市	58	贵港	贵港2009	贵港市2009	10.8877	77.4981	31.2572			0	0	0	10.215	0.1504	22.387	4.46048	0.196924	1.49961	0	2	36.23	214.07	13	6280	0	0	0	1	0	0
450000	广西壮族自治区	地级市	2010	贵港市	58	贵港	贵港2010	贵港市2010	8.09616	60.3311	23.4494			0	0	0	12.531	0.1531	26.2016	3.93646	0.170927	1.45555	0	5	34.58	214.74	12	6213	0	0	0	1	0	0
450000	广西壮族自治区	地级市	2011	贵港市	58	贵港	贵港2011	贵港市2011	7.54783	48.1897	19.9113			0	0	0	15.245	0.156	28.2211	3.43834	0.331396	1.49444	0	6	36.07	214.07	18	6904	0	0	0	1	0	0
450000	广西壮族自治区	地级市	2012	贵港市	58	贵港	贵港2012	贵港市2012	10.6634	56.9441	25.7611			0	0	0	16.281	0.16	29.9985	3.91254	0.451749	1.64237	0	6	37.86	215.97	5	5394	0	0	0	1	0	0
450000	广西壮族自治区	地级市	2013	贵港市	58	贵港	贵港2013	贵港市2013	10.5817	45.1988	22.5183			0	0	0	13.792	0.182	37.2727	4.20779	0.715633	1.74896	0	25	37.45	215.77	7	5101	0	0	0	1	0	0
450000	广西壮族自治区	地级市	2014	贵港市	58	贵港	贵港2014	贵港市2014	10.4901	62.7075	27.0468			0	0	0	19.004	0.18669	41.3036	4.52589	0.727333	1.80367	0	17	39.62	219.67	18	4715	0	0	0	1	0	0
450000	广西壮族自治区	地级市	2015	贵港市	58	贵港	贵港2015	贵港市2015	13.7957	79.2703	35.274			0	0	0	20.24	0.18705	52.653	4.9199	0.624693	1.81421	0	21	39.61	219.5	25	5427	0	0	0	1	0	0
450000	广西壮族自治区	地级市	2016	贵港市	58	贵港	贵港2016	贵港市2016	16.8404	75.9065	37.6049			0	0	0	22.23	0.18441	55.121	4.96679	0.19958	1.85008	0	27	39.15	219.31	24	6157	0	0	0	1	0	0
450000	广西壮族自治区	地级市	2017	贵港市	58	贵港	贵港2017	贵港市2017	9.066	80.0042	29.3446			0	0	0	24.857	0.18605	61.245	4.65813	0.136796	1.91907	0	33			15	5464	0	0	0	1	0	0
450000	广西壮族自治区	地级市	2018	贵港市	58	贵港	贵港2018	贵港市2018	8.32572	70.4039	26.072			0	0	0	26.635	0.1763	67.934	4.89135	0.208335	1.99165	0	51	40.83	223.89	27	6230	0	0	0	1	0	0
450000	广西壮族自治区	地级市	2019	贵港市	58	贵港	贵港2019	贵港市2019	6.87006	57.5874	21.1332			0	0	0	28.451	0.17962	73.816	4.98307	0.575009	2.09261	0	42	46.29	229.09	5	5394	0	0	0	1	0	0
450000	广西壮族自治区	地级市	2020	贵港市	58	贵港	贵港2020	贵港市2020	8.19435	57.883	23.0109			0	0	0	31.363	0.20998	77.986	5.56311	0.712308	2.26204	0	72	46.86	230.08	27	7609	0	0	0	1	0	0
520000	贵州省	地级市	2017	贵阳市	59	贵阳	贵阳2017	贵阳市2017	22.0388	44.5645	31.6328	2010	7	1	1	1	74.493	1.09064	73.939	10.6798	2.8592	5.99714	5.28184	625			31	7443	0	0	1	1	1	1
520000	贵州省	地级市	2006	贵阳市	59	贵阳	贵阳2006	贵阳市2006	26.5213	20.5048	23.3415	2010	4	1	0	0	17.025	0.6056	18.5222	10.2142	0.290475	4.47353	0.90093	50	45.32	239.03	34	9077	0	0	0	1	1	1
520000	贵州省	地级市	2007	贵阳市	59	贵阳	贵阳2007	贵阳市2007	28.4592	27.0062	27.7244	2010	3	1	0	0	19.489	0.6622	22.5787	10.9433	2.07933	4.39943	1.11307	86	47.02	240.45	23	9817	0	0	0	1	1	1
520000	贵州省	地级市	2008	贵阳市	59	贵阳	贵阳2008	贵阳市2008	32.3578	29.9346	31.1261	2010	6	1	0	0	20.638	0.6638	26.3861	10.972	1.90601	4.46155	1.38481	108	47.21	241.39	36	9281	0	0	0	1	1	1
520000	贵州省	地级市	2009	贵阳市	59	贵阳	贵阳2009	贵阳市2009	28.9244	26.7398	27.8135	2010	-1	1	0	0	24.585	0.6856	27.5791	10.8406	1.69916	4.65541	1.74063	98	54.2	249.05	28	10045	0	0	0	1	1	1
520000	贵州省	地级市	2010	贵阳市	59	贵阳	贵阳2010	贵阳市2010	25.0136	28.8966	26.8941	2010	0	1	1	1	26.057	0.7034	31.1285	12.1502	1.76509	5.01333	2.1189	167	54.18	249.09	46	8761	0	0	1	1	1	1
520000	贵州省	地级市	2011	贵阳市	59	贵阳	贵阳2011	贵阳市2011	22.6521	24.405	23.5141	2010	1	1	1	1	31.712	0.7652	38.673	13.5274	1.82154	4.78392	2.6061	216	53.05	248.53	45	10220	0	0	1	1	1	1
520000	贵州省	地级市	2012	贵阳市	59	贵阳	贵阳2012	贵阳市2012	29.0616	35.8091	32.2863	2010	2	1	1	1	38.447	0.827	42.662	14.1852	1.88559	4.63084	3.08952	203	53.56	249.31	62	9413	0	0	1	1	1	1
520000	贵州省	地级市	2013	贵阳市	59	贵阳	贵阳2013	贵阳市2013	25.1677	27.9944	26.5482	2010	-3	1	1	1	55.024	0.977	50.8199	13.2926	2.379	4.75683	3.55398	349	55.4	251.49	37	6162	0	0	1	1	1	1
520000	贵州省	地级市	2014	贵阳市	59	贵阳	贵阳2014	贵阳市2014	29.0185	40.6636	34.4305	2010	-4	1	1	1	55.018	1.03865	59.3305	13.2784	2.75849	5.42701	3.90469	423	56.57	252.26	38	7763	0	0	1	1	1	1
520000	贵州省	地级市	2015	贵阳市	59	贵阳	贵阳2015	贵阳市2015	23.1926	51.0298	34.8457	2010	-5	1	1	1	63.003	1.04019	63.949	12.9411	2.89036	5.75817	4.25096	520	57.17	252.68	25	6890	0	0	1	1	1	1
520000	贵州省	地级市	2016	贵阳市	59	贵阳	贵阳2016	贵阳市2016	17.7138	46.6099	29.2086	2010	-2	1	1	1	67.772	1.05745	70.535	11.6008	3.28638	6.04285	4.70303	476	57.06	252.72	37	8216	0	0	1	1	1	1
520000	贵州省	地级市	2018	贵阳市	59	贵阳	贵阳2018	贵阳市2018	24.3663	41.3761	31.9209	2010	8	1	1	1	78.449	1.06328	82.685	10.8291	3.96966	6.25786	5.90338	997	58.75	254.72	30	7234	0	0	1	1	1	1
520000	贵州省	地级市	2019	贵阳市	59	贵阳	贵阳2019	贵阳市2019	25.4706	40.6783	32.3239	2010	9	1	1	1	81.995	1.0782	92.65	10.3282	3.95888	6.4341	6.64308	812	58.98	254.97	15	7886	0	0	1	1	1	1
520000	贵州省	地级市	2020	贵阳市	59	贵阳	贵阳2020	贵阳市2020	27.4055	44.1648	34.9538	2010	10	1	1	1	72.246	1.13268	101.829	9.23302	3.79395	6.44195	7.31793	1074	59.86	255.75	20	7220	0	0	1	1	1	1
450000	广西壮族自治区	地级市	2006	桂林市	60	桂林	桂林2006	桂林市2006	24.9574	51.7539	36.351			0	0	0	12.209	0.3143	17.6134	4.892	0.331788	1.54939	0.60062	24	36.79	214.8	18	7764	0	0	0	1	0	1
450000	广西壮族自治区	地级市	2007	桂林市	60	桂林	桂林2007	桂林市2007	24.6727	54.1258	37.0384			0	0	0	14.828	0.313	21.2407	4.87918	1.22128	1.44713	0.742048	33	36.18	214.98	10	4227	0	0	0	1	0	1
450000	广西壮族自治区	地级市	2008	桂林市	60	桂林	桂林2008	桂林市2008	44.4587	79.2162	60.0169			0	0	0	17.435	0.3103	24.845	5.11745	1.06497	1.43442	0.923204	40	35.34	215.92	23	5740	0	0	0	1	0	1
450000	广西壮族自治区	地级市	2009	桂林市	60	桂林	桂林2009	桂林市2009	30.1631	67.5663	45.9305			0	0	0	18.443	0.3131	27.8439	5.86362	1.12438	1.87473	1.16042	44	37.34	218.48	25	7792	0	0	0	1	0	1
450000	广西壮族自治区	地级市	2010	桂林市	60	桂林	桂林2010	桂林市2010	30.3203	50.87	39.517			0	0	0	22.842	0.3159	30.8278	6.07837	1.03502	1.96275	1.4126	57	36.96	218.52	31	8695	0	0	0	1	0	1
450000	广西壮族自治区	地级市	2011	桂林市	60	桂林	桂林2011	桂林市2011	29.9446	40.2063	34.7599			0	0	0	23.786	0.3427	34.0817	6.04371	1.13433	1.84461	1.7374	79	35	216.69	35	6766	0	0	0	1	0	1
450000	广西壮族自治区	地级市	2012	桂林市	60	桂林	桂林2012	桂林市2012	34.3993	47.3222	40.4436			0	0	0	30.849	0.36	37.4657	7.13853	1.20567	1.93039	2.05968	94	34.73	216.44	32	8896	0	0	1	1	0	1
450000	广西壮族自治区	地级市	2013	桂林市	60	桂林	桂林2013	桂林市2013	31.1092	38.212	34.5079			0	0	0	31.761	0.426	41.7711	6.69529	1.50031	1.98611	2.36932	118	34.11	216.03	34	8524	0	0	1	1	0	1
450000	广西壮族自治区	地级市	2014	桂林市	60	桂林	桂林2014	桂林市2014	36.7966	51.3062	43.5713			0	0	0	37.288	0.43389	46.6735	6.78065	1.46286	2.00285	2.60313	158	34.97	217.29	31	7486	0	0	1	1	0	1
450000	广西壮族自治区	地级市	2015	桂林市	60	桂林	桂林2015	桂林市2015	47.2666	62.3451	54.4137			0	0	0	39.329	0.44387	53.925	6.92373	0.934142	2.14305	2.83398	151	36.16	218.69	57	9181	0	0	1	1	0	1
450000	广西壮族自治区	地级市	2016	桂林市	60	桂林	桂林2016	桂林市2016	40.659	63.9457	51.2974			0	0	0	41.216	0.42715	59.129	7.07244	0.89467	2.346	3.13535	224	37.8	220.2	58	8758	0	0	1	1	0	1
450000	广西壮族自治区	地级市	2017	桂林市	60	桂林	桂林2017	桂林市2017	18.8228	74.7493	39.1931			0	0	0	40.632	0.41958	65.694	7.04875	0.589169	2.64577	3.52123	214			38	9421	0	0	1	1	0	1
450000	广西壮族自治区	地级市	2018	桂林市	60	桂林	桂林2018	桂林市2018	17.0902	66.0702	34.9037			0	0	0	39.507	0.39036	73.226	7.52914	0.583952	2.97227	3.93559	289	49.32	229.68	30	8174	0	0	1	1	0	1
450000	广西壮族自治区	地级市	2019	桂林市	60	桂林	桂林2019	桂林市2019	14.8745	54.1617	29.2314			0	0	0	41.294	0.39547	78.252	7.25512	0.550762	3.05445	4.42872	164	54.31	231.15	37	9408	0	0	1	1	0	1
450000	广西壮族自治区	地级市	2020	桂林市	60	桂林	桂林2020	桂林市2020	17.372	53.9533	31.3614			0	0	0	42.424	0.38662	82.096	5.2343	0.585663	3.4038	4.87862	237	54.41	231.64	39	8202	0	0	1	1	0	1
230000	黑龙江省	副省级市	2017	哈尔滨市	61	哈尔	哈尔2017	哈尔滨市2017	9.95253	3.19146	5.6621	2010	7	1	1	1	57.193	1.2802	67.542	5.88292	0.912133	3.27318	40.4941	1239			12	8112	0	0	0	1	1	0
230000	黑龙江省	副省级市	2006	哈尔滨市	61	哈尔	哈尔2006	哈尔滨市2006	13.1509	0.66501	3.01636	2010	4	1	0	0	21.374	1.49	18.7797	5.64896	0.458127	2.49605	6.90713	178	48.27	233.35	22	5968	0	0	0	1	1	0
230000	黑龙江省	副省级市	2007	哈尔滨市	61	哈尔	哈尔2007	哈尔滨市2007	11.4382	0.53721	2.52278	2010	3	1	0	0	24.768	1.4834	22.104	5.41896	2.65488	2.34897	8.53355	258	48.69	234.42	11	4707	0	0	0	1	1	0
230000	黑龙江省	副省级市	2008	哈尔滨市	61	哈尔	哈尔2008	哈尔滨市2008	11.4818	1.17055	3.71505	2010	6	1	0	0	29.012	1.4546	25.5257	5.7181	2.40614	2.30512	10.6168	296	48.82	235.21	23	6649	0	0	0	1	1	0
230000	黑龙江省	副省级市	2009	哈尔滨市	61	哈尔	哈尔2009	哈尔滨市2009	9.11494	1.17074	3.2974	2010	-1	1	0	0	32.053	1.4404	29.2507	6.08904	1.81265	2.66551	13.3449	345	51.28	238.73	19	6750	0	0	0	1	1	0
230000	黑龙江省	副省级市	2010	哈尔滨市	61	哈尔	哈尔2010	哈尔滨市2010	7.99164	1.70665	3.71441	2010	0	1	1	1	36.951	1.3517	32.4111	6.49802	1.97276	2.75135	16.2449	438	50.96	239.7	23	6066	0	0	0	1	1	0
230000	黑龙江省	副省级市	2011	哈尔滨市	61	哈尔	哈尔2011	哈尔滨市2011	7.96387	1.91399	3.92435	2010	1	1	1	1	42.736	1.3134	36.4499	7.07934	2.06506	2.69321	19.9801	533	50.63	240.09	20	8496	0	0	0	1	1	0
230000	黑龙江省	副省级市	2012	哈尔滨市	61	哈尔	哈尔2012	哈尔滨市2012	6.79876	2.18271	3.86449	2010	2	1	1	1	45.81	1.383	41.773	7.79559	1.98743	2.83906	23.6863	619	52.84	241.7	19	7193	0	0	0	1	1	0
230000	黑龙江省	副省级市	2013	哈尔滨市	61	哈尔	哈尔2013	哈尔滨市2013	6.70561	2.67904	4.24804	2010	-3	1	1	1	50.423	1.374	47.2103	8.01827	1.6788	2.94279	27.2472	875	53.54	241.84	21	6872	0	0	0	1	1	0
230000	黑龙江省	副省级市	2014	哈尔滨市	61	哈尔	哈尔2014	哈尔滨市2014	8.68678	2.16605	4.36129	2010	-4	1	1	1	53.872	1.36303	51.5541	7.93099	1.35494	3.0227	29.9359	803	54.86	243.13	18	7617	0	0	0	1	1	0
230000	黑龙江省	副省级市	2015	哈尔滨市	61	哈尔	哈尔2015	哈尔滨市2015	8.85975	2.04004	4.2768	2010	-5	1	1	1	59.027	1.33307	58.405	7.08951	1.10148	3.16123	32.5907	975	55.92	244.23	14	7671	0	0	0	1	1	0
230000	黑龙江省	副省级市	2016	哈尔滨市	61	哈尔	哈尔2016	哈尔滨市2016	9.77622	2.14085	4.60645	2010	-2	1	1	1	63.445	1.30397	62.583	6.16622	0.871317	3.0898	36.0565	1235	57.59	246.26	29	8052	0	0	0	1	1	0
230000	黑龙江省	副省级市	2018	哈尔滨市	61	哈尔	哈尔2018	哈尔滨市2018	10.0413	3.79169	6.19323	2010	8	1	1	1	66.094	1.20988	71.771	6.1006	1.24487	3.55929	45.2592	1245	64.85	256.51	17	7431	0	0	0	1	1	0
230000	黑龙江省	地级市	2019	哈尔滨市	61	哈尔	哈尔2019	哈尔滨市2019	10.0515	4.27234	6.57291	2010	9	1	1	1	55.175	1.04665	82.385	7.06623	1.41949	4.63014	50.9303	774	67.68	256.85	13	6778	0	0	0	1	1	0
230000	黑龙江省	地级市	2020	哈尔滨市	61	哈尔	哈尔2020	哈尔滨市2020	7.80908	4.29189	5.79677	2010	10	1	1	1	54.57	1.07052	84.796	6.5503	1.09211	5.07381	56.1042	1106	66.05	254.17	8	7386	0	0	0	1	1	0
460000	海南省	地级市	2006	海口市	62	海口	海口2006	海口市2006	50.8855	8.08681	21.2188	2010	4	1	0	0	19.98	0.8817	21.385	6.03465	0.215845	5.06867	0.30031	9	63.42	256.01	14	7862	0	0	0	1	1	0
460000	海南省	地级市	2007	海口市	62	海口	海口2007	海口市2007	52.793	7.48534	20.9038	2010	3	1	0	0	22.109	0.2825	25.7225	11.3922	1.17531	5.11361	0.371024	16	64.96	258.15	11	6331	0	0	0	1	1	0
460000	海南省	地级市	2008	海口市	62	海口	海口2008	海口市2008	50.5562	7.06725	19.8439	2010	6	1	0	0	24.42	0.2887	27.3276	7.00195	1.29327	5.53158	0.461602	18	67.35	260.25	10	5065	0	0	0	1	1	0
460000	海南省	地级市	2009	海口市	62	海口	海口2009	海口市2009	39.4625	8.8854	19.2299	2010	-1	1	0	0	26.366	0.311	30.639	7.85241	1.01063	6.44195	0.580211	32	68.57	261.61	10	6038	0	0	0	1	1	0
460000	海南省	地级市	2010	海口市	62	海口	海口2010	海口市2010	37.2073	7.54019	17.2174	2010	0	1	1	1	30.329	0.3309	34.192	8.46284	1.2207	6.44195	0.7063	38	68.67	263.16	23	5627	0	0	0	1	1	0
460000	海南省	地级市	2011	海口市	62	海口	海口2011	海口市2011	36.3887	6.73372	16.1141	2010	1	1	1	1	35.669	0.4385	38.0598	8.54228	1.36372	6.44195	0.8687	43	68.37	261.68	14	5530	0	0	0	1	1	0
460000	海南省	地级市	2012	海口市	62	海口	海口2012	海口市2012	29.2376	7.17789	14.7535	2010	2	1	1	1	38.634	0.45	40.4855	8.93658	1.41104	6.11752	1.02984	65	68.54	261.71	7	5045	0	0	0	1	1	0
460000	海南省	地级市	2013	海口市	62	海口	海口2013	海口市2013	46.8276	9.05788	21.3461	2010	-3	1	1	1	55.499	0.486	45.4106	9.58755	1.46313	6.01524	1.18466	129	68.67	263.17	19	5849	0	0	0	1	1	0
460000	海南省	地级市	2014	海口市	62	海口	海口2014	海口市2014	42.9085	8.66426	19.9034	2010	-4	1	1	1	49.943	0.51276	50.6525	9.17076	0.689504	5.58963	1.30156	94	68.67	264.94	8	5822	0	0	1	1	1	0
460000	海南省	地级市	2015	海口市	62	海口	海口2015	海口市2015	28.4276	7.64734	14.9842	2010	-5	1	1	1	52.534	0.49162	57.455	9.59617	0.484634	6.44195	1.41699	137	68.67	264.94	16	5663	0	0	1	1	1	0
460000	海南省	地级市	2016	海口市	62	海口	海口2016	海口市2016	32.7528	27.5636	30.0624	2010	-2	1	1	1	56.315	0.51416	62.03	9.18419	1.40599	6.44195	1.56767	194	68.67	264.94	26	7470	0	0	1	1	1	0
460000	海南省	地级市	2018	海口市	62	海口	海口2018	海口市2018	38.7922	31.1467	34.7942	2010	8	1	1	1	66.042	0.5061	77.632	11.2465	1.04912	6.42214	1.96779	343	68.67	264.94	16	5720	0	0	1	1	1	0
460000	海南省	地级市	2019	海口市	62	海口	海口2019	海口市2019	32.2129	37.5311	34.7871	2010	9	1	1	1	72.218	0.53085	85.121	11.0851	0.891281	6.09823	2.21436	350	68.67	264.94	18	6805	0	0	1	1	1	0
460000	海南省	地级市	2020	海口市	62	海口	海口2020	海口市2020	32.4194	37.2383	34.7591	2010	10	1	1	1	63.309	0.56072	90.277	10.3824	0.828699	6.02093	2.43931	559	68.67	264.94	9	7985	0	0	1	1	1	0
460000	海南省	地级市	2017	海口市	62	海口	海口2017	海口市2017	44.2937	30.7844	37.0328	2010	7	1	1	1	61.589	0.52155	68.037	9.01528	0.530864	6.44195	1.76061	190			31	7980	0	0	1	1	1	0
130000	河北省	地级市	2006	邯郸市	63	邯郸	邯郸2006	邯郸市2006	16.2744	0.97401	4.07496			0	0	0	15.642	0.5936	15.3612	3.88492	0.195419	1.4149	1.20124	28	35.19	222.48	25	6627	0	0	0	1	0	1
130000	河北省	地级市	2007	邯郸市	63	邯郸	邯郸2007	邯郸市2007	23.4496	0.35877	3.03538			0	0	0	18.406	0.5745	18.2151	4.31923	1.20951	1.27196	1.4841	28	34.44	221.46	27	6837	0	0	0	1	0	1
130000	河北省	地级市	2008	邯郸市	63	邯郸	邯郸2008	邯郸市2008	22.3078	3.84076	9.43294			0	0	0	22.651	0.5595	23.6547	3.89168	1.15174	1.16906	1.84641	26	33.32	221.75	26	8425	0	0	0	1	0	1
130000	河北省	地级市	2009	邯郸市	63	邯郸	邯郸2009	邯郸市2009	26.321	1.038	5.45362			0	0	0	22.779	0.5485	27.6179	4.32575	1.01885	1.47983	2.32084	37	33.86	221.61	25	6835	0	0	0	1	0	1
130000	河北省	地级市	2010	邯郸市	63	邯郸	邯郸2010	邯郸市2010	21.5658	1.47989	5.81764			0	0	0	26.143	0.5657	32.126	4.90767	0.815182	1.461	2.8252	63	32.75	219.71	19	7884	0	0	0	1	0	1
130000	河北省	地级市	2011	邯郸市	63	邯郸	邯郸2011	邯郸市2011	1.43379	2.8092	2.00809			0	0	0	30.27	0.5844	36.1196	5.69913	0.812431	1.44354	3.4748	85	32.66	220.09	21	6762	0	0	0	1	0	1
130000	河北省	地级市	2012	邯郸市	63	邯郸	邯郸2012	邯郸市2012	22.766	3.32058	8.88419			0	0	0	32.65	0.645	37.9875	6.10559	1.27957	1.5758	4.11936	103	33.71	221	13	6328	0	0	0	1	0	1
130000	河北省	地级市	2013	邯郸市	63	邯郸	邯郸2013	邯郸市2013	14.3212	4.74112	8.29279			0	0	0	30.8	0.804	39.0409	5.63943	1.47096	1.80515	4.73864	140	35.76	222.86	13	6384	0	0	0	1	0	1
130000	河北省	地级市	2014	邯郸市	63	邯郸	邯郸2014	邯郸市2014	13.468	5.23441	8.43592			0	0	0	32.943	0.80487	41.4229	5.9468	1.67148	1.98455	5.20625	142	36.8	223.71	21	5081	0	0	0	1	0	1
130000	河北省	地级市	2015	邯郸市	63	邯郸	邯郸2015	邯郸市2015	10.8747	5.76834	7.93586			0	0	0	33.45	0.77169	46.65	6.06027	0.80104	2.20742	5.66795	263	40.03	227.22	34	5152	0	0	0	1	0	1
130000	河北省	地级市	2016	邯郸市	63	邯郸	邯郸2016	邯郸市2016	10.0926	6.83716	8.31338			0	0	0	35.265	0.76098	50.847	6.12815	0.832179	2.32248	6.2707	221	40.26	227.76	39	7139	0	0	0	1	0	1
130000	河北省	地级市	2017	邯郸市	63	邯郸	邯郸2017	邯郸市2017	11.4635	8.86668	10.086			0	0	0	35.567	0.60129	58.917	6.51319	0.923626	2.63478	7.04245	285			34	7067	0	0	0	1	0	1
130000	河北省	地级市	2018	邯郸市	63	邯郸	邯郸2018	邯郸市2018	11.5129	9.41238	10.4125			0	0	0	36.289	0.62506	62.696	7.04565	0.848067	2.69645	7.87117	416	45.83	236.76	41	7617	0	0	0	1	0	1
130000	河北省	地级市	2019	邯郸市	63	邯郸	邯郸2019	邯郸市2019	12.497	11.3542	11.9127			0	0	0	36.546	0.62134	66.54	7.51774	0.954235	3.04048	8.85744	260	45.59	235.77	35	8013	0	0	0	1	0	1
130000	河北省	地级市	2020	邯郸市	63	邯郸	邯郸2020	邯郸市2020	13.747	13.9807	13.8634			0	0	0	38.623	0.56287	71.148	7.9136	0.885832	3.36738	9.75724	455	46.44	236.07	38	7941	0	0	0	1	0	1
610000	陕西省	地级市	2006	汉中市	64	汉中	汉中2006	汉中市2006	8.69716	6.54188	7.54578	2018	-12	1	0	0	7.069	0.2349	13.9561	3.11783	0.186412	2.16946	1.20124	5	37.2	214.65	15	6590	0	0	0	1	0	1
610000	陕西省	地级市	2007	汉中市	64	汉中	汉中2007	汉中市2007	7.65852	7.62636	7.64242	2018	-11	1	0	0	8.319	0.2349	17.9647	3.51637	0.674212	2.0057	1.4841	7	36.98	213.88	2	1911	0	0	0	1	0	1
610000	陕西省	地级市	2008	汉中市	64	汉中	汉中2008	汉中市2008	9.98022	7.36416	8.57717	2018	-10	1	0	0	10.049	0.2339	22.3374	3.49753	0.63959	2.02022	1.84641	6	36.57	211.73	17	3935	0	0	0	1	0	1
610000	陕西省	地级市	2009	汉中市	64	汉中	汉中2009	汉中市2009	7.84204	7.94565	7.89368	2018	-9	1	0	0	11.834	0.2398	26.6307	3.46162	0.488458	2.20895	2.32084	12	41.25	219.2	7	3579	0	0	0	1	0	1
610000	陕西省	地级市	2010	汉中市	64	汉中	汉中2010	汉中市2010	6.51611	7.66209	7.06672	2018	-8	1	0	0	14.697	0.2501	30.1478	3.65401	0.550925	2.15457	2.8252	8	39.2	217.54	10	3995	0	0	0	1	0	1
610000	陕西省	地级市	2011	汉中市	64	汉中	汉中2011	汉中市2011	6.64934	8.00642	7.29753	2018	-7	1	0	0	18.952	0.2566	35.1256	3.63785	0.51308	1.97808	3.4748	22	36.7	214.74	16	5356	0	0	0	1	0	1
610000	陕西省	地级市	2012	汉中市	64	汉中	汉中2012	汉中市2012	13.0451	6.11335	8.95888	2018	-6	1	0	0	22.084	0.264	40.7363	3.98727	0.543361	1.95516	4.11936	24	36.4	215.25	11	4459	0	0	1	1	0	1
610000	陕西省	地级市	2013	汉中市	64	汉中	汉中2013	汉中市2013	27.6421	6.34996	13.4949	2018	5	1	0	0	22.843	0.3	43.7126	4.06365	0.61587	1.97189	4.73864	55	34.74	214.57	16	4127	0	0	1	1	0	1
610000	陕西省	地级市	2014	汉中市	64	汉中	汉中2014	汉中市2014	33.5721	6.47249	15.1285	2018	4	1	0	0	28.908	0.3087	46.3517	4.12603	0.626452	1.96308	5.20625	75	35.23	216.67	28	5517	0	0	1	1	0	1
610000	陕西省	地级市	2015	汉中市	64	汉中	汉中2015	汉中市2015	44.3488	7.26885	18.6592	2018	3	1	0	0	31.001	0.30325	51.411	4.19497	0.593317	2.08665	5.66795	66	37.98	219.99	22	5729	0	0	1	1	0	1
610000	陕西省	地级市	2016	汉中市	64	汉中	汉中2016	汉中市2016	29.5505	7.93562	15.5727	2018	6	1	0	0	33.597	0.2997	55.739	3.90755	0.617761	2.1036	6.2707	76	39.41	221.62	31	6147	0	0	1	1	0	1
610000	陕西省	地级市	2017	汉中市	64	汉中	汉中2017	汉中市2017	9.26962	12.338	10.7001	2018	-1	1	0	0	38.671	0.30217	60.395	3.42375	0.583967	2.01813	7.04245	101			50	7389	0	0	1	1	0	1
610000	陕西省	地级市	2018	汉中市	64	汉中	汉中2018	汉中市2018	12.0636	14.1087	13.0487	2018	0	1	1	1	42.754	0.2976	65.916	3.39454	0.56047	2.00851	7.87117	69	38.34	224.38	37	7191	0	0	1	1	0	1
610000	陕西省	地级市	2019	汉中市	64	汉中	汉中2019	汉中市2019	15.2721	14.2741	14.7653	2018	1	1	1	1	45.033	0.28916	69.926	3.17092	0.717668	2.10457	8.85744	62	42.45	227.69	30	7985	0	0	1	1	0	1
610000	陕西省	地级市	2020	汉中市	64	汉中	汉中2020	汉中市2020	20.0602	12.8366	16.0784	2018	2	1	1	1	49.179	0.27711	73.316	3.08717	0.739052	2.24283	9.75724	58	43.38	227	20	6946	0	0	1	1	0	1
330000	浙江省	副省级市	2006	杭州市	65	杭州	杭州2006	杭州市2006	9.9152	19.7445	14.0492	2010	4	1	0	0	51.878	1.2932	32.7919	8.75747	0.436618	4.12001	12.0124	323	45.1	240.6	9	7549	0	0	0	1	1	1
330000	浙江省	副省级市	2007	杭州市	65	杭州	杭州2007	杭州市2007	10.7437	16.9972	13.5371	2010	3	1	0	0	52.59	1.5282	36.4969	9.55129	3.62089	4.21855	14.841	451	45.85	241.88	12	3509	0	0	0	1	1	1
330000	浙江省	副省级市	2008	杭州市	65	杭州	杭州2008	杭州市2008	14.7871	18.8193	16.6917	2010	6	1	0	0	70.832	1.8241	40.1931	9.52389	4.41981	4.37771	18.4641	642	46.29	242.55	43	8123	0	0	0	1	1	1
330000	浙江省	副省级市	2009	杭州市	65	杭州	杭州2009	杭州市2009	17.1108	17.0394	17.075	2010	-1	1	0	0	63.333	2.0436	43.9466	10.2365	4.50085	5.3852	23.2084	866	49.33	245.57	25	5515	0	0	0	1	1	1
330000	浙江省	副省级市	2010	杭州市	65	杭州	杭州2010	杭州市2010	17.8825	17.2332	17.5551	2010	0	1	1	1	69.828	2.3271	48.7719	11.2846	4.67997	5.40632	28.252	1396	48.69	245.19	49	7722	0	0	1	1	1	1
330000	浙江省	副省级市	2011	杭州市	65	杭州	杭州2011	杭州市2011	17.0751	14.58	15.7821	2010	1	1	1	1	80.478	2.643	54.4085	11.186	4.67188	4.93884	34.748	1927	49.27	245.88	62	8726	0	0	1	1	1	1
330000	浙江省	副省级市	2012	杭州市	65	杭州	杭州2012	杭州市2012	19.2058	18.294	18.7449	2010	2	1	1	1	88.962	2.819	56.4178	11.0226	5.11113	4.71875	41.1936	2406	50.94	247.67	35	6400	0	0	1	1	1	1
330000	浙江省	副省级市	2013	杭州市	65	杭州	杭州2013	杭州市2013	18.1323	16.8018	17.4555	2010	-3	1	1	1	118.013	2.826	65.0533	11.3286	5.40587	4.81195	47.3864	3186	52.93	249.75	31	6777	0	0	1	1	1	1
330000	浙江省	副省级市	2014	杭州市	65	杭州	杭州2014	杭州市2014	26.0642	16.3712	20.7128	2010	-4	1	1	1	103.813	2.93442	70.8234	11.159	5.4525	4.81267	52.0625	2674	55.25	252.27	46	6434	0	0	1	1	1	1
330000	浙江省	副省级市	2015	杭州市	65	杭州	杭州2015	杭州市2015	21.6479	23.7192	22.6625	2010	-5	1	1	1	112.23	2.8856	77.816	12.2772	5.81919	5.11416	56.6795	3522	58.24	255.37	22	6046	0	1	1	1	1	1
330000	浙江省	副省级市	2016	杭州市	65	杭州	杭州2016	杭州市2016	23.8161	24.1794	23.9971	2010	-2	1	1	1	124.286	2.90135	87.153	12.3954	5.33495	5.1247	62.707	3649	60.89	258.2	35	7284	0	1	1	1	1	1
330000	浙江省	副省级市	2018	杭州市	65	杭州	杭州2018	杭州市2018	24.109	24.0441	24.0766	2010	8	1	1	1	140.18	2.79188	106.709	13.5098	6.88429	5.52867	67.8847	3649	63.9	261.64	21	7713	0	1	1	1	1	1
330000	浙江省	副省级市	2019	杭州市	65	杭州	杭州2019	杭州市2019	24.7066	28.0573	26.3354	2010	9	1	1	1	152.465	2.86544	108.091	12.7885	7.58828	5.52147	67.8847	3649	66.17	264.05	11	8104	0	1	1	1	1	1
330000	浙江省	副省级市	2020	杭州市	65	杭州	杭州2020	杭州市2020	2.74886	36.0113	10.4284	2010	10	1	1	1	136.617	2.92354	108.091	12.9976	6.9734	6.27578	67.8847	3649	68.04	264.94	18	6646	0	1	1	1	1	1
330000	浙江省	副省级市	2017	杭州市	65	杭州	杭州2017	杭州市2017	22.8524	21.5996	22.2181	2010	7	1	1	1	135.113	2.87022	96.67	12.4365	5.99148	5.06973	67.8847	3649			23	7003	0	1	1	1	1	1
340000	安徽省	地级市	2017	合肥市	66	合肥	合肥2017	合肥市2017	30.3815	4.34891	11.8333	2010	7	1	1	1	88.456	1.5139	77.484	9.36598	7.20904	3.81936	15.8455	2332			17	6131	0	1	1	1	1	0
340000	安徽省	地级市	2006	合肥市	66	合肥	合肥2006	合肥市2006	22.1396	1.44983	5.84189	2010	4	1	0	0	23.203	0.4552	21.9068	7.395	0.228503	3.3578	2.70279	53	46.71	240.96	9	6984	0	0	0	1	1	0
340000	安徽省	地级市	2007	合肥市	66	合肥	合肥2007	合肥市2007	25.2134	1.50989	6.39612	2010	3	1	0	0	28.134	0.4807	25.8737	12.6867	1.35864	3.25669	3.33922	105	45.24	239.45	6	6047	0	0	0	1	1	0
340000	安徽省	地级市	2008	合肥市	66	合肥	合肥2008	合肥市2008	25.2962	1.67534	6.74101	2010	6	1	0	0	34.482	0.4975	30.4012	13.3393	2.16367	3.2233	4.15442	111	43.53	237.21	18	7150	0	0	0	1	1	0
340000	安徽省	地级市	2009	合肥市	66	合肥	合肥2009	合肥市2009	26.359	0.96838	5.2757	2010	-1	1	0	0	41.543	0.6273	34.1436	8.60549	3.58313	3.43836	5.2219	155	42.26	237.07	17	6474	0	0	0	1	1	0
340000	安徽省	地级市	2010	合肥市	66	合肥	合肥2010	合肥市2010	27.1314	1.00133	5.44941	2010	0	1	1	1	54.796	0.711	39.2908	9.60273	5.65402	3.24098	6.3567	290	41.17	236.26	20	6483	0	0	0	1	1	0
340000	安徽省	地级市	2011	合肥市	66	合肥	合肥2011	合肥市2011	23.7487	0.95989	4.9597	2010	1	1	1	1	48.563	0.9774	45.4422	9.30846	4.00826	3.02844	7.8183	649	39.22	233.51	24	7555	0	0	0	1	1	0
340000	安徽省	地级市	2012	合肥市	66	合肥	合肥2012	合肥市2012	25.6065	0.91704	5.05518	2010	2	1	1	1	55.186	1.156	50.7237	9.3532	3.96295	3.13372	9.26857	724	39.17	233.65	16	6917	0	0	0	1	1	0
340000	安徽省	地级市	2013	合肥市	66	合肥	合肥2013	合肥市2013	28.1429	1.29475	6.30511	2010	-3	1	1	1	65.631	1.445	54.2108	9.3865	4.12403	3.27153	10.6619	964	39.42	234.13	21	7641	0	0	0	1	1	0
340000	安徽省	地级市	2014	合肥市	66	合肥	合肥2014	合肥市2014	28.5964	1.63502	7.12711	2010	-4	1	1	1	67.689	1.45012	59.6484	9.65807	4.1576	3.34179	11.7141	1154	39.88	235.01	12	6066	0	0	0	1	1	0
340000	安徽省	地级市	2015	合肥市	66	合肥	合肥2015	合肥市2015	30.5543	2.15788	8.46082	2010	-5	1	1	1	73.102	1.43866	65.806	10.0975	4.82313	3.64019	12.7529	1386	42.75	238.1	16	6717	0	0	0	1	1	0
340000	安徽省	地级市	2016	合肥市	66	合肥	合肥2016	合肥市2016	43.4084	2.82702	11.7642	2010	-2	1	1	1	80.138	1.48018	71.054	9.79937	7.58828	3.93689	14.1091	2096	44.99	240.68	20	7912	0	1	0	1	1	0
340000	安徽省	地级市	2018	合肥市	66	合肥	合肥2018	合肥市2018	29.7716	5.29667	12.8694	2010	8	1	1	1	97.47	1.83289	89.022	9.10769	7.58828	3.70516	17.7101	3281	50.28	246.75	16	7247	0	1	1	1	1	0
340000	安徽省	地级市	2019	合肥市	66	合肥	合肥2019	合肥市2019	29.5679	5.44336	12.9915	2010	9	1	1	1	115.623	1.70907	95.156	7.92851	7.58828	3.34374	19.9292	2249	60.6	257.5	15	6034	0	1	1	1	1	0
340000	安徽省	地级市	2020	合肥市	66	合肥	合肥2020	合肥市2020	28.4001	6.36775	13.7106	2010	10	1	1	1	108.427	1.72991	104.818	7.59408	7.58828	3.58107	21.9538	3523	61.06	257.76	14	5729	0	1	1	1	1	0
450000	广西壮族自治区	地级市	2006	河池市	67	河池	河池2006	河池市2006	14.9257	55.9287	29.8122			0	0	0	6.449	0.1709	16.0678	5.29571	0.248617	1.3735	0	2	33.44	207.42	0	0	0	0	0	1	0	1
450000	广西壮族自治区	地级市	2007	河池市	67	河池	河池2007	河池市2007	14.492	58.5079	30.1685			0	0	0	8.486	0.1744	19.6427	4.5269	0.674753	1.26791	0		31.64	208.51	21	6450	0	0	0	1	0	1
450000	广西壮族自治区	地级市	2008	河池市	67	河池	河池2008	河池市2008	18.3963	94.3082	44.6436			0	0	0	9.667	0.1742	23.4093	4.87588	0.653459	1.31161	0	4	32.83	210.96	27	6891	0	0	0	1	0	1
450000	广西壮族自治区	地级市	2009	河池市	67	河池	河池2009	河池市2009	16.0658	74.739	36.4732			0	0	0	9.949	0.1775	22.7616	5.49743	0.623551	1.64114	0	2	35.2	213.73	31	8573	0	0	0	1	0	1
450000	广西壮族自治区	地级市	2010	河池市	67	河池	河池2010	河池市2010	11.7062	58.7119	27.3809			0	0	0	13.912	0.1824	27.523	4.89669	0.535511	1.58095	0	1	32.98	212.1	41	9568	0	0	0	1	0	1
450000	广西壮族自治区	地级市	2011	河池市	67	河池	河池2011	河池市2011	8.72459	47.7413	21.2031			0	0	0	15.141	0.1908	29.9038	4.56318	0.639252	1.66417	0	4	35.26	211.86	45	7026	0	0	0	1	0	1
450000	广西壮族自治区	地级市	2012	河池市	67	河池	河池2012	河池市2012	4.76355	59.5484	18.1714			0	0	0	14.472	0.193	31.6643	4.4998	0.778107	2.00134	0	6	38.97	213.31	0	0	0	0	0	1	0	1
450000	广西壮族自治区	地级市	2013	河池市	67	河池	河池2013	河池市2013	9.44764	45.6127	21.4548			0	0	0	12.769	0.197	37.4699	5.10271	0.889741	2.15366	0	14	38.79	213.48	22	6531	0	0	0	1	0	1
450000	广西壮族自治区	地级市	2014	河池市	67	河池	河池2014	河池市2014	55.3454	44.2696	49.5689			0	0	0	17.474	0.19378	40.3805	4.97728	0.868481	2.13822	0	17	43.04	220.21	17	5933	0	0	0	1	0	1
450000	广西壮族自治区	地级市	2015	河池市	67	河池	河池2015	河池市2015	55.6128	58.5596	57.0721			0	0	0	17.841	0.18799	53.638	5.08831	0.582775	2.24642	0	28	44.85	222.05	28	8257	0	0	0	1	0	1
450000	广西壮族自治区	地级市	2016	河池市	67	河池	河池2016	河池市2016	53.2949	58.1746	55.6948			0	0	0	18.842	0.18908	61.259	5.07599	0.435396	2.39875	0	43	46.64	223.69	16	7302	0	0	0	1	0	1
450000	广西壮族自治区	地级市	2017	河池市	67	河池	河池2017	河池市2017	5.31372	82.0879	23.3906			0	0	0	20.921	0.18616	66.085	4.93093	0.370492	2.43242	0	32			33	7706	0	0	0	1	0	1
450000	广西壮族自治区	地级市	2018	河池市	67	河池	河池2018	河池市2018	4.10649	72.5586	19.1765			0	0	0	22.302	0.18844	71.345	5.06505	0.32063	2.40022	0	60	47.9	227.49	27	8593	0	0	0	1	0	1
450000	广西壮族自治区	地级市	2019	河池市	67	河池	河池2019	河池市2019	4.25462	58.7408	17.0916			0	0	0	24.703	0.19772	79.601	4.85089	0.21005	2.28956	0	38	50.32	228.83	20	7554	0	0	0	1	0	1
450000	广西壮族自治区	地级市	2020	河池市	67	河池	河池2020	河池市2020	4.74789	59.4122	18.1183			0	0	0	27.119	0.21963	85.292	5.4722	0.144698	2.37899	0	52	50.11	228.67	24	6408	0	0	0	1	0	1
440000	广东省	地级市	2006	河源市	68	河源	河源2006	河源市2006	20.3327	22.4675	21.3762			0	0	0	9.495	0.2125	17.3578	4.7432	0.286995	1.38407	0		35.73	218.94	12	6920	0	0	0	1	0	1
440000	广东省	地级市	2007	河源市	68	河源	河源2007	河源市2007	27.7992	17.2789	21.9826			0	0	0	11.71	0.2229	20.1064	4.61947	0.681504	1.3932	0	2	33.19	219.79	21	7457	0	0	0	1	0	1
440000	广东省	地级市	2008	河源市	68	河源	河源2008	河源市2008	31.322	24.4981	27.7284			0	0	0	13.86	0.2333	22.0546	4.46829	0.668324	1.36017	0	3	31.66	218.27	33	8436	0	0	0	1	0	1
440000	广东省	地级市	2009	河源市	68	河源	河源2009	河源市2009	27.5787	19.1605	23.0298			0	0	0	13.928	0.248	23.8059	4.97759	0.794338	1.73577	0	16	34.86	221.72	30	7253	0	0	0	1	0	1
440000	广东省	地级市	2010	河源市	68	河源	河源2010	河源市2010	20.8216	21.8748	21.3424			0	0	0	16.301	0.2468	26.3793	5.28068	0.841999	1.76518	0	16	35.83	223.11	26	7072	0	0	0	1	0	1
440000	广东省	地级市	2011	河源市	68	河源	河源2011	河源市2011	18.4113	19.565	18.9802			0	0	0	19.505	0.2459	31.2371	5.41471	1.05398	1.64102	0	28	34.59	222.11	8	3554	0	0	0	1	0	1
440000	广东省	地级市	2012	河源市	68	河源	河源2012	河源市2012	28.063	20.8231	24.2049			0	0	0	20.536	0.238	35.9837	6.11779	0.890141	1.79246	0	17	35.38	222.62	24	6009	0	0	1	1	0	1
440000	广东省	地级市	2013	河源市	68	河源	河源2013	河源市2013	14.4998	23.2928	18.424			0	0	0	18.846	0.254	41.0947	7.17111	0.79666	1.95115	0	35	38.24	226.03	16	5712	0	0	1	1	0	1
440000	广东省	地级市	2014	河源市	68	河源	河源2014	河源市2014	24.3683	22.9492	23.6493			0	0	0	25.208	0.26199	46.0773	7.86359	2.02117	2.04815	0	37	41.53	230.14	30	6038	0	0	1	1	0	1
440000	广东省	地级市	2015	河源市	68	河源	河源2015	河源市2015	30.4286	24.4246	27.2833			0	0	0	26.401	0.27073	51.456	8.33006	1.69123	2.20963	0	55	42.68	231.07	15	6013	0	0	1	1	0	1
440000	广东省	地级市	2016	河源市	68	河源	河源2016	河源市2016	30.6306	25.9936	28.2298			0	0	0	29.205	0.27898	56.513	7.66576	1.84155	2.25581	0	84	45.23	234.01	22	7743	0	0	1	1	0	1
440000	广东省	地级市	2017	河源市	68	河源	河源2017	河源市2017	9.6788	28.1008	16.686			0	0	0	30.659	0.28103	61.561	7.52373	1.52149	2.3954	0	125			31	6511	0	0	1	1	0	1
440000	广东省	地级市	2018	河源市	68	河源	河源2018	河源市2018	10.4706	28.0852	17.3272			0	0	0	32.53	0.28901	68.94	7.64926	2.24985	2.51526	0	180	50.96	240.25	22	7306	0	0	1	1	0	1
440000	广东省	地级市	2019	河源市	68	河源	河源2019	河源市2019	6.79163	36.4646	16.1987			0	0	0	34.842	0.2723	71.939	7.17344	1.04168	2.58724	0	193	54.36	243.16	36	7999	0	0	1	1	0	1
440000	广东省	地级市	2020	河源市	68	河源	河源2020	河源市2020	6.62202	35.1748	15.6903			0	0	0	38.802	0.26902	86.494	7.23529	0.942583	2.80832	0	195	53.58	241.16	24	7959	0	0	1	1	0	1
370000	山东省	地级市	2006	菏泽市	69	菏泽	菏泽2006	菏泽市2006	8.58591	0.15689	1.17948			0	0	0	6.652	0.3444	13.1222	5.56625	0.166344	1.65679	0	12	23.25	195.88	11	6489	0	0	0	1	0	0
370000	山东省	地级市	2007	菏泽市	69	菏泽	菏泽2007	菏泽市2007	31.1641	0.14192	1.5946			0	0	0	8.424	0.349	14.3584	6.13863	1.23963	1.47909	0	12	25.08	198.55	15	4402	0	0	0	1	0	0
370000	山东省	地级市	2008	菏泽市	69	菏泽	菏泽2008	菏泽市2008	31.7807	0.58971	4.59662			0	0	0	10.05	0.3432	16.8053	6.14326	1.21611	1.44573	0	25	25.69	201.9	20	5322	0	0	0	1	0	0
370000	山东省	地级市	2009	菏泽市	69	菏泽	菏泽2009	菏泽市2009	28.3313	0.31103	3.14422			0	0	0	11.649	0.35	19.2524	6.32742	1.06934	1.62519	0	22	27.57	206.15	18	4962	0	0	0	1	0	0
370000	山东省	地级市	2010	菏泽市	69	菏泽	菏泽2010	菏泽市2010	25.0506	0.28758	2.82306			0	0	0	14.841	0.3721	21.9594	6.90147	0.988306	1.53814	0	38	29.2	211.24	8	5736	0	0	0	1	0	0
370000	山东省	地级市	2011	菏泽市	69	菏泽	菏泽2011	菏泽市2011	25.8346	0.71938	4.51009			0	0	0	18.746	0.399	26.9213	7.16949	1.04192	1.41567	0	63	30.8	216.15	27	6102	0	0	0	1	0	0
370000	山东省	地级市	2012	菏泽市	69	菏泽	菏泽2012	菏泽市2012	9.58023	0.68838	2.6012			0	0	0	21.461	0.419	32.2137	7.84961	1.46955	1.49389	0	90	32.01	218.53	14	5623	0	0	0	1	0	0
370000	山东省	地级市	2013	菏泽市	69	菏泽	菏泽2013	菏泽市2013	9.34406	0.80718	2.77847			0	0	0	21.421	0.501	35.6934	7.7707	1.11317	1.52645	0	111	33.24	220.8	12	4771	0	0	0	1	0	0
370000	山东省	地级市	2014	菏泽市	69	菏泽	菏泽2014	菏泽市2014	19.2438	1.90407	6.19117			0	0	0	26.446	0.50296	39.4169	7.28857	1.17365	1.65392	0	96	34.69	222.97	14	4640	0	0	0	1	0	0
370000	山东省	地级市	2015	菏泽市	69	菏泽	菏泽2015	菏泽市2015	19.9142	2.178	6.73372			0	0	0	28.35	0.51997	45.06	7.39942	0.599216	1.74343	0	135	35.96	224.71	21	5313	0	0	0	1	0	0
370000	山东省	地级市	2016	菏泽市	69	菏泽	菏泽2016	菏泽市2016	18.4731	2.63644	7.10389			0	0	0	29.904	0.52214	50.979	7.22763	0.693622	1.88645	0	344	37.77	226.81	6	6037	0	0	0	1	0	0
370000	山东省	地级市	2017	菏泽市	69	菏泽	菏泽2017	菏泽市2017	3.25218	3.66558	3.4528			0	0	0	32.558	0.52509	55.298	6.60169	0.432427	1.9377	0	191			11	7070	0	0	0	1	0	0
370000	山东省	地级市	2018	菏泽市	69	菏泽	菏泽2018	菏泽市2018	3.12151	6.32338	4.44897			0	0	0	35.184	0.48853	60.527	6.692	0.361625	2.00492	0	250	39.22	229.44	25	6704	0	0	0	1	0	0
370000	山东省	地级市	2019	菏泽市	69	菏泽	菏泽2019	菏泽市2019	3.17555	9.88667	5.62903			0	0	0	38.867	0.45634	66.362	6.50798	0.288271	2.04285	0	222	47.88	238.39	10	7171	0	0	0	1	0	0
370000	山东省	地级市	2020	菏泽市	69	菏泽	菏泽2020	菏泽市2020	6.19901	10.5283	8.09006			0	0	0	39.599	0.48141	71.449	6.83083	0.379146	2.2979	0	388	49.87	239.94	10	6746	0	0	0	1	0	0
450000	广西壮族自治区	地级市	2006	贺州市	70	贺州	贺州2006	贺州市2006	3.38765	61.0352	15.7207			0	0	0	8.925	0.0795	14.773	4.4842	0.132797	0.904215	0	1	25.04	196.77	16	7572	0	0	0	1	0	1
450000	广西壮族自治区	地级市	2007	贺州市	70	贺州	贺州2007	贺州市2007	5.98835	62.364	20.794			0	0	0	11.552	0.0809	18.2351	4.06198	0.432994	0.866977	0		23.68	196.68	19	6365	0	0	0	1	0	1
450000	广西壮族自治区	地级市	2008	贺州市	70	贺州	贺州2008	贺州市2008	9.49822	99.8346	34.5879			0	0	0	12.103	0.0808	22.248	6.3322	0.461269	0.895133	0	2	25.77	204.07	13	4600	0	0	0	1	0	1
450000	广西壮族自治区	地级市	2009	贺州市	70	贺州	贺州2009	贺州市2009	7.85841	79.1432	27.313			0	0	0	11.573	0.0797	22.9648	4.1691	0.460108	1.23005	0		32.44	209.85	15	5348	0	0	0	1	0	1
450000	广西壮族自治区	地级市	2010	贺州市	70	贺州	贺州2010	贺州市2010	5.07493	61.7111	19.128			0	0	0	14.58	0.0884	28.2791	4.08582	0.47773	1.33465	0	2	31.54	210.09	15	5632	0	0	0	1	0	1
450000	广西壮族自治区	地级市	2011	贺州市	70	贺州	贺州2011	贺州市2011	3.63905	49.7024	14.364			0	0	0	18.163	0.0905	29.2669	3.93479	0.532738	1.32205	0	4	31.54	209.4	36	8537	0	0	0	1	0	1
450000	广西壮族自治区	地级市	2012	贺州市	70	贺州	贺州2012	贺州市2012	4.40675	59.7086	17.5493			0	0	0	19.904	0.095	35.4183	4.87286	1.09923	1.40391	0	5	31.77	210.1	9	5429	0	0	0	1	0	1
450000	广西壮族自治区	地级市	2013	贺州市	70	贺州	贺州2013	贺州市2013	3.40036	47.8702	13.604			0	0	0	18.113	0.1	39.2435	5.17983	1.10349	1.52608	0	3	31.84	209.98	19	5885	0	0	0	1	0	1
450000	广西壮族自治区	地级市	2014	贺州市	70	贺州	贺州2014	贺州市2014	4.07729	65.7462	17.9582			0	0	0	22.345	0.1017	43.1345	9.0559	1.28321	1.64781	0	8	35.32	213.47	34	6351	0	0	0	1	0	1
450000	广西壮族自治区	地级市	2015	贺州市	70	贺州	贺州2015	贺州市2015	4.70383	84.3491	22.5194			0	0	0	23.178	0.09921	55.799	10.0699	0.748379	1.80611	0	8	37.66	215.63	41	6079	0	0	0	1	0	1
450000	广西壮族自治区	地级市	2016	贺州市	70	贺州	贺州2016	贺州市2016	2.16649	83.9785	15.68			0	0	0	25.499	0.10191	62.11	6.25618	0.375425	1.90168	0	20	37.67	216.16	47	4647	0	0	0	1	0	1
450000	广西壮族自治区	地级市	2017	贺州市	70	贺州	贺州2017	贺州市2017	10.3317	79.3092	30.9642			0	0	0	26.802	0.10672	65.799	5.62858	0.616658	2.1491	0	26			23	3186	0	0	0	1	0	1
450000	广西壮族自治区	地级市	2018	贺州市	70	贺州	贺州2018	贺州市2018	9.31947	69.9029	27.3357			0	0	0	29.188	0.10565	71.144	5.39267	0.623099	2.14476	0	52	44.74	224.89	16	3224	0	0	0	1	0	1
450000	广西壮族自治区	地级市	2019	贺州市	70	贺州	贺州2019	贺州市2019	7.42668	57.3441	21.86			0	0	0	33.676	0.11312	76.481	5.15817	0.207702	1.97459	0	22	45.78	226.35	7	3335	0	0	0	1	0	1
450000	广西壮族自治区	地级市	2020	贺州市	70	贺州	贺州2020	贺州市2020	9.69032	57.2284	24.7119			0	0	0	37.539	0.11255	86.858	5.42041	0.118459	2.0689	0	43	46.68	227.58	13	5377	0	0	0	1	0	1
410000	河南省	地级市	2006	鹤壁市	71	鹤壁	鹤壁2006	鹤壁市2006	6.11265	4.41108	5.19441			0	0	0	14.703	0.1572	13.7117	4.79288	0.370675	1.24333	0	4	23.37	207.27	11	6815	0	0	0	1	0	1
410000	河南省	地级市	2007	鹤壁市	71	鹤壁	鹤壁2007	鹤壁市2007	5.77883	3.80409	4.69102			0	0	0	19.195	0.1606	16.7385	5.10221	1.05694	1.1492	0	6	23.77	210.51	28	5811	0	0	0	1	0	1
410000	河南省	地级市	2008	鹤壁市	71	鹤壁	鹤壁2008	鹤壁市2008	6.59164	9.16837	7.77804			0	0	0	24.07	0.1614	18.4311	4.63671	1.45266	1.07657	0	13	21.76	209.33	32	5544	0	0	0	1	0	1
410000	河南省	地级市	2009	鹤壁市	71	鹤壁	鹤壁2009	鹤壁市2009	7.76423	3.94454	5.54289			0	0	0	25.37	0.1711	21.13	4.9518	0.820744	1.34295	0	9	19.14	206.95	34	6474	0	0	0	1	0	1
410000	河南省	地级市	2010	鹤壁市	71	鹤壁	鹤壁2010	鹤壁市2010	8.03108	3.50907	5.3208			0	0	0	28.531	0.1781	25.8578	5.16269	0.862692	1.29063	0	17	18.26	206.9	21	6042	0	0	0	1	0	1
410000	河南省	地级市	2011	鹤壁市	71	鹤壁	鹤壁2011	鹤壁市2011	8.13842	3.47145	5.3282			0	0	0	31.763	0.1858	30.2655	5.59735	0.870207	1.17617	0	29	18.23	206.9	29	7133	0	0	0	1	0	1
410000	河南省	地级市	2012	鹤壁市	71	鹤壁	鹤壁2012	鹤壁市2012	9.61167	4.31613	6.4576			0	0	0	34.456	0.192	34.0418	5.98389	0.841721	1.28845	0	22	18.88	208.23	18	5592	0	0	0	1	0	1
410000	河南省	地级市	2013	鹤壁市	71	鹤壁	鹤壁2013	鹤壁市2013	8.75268	3.28139	5.37671			0	0	0	37.477	0.224	37.5806	6.37178	1.00345	1.31096	0	35	18.46	208.65	17	4894	0	0	0	1	0	1
410000	河南省	地级市	2014	鹤壁市	71	鹤壁	鹤壁2014	鹤壁市2014	8.78542	3.01918	5.16948			0	0	0	42.55	0.23542	37.7251	6.90517	1.07816	1.34278	0	37	23.33	214.03	39	6209	0	0	0	1	0	1
410000	河南省	地级市	2015	鹤壁市	71	鹤壁	鹤壁2015	鹤壁市2015	9.77096	3.67292	6.01241			0	0	0	44.778	0.23472	39.646	7.3699	0.883094	1.42401	0	39	26.09	217.45	23	6100	0	0	0	1	0	1
410000	河南省	地级市	2016	鹤壁市	71	鹤壁	鹤壁2016	鹤壁市2016	10.0686	3.33585	5.82156			0	0	0	47.94	0.23288	42.424	7.20519	1.0975	1.46574	0	41	26.76	218.73	28	7523	0	0	0	1	0	1
410000	河南省	地级市	2017	鹤壁市	71	鹤壁	鹤壁2017	鹤壁市2017	10.7748	4.29304	6.82592			0	0	0	51.168	0.2251	46.871	7.21641	1.38393	1.49306	0	47			23	6899	0	0	0	1	0	1
410000	河南省	地级市	2018	鹤壁市	71	鹤壁	鹤壁2018	鹤壁市2018	10.8723	6.65665	8.51803			0	0	0	53.063	0.16082	54.967	7.48821	2.02423	1.48477	0	111	29.72	222.75	29	5814	0	0	0	1	0	1
410000	河南省	地级市	2019	鹤壁市	71	鹤壁	鹤壁2019	鹤壁市2019	11.0648	8.11841	9.4831			0	0	0	60.672	0.17689	58.801	7.02235	2.47837	1.42041	0	81	33.54	227.03	41	6986	0	0	0	1	0	1
410000	河南省	地级市	2020	鹤壁市	71	鹤壁	鹤壁2020	鹤壁市2020	11.6664	9.70241	10.6415			0	0	0	62.736	0.15462	58.297	7.24124	3.32847	1.59242	0	81	35.58	227.63	27	5764	0	0	0	1	0	1
230000	黑龙江省	地级市	2006	鹤岗市	72	鹤岗	鹤岗2006	鹤岗市2006	4.88932	0.7827	1.96484			0	0	0	11.863	0.2713	18.4796	5.4117	0.145966	2.18232	0	1	34.69	211.21	15	8297	0	0	0	1	0	0
230000	黑龙江省	地级市	2007	鹤岗市	72	鹤岗	鹤岗2007	鹤岗市2007	4.19137	0.55264	1.52842			0	0	0	14.048	0.2894	18.5584	5.0631	0.596508	1.98758	0	5	34.41	211.32	15	8193	0	0	0	1	0	0
230000	黑龙江省	地级市	2008	鹤岗市	72	鹤岗	鹤岗2008	鹤岗市2008	3.49808	1.18616	2.04008			0	0	0	16.887	0.2681	22.794	5.05241	0.531289	1.96063	0	5	32.34	208.25	14	6024	0	0	0	1	0	0
230000	黑龙江省	地级市	2009	鹤岗市	72	鹤岗	鹤岗2009	鹤岗市2009	2.8741	1.16834	1.83419			0	0	0	18.509	0.265	25.2475	5.80557	0.478527	2.46199	0	6	29.13	204.66	21	6943	0	0	0	1	0	0
230000	黑龙江省	地级市	2010	鹤岗市	72	鹤岗	鹤岗2010	鹤岗市2010	2.13438	2.35898	2.2439			0	0	0	23.044	0.2589	29.3668	6.1702	0.89906	2.2016	0	5	26.95	200.5	23	8249	0	0	0	1	0	0
230000	黑龙江省	地级市	2011	鹤岗市	72	鹤岗	鹤岗2011	鹤岗市2011	3.84253	3.27518	3.54773			0	0	0	28.774	0.2618	37.5258	6.76683	0.776778	2.01916	0	5	24.12	195.96	2	2516	0	0	0	1	0	0
230000	黑龙江省	地级市	2012	鹤岗市	72	鹤岗	鹤岗2012	鹤岗市2012	3.73768	4.39086	4.05139			0	0	0	32.968	0.259	40.0114	7.57728	0.530043	1.96117	0	5	23.71	195.88	21	7935	0	0	0	1	0	0
230000	黑龙江省	地级市	2013	鹤岗市	72	鹤岗	鹤岗2013	鹤岗市2013	3.59981	5.71391	4.53804			0	0	0	29.631	0.225	39.9379	6.40281	1.21024	2.43909	0	9	25.94	196.72	16	7700	0	0	0	1	0	0
230000	黑龙江省	地级市	2014	鹤岗市	72	鹤岗	鹤岗2014	鹤岗市2014	2.91539	4.21521	3.50661			0	0	0	24.154	0.19959	39.6217	6.47734	0.677908	3.24013	0	5	32.82	197.02	9	6619	0	0	0	1	0	0
230000	黑龙江省	地级市	2015	鹤岗市	72	鹤岗	鹤岗2015	鹤岗市2015	2.98069	3.19398	3.08552			0	0	0	24.981	0.19877	41.066	5.86907	0.421547	3.83328	0	10	34.93	199.74	12	6782	0	0	0	1	0	0
230000	黑龙江省	地级市	2016	鹤岗市	72	鹤岗	鹤岗2016	鹤岗市2016	2.29663	4.43306	3.19355			0	0	0	25.244	0.18844	48.745	7.14497	0.325217	4.08806	0	11	35.81	201.53	16	7353	0	0	0	1	0	0
230000	黑龙江省	地级市	2017	鹤岗市	72	鹤岗	鹤岗2017	鹤岗市2017	1.83303	5.27699	3.11702			0	0	0	27.658	0.1853	54.001	8.17684	0.218258	4.14474	0	15			24	6436	0	0	0	1	0	0
230000	黑龙江省	地级市	2018	鹤岗市	72	鹤岗	鹤岗2018	鹤岗市2018	1.89293	6.58888	3.5441			0	0	0	28.891	0.16391	53.486	8.71616	0.309192	4.09247	0	8	37.44	207.41	20	7005	0	0	0	1	0	0
230000	黑龙江省	地级市	2019	鹤岗市	72	鹤岗	鹤岗2019	鹤岗市2019	1.95525	7.77388	3.91748			0	0	0	33.981	0.16908	48.238	7.42265	0.344656	3.64026	0	8	41.86	213.17	18	6363	0	0	0	1	0	0
230000	黑龙江省	地级市	2020	鹤岗市	72	鹤岗	鹤岗2020	鹤岗市2020	1.54657	8.91934	3.74228			0	0	0	34.809	0.14032	55.114	6.76009	0.200617	4.08275	0	16	40.29	209.7	26	7819	0	0	0	1	0	0
230000	黑龙江省	地级市	2006	黑河市	73	黑河	黑河2006	黑河市2006	4.25008	0.42724	1.35421			0	0	0	7.795	0.2681	13.4452	2.78661	0.180497	2.16087	0	2	45.93	208.06	8	5345	0	0	0	1	0	1
230000	黑龙江省	地级市	2007	黑河市	73	黑河	黑河2007	黑河市2007	4.78723	0.75784	1.91299			0	0	0	9.37	0.2684	16.6069	2.83702	0.662637	1.90898	0	1	42.69	201.3	9	5597	0	0	0	1	0	1
230000	黑龙江省	地级市	2008	黑河市	73	黑河	黑河2008	黑河市2008	4.2027	2.14548	3.00536			0	0	0	11.8	0.2854	19.5373	3.49277	0.621788	1.80916	0	1	39.53	195.88	16	5844	0	0	0	1	0	1
230000	黑龙江省	地级市	2009	黑河市	73	黑河	黑河2009	黑河市2009	0.71116	0.83117	0.769705			0	0	0	12.882	0.2928	18.3475	4.40262	0.530099	2.09887	0	5	39.42	195.88	18	5818	0	0	0	1	0	1
230000	黑龙江省	地级市	2010	黑河市	73	黑河	黑河2010	黑河市2010	0.71116	1.18386	0.769705			0	0	0	14.994	0.2946	20.2284	7.48474	0.328253	2.13622	0	3	38.09	195.88	19	6709	0	0	0	1	0	1
230000	黑龙江省	地级市	2011	黑河市	73	黑河	黑河2011	黑河市2011	0.71116	1.05191	0.769705			0	0	0	18.103	0.3018	19.1761	5.83451	0.523797	2.02901	0	11	34.34	195.88	15	6968	0	0	0	1	0	1
230000	黑龙江省	地级市	2012	黑河市	73	黑河	黑河2012	黑河市2012	0.71116	2.94144	1.27972			0	0	0	18.892	0.314	21.8188	5.78998	0.482706	2.00648	0	7	33.01	195.88	12	5179	0	0	0	1	0	1
230000	黑龙江省	地级市	2013	黑河市	73	黑河	黑河2013	黑河市2013	0.71116	3.47592	1.35687			0	0	0	22.654	0.316	33.2808	5.92196	0.865954	1.95785	0	12	34.59	195.88	34	5371	0	0	0	1	0	1
230000	黑龙江省	地级市	2014	黑河市	73	黑河	黑河2014	黑河市2014	0.71116	2.72608	1.28466			0	0	0	24.731	0.31343	33.9485	6.25604	0.578692	2.20174	0	16	35.84	195.88	22	5782	0	0	0	1	0	1
230000	黑龙江省	地级市	2015	黑河市	73	黑河	黑河2015	黑河市2015	0.80192	4.19071	1.83927			0	0	0	26.575	0.30654	42.6852	6.46324	0.697349	2.62422	0	7	36.51	195.88	27	6606	0	0	0	1	0	1
230000	黑龙江省	地级市	2016	黑河市	73	黑河	黑河2016	黑河市2016	0.85002	4.13431	1.88042			0	0	0	27.889	0.12042	51.422	6.43964	0.377168	2.7101	0	18	37.7	195.88	39	7710	0	0	0	1	0	1
230000	黑龙江省	地级市	2017	黑河市	73	黑河	黑河2017	黑河市2017	0.71116	7.42865	2.26774			0	0	0	30.236	0.11822	52.329	6.57486	0.253154	2.73394	0	7			23	7189	0	0	0	1	0	1
230000	黑龙江省	地级市	2018	黑河市	73	黑河	黑河2018	黑河市2018	0.71116	9.42715	2.60466			0	0	0	31.592	0.22068	46.663	6.80813	0.237566	2.70669	0	20	40.06	195.88	23	6832	0	0	0	1	0	1
230000	黑龙江省	地级市	2019	黑河市	73	黑河	黑河2019	黑河市2019	0.71116	10.7178	2.79714			0	0	0	36.478	0.17709	53.82	6.7029	0.172024	2.41249	0	13	45.4	202.86	38	6748	0	0	0	1	0	1
230000	黑龙江省	地级市	2020	黑河市	73	黑河	黑河2020	黑河市2020	0.71116	8.10831	1.69288			0	0	0	39.184	0.13185	62.944	6.91496	0.215614	2.41811	0	30	42.44	197.56	23	6507	0	0	0	1	0	1
130000	河北省	地级市	2006	衡水市	74	衡水	衡水2006	衡水市2006	2.35273	1.03035	1.55801			0	0	0	12.944	0.2144	13.3628	2.78661	0.244233	1.63071	0.30031	15	30.13	212.14	0	0	0	0	0	1	0	1
130000	河北省	地级市	2007	衡水市	74	衡水	衡水2007	衡水市2007	2.0182	0.57632	1.07967			0	0	0	13.132	0.2117	15.8781	2.78661	0.723991	1.74263	0.371024	23	32.93	215.38	6	3682	0	0	0	1	0	1
130000	河北省	地级市	2008	衡水市	74	衡水	衡水2008	衡水市2008	3.13333	5.67935	4.22239			0	0	0	14.843	0.21	19.3796	2.78661	0.73289	1.72614	0.461602	26	33.68	216.27	5	3109	0	0	0	1	0	1
130000	河北省	地级市	2009	衡水市	74	衡水	衡水2009	衡水市2009	4.20086	1.3463	2.38285			0	0	0	15.192	0.2132	22.7603	3.32578	0.609436	2.07573	0.580211	28	30.35	211.5	20	3482	0	0	0	1	0	1
130000	河北省	地级市	2010	衡水市	74	衡水	衡水2010	衡水市2010	4.17988	2.48702	3.22595			0	0	0	18.076	0.2179	25.697	3.57756	0.601343	2.06183	0.7063	42	29.63	209.91	17	6217	0	0	0	1	0	1
130000	河北省	地级市	2011	衡水市	74	衡水	衡水2011	衡水市2011	7.43523	3.26429	4.93689			0	0	0	21.334	0.2696	28.9996	4.00953	0.487998	2.04818	0.8687	30	28.65	209.86	35	6278	0	0	0	1	0	1
130000	河北省	地级市	2012	衡水市	74	衡水	衡水2012	衡水市2012	5.82641	4.21458	4.95699			0	0	0	23.101	0.291	32.9454	5.0181	0.456192	2.25233	1.02984	68	29.58	210.88	30	6534	0	0	0	1	0	1
130000	河北省	地级市	2013	衡水市	74	衡水	衡水2013	衡水市2013	8.91241	4.16467	6.10587			0	0	0	23.889	0.296	36.6859	6.4037	0.42605	2.56827	1.18466	95	32.1	216.38	19	6168	0	0	0	1	0	1
130000	河北省	地级市	2014	衡水市	74	衡水	衡水2014	衡水市2014	7.17728	4.86659	5.91334			0	0	0	26.022	0.29532	41.93	12.9323	0.339566	2.76752	1.30156	90	37.65	223.16	37	6713	0	0	0	1	0	1
130000	河北省	地级市	2015	衡水市	74	衡水	衡水2015	衡水市2015	6.14356	5.36845	5.74331			0	0	0	27.543	0.29519	47.174	7.25532	0.316254	3.04912	1.41699	115	40	226.14	30	7117	0	0	0	1	0	1
130000	河北省	地级市	2016	衡水市	74	衡水	衡水2016	衡水市2016	10.4443	6.06117	7.96805			0	0	0	31.955	0.2863	50.294	6.74031	0.562556	2.83439	1.56767	150	39.96	226.98	46	8002	0	0	0	1	0	1
130000	河北省	地级市	2017	衡水市	74	衡水	衡水2017	衡水市2017	5.75286	9.37501	7.35191			0	0	0	34.177	0.22792	58.014	6.79324	1.04533	2.96065	1.76061	194			50	8514	0	0	0	1	0	1
130000	河北省	地级市	2018	衡水市	74	衡水	衡水2018	衡水市2018	7.93773	10.4617	9.11664			0	0	0	34.898	0.23315	62.877	7.37757	1.25907	3.23791	1.96779	245	46.12	233.26	50	8491	0	0	0	1	0	1
130000	河北省	地级市	2019	衡水市	74	衡水	衡水2019	衡水市2019	7.92072	12.562	9.98805			0	0	0	33.599	0.22977	64.59	8.10957	1.41322	3.77827	2.21436	164	52.9	238.5	21	5742	0	0	0	1	0	1
130000	河北省	地级市	2020	衡水市	74	衡水	衡水2020	衡水市2020	8.09894	13.2685	10.3825			0	0	0	36.938	0.24018	68.819	8.15755	1.59506	4.03007	2.43931	224	53.53	238.47	13	5635	0	0	0	1	0	1
430000	湖南省	地级市	2006	衡阳市	75	衡阳	衡阳2006	衡阳市2006	101.709	20.4333	49.0167	2018	-12	1	0	0	10.057	0.4353	15.5567	3.72389	0.200295	1.45441	0	11	35.99	212.45	0	0	0	0	0	1	0	0
430000	湖南省	地级市	2007	衡阳市	75	衡阳	衡阳2007	衡阳市2007	86.52	21.5248	45.4103	2018	-11	1	0	0	12.232	0.4353	19.715	3.78539	0.596932	1.36794	0	13	36.51	213.07	3	5283	0	0	0	1	0	0
430000	湖南省	地级市	2008	衡阳市	75	衡阳	衡阳2008	衡阳市2008	80.8285	29.9136	50.5992	2018	-10	1	0	0	14.858	0.4637	23.1961	3.79355	0.565971	1.29151	0	15	35.19	211.6	10	6500	0	0	0	1	0	0
430000	湖南省	地级市	2009	衡阳市	75	衡阳	衡阳2009	衡阳市2009	67.6133	29.0211	45.1326	2018	-9	1	0	0	17.299	0.5009	25.3932	3.99076	0.531053	1.34133	0	20	36.57	215.98	12	6869	0	0	0	1	0	0
430000	湖南省	地级市	2010	衡阳市	75	衡阳	衡阳2010	衡阳市2010	61.1121	31.9645	44.6804	2018	-8	1	0	0	20.419	0.5169	27.6134	5.34329	0.59374	1.28885	0	33	35.92	217.3	13	6231	0	0	0	1	0	0
430000	湖南省	地级市	2011	衡阳市	75	衡阳	衡阳2011	衡阳市2011	50.1743	27.8006	37.6367	2018	-7	1	0	0	24.231	0.5536	30.9426	5.99986	0.478784	1.23278	0	45	34.63	217.85	19	6521	0	0	0	1	0	0
430000	湖南省	地级市	2012	衡阳市	75	衡阳	衡阳2012	衡阳市2012	49.8081	39.3826	44.3524	2018	-6	1	0	0	27.258	0.566	33.5425	6.92174	0.492843	1.268	0	60	35.01	218.52	7	4961	0	0	0	1	0	0
430000	湖南省	地级市	2013	衡阳市	75	衡阳	衡阳2013	衡阳市2013	45.1179	32.8524	38.5873	2018	5	1	0	0	27.601	0.578	36.36	7.24609	0.527417	1.36026	0	95	36.49	220.89	25	6881	0	0	0	1	0	0
430000	湖南省	地级市	2014	衡阳市	75	衡阳	衡阳2014	衡阳市2014	48.8845	37.6813	42.9915	2018	4	1	0	0	32.934	0.56404	40.3416	7.23868	0.477088	1.39631	0	80	38.28	223.29	10	5085	0	0	0	1	0	0
430000	湖南省	地级市	2015	衡阳市	75	衡阳	衡阳2015	衡阳市2015	42.738	43.8483	43.2903	2018	3	1	0	0	35.538	0.54048	44.983	7.48168	0.427829	1.48404	0	106	40.16	224.96	12	5291	0	0	0	1	0	0
430000	湖南省	地级市	2016	衡阳市	75	衡阳	衡阳2016	衡阳市2016	35.5508	49.5364	42.0781	2018	6	1	0	0	39.02	0.53514	50.768	7.1738	0.397427	1.59523	0	149	43.38	228.29	11	5556	0	0	0	1	0	0
430000	湖南省	地级市	2017	衡阳市	75	衡阳	衡阳2017	衡阳市2017	23.7473	50.1449	34.908	2018	-1	1	0	0	40.321	0.52113	55.761	5.5591	0.610863	1.77315	0	206			15	5920	0	0	0	1	0	0
430000	湖南省	地级市	2018	衡阳市	75	衡阳	衡阳2018	衡阳市2018	25.0743	41.8466	32.5568	2018	0	1	1	1	42.163	0.46244	62.328	5.29703	0.833255	1.8084	0	222	55.33	244.25	22	6677	0	0	0	1	0	0
430000	湖南省	地级市	2019	衡阳市	75	衡阳	衡阳2019	衡阳市2019	24.382	43.9623	32.9625	2018	1	1	1	1	46.379	0.50013	66.236	5.04604	0.868353	1.80133	0	142	56.36	245.07	15	6522	0	0	0	1	0	0
430000	湖南省	地级市	2020	衡阳市	75	衡阳	衡阳2020	衡阳市2020	26.6443	48.9461	36.4	2018	2	1	1	1	52.55	0.5119	70.24	4.94357	2.00073	1.94232	0	214	54.37	241.77	5	6802	0	0	0	1	0	0
150000	内蒙古自治区	地级市	2006	呼和浩特市	76	呼和	呼和2006	呼和浩特市2006	17.6581	0.38582	2.69571	2011	5	1	0	0	34.71	0.2999	22.9475	5.05732	0.118459	1.77531	0.90093	16	55.29	249.48	8	7300	0	0	0	0	1	0
150000	内蒙古自治区	地级市	2007	呼和浩特市	76	呼和	呼和2007	呼和浩特市2007	16.8283	1.04373	4.29164	2011	4	1	0	0	42.016	0.2993	26.7349	5.26383	0.711349	2.26883	1.11307	25	56.62	250.96	19	6972	0	0	0	0	1	0
150000	内蒙古自治区	地级市	2008	呼和浩特市	76	呼和	呼和2008	呼和浩特市2008	17.4876	1.292	4.8647	2011	3	1	0	0	49.606	0.3144	30.8718	6.24793	1.11263	2.36137	1.38481	29	56.16	250.45	20	8491	0	0	0	0	1	0
150000	内蒙古自治区	地级市	2009	呼和浩特市	76	呼和	呼和2009	呼和浩特市2009	14.0819	1.38537	4.49055	2011	6	1	0	0	61.108	0.3159	33.9928	6.49606	1.06534	2.49161	1.74063	36	59.16	254.41	13	8063	0	0	0	0	1	0
150000	内蒙古自治区	地级市	2010	呼和浩特市	76	呼和	呼和2010	呼和浩特市2010	15.5512	5.48249	9.29222	2011	-1	1	0	0	66.929	0.315	37.6935	6.79428	1.08608	2.78791	2.1189	37	58.71	253.81	10	7482	0	0	0	0	1	0
150000	内蒙古自治区	地级市	2011	呼和浩特市	76	呼和	呼和2011	呼和浩特市2011	19.5466	5.10682	10.1068	2011	0	1	1	1	75.266	0.3246	42.7969	6.95483	0.871677	2.93489	2.6061	75	58.69	253.66	17	7505	0	0	0	0	1	0
150000	内蒙古自治区	地级市	2012	呼和浩特市	76	呼和	呼和2012	呼和浩特市2012	27.0411	2.79442	8.96612	2011	1	1	1	1	84.534	0.343	65.6371	7.21631	0.840369	3.03485	3.08952	75	58.68	253.81	14	6521	0	0	0	0	1	0
150000	内蒙古自治区	地级市	2013	呼和浩特市	76	呼和	呼和2013	呼和浩特市2013	17.5975	2.67003	6.9672	2011	2	1	1	1	115.829	0.415	48.7973	6.71555	1.0613	3.21396	3.55398	118	63.05	258.08	16	7104	0	0	0	0	1	0
150000	内蒙古自治区	地级市	2014	呼和浩特市	76	呼和	呼和2014	呼和浩特市2014	10.7634	1.7591	4.39288	2011	-3	1	1	1	95.961	0.4215	50.4689	7.30944	1.15806	3.41032	3.90469	128	66.36	262.04	23	7467	0	0	0	0	1	0
150000	内蒙古自治区	地级市	2015	呼和浩特市	76	呼和	呼和2015	呼和浩特市2015	9.77112	1.43253	3.77616	2011	-4	1	1	1	101.492	0.41568	53.698	8.00519	0.707177	3.70117	4.25096	164	67.86	263.78	30	7889	0	0	0	0	1	0
150000	内蒙古自治区	地级市	2016	呼和浩特市	76	呼和	呼和2016	呼和浩特市2016	12.0194	1.98549	4.93685	2011	-5	1	1	1	103.235	0.41144	56.213	8.49678	1.01835	4.16899	4.70303	210	68.56	264.94	31	8122	0	0	0	0	1	0
150000	内蒙古自治区	地级市	2017	呼和浩特市	76	呼和	呼和2017	呼和浩特市2017	11.6765	6.33292	8.61642	2011	-2	1	1	1	98.132	0.40232	63.084	6.63153	0.908282	4.59385	5.28184	222			30	7698	0	0	0	0	1	0
150000	内蒙古自治区	地级市	2019	呼和浩特市	76	呼和	呼和2019	呼和浩特市2019	11.7438	6.10529	8.48666	2011	8	1	1	1	89.138	0.44863	84.105	7.27757	1.71964	5.15592	6.64308	304	66.41	262.36	22	5864	0	0	0	0	1	0
150000	内蒙古自治区	地级市	2020	呼和浩特市	76	呼和	呼和2020	呼和浩特市2020	9.26723	6.04753	7.49257	2011	9	1	1	1	81.656	0.4379	89.549	7.75089	1.03213	5.36084	7.31793	449	66.33	261.78	34	5896	0	0	0	0	1	0
150000	内蒙古自治区	地级市	2018	呼和浩特市	76	呼和	呼和2018	呼和浩特市2018	12.5505	5.99634	8.70072	2011	7	1	1	1	93.029	0.42067	71.387	7.05079	0.936173	4.72776	5.90338	434	68.67	264.94	33	8658	0	0	0	0	1	0
150000	内蒙古自治区	地级市	2006	呼伦贝尔市	77	呼伦	呼伦2006	呼伦贝尔市2006	1.58739	0.35174	0.769705			0	0	0	14.628	0.3675	15.077	5.72389	0.166441	1.44593	0	5	43.17	218.52	15	6663	0	0	0	0	0	1
150000	内蒙古自治区	地级市	2007	呼伦贝尔市	77	呼伦	呼伦2007	呼伦贝尔市2007	1.60501	0.89939	1.20177			0	0	0	18.687	0.3764	17.7167	5.74173	0.844677	1.22462	0	4	42.46	218.03	15	6242	0	0	0	0	0	1
150000	内蒙古自治区	地级市	2008	呼伦贝尔市	77	呼伦	呼伦2008	呼伦贝尔市2008	1.35731	1.49092	1.42256			0	0	0	23.413	0.3692	22.1086	6.61363	0.950585	1.17162	0	4	40.81	218.05	35	7512	0	0	0	0	0	1
150000	内蒙古自治区	地级市	2009	呼伦贝尔市	77	呼伦	呼伦2009	呼伦贝尔市2009	1.31676	2.12405	1.67278			0	0	0	28.882	0.3577	28.2477	6.32579	0.865613	1.2725	0	2	41.12	221.27	14	6205	0	0	0	0	0	1
150000	内蒙古自治区	地级市	2010	呼伦贝尔市	77	呼伦	呼伦2010	呼伦贝尔市2010	1.08945	2.37111	1.60822			0	0	0	34.452	0.3543	31.2235	6.0069	0.762987	1.27987	0	7	38.31	218.74	15	6466	0	0	0	0	0	1
150000	内蒙古自治区	地级市	2011	呼伦贝尔市	77	呼伦	呼伦2011	呼伦贝尔市2011	2.03734	2.79894	2.38833			0	0	0	45.038	0.355	37.0781	5.6671	0.795094	1.18879	0	9	36.74	218.02	11	6295	0	0	0	0	0	1
150000	内蒙古自治区	地级市	2012	呼伦贝尔市	77	呼伦	呼伦2012	呼伦贝尔市2012	1.75783	1.70737	1.73242			0	0	0	52.649	0.368	44.6879	5.94111	0.816666	1.15785	0	2	34.95	217.05	10	4929	0	0	1	0	0	1
150000	内蒙古自治区	地级市	2013	呼伦贝尔市	77	呼伦	呼伦2013	呼伦贝尔市2013	2.40595	2.66108	2.53034			0	0	0	56.544	0.383	48.35	6.09139	0.998006	1.20908	0	20	33.92	215.53	25	5857	0	0	1	0	0	1
150000	内蒙古自治区	地级市	2014	呼伦贝尔市	77	呼伦	呼伦2014	呼伦贝尔市2014	2.1747	2.87871	2.50237			0	0	0	60.152	0.3819	49.6403	6.30875	1.01512	1.24146	0	10	37.21	220	15	5137	0	0	1	0	0	1
150000	内蒙古自治区	地级市	2015	呼伦贝尔市	77	呼伦	呼伦2015	呼伦贝尔市2015	1.50981	2.75574	2.04071			0	0	0	63.131	0.37807	48.001	6.46251	1.06301	1.3694	0	10	39.06	222.57	17	5490	0	0	1	0	0	1
150000	内蒙古自治区	地级市	2016	呼伦贝尔市	77	呼伦	呼伦2016	呼伦贝尔市2016	1.60869	3.0479	2.21556			0	0	0	64.14	0.42997	58.386	6.5414	0.831733	1.5724	0	19	40	224.67	27	6754	0	0	1	0	0	1
150000	内蒙古自治区	地级市	2017	呼伦贝尔市	77	呼伦	呼伦2017	呼伦贝尔市2017	0.97515	8.98605	2.9902			0	0	0	56.834	0.346	64.449	5.93313	0.433764	1.89636	0	23			24	4888	0	0	1	0	0	1
150000	内蒙古自治区	地级市	2018	呼伦贝尔市	77	呼伦	呼伦2018	呼伦贝尔市2018	0.81037	9.96335	2.87785			0	0	0	49.529	0.33593	70.832	6.86729	0.341655	2.22194	0	47	49.27	227.79	33	6416	0	0	1	0	0	1
150000	内蒙古自治区	地级市	2019	呼伦贝尔市	77	呼伦	呼伦2019	呼伦贝尔市2019	0.71409	9.6186	2.65435			0	0	0	47.116	0.32205	76.376	7.03774	0.295693	2.40104	0	20	48.73	225.34	28	6110	0	0	1	0	0	1
150000	内蒙古自治区	地级市	2020	呼伦贝尔市	77	呼伦	呼伦2020	呼伦贝尔市2020	0.71116	6.84079	1.78984			0	0	0	45.923	0.29653	78.803	6.80887	0.269193	2.56522	0	81	47.27	222.44	45	6280	0	0	1	0	0	1
210000	辽宁省	地级市	2006	葫芦岛市	78	葫芦	葫芦2006	葫芦岛市2006	3.27489	2.82709	3.04289			0	0	0	12.672	0.2334	15.287	5.15736	0.12923	2.27655	0.60062	9	37.91	224.1	6	5323	0	0	0	1	0	0
210000	辽宁省	地级市	2007	葫芦岛市	78	葫芦	葫芦2007	葫芦岛市2007	2.8249	2.27456	2.53503			0	0	0	14.965	0.2366	18.4687	5.90369	0.367109	1.94928	0.742048	21	36.78	222.98	13	4863	0	0	0	1	0	0
210000	辽宁省	地级市	2008	葫芦岛市	78	葫芦	葫芦2008	葫芦岛市2008	3.89453	1.81522	2.66144			0	0	0	16.351	0.2334	21.2242	6.85921	0.56756	2.02381	0.923204	13	38.82	224.51	12	5185	0	0	0	1	0	0
210000	辽宁省	地级市	2009	葫芦岛市	78	葫芦	葫芦2009	葫芦岛市2009	2.88925	1.77584	2.2659			0	0	0	15.856	0.2209	24.2373	8.37346	0.560501	2.56037	1.16042	18	42.42	228.52	10	5595	0	0	0	1	0	0
210000	辽宁省	地级市	2010	葫芦岛市	78	葫芦	葫芦2010	葫芦岛市2010	2.70208	3.4793	3.06654			0	0	0	20.302	0.2263	26.0429	10.5264	0.859515	2.49459	1.4126	24	40.04	226.56	13	4826	0	0	0	1	0	0
210000	辽宁省	地级市	2011	葫芦岛市	78	葫芦	葫芦2011	葫芦岛市2011	5.0894	4.21339	4.6312			0	0	0	24.789	0.2222	31.4929	10.8152	1.14834	2.30978	1.7374	25	39	226	11	3864	0	0	0	1	0	0
210000	辽宁省	地级市	2012	葫芦岛市	78	葫芦	葫芦2012	葫芦岛市2012	6.61573	4.90302	5.69716			0	0	0	27.709	0.204	36.0385	11.6744	1.23205	2.35626	2.05968	23	39	225.67	6	4058	0	0	1	1	0	0
210000	辽宁省	地级市	2013	葫芦岛市	78	葫芦	葫芦2013	葫芦岛市2013	13.2589	0.14192	0.769705			0	0	0	27.682	0.272	39.7209	11.4017	1.31766	2.4994	2.36932	35	39.99	226.88	17	4604	0	0	1	1	0	0
210000	辽宁省	地级市	2014	葫芦岛市	78	葫芦	葫芦2014	葫芦岛市2014	14.5126	0.14192	0.769705			0	0	0	28.021	0.26465	42.2828	11.309	1.37396	2.92204	2.60313	34	42.53	229.37	19	4852	0	0	1	1	0	0
210000	辽宁省	地级市	2015	葫芦岛市	78	葫芦	葫芦2015	葫芦岛市2015	10.57	0.14192	0.769705			0	0	0	28.176	0.24796	47.048	7.93373	0.389712	3.13733	2.83398	30	44.37	229.88	24	5161	0	0	1	1	0	0
210000	辽宁省	地级市	2016	葫芦岛市	78	葫芦	葫芦2016	葫芦岛市2016	12.5798	0.14192	0.769705			0	0	0	25.347	0.21687	50.711	9.3788	0.140898	3.86745	3.13535	30	48.36	231.49	31	5686	0	0	1	1	0	0
210000	辽宁省	地级市	2017	葫芦岛市	78	葫芦	葫芦2017	葫芦岛市2017	7.34008	11.025	9.00408			0	0	0	28.158	0.2015	55.037	10.1407	0.143657	3.93039	3.52123	30			4	3624	0	0	1	1	0	0
210000	辽宁省	地级市	2018	葫芦岛市	78	葫芦	葫芦2018	葫芦岛市2018	12.513	12.4066	12.4597			0	0	0	32.012	0.18666	59.891	10.1216	0.520886	4.03318	3.93559	57	42.52	227.32	19	3997	0	0	1	1	0	0
210000	辽宁省	地级市	2019	葫芦岛市	78	葫芦	葫芦2019	葫芦岛市2019	12.6631	16.3087	14.3789			0	0	0	31.802	0.17359	62.556	10.4449	0.14031	4.66945	4.42872	49	46.08	229.63	6	3922	0	0	1	1	0	0
210000	辽宁省	地级市	2020	葫芦岛市	78	葫芦	葫芦2020	葫芦岛市2020	12.7252	15.5122	14.0545			0	0	0	31.514	0.16485	68.269	9.02829	0.118459	4.95741	4.87862	82	47.92	229.61	7	4438	0	0	1	1	0	0
330000	浙江省	地级市	2006	湖州市	79	湖州	湖州2006	湖州市2006	6.56119	14.2813	9.71541	2013	-7	1	0	0	29.527	0.2676	26.0411	6.54288	0.581749	1.64907	2.10217	35	34.2	225.58	0	0	0	0	0	1	0	1
330000	浙江省	地级市	2007	湖州市	79	湖州	湖州2007	湖州市2007	8.61176	12.1558	10.2391	2013	-6	1	0	0	34.596	0.2921	28.5045	6.91439	3.38487	1.63358	2.59717	43	34.94	227.14	36	6849	0	0	0	1	0	1
330000	浙江省	地级市	2008	湖州市	79	湖州	湖州2008	湖州市2008	14.7018	13.2196	13.9423	2013	5	1	0	0	40.089	0.327	31.4569	6.9197	3.25804	1.71771	3.23121	85	34.66	226.66	0	0	0	0	0	1	0	1
330000	浙江省	地级市	2009	湖州市	79	湖州	湖州2009	湖州市2009	13.0828	11.967	12.5132	2013	4	1	0	0	38.865	0.3395	33.8417	7.26164	2.99419	2.31289	4.06148	107	36.77	228.58	38	10194	0	0	0	1	0	1
330000	浙江省	地级市	2010	湖州市	79	湖州	湖州2010	湖州市2010	12.8761	13.33	13.1012	2013	3	1	0	0	45.323	0.3791	36.4854	7.47202	2.8893	2.50969	4.9441	199	37.07	229.08	18	6722	0	0	0	1	0	1
330000	浙江省	地级市	2011	湖州市	79	湖州	湖州2011	湖州市2011	19.7787	14.8698	17.1641	2013	6	1	0	0	52.477	0.4143	41.1069	8.03392	3.01534	2.50926	6.0809	304	38.56	230.91	36	7717	0	0	0	1	0	1
330000	浙江省	地级市	2012	湖州市	79	湖州	湖州2012	湖州市2012	23.9627	17.5143	20.5113	2013	-1	1	0	0	57.35	0.471	46.2906	8.32485	3.09604	2.45485	7.20889	279	39.37	232	40	7752	0	0	0	1	0	1
330000	浙江省	地级市	2013	湖州市	79	湖州	湖州2013	湖州市2013	24.4748	15.8468	19.7384	2013	0	1	1	1	68.823	0.482	51.6371	8.57747	3.58819	2.6195	8.29262	529	40.17	233.19	23	5740	0	0	0	1	0	1
330000	浙江省	地级市	2014	湖州市	79	湖州	湖州2014	湖州市2014	24.7318	16.5736	20.2857	2013	1	1	1	1	66.917	0.49429	56.4458	8.58078	3.10883	2.59765	9.11094	571	42.77	236.62	26	5066	0	0	0	1	0	1
330000	浙江省	地级市	2015	湖州市	79	湖州	湖州2015	湖州市2015	28.3068	22.3496	25.1736	2013	2	1	1	1	70.894	0.50058	61.201	9.17885	3.06648	2.66016	9.91892	660	44.87	239	29	6256	0	0	0	1	0	1
330000	浙江省	地级市	2016	湖州市	79	湖州	湖州2016	湖州市2016	30.7901	22.722	26.4889	2013	-3	1	1	1	77.11	0.50226	65.051	9.24451	3.22971	2.7216	10.9737	887	46.29	240.71	34	6944	0	0	0	1	0	1
330000	浙江省	地级市	2017	湖州市	79	湖州	湖州2017	湖州市2017	16.7781	22.8088	19.5843	2013	-4	1	1	1	82.952	0.5038	72.335	9.58879	3.47574	2.91982	12.3243	742			31	6967	0	0	0	1	0	1
330000	浙江省	地级市	2018	湖州市	79	湖州	湖州2018	湖州市2018	13.8805	26.3198	19.2052	2013	-5	1	1	1	90.304	0.47372	81.617	10.5586	3.96925	3.084	13.7746	1507	48.46	243.76	32	6364	0	0	0	1	0	1
330000	浙江省	地级市	2019	湖州市	79	湖州	湖州2019	湖州市2019	14.0314	30.7762	20.9444	2013	-2	1	1	1	102.593	0.48977	89.631	10.124	4.00863	3.19738	15.5005	827	44.63	240.38	35	6543	0	0	0	1	0	1
330000	浙江省	地级市	2020	湖州市	79	湖州	湖州2020	湖州市2020	14.4346	32.6193	21.8915	2013	7	1	1	1	95.579	0.51428	97.62	10.5141	4.02648	3.68015	17.0752	921	46.02	241.65	40	7240	0	0	0	1	0	1
430000	湖南省	地级市	2006	怀化市	80	怀化	怀化2006	怀化市2006	21.7703	40.8285	30.0252			0	0	0	7.355	0.241	15.4294	4.05231	0.118459	1.50866	0	10	44.87	222.35	0	0	0	0	0	1	0	1
430000	湖南省	地级市	2007	怀化市	80	怀化	怀化2007	怀化市2007	22.2172	37.6282	29.0529			0	0	0	9.045	0.2435	18.7896	16.883	0.357956	1.45914	0	13	43.04	219.63	0	0	0	0	0	1	0	1
430000	湖南省	地级市	2008	怀化市	80	怀化	怀化2008	怀化市2008	21.336	48.9894	32.7677			0	0	0	10.95	0.2477	22.1048	16.883	0.372161	1.41596	0	7	41.68	220.15	19	6048	0	0	0	1	0	1
430000	湖南省	地级市	2009	怀化市	80	怀化	怀化2009	怀化市2009	16.2123	44.659	27.3669			0	0	0	12.041	0.2462	25.7497	4.56483	0.435502	1.50466	0	16	44.45	228.97	17	5865	0	0	0	1	0	1
430000	湖南省	地级市	2010	怀化市	80	怀化	怀化2010	怀化市2010	19.17	45.292	29.8572			0	0	0	14.371	0.2562	28.752	5.28518	0.431946	1.52822	0	18	42.76	228.32	29	7102	0	0	0	1	0	1
430000	湖南省	地级市	2011	怀化市	80	怀化	怀化2011	怀化市2011	13.9057	37.8853	23.281			0	0	0	17.816	0.2762	32.0991	5.62209	0.396556	1.46688	0	12	40.33	225.04	52	8410	0	0	0	1	0	1
430000	湖南省	地级市	2012	怀化市	80	怀化	怀化2012	怀化市2012	25.985	47.777	35.5093			0	0	0	21.018	0.291	35.2202	6.89993	0.452169	1.50088	0	22	40.62	226.11	17	7255	0	0	0	1	0	1
430000	湖南省	地级市	2013	怀化市	80	怀化	怀化2013	怀化市2013	23.5156	39.3862	30.5809			0	0	0	21.702	0.288	36.8022	6.87209	0.474754	1.56377	0	35	41.95	227.73	24	7041	0	0	0	1	0	1
430000	湖南省	地级市	2014	怀化市	80	怀化	怀化2014	怀化市2014	31.6466	43.4199	37.1496			0	0	0	24.368	0.28446	43.3359	8.47649	0.44033	1.64406	0	26	41.85	227.36	18	6249	0	0	0	1	0	1
430000	湖南省	地级市	2015	怀化市	80	怀化	怀化2015	怀化市2015	44.2514	43.3137	43.7806			0	0	0	26.06	0.26417	49.006	8.70153	0.37964	1.81498	0	58	43.68	229.2	17	5042	0	0	0	1	0	1
430000	湖南省	地级市	2016	怀化市	80	怀化	怀化2016	怀化市2016	47.7763	44.9367	46.3394			0	0	0	28.515	0.26311	54.835	8.79431	0.514816	1.90844	0	59	47.46	233.16	30	6025	0	0	0	1	0	1
430000	湖南省	地级市	2017	怀化市	80	怀化	怀化2017	怀化市2017	7.7293	56.7712	22.1394			0	0	0	28.366	0.25144	62.046	9.7563	1.06919	2.12229	0	65			26	5935	0	0	0	1	0	1
430000	湖南省	地级市	2018	怀化市	80	怀化	怀化2018	怀化市2018	6.7654	48.4913	18.979			0	0	0	30.449	0.25341	66.3	5.92891	1.204	2.06665	0	98	57.04	244.55	17	5483	0	0	0	1	0	1
430000	湖南省	地级市	2019	怀化市	80	怀化	怀化2019	怀化市2019	7.05656	50.4746	19.8113			0	0	0	32.453	0.27776	72.946	5.89283	1.81845	2.09031	0	89	58.37	244.43	9	5014	0	0	0	1	0	1
430000	湖南省	地级市	2020	怀化市	80	怀化	怀化2020	怀化市2020	7.26797	56.8968	21.5412			0	0	0	36.365	0.28332	76.055	5.95513	2.66593	2.28105	0	140	55.86	240.31	9	4263	0	0	0	1	0	1
320000	江苏省	地级市	2006	淮安市	81	淮安	淮安2006	淮安市2006	14.1607	0.80578	3.44805			0	0	0	12.278	0.3248	16.5896	5.67406	0.139481	1.29658	0.60062	30	34.11	215.1	23	7504	0	0	0	1	0	1
320000	江苏省	地级市	2007	淮安市	81	淮安	淮安2007	淮安市2007	10.0974	3.36614	5.85615			0	0	0	14.347	0.3508	19.8402	6.71636	1.5111	1.28889	0.742048	38	34.79	217.72	24	5250	0	0	0	1	0	1
320000	江苏省	地级市	2008	淮安市	81	淮安	淮安2008	淮安市2008	12.3917	5.98361	8.6354			0	0	0	17.104	0.3817	23.9956	7.79146	1.99529	1.25162	0.923204	34	35	219.49	26	8174	0	0	0	1	0	1
320000	江苏省	地级市	2009	淮安市	81	淮安	淮安2009	淮安市2009	14.9405	5.04183	8.73554			0	0	0	20.946	0.3795	28.179	8.59821	1.9564	1.41901	1.16042	74	36.49	221.25	10	5023	0	0	0	1	0	1
320000	江苏省	地级市	2010	淮安市	81	淮安	淮安2010	淮安市2010	16.832	5.01472	9.26645			0	0	0	28.861	0.3928	32.7819	10.1887	0.217433	6.44195	1.4126	55	39.26	225.14	10	4466	0	0	0	1	0	1
320000	江苏省	地级市	2011	淮安市	81	淮安	淮安2011	淮安市2011	21.7321	4.42623	9.96758			0	0	0	35.181	0.4084	36.9842	12.1082	2.1064	1.36195	1.7374	87	39.78	226.54	17	5472	0	0	0	1	0	1
320000	江苏省	地级市	2012	淮安市	81	淮安	淮安2012	淮安市2012	22.6695	4.57558	10.3591			0	0	0	39.992	0.427	41.9708	12.1615	2.18921	1.39308	2.05968	103	40.8	227.89	18	5036	0	0	0	1	0	1
320000	江苏省	地级市	2013	淮安市	81	淮安	淮安2013	淮安市2013	21.7179	4.26161	9.78208			0	0	0	38.985	0.633	45.5227	12.5898	2.30651	1.43629	2.36932	136	41.75	229.09	19	5366	0	0	0	1	0	1
320000	江苏省	地级市	2014	淮安市	81	淮安	淮安2014	淮安市2014	25.1568	4.67989	11.0706			0	0	0	50.736	0.7427	51.3028	12.5647	2.4597	1.47564	2.60313	164	44.08	232.39	25	6773	0	0	0	1	0	1
320000	江苏省	地级市	2015	淮安市	81	淮安	淮安2015	淮安市2015	25.6381	4.72629	11.2372			0	0	0	56.46	0.72516	55.232	12.7613	2.35136	1.5276	2.83398	277	45.93	234.72	22	6283	0	0	0	1	0	1
320000	江苏省	地级市	2016	淮安市	81	淮安	淮安2016	淮安市2016	19.1664	5.57871	10.4445			0	0	0	62.446	0.6875	59.642	10.3514	1.92153	1.76188	3.13535	289	47.74	237.09	28	6634	0	0	0	1	0	1
320000	江苏省	地级市	2017	淮安市	81	淮安	淮安2017	淮安市2017	14.8603	7.0962	10.3049			0	0	0	67.825	0.64533	64.631	6.92747	2.15353	1.86908	3.52123	291			28	6470	0	0	0	1	0	1
320000	江苏省	地级市	2018	淮安市	81	淮安	淮安2018	淮安市2018	14.9886	10.1459	12.346			0	0	0	73.204	0.47138	71.472	6.86636	1.92076	1.92751	3.93559	593	48.16	238.2	52	6613	0	0	0	1	0	1
320000	江苏省	地级市	2019	淮安市	81	淮安	淮安2019	淮安市2019	18.3218	12.2124	14.9809			0	0	0	78.543	0.45932	77.874	6.64712	1.71407	2.06647	4.42872	416	48.25	238.29	33	6493	0	0	0	1	0	1
320000	江苏省	地级市	2020	淮安市	81	淮安	淮安2020	淮安市2020	18.5828	13.7019	15.9712			0	0	0	87.507	0.44945	83.216	6.56415	1.47295	2.35597	4.87862	690	49.29	239.1	32	6790	0	0	0	1	0	1
340000	安徽省	地级市	2006	淮北市	82	淮北	淮北2006	淮北市2006	16.518	1.71069	5.41737			0	0	0	11.015	0.2129	18.6713	5.92417	0.139847	1.82084	0.30031	6	35.11	223.72	13	6723	0	0	0	1	0	0
340000	安徽省	地级市	2007	淮北市	82	淮北	淮北2007	淮北市2007	15.882	1.67553	5.2525			0	0	0	12.674	0.2077	25.3256	5.85672	0.766883	1.69145	0.371024	9	33.72	223.66	9	5919	0	0	0	1	0	0
340000	安徽省	地级市	2008	淮北市	82	淮北	淮北2008	淮北市2008	15.6557	1.947	5.61195			0	0	0	17.029	0.1997	30.0204	5.30545	0.78616	1.57854	0.461602	10	30.16	220.22	8	6851	0	0	0	1	0	0
340000	安徽省	地级市	2009	淮北市	82	淮北	淮北2009	淮北市2009	14.39	1.13526	4.11766			0	0	0	18.096	0.2083	35.562	5.94896	1.2333	1.91753	0.580211	13	29.02	219.42	15	6473	0	0	0	1	0	0
340000	安徽省	地级市	2010	淮北市	82	淮北	淮北2010	淮北市2010	14.8905	1.24981	4.39564			0	0	0	22.309	0.2084	43.0097	6.41146	1.25999	1.89192	0.7063	39	26.61	217.87	23	6461	0	0	0	1	0	0
340000	安徽省	地级市	2011	淮北市	82	淮北	淮北2011	淮北市2011	16.6821	1.1439	4.46875			0	0	0	26.239	0.2182	50.0702	6.86085	1.33438	1.98849	0.8687	31	25.21	216.76	15	5871	0	0	0	1	0	0
340000	安徽省	地级市	2012	淮北市	82	淮北	淮北2012	淮北市2012	21.4171	1.05812	4.91748			0	0	0	29.278	0.223	57.0006	8.35626	1.35883	2.08906	1.02984	82	25.58	217.29	12	6175	0	0	0	1	0	0
340000	安徽省	地级市	2013	淮北市	82	淮北	淮北2013	淮北市2013	18.8017	1.56133	5.54846			0	0	0	32.729	0.286	52.3783	7.20248	1.23306	2.09762	1.18466	110	25.13	217.29	5	3944	0	0	0	1	0	0
340000	安徽省	地级市	2014	淮北市	82	淮北	淮北2014	淮北市2014	26.1247	2.01462	7.50576			0	0	0	35.324	0.27541	52.684	6.95245	1.43551	2.12402	1.30156	90	28.95	221.32	6	5556	0	0	0	1	0	0
340000	安徽省	地级市	2015	淮北市	82	淮北	淮北2015	淮北市2015	25.752	2.69101	8.57243			0	0	0	35.057	0.23218	51.096	7.9211	1.02324	2.28508	1.41699	95	34.1	226.3	13	5796	0	0	0	1	0	0
340000	安徽省	地级市	2016	淮北市	82	淮北	淮北2016	淮北市2016	24.5149	4.04092	10.1683			0	0	0	36.427	0.21466	48.266	7.40598	0.676175	2.64985	1.56767	84	35.95	228.23	21	7306	0	0	0	1	0	0
340000	安徽省	地级市	2017	淮北市	82	淮北	淮北2017	淮北市2017	19.8546	5.44935	10.5177			0	0	0	41.66	0.21559	65.286	6.55182	1.03833	2.45546	1.76061	126			21	6005	0	0	1	1	0	0
340000	安徽省	地级市	2018	淮北市	82	淮北	淮北2018	淮北市2018	21.1103	6.41316	11.7578			0	0	0	43.962	0.20143	72.146	7.13879	0.631729	2.44878	1.96779	121	38.56	231.93	23	6640	0	0	1	1	0	0
340000	安徽省	地级市	2019	淮北市	82	淮北	淮北2019	淮北市2019	23.4487	6.41209	12.4239			0	0	0	47.654	0.19048	78.796	7.00288	0.437611	2.45899	2.21436	123	50.51	243.75	8	6401	0	0	1	1	0	0
340000	安徽省	地级市	2020	淮北市	82	淮北	淮北2020	淮北市2020	21.6927	7.6716	13.0135			0	0	0	56.661	0.18058	85.56	7.15545	1.38098	2.63682	2.43931	262	51.12	243.97	15	6574	0	0	1	1	0	0
340000	安徽省	地级市	2006	淮南市	83	淮南	淮南2006	淮南市2006	15.499	1.79557	5.36475			0	0	0	12.876	0.277	27.4919	6.44482	0.118459	2.27048	0	8	34.86	224.06	23	7895	0	0	0	1	0	1
340000	安徽省	地级市	2007	淮南市	83	淮南	淮南2007	淮南市2007	18.8676	1.83555	6.01745			0	0	0	15.699	0.2827	31.3675	6.76871	1.0043	2.36959	0	13	35.35	225.72	17	5399	0	0	0	1	0	1
340000	安徽省	地级市	2008	淮南市	83	淮南	淮南2008	淮南市2008	20.0691	2.02496	6.52504			0	0	0	19.809	0.2847	37.5516	6.5968	1.21092	2.0713	0	12	30.21	221.52	24	6990	0	0	0	1	0	1
340000	安徽省	地级市	2009	淮南市	83	淮南	淮南2009	淮南市2009	17.3016	1.20752	4.67907			0	0	0	22.169	0.3056	40.0223	7.32836	1.35696	2.41864	0	15	29	220.79	28	7531	0	0	0	1	0	1
340000	安徽省	地级市	2010	淮南市	83	淮南	淮南2010	淮南市2010	21.5917	1.26694	5.39504			0	0	0	26.049	0.327	45.8632	8.58434	1.5651	2.49876	0	35	27.8	220.02	33	7726	0	0	0	1	0	1
340000	安徽省	地级市	2011	淮南市	83	淮南	淮南2011	淮南市2011	22.3441	1.15206	5.24615			0	0	0	30.4	0.3726	51.9099	10.0602	1.83111	2.3626	0	53	27.09	219.21	29	7756	0	0	0	1	0	1
340000	安徽省	地级市	2012	淮南市	83	淮南	淮南2012	淮南市2012	21.2522	1.15017	5.10142			0	0	0	33.489	0.355	57.5502	12.6139	1.96921	2.42548	0	96	28.16	220.41	34	6996	0	0	0	1	0	1
340000	安徽省	地级市	2013	淮南市	83	淮南	淮南2013	淮南市2013	18.2073	1.65405	5.61079			0	0	0	33.72	0.354	58.5971	13.5142	1.95188	2.5495	0	182	29.87	221.8	42	7729	0	0	0	1	0	1
340000	安徽省	地级市	2014	淮南市	83	淮南	淮南2014	淮南市2014	18.4359	2.10029	6.34921			0	0	0	33.361	0.32587	61.7754	9.54777	1.59948	2.69218	0	233	33.78	224.98	26	5131	0	0	0	1	0	1
340000	安徽省	地级市	2015	淮南市	83	淮南	淮南2015	淮南市2015	18.2003	2.81326	7.27564			0	0	0	26.398	0.33012	59.424	8.58005	1.52262	2.6326	0	248	39.53	227.15	23	5339	0	0	0	1	0	1
340000	安徽省	地级市	2016	淮南市	83	淮南	淮南2016	淮南市2016	19.5894	4.09845	9.08899			0	0	0	27.99	0.30404	58.543	10.1101	1.33958	3.05522	0	278	40.55	228.28	30	6643	0	0	0	1	0	1
340000	安徽省	地级市	2017	淮南市	83	淮南	淮南2017	淮南市2017	13.645	5.4769	8.68397			0	0	0	30.54	0.29312	71.218	9.55658	1.51919	3.15573	0	252			30	6154	0	0	0	1	0	1
340000	安徽省	地级市	2018	淮南市	83	淮南	淮南2018	淮南市2018	15.6496	6.40714	10.0636			0	0	0	32.487	0.27946	84.508	9.29838	1.67455	3.09631	0	270	42.63	231.83	25	6577	0	0	0	1	0	1
340000	安徽省	地级市	2019	淮南市	83	淮南	淮南2019	淮南市2019	9.26533	3.94932	6.06586			0	0	0	37.14	0.26585	91.156	8.4421	1.91816	2.86898	0	155	49.27	239.27	25	7065	0	0	0	1	0	1
340000	安徽省	地级市	2020	淮南市	83	淮南	淮南2020	淮南市2020	11.1905	4.52708	7.14373			0	0	0	43.557	0.23968	96.671	7.77984	1.38313	3.04924	0	172	50.04	239.42	13	4709	0	0	0	1	0	1
420000	湖北省	地级市	2006	黄冈市	84	黄冈	黄冈2006	黄冈市2006	65.4129	54.1827	59.6046			0	0	0	6.1	0.3279	13.1222	3.92487	0.30335	1.71063	0	4	36.77	205.8	10	6228	0	0	0	1	0	1
420000	湖北省	地级市	2007	黄冈市	84	黄冈	黄冈2007	黄冈市2007	70.6414	54.3779	62.1264			0	0	0	6.1	0.3591	13.1222	4.2075	0.68515	1.61641	0	5	35.06	203.32	11	5163	0	0	0	1	0	1
420000	湖北省	地级市	2008	黄冈市	84	黄冈	黄冈2008	黄冈市2008	85.441	71.9964	78.5294			0	0	0	6.52	0.3638	15.3492	4.3623	0.882407	1.48148	0	7	33.95	201.91	17	5196	0	0	0	1	0	1
420000	湖北省	地级市	2009	黄冈市	84	黄冈	黄冈2009	黄冈市2009	77.7698	65.1682	71.2782			0	0	0	10.928	0.3671	17.4863	4.40483	0.980315	1.49364	0	9	33.05	203.55	17	4905	0	0	0	1	0	1
420000	湖北省	地级市	2010	黄冈市	84	黄冈	黄冈2010	黄冈市2010	60.0966	66.2606	63.1246			0	0	0	13.421	0.3932	22.014	4.52026	1.14097	1.56829	0	16	33.3	204.66	24	5687	0	0	0	1	0	1
420000	湖北省	地级市	2011	黄冈市	84	黄冈	黄冈2011	黄冈市2011	58.5824	53.8999	56.2048			0	0	0	16.908	0.3657	25.673	4.93796	1.30521	1.5637	0	14	33.32	205.57	22	6291	0	0	0	1	0	1
420000	湖北省	地级市	2012	黄冈市	84	黄冈	黄冈2012	黄冈市2012	62.9809	65.8609	64.4094			0	0	0	19.22	0.363	27.9681	5.27434	1.35496	1.66545	0	36	33.13	205.23	13	6147	0	0	1	1	0	1
420000	湖北省	地级市	2013	黄冈市	84	黄冈	黄冈2013	黄冈市2013	56.6146	51.6062	54.0667			0	0	0	17.767	0.445	30.2633	6.0017	1.64118	1.78128	0	37	34.11	207.34	3	1961	0	0	1	1	0	1
420000	湖北省	地级市	2014	黄冈市	84	黄冈	黄冈2014	黄冈市2014	59.5742	58.2033	58.8858			0	0	0	23.128	0.6566	30.2353	6.58209	1.59672	1.92246	0	51	35.36	210.89	14	5280	0	0	1	1	0	1
420000	湖北省	地级市	2015	黄冈市	84	黄冈	黄冈2015	黄冈市2015	82.9193	46.4758	62.8135			0	0	0	25.262	0.63767	39.165	7.09927	1.68835	2.08602	0	57	37.2	213.31	21	5857	0	0	1	1	0	1
420000	湖北省	地级市	2016	黄冈市	84	黄冈	黄冈2016	黄冈市2016	97.402	43.3872	66.5945			0	0	0	27.373	0.67533	41.497	6.92425	1.72612	2.22551	0	100	39.21	216.31	29	5986	0	0	1	1	0	1
420000	湖北省	地级市	2017	黄冈市	84	黄冈	黄冈2017	黄冈市2017	8.99675	86.8116	30.8035			0	0	0	29.748	0.78315	44.922	6.93759	1.84257	2.31497	0	84			30	6549	0	0	1	1	0	1
420000	湖北省	地级市	2018	黄冈市	84	黄冈	黄冈2018	黄冈市2018	10.5172	76.4291	30.5077			0	0	0	32.124	0.78732	47.091	6.84182	1.94894	2.41165	0	128	40.64	222.16	27	6497	0	0	1	1	0	1
420000	湖北省	地级市	2019	黄冈市	84	黄冈	黄冈2019	黄冈市2019	10.8461	64.6199	27.9579			0	0	0	36.685	0.7912	49.97	6.08712	1.81793	2.35273	0	102	44.91	227.54	13	5320	0	0	1	1	0	1
420000	湖北省	地级市	2020	黄冈市	84	黄冈	黄冈2020	黄冈市2020	14.3011	82.0683	36.6192			0	0	0	35.784	0.53063	67.847	4.7926	1.7763	2.84022	0	268	45.25	225.05	21	5456	0	0	1	1	0	1
340000	安徽省	地级市	2006	黄山市	85	黄山	黄山2006	黄山市2006	44.9636	1.35145	8.4241			0	0	0	12.733	0.0866	17.6238	5.57414	0.234567	1.73954	1.50155	1	47.04	232.1	18	6858	0	0	0	1	0	0
340000	安徽省	地级市	2007	黄山市	85	黄山	黄山2007	黄山市2007	21.1324	1.80784	6.34622			0	0	0	14.43	0.0884	21.7406	6.16208	1.27388	1.79725	1.85512	6	48.3	233.71	16	6590	0	0	0	1	0	0
340000	安徽省	地级市	2008	黄山市	85	黄山	黄山2008	黄山市2008	19.0496	2.13923	6.51894			0	0	0	16.867	0.0916	24.491	6.70456	1.62048	1.81948	2.30801	5	46.86	233.19	27	7438	0	0	0	1	0	0
340000	安徽省	地级市	2009	黄山市	85	黄山	黄山2009	黄山市2009	17.6624	1.26563	4.84125			0	0	0	17.977	0.0938	27.0549	7.78545	1.67892	2.18817	2.90105	7	46.04	232.7	11	7513	0	0	0	1	0	0
340000	安徽省	地级市	2010	黄山市	85	黄山	黄山2010	黄山市2010	15.1128	1.4317	4.73636			0	0	0	20.846	0.0941	30.6602	9.95281	1.92846	2.43563	3.5315	17	43.2	230.5	16	7213	0	0	0	1	0	0
340000	安徽省	地级市	2011	黄山市	85	黄山	黄山2011	黄山市2011	15.1608	1.33302	4.5805			0	0	0	25.582	0.0975	35.9339	12.0112	2.20219	2.39782	4.3435	19	41.99	230.06	26	7707	0	0	0	1	0	0
340000	安徽省	地级市	2012	黄山市	85	黄山	黄山2012	黄山市2012	17.32	1.28824	4.83295			0	0	0	28.773	0.103	40.9091	13.2493	2.29264	2.53163	5.14921	13	42.33	230.91	27	5840	0	0	0	1	0	0
340000	安徽省	地级市	2013	黄山市	85	黄山	黄山2013	黄山市2013	20.476	1.74465	6.13199			0	0	0	31.993	0.117	43.2764	12.6267	2.3242	2.57979	5.9233	36	42.66	231.65	26	6694	0	0	0	1	0	0
340000	安徽省	地级市	2014	黄山市	85	黄山	黄山2014	黄山市2014	18.922	2.27724	6.69744			0	0	0	37.306	0.11407	47.7709	13.4058	2.39444	2.65725	6.50781	48	43.06	232.29	14	5731	0	0	0	1	0	0
340000	安徽省	地级市	2015	黄山市	85	黄山	黄山2015	黄山市2015	18.9088	3.02991	7.69795			0	0	0	38.794	0.11332	55.137	13.4857	2.30867	2.79256	7.08494	70	49.73	239.35	19	6324	0	0	0	1	0	0
340000	安徽省	地级市	2016	黄山市	85	黄山	黄山2016	黄山市2016	17.9403	4.52797	9.11241			0	0	0	41.905	0.11576	59.325	13.1402	2.32444	2.83443	7.83838	74	51.35	241.57	19	7711	0	0	0	1	0	0
340000	安徽省	地级市	2017	黄山市	85	黄山	黄山2017	黄山市2017	7.91811	6.11949	6.96294			0	0	0	44.251	0.11256	68.668	12.2991	2.91299	3.06226	8.80307	62			23	7027	0	0	1	1	0	0
340000	安徽省	地级市	2018	黄山市	85	黄山	黄山2018	黄山市2018	7.226	7.33412	7.27987			0	0	0	48.579	0.12098	76.269	11.4491	3.15385	3.0916	9.83896	80	56.71	248.32	24	9636	0	0	1	1	0	0
340000	安徽省	地级市	2019	黄山市	85	黄山	黄山2019	黄山市2019	10.0025	7.30199	8.55069			0	0	0	57.853	0.12953	78.519	9.91033	3.08892	2.80184	11.0718	48	57.82	250.29	15	7152	0	0	1	1	0	0
340000	安徽省	地级市	2020	黄山市	85	黄山	黄山2020	黄山市2020	10.6582	8.52944	9.53736			0	0	0	63.94	0.12011	82.877	9.87439	3.16439	3.07505	12.1966	78	57.41	249.53	44	8421	0	0	1	1	0	0
420000	湖北省	地级市	2006	黄石市	86	黄石	黄石2006	黄石市2006	25.8686	72.6564	44.5652			0	0	0	15.838	0.3037	13.8211	3.82363	0.239246	1.21099	0.60062	5	39.07	231.14	4	3461	0	0	0	1	0	1
420000	湖北省	地级市	2007	黄石市	86	黄石	黄石2007	黄石市2007	38.2954	69.2362	52.0312			0	0	0	19.409	0.311	15.92	4.22429	0.219147	1.25697	0.742048	15	38.9	230.86	18	6224	0	0	0	1	0	1
420000	湖北省	地级市	2008	黄石市	86	黄石	黄石2008	黄石市2008	55.5581	88.4416	70.6901			0	0	0	22.98	0.3115	17.3747	4.3283	0.201711	1.26969	0.923204	12	39.1	231.65	15	7492	0	0	0	1	0	1
420000	湖北省	地级市	2009	黄石市	86	黄石	黄石2009	黄石市2009	60.0955	74.0215	66.8036			0	0	0	23.56	0.3297	17.2721	4.55396	0.155255	1.63094	1.16042	11	37.13	229.23	17	6194	0	0	0	1	0	1
420000	湖北省	地级市	2010	黄石市	86	黄石	黄石2010	黄石市2010	52.2049	70.1619	60.7017			0	0	0	28.427	0.4385	23.663	4.92694	1.02839	1.71473	1.4126	26	35.01	227.24	22	6077	0	0	0	1	0	1
420000	湖北省	地级市	2011	黄石市	86	黄石	黄石2011	黄石市2011	51.7072	55.7348	53.6925			0	0	0	38.074	0.3168	26.9962	5.81453	1.1558	1.49589	1.7374	39	30.19	222.74	24	8593	0	0	0	1	0	1
420000	湖北省	地级市	2012	黄石市	86	黄石	黄石2012	黄石市2012	61.2744	62.7595	62.0137			0	0	0	42.703	0.321	30.0797	6.30578	1.21843	1.55671	2.05968	32	29.79	221.54	24	7670	0	0	1	1	0	1
420000	湖北省	地级市	2013	黄石市	86	黄石	黄石2013	黄石市2013	50.2393	48.5798	49.4042			0	0	0	43.589	0.334	33.5506	6.86131	1.14523	1.64291	2.36932	52	30.44	222.1	13	5997	0	0	1	1	0	1
420000	湖北省	地级市	2014	黄石市	86	黄石	黄石2014	黄石市2014	45.9077	43.8424	44.8656			0	0	0	49.796	0.3337	37.5148	7.33477	1.18928	1.71061	2.60313	47	32.01	223.39	34	5426	0	0	1	1	0	1
420000	湖北省	地级市	2015	黄石市	86	黄石	黄石2015	黄石市2015	47.1211	41.9621	44.4822			0	0	0	50.053	0.32076	41.655	8.18989	1.07992	1.84714	2.83398	66	35.8	226.96	39	5092	0	0	1	1	0	1
420000	湖北省	地级市	2016	黄石市	86	黄石	黄石2016	黄石市2016	47.6765	44.2191	45.9221			0	0	0	53.033	0.30741	44.549	8.07859	1.82825	1.95703	3.13535	109	36	227.26	48	6123	0	0	1	1	0	1
420000	湖北省	地级市	2017	黄石市	86	黄石	黄石2017	黄石市2017	46.9458	62.169	54.1552			0	0	0	58.641	0.30726	48.801	7.50926	1.39299	1.85464	3.52123	105			42	6057	0	0	1	1	0	1
420000	湖北省	地级市	2018	黄石市	86	黄石	黄石2018	黄石市2018	41.9745	57.6071	49.3132			0	0	0	64.249	0.29976	54.437	7.37186	1.91836	1.8558	3.93559	193	35.41	229.38	16	6166	0	0	1	1	0	1
420000	湖北省	地级市	2019	黄石市	86	黄石	黄石2019	黄石市2019	40.1336	47.9176	43.8883			0	0	0	71.511	0.29974	56.185	6.76549	1.82495	1.84202	4.42872	202	43.18	237.34	16	5861	0	0	1	1	0	1
420000	湖北省	地级市	2020	黄石市	86	黄石	黄石2020	黄石市2020	47.1481	59.4993	53.0517			0	0	0	66.446	0.28847	73.486	5.37684	2.06262	2.1786	4.87862	272	44.3	237.23	11	6286	0	0	1	1	0	1
440000	广东省	地级市	2006	惠州市	87	惠州	惠州2006	惠州市2006	31.8276	20.2582	25.4716			0	0	0	25.043	0.6729	17.464	4.75392	0.388598	1.48399	0	22	33.31	224.96	22	6526	0	0	0	1	0	1
440000	广东省	地级市	2007	惠州市	87	惠州	惠州2007	惠州市2007	48.5079	14.2658	26.9568			0	0	0	28.945	0.7618	19.6441	5.61643	1.19778	1.53584	0	30	33.98	226.9	34	7279	0	0	0	1	0	1
440000	广东省	地级市	2008	惠州市	87	惠州	惠州2008	惠州市2008	21.5602	26.7016	24.0094			0	0	0	33.077	0.7366	22.7288	6.04991	1.53332	1.52243	0	42	34.12	227.11	23	6587	0	0	0	1	0	1
440000	广东省	地级市	2009	惠州市	87	惠州	惠州2009	惠州市2009	23.0039	19.9734	21.4407			0	0	0	35.819	0.7754	25.787	7.17925	1.76368	1.88001	0	75	37.85	231.47	31	6052	0	0	0	1	0	1
440000	广东省	地级市	2010	惠州市	87	惠州	惠州2010	惠州市2010	16.9315	22.6512	19.6033			0	0	0	43.397	0.8039	29.5976	7.58558	1.92722	1.81441	0	105	35.15	229.25	16	7640	0	0	0	1	0	1
440000	广东省	地级市	2011	惠州市	87	惠州	惠州2011	惠州市2011	17.4337	19.7395	18.554			0	0	0	45.331	0.8475	36.0234	7.77949	2.33018	1.73024	0	154	35.99	230.42	26	7756	0	0	0	1	0	1
440000	广东省	地级市	2012	惠州市	87	惠州	惠州2012	惠州市2012	16.4117	23.1195	19.506			0	0	0	50.873	0.89	41.5076	8.48456	1.86188	1.69313	0	263	36.57	231.31	15	5691	0	0	1	1	0	1
440000	广东省	地级市	2013	惠州市	87	惠州	惠州2013	惠州市2013	16.6741	22.8449	19.54			0	0	0	78.086	0.861	47.1259	9.34052	1.69468	1.79646	0	378	37	231.88	23	5321	0	0	1	1	0	1
440000	广东省	地级市	2014	惠州市	87	惠州	惠州2014	惠州市2014	13.5393	25.2674	18.5777			0	0	0	63.657	0.91844	53.5738	10.0236	5.29916	1.77523	0	483	38.74	234.04	25	5844	0	0	1	1	0	1
440000	广东省	地级市	2015	惠州市	87	惠州	惠州2015	惠州市2015	15.1968	27.928	20.6973			0	0	0	66.231	0.91857	58.607	10.8285	4.0724	1.93529	0	592	40.2	235.37	24	6182	0	1	1	1	0	1
440000	广东省	地级市	2016	惠州市	87	惠州	惠州2016	惠州市2016	14.3848	29.952	20.8992			0	0	0	71.605	0.96092	64.766	10.5887	4.28605	2.25659	0	686	41.12	236.09	38	7793	0	1	1	1	0	1
440000	广东省	地级市	2017	惠州市	87	惠州	惠州2017	惠州市2017	7.82099	28.5591	15.1847			0	0	0	80.205	0.98764	70.89	10.1573	4.66545	2.32201	0	818			67	8447	0	1	1	1	0	1
440000	广东省	地级市	2018	惠州市	87	惠州	惠州2018	惠州市2018	8.03713	28.6865	15.4222			0	0	0	85.418	0.95129	77.634	9.57837	4.07438	2.55675	0	1160	43.03	238.74	43	7640	0	1	1	1	0	1
440000	广东省	地级市	2019	惠州市	87	惠州	惠州2019	惠州市2019	10.1591	35.4477	19.3334			0	0	0	86.043	1.00614	83.639	9.59675	4.09583	2.81018	0	759	43.16	238.26	22	6550	0	1	1	1	0	1
440000	广东省	地级市	2020	惠州市	87	惠州	惠州2020	惠州市2020	11.741	33.6839	20.1613			0	0	0	70.191	1.03018	89.84	9.76608	3.85337	3.23216	0	971	44.25	239.06	12	7457	0	1	1	1	0	1
230000	黑龙江省	地级市	2006	鸡西市	88	鸡西	鸡西2006	鸡西市2006	4.57956	1.54833	2.66816			0	0	0	12.36	0.3134	14.9844	4.07575	0.222074	1.81309	0	9	39.46	208.82	7	4699	0	0	0	1	0	0
230000	黑龙江省	地级市	2007	鸡西市	88	鸡西	鸡西2007	鸡西市2007	3.06247	1.21538	1.93128			0	0	0	13.858	0.2979	16.1332	4.14326	0.640137	1.69693	0	4	41.64	214.73	11	6252	0	0	0	1	0	0
230000	黑龙江省	地级市	2008	鸡西市	88	鸡西	鸡西2008	鸡西市2008	3.14534	2.82064	2.97863			0	0	0	16.541	0.2807	18.7838	4.68986	0.65184	1.76658	0	9	40.97	214.39	19	5411	0	0	0	1	0	0
230000	黑龙江省	地级市	2009	鸡西市	88	鸡西	鸡西2009	鸡西市2009	2.99608	3.0828	3.03913			0	0	0	18.547	0.2782	23.4376	5.19541	0.666653	1.96593	0	10	34.26	207.65	13	5754	0	0	0	1	0	0
230000	黑龙江省	地级市	2010	鸡西市	88	鸡西	鸡西2010	鸡西市2010	3.42549	4.3167	3.84586			0	0	0	22.083	0.2766	28.8415	6.19245	0.699024	1.86344	0	6	32.14	206.59	6	5673	0	0	0	1	0	0
230000	黑龙江省	地级市	2011	鸡西市	88	鸡西	鸡西2011	鸡西市2011	1.9112	2.17311	2.03799			0	0	0	26.864	0.2748	31.1381	6.93706	0.762045	1.78031	0	8	31.57	205.09	8	5879	0	0	0	1	0	0
230000	黑龙江省	地级市	2012	鸡西市	88	鸡西	鸡西2012	鸡西市2012	2.81663	4.75953	3.6637			0	0	0	31.076	0.274	37.5335	7.43108	1.30784	1.79548	0	11	30.71	202.32	12	7248	0	0	0	1	0	0
230000	黑龙江省	地级市	2013	鸡西市	88	鸡西	鸡西2013	鸡西市2013	2.70735	6.50918	4.20649			0	0	0	30.53	0.19	38.5233	7.76794	0.494299	2.04369	0	17	32.29	203.11	11	4521	0	0	0	1	0	0
230000	黑龙江省	地级市	2014	鸡西市	88	鸡西	鸡西2014	鸡西市2014	2.81417	5.18115	3.82186			0	0	0	27.881	0.24536	40.4291	8.31976	0.614209	2.5371	0	21	35.87	201.49	6	3913	0	0	0	1	0	0
230000	黑龙江省	地级市	2015	鸡西市	88	鸡西	鸡西2015	鸡西市2015	1.15509	4.89403	2.3853			0	0	0	28.222	0.28275	39.891	6.71146	0.688928	2.95143	0	13	37.61	201.18	6	3947	0	0	0	1	0	0
230000	黑龙江省	地级市	2016	鸡西市	88	鸡西	鸡西2016	鸡西市2016	1.06219	5.53722	2.4358			0	0	0	28.647	0.25773	47.866	7.00977	0.29909	3.33141	0	22	40.08	204.43	13	4326	0	0	0	1	0	0
230000	黑龙江省	地级市	2017	鸡西市	88	鸡西	鸡西2017	鸡西市2017	3.03202	7.07523	4.64137			0	0	0	29.369	0.21531	54.626	7.25564	0.362182	3.55783	0	21			13	5793	0	0	0	1	0	0
230000	黑龙江省	地级市	2018	鸡西市	88	鸡西	鸡西2018	鸡西市2018	2.1833	8.73554	4.39096			0	0	0	30.784	0.19241	59.077	6.38036	0.293574	3.57374	0	34	40.55	205.2	5	5882	0	0	0	1	0	0
230000	黑龙江省	地级市	2019	鸡西市	88	鸡西	鸡西2019	鸡西市2019	3.9627	9.74272	6.2332			0	0	0	32.278	0.15076	63.528	6.02726	0.313008	3.67483	0	8	40.65	203.44	10	4499	0	0	0	1	0	0
230000	黑龙江省	地级市	2020	鸡西市	88	鸡西	鸡西2020	鸡西市2020	2.47902	8.50571	4.61253			0	0	0	34.031	0.13588	62.287	5.88463	0.721211	3.92632	0	22	39.16	201.57	5	4654	0	0	0	1	0	0
360000	江西省	地级市	2006	吉安市	89	吉安	吉安2006	吉安市2006	24.9192	19.5647	22.0974			0	0	0	7.507	0.2168	13.1222	5.8312	0.167352	1.6569	1.20124	1	35.93	211.49	9	5168	0	0	0	1	0	1
360000	江西省	地级市	2007	吉安市	89	吉安	吉安2007	吉安市2007	20.6814	15.3469	17.8328			0	0	0	8.559	0.2028	15.325	6.23689	0.475438	1.58338	1.4841	2	33.4	209.45	0	0	0	0	0	1	0	1
360000	江西省	地级市	2008	吉安市	89	吉安	吉安2008	吉安市2008	19.9471	29.163	24.1694			0	0	0	10.571	0.1957	19.0361	6.42329	0.580721	1.5223	1.84641	4	30.03	206.3	0	0	0	0	0	1	0	1
360000	江西省	地级市	2009	吉安市	89	吉安	吉安2009	吉安市2009	16.1283	15.0817	15.5969			0	0	0	12.137	0.1998	20.6108	6.80366	0.52004	1.72832	2.32084	12	29.29	207.16	0	0	0	0	0	1	0	1
360000	江西省	地级市	2010	吉安市	89	吉安	吉安2010	吉安市2010	24.5248	15.7201	19.6813			0	0	0	14.969	0.2015	23.0969	7.92432	0.487817	1.71084	2.8252	19	29.67	209.82	7	3252	0	0	0	1	0	1
360000	江西省	地级市	2011	吉安市	89	吉安	吉安2011	吉安市2011	11.7018	10.5699	11.1222			0	0	0	16.83	0.2195	27.2625	8.73787	0.504821	1.70274	3.4748	18	28.36	209.71	39	8290	0	0	0	1	0	1
360000	江西省	地级市	2012	吉安市	89	吉安	吉安2012	吉安市2012	14.3608	14.7638	14.561			0	0	0	18.66	0.229	33.2116	10.2851	0.473386	1.84111	4.11936	17	30.33	212.39	16	6342	0	0	0	1	0	1
360000	江西省	地级市	2013	吉安市	89	吉安	吉安2013	吉安市2013	15.9876	13.8246	14.8697			0	0	0	22.081	0.343	39.3008	10.8053	1.94423	1.96411	4.73864	23	31.67	214.49	18	6310	0	0	0	1	0	1
360000	江西省	地级市	2014	吉安市	89	吉安	吉安2014	吉安市2014	25.5526	14.4508	19.2893			0	0	0	25.486	0.35956	43.1686	11.4779	2.12629	2.07164	5.20625	51	32.51	216.1	35	7545	0	0	0	1	0	1
360000	江西省	地级市	2015	吉安市	89	吉安	吉安2015	吉安市2015	24.8382	17.8149	21.065			0	0	0	27.168	0.38307	48.312	12.1732	2.09104	2.25363	5.66795	39	34.16	217.78	34	7878	0	0	0	1	0	1
360000	江西省	地级市	2016	吉安市	89	吉安	吉安2016	吉安市2016	25.1428	18.8122	21.7724			0	0	0	29.772	0.37316	52.402	10.7448	1.92902	2.43973	6.2707	128	35.53	219.57	38	7525	0	0	0	1	0	1
360000	江西省	地级市	2017	吉安市	89	吉安	吉安2017	吉安市2017	4.84007	19.2135	9.75753			0	0	0	32.487	0.38097	54.256	9.77291	2.00282	2.60928	7.04245	139			29	4968	0	0	1	1	0	1
360000	江西省	地级市	2018	吉安市	89	吉安	吉安2018	吉安市2018	4.90486	17.2734	9.29059			0	0	0	35.202	0.36039	60.643	9.66298	2.37712	2.69249	7.87117	286	42.71	230.77	36	6613	0	0	1	1	0	1
360000	江西省	地级市	2019	吉安市	89	吉安	吉安2019	吉安市2019	5.28313	21.2659	10.7403			0	0	0	42.06	0.40501	68.643	8.53506	2.37815	2.57233	8.85744	185	44.4	234.16	24	6500	0	1	1	1	0	1
360000	江西省	地级市	2020	吉安市	89	吉安	吉安2020	吉安市2020	5.27938	20.341	10.4886			0	0	0	48.307	0.37926	70.103	8.22336	2.6297	2.80037	9.75724	273	44.88	234.04	28	6389	0	1	1	1	0	1
220000	吉林省	地级市	2006	吉林市	90	吉林	吉林2006	吉林市2006	5.62361	7.23534	6.38037	2018	-12	1	0	0	16.796	0.3565	17.2091	3.7964	0.311049	1.6595	1.50155	33	39.28	224.23	13	6543	0	0	0	1	0	0
220000	吉林省	地级市	2007	吉林市	90	吉林	吉林2007	吉林市2007	6.66178	9.25115	7.85453	2018	-11	1	0	0	23.277	0.3409	23.0402	4.05161	0.820608	1.29105	1.85512	36	37.27	223.82	5	4660	0	0	0	1	0	0
220000	吉林省	地级市	2008	吉林市	90	吉林	吉林2008	吉林市2008	8.73935	19.6628	13.1791	2018	-10	1	0	0	30.016	0.335	27.1185	4.10211	0.930797	1.13204	2.30801	37	38.31	225.51	13	5848	0	0	0	1	0	0
220000	吉林省	地级市	2009	吉林市	90	吉林	吉林2009	吉林市2009	12.4046	11.7726	12.0847	2018	-9	1	0	0	34.583	0.3309	29.2992	4.06507	1.777	1.20107	2.90105	39	39.33	227.96	0	0	0	0	0	1	0	0
220000	吉林省	地级市	2010	吉林市	90	吉林	吉林2010	吉林市2010	8.46687	12.8993	10.4626	2018	-8	1	0	0	41.479	0.3325	30.9919	4.06482	1.12102	1.13868	3.5315	53	39.44	228.64	14	6747	0	0	0	1	0	0
220000	吉林省	地级市	2011	吉林市	90	吉林	吉林2011	吉林市2011	8.90106	8.84827	8.87463	2018	-7	1	0	0	50.914	0.384	35.0917	4.61731	0.986536	1.05105	4.3435	65	39.46	229.5	6	5811	0	0	0	1	0	0
220000	吉林省	地级市	2012	吉林市	90	吉林	吉林2012	吉林市2012	13.4203	7.51211	10.0617	2018	-6	1	0	0	56.244	0.391	40.446	4.8982	1.18274	1.09506	5.14921	63	40.32	230.33	3	5605	0	0	1	1	0	0
220000	吉林省	地级市	2013	吉林市	90	吉林	吉林2013	吉林市2013	15.8114	10.0335	12.6156	2018	5	1	0	0	61.012	0.443	42.0827	5.34768	1.35237	1.18532	5.9233	75	41.46	231.82	15	7593	0	0	1	1	0	0
220000	吉林省	地级市	2014	吉林市	90	吉林	吉林2014	吉林市2014	18.1769	8.16323	12.2404	2018	4	1	0	0	55.548	0.432	45.3655	5.51301	1.72944	1.48891	6.50781	86	42.66	232.28	12	5072	0	0	1	1	0	0
220000	吉林省	地级市	2015	吉林市	90	吉林	吉林2015	吉林市2015	16.7314	6.41357	10.421	2018	3	1	0	0	56.076	0.40022	49.234	5.54856	0.94937	1.7406	7.08494	102	44.03	233.48	2	4532	0	0	1	1	0	0
220000	吉林省	地级市	2016	吉林市	90	吉林	吉林2016	吉林市2016	18.643	7.2304	11.6861	2018	6	1	0	0	57.818	0.39025	53.392	5.52513	0.715237	1.95105	7.83838	119	47.18	237.38	14	4717	0	0	1	1	0	0
220000	吉林省	地级市	2017	吉林市	90	吉林	吉林2017	吉林市2017	21.4441	8.79101	13.8237	2018	-1	1	0	0	55.635	0.37229	59.923	4.49722	0.991005	2.07657	8.80307	101			14	5944	0	0	1	1	0	0
220000	吉林省	地级市	2018	吉林市	90	吉林	吉林2018	吉林市2018	25.2753	10.5089	16.4249	2018	0	1	1	1	53.452	0.34182	66.592	4.71785	0.487883	2.16258	9.83896	147	58.81	252.15	24	5736	0	0	1	1	0	0
220000	吉林省	地级市	2019	吉林市	90	吉林	吉林2019	吉林市2019	28.5987	10.9461	17.873	2018	1	1	1	1	34.335	0.3591	69.766	6.90813	0.417973	3.59128	11.0718	130	52.47	240.92	16	6724	0	0	1	1	0	0
220000	吉林省	地级市	2020	吉林市	90	吉林	吉林2020	吉林市2020	24.9875	10.5954	16.3922	2018	2	1	1	1	35.588	0.33828	71.733	5.85085	0.277945	3.92898	12.1966	184	51	237.17	16	6115	0	0	1	1	0	0
370000	山东省	副省级市	2017	济南市	91	济南	济南2017	济南市2017	17.4864	1.91111	5.8948	2010	7	1	1	1	98.275	1.31209	84.645	9.46931	1.54644	4.03284	21.1274	2093			24	7395	0	1	1	1	1	0
370000	山东省	副省级市	2006	济南市	91	济南	济南2006	济南市2006	8.78309	0.14192	1.12409	2010	4	1	0	0	36.394	1.0126	22.3055	5.87798	0.254259	3.57562	3.60372	181	47.51	240.87	20	7244	0	0	0	1	1	0
370000	山东省	副省级市	2007	济南市	91	济南	济南2007	济南市2007	8.79316	0.14192	1.10078	2010	3	1	0	0	42.424	1.1822	26.6539	6.12683	2.25115	3.02039	4.45229	295	48.95	243.09	28	4932	0	0	0	1	1	0
370000	山东省	副省级市	2008	济南市	91	济南	济南2008	济南市2008	15.7567	1.01929	4.09633	2010	6	1	0	0	45.724	1.206	31.5998	6.16471	2.03607	3.03354	5.53922	356	50.1	244.3	14	6324	0	0	0	1	1	0
370000	山东省	副省级市	2009	济南市	91	济南	济南2009	济南市2009	14.7286	0.61891	3.09049	2010	-1	1	0	0	50.376	1.2326	35.6613	6.27184	2.02468	3.59977	6.96253	468	51.05	245.47	11	5507	0	0	0	1	1	0
370000	山东省	副省级市	2010	济南市	91	济南	济南2010	济南市2010	12.5361	0.76576	3.15389	2010	0	1	1	1	57.966	1.278	37.8539	6.80551	1.84493	3.53649	8.4756	783	52.62	247.1	14	5914	0	0	0	1	1	0
370000	山东省	副省级市	2011	济南市	91	济南	济南2011	济南市2011	12.4181	0.74894	3.10406	2010	1	1	1	1	64.311	1.3308	44.0044	7.38527	1.90358	3.44269	10.4244	1005	53.09	247.69	26	6847	0	0	0	1	1	0
370000	山东省	副省级市	2012	济南市	91	济南	济南2012	济南市2012	15.3971	1.14226	4.28004	2010	2	1	1	1	69.444	1.415	48.829	7.92772	2.17288	3.58157	12.3581	1092	54.39	249.14	19	8267	0	0	0	1	1	0
370000	山东省	副省级市	2013	济南市	91	济南	济南2013	济南市2013	16.1333	1.2007	4.49611	2010	-3	1	1	1	85.321	1.481	55.6424	9.2171	2.09519	3.56021	14.2159	1331	55.3	249.86	12	5812	0	0	0	1	1	0
370000	山东省	副省级市	2014	济南市	91	济南	济南2014	济南市2014	16.2786	1.234	4.57869	2010	-4	1	1	1	82.052	1.42265	62.3226	9.41199	1.67975	3.50963	15.6188	1290	55.78	250.75	22	7397	0	0	0	1	1	0
370000	山东省	副省级市	2015	济南市	91	济南	济南2015	济南市2015	18.145	1.28607	4.9501	2010	-5	1	1	1	85.919	1.31896	68.997	10.0704	1.74373	3.80759	17.0039	1505	57.18	252.19	15	7704	0	0	0	1	1	0
370000	山东省	副省级市	2016	济南市	91	济南	济南2016	济南市2016	14.5995	1.42697	4.64354	2010	-2	1	1	1	90.999	1.35898	77.012	9.81036	1.60048	4.03955	18.8121	1954	58.9	254.03	41	8004	0	1	0	1	1	0
370000	山东省	副省级市	2018	济南市	91	济南	济南2018	济南市2018	20.6568	2.98173	8.00438	2010	8	1	1	1	106.302	1.30172	91.651	9.58201	2.06653	3.98036	23.6135	2630	60.52	257.05	27	7814	0	1	1	1	1	0
370000	山东省	副省级市	2019	济南市	91	济南	济南2019	济南市2019	21.2693	5.21126	10.6698	2010	9	1	1	1	106.416	1.46532	100.593	9.25754	3.60605	3.80466	26.5723	1834	61.79	258.16	11	9192	0	1	1	1	1	0
370000	山东省	副省级市	2020	济南市	91	济南	济南2020	济南市2020	21.2235	5.43384	10.8769	2010	10	1	1	1	110.199	1.54978	108.091	8.93477	3.07631	3.98579	29.2717	3232	61.61	258.04	25	8986	0	1	1	1	1	0
370000	山东省	地级市	2020	济宁市	92	济宁	济宁2020	济宁市2020	10.5534	8.32422	9.37581	2013	7	1	1	1	53.773	0.78551	85.437	9.16292	1.1262	2.5148	7.31793	833	49.11	237.43	21	7078	0	0	0	1	0	1
370000	山东省	地级市	2006	济宁市	92	济宁	济宁2006	济宁市2006	6.7218	0.1915	1.14784	2013	-7	1	0	0	18.563	0.6146	18.9887	5.60078	0.250639	1.18451	0.90093	32	31.98	219.15	21	5906	0	0	0	1	0	1
370000	山东省	地级市	2007	济宁市	92	济宁	济宁2007	济宁市2007	5.93634	0.19159	1.07717	2013	-6	1	0	0	21.992	0.6	23.7523	5.83037	1.81309	1.10973	1.11307	47	32.39	220.09	21	6017	0	0	0	1	0	1
370000	山东省	地级市	2008	济宁市	92	济宁	济宁2008	济宁市2008	6.42076	1.32394	2.92954	2013	5	1	0	0	26.721	0.62	27.9834	5.62854	2.07047	1.09553	1.38481	115	32.13	220.03	25	6889	0	0	0	1	0	1
370000	山东省	地级市	2009	济宁市	92	济宁	济宁2009	济宁市2009	6.52279	0.8088	2.31262	2013	4	1	0	0	27.979	0.6049	30.996	6.01666	1.97036	1.35127	1.74063	106	33.06	220.98	19	6495	0	0	0	1	0	1
370000	山东省	地级市	2010	济宁市	92	济宁	济宁2010	济宁市2010	8.56133	0.85545	2.73344	2013	3	1	0	0	31.561	0.6324	35.8208	6.65615	2.09067	1.42469	2.1189	141	34.05	221.45	26	7080	0	0	0	1	0	1
370000	山东省	地级市	2011	济宁市	92	济宁	济宁2011	济宁市2011	12.09	0.70336	2.96733	2013	6	1	0	0	35.729	0.7157	39.2515	7.14953	1.91318	1.45892	2.6061	205	34.85	222.71	32	7263	0	0	0	1	0	1
370000	山东省	地级市	2012	济宁市	92	济宁	济宁2012	济宁市2012	12.4398	1.21438	3.94417	2013	-1	1	0	0	39.165	0.768	44.5265	7.70141	1.87098	1.58967	3.08952	212	35.87	224.21	16	7176	0	0	0	1	0	1
370000	山东省	地级市	2013	济宁市	92	济宁	济宁2013	济宁市2013	13.2632	1.49593	4.51975	2013	0	1	1	1	41.292	0.923	46.4906	8.63153	1.82102	1.62886	3.55398	338	36.92	224.94	16	5990	0	0	0	1	0	1
370000	山东省	地级市	2014	济宁市	92	济宁	济宁2014	济宁市2014	15.4004	1.49316	4.88349	2013	1	1	1	1	46.213	0.91469	50.4355	8.79451	1.72827	1.61448	3.90469	336	39.58	228.23	25	6394	0	0	0	1	0	1
370000	山东省	地级市	2015	济宁市	92	济宁	济宁2015	济宁市2015	13.3379	1.64404	4.74872	2013	2	1	1	1	48.529	0.87855	54.077	9.18528	1.55971	1.6619	4.25096	444	41.43	230.11	21	6615	0	0	0	1	0	1
370000	山东省	地级市	2016	济宁市	92	济宁	济宁2016	济宁市2016	13.6904	1.83852	5.08609	2013	-3	1	1	1	51.662	0.85225	57.362	9.10119	1.38087	1.7158	4.70303	537	43.51	232.34	19	5277	0	0	0	1	0	1
370000	山东省	地级市	2017	济宁市	92	济宁	济宁2017	济宁市2017	7.32977	2.49967	4.29394	2013	-4	1	1	1	55.43	0.82369	61.909	8.31843	1.26557	1.74246	5.28184	523			16	5543	0	0	0	1	0	1
370000	山东省	地级市	2018	济宁市	92	济宁	济宁2018	济宁市2018	9.25319	4.49822	6.46514	2013	-5	1	1	1	58.972	0.82104	66.16	8.11297	1.20896	1.81178	5.90338	819	44.72	234.74	15	5104	0	0	0	1	0	1
370000	山东省	地级市	2019	济宁市	92	济宁	济宁2019	济宁市2019	9.72524	6.27951	7.82196	2013	-2	1	1	1	52.331	0.72964	77.459	9.26802	1.30266	2.2726	6.64308	517	48.2	236.67	18	6901	0	0	0	1	0	1
230000	黑龙江省	地级市	2006	佳木斯市	93	佳木	佳木2006	佳木斯市2006	5.11998	0.60159	1.76474			0	0	0	11.295	0.3057	13.1222	3.11086	0.15371	1.86198	0	6	49.02	218.24	12	6584	0	0	0	1	0	0
230000	黑龙江省	地级市	2007	佳木斯市	93	佳木	佳木2007	佳木斯市2007	3.83235	0.47599	1.35605			0	0	0	13.69	0.3166	14.9064	2.78661	0.48101	1.59923	0	4	48.65	218.14	13	5826	0	0	0	1	0	0
230000	黑龙江省	地级市	2008	佳木斯市	93	佳木	佳木2008	佳木斯市2008	3.7614	1.17875	2.10948			0	0	0	15.871	0.2938	21.8767	2.78661	0.48102	1.67914	0	44	47.55	215.89	18	4648	0	0	0	1	0	0
230000	黑龙江省	地级市	2009	佳木斯市	93	佳木	佳木2009	佳木斯市2009	4.32962	1.01168	2.09893			0	0	0	17.172	0.2835	23.2204	3.3606	0.372951	1.9064	0	29	45.1	211.56	12	6456	0	0	0	1	0	0
230000	黑龙江省	地级市	2010	佳木斯市	93	佳木	佳木2010	佳木斯市2010	5.84509	1.41209	2.88378			0	0	0	20.254	0.2763	27.033	4.06881	0.345873	1.8993	0	27	45.3	216.74	13	7122	0	0	0	1	0	0
230000	黑龙江省	地级市	2011	佳木斯市	93	佳木	佳木2011	佳木斯市2011	7.15574	1.64561	3.44815			0	0	0	24.853	0.2776	30.4698	5.03423	0.430783	1.83199	0	28	43.16	212.9	6	6407	0	0	0	1	0	0
230000	黑龙江省	地级市	2012	佳木斯市	93	佳木	佳木2012	佳木斯市2012	9.19796	2.10925	4.43208			0	0	0	27.774	0.228	38.1806	5.67793	0.728649	2.00978	0	27	44.01	213.84	5	5600	0	0	0	1	0	0
230000	黑龙江省	地级市	2013	佳木斯市	93	佳木	佳木2013	佳木斯市2013	10.1991	3.04514	5.60204			0	0	0	32.733	0.184	36.0188	5.488	0.314931	1.94157	0	27	41.75	208.31	11	4190	0	0	0	1	0	0
230000	黑龙江省	地级市	2014	佳木斯市	93	佳木	佳木2014	佳木斯市2014	8.35772	2.51543	4.60455			0	0	0	32.864	0.17768	39.5184	5.48478	0.1802	2.3649	0	24	44.68	212.18	6	3198	0	0	0	1	0	0
230000	黑龙江省	地级市	2015	佳木斯市	93	佳木	佳木2015	佳木斯市2015	7.50931	2.31233	4.18245			0	0	0	35.069	0.1801	46.978	4.44162	0.453381	2.93065	0	22	44.92	211.85	12	4896	0	0	0	1	0	0
230000	黑龙江省	地级市	2016	佳木斯市	93	佳木	佳木2016	佳木斯市2016	6.64819	3.61984	4.91121			0	0	0	36.878	0.16628	50.02	4.46926	0.181231	3.28967	0	22	47.28	216.04	25	5318	0	0	0	1	0	0
230000	黑龙江省	地级市	2017	佳木斯市	93	佳木	佳木2017	佳木斯市2017	6.63648	5.58658	6.08963			0	0	0	41.419	0.16092	54.018	4.00664	0.118459	3.11876	0	47			12	5168	0	0	0	1	0	0
230000	黑龙江省	地级市	2018	佳木斯市	93	佳木	佳木2018	佳木斯市2018	9.07584	6.80624	7.8627			0	0	0	39.344	0.24073	53.286	4.07782	0.118459	3.15425	0	64	44.76	209.49	16	6257	0	0	0	1	0	0
230000	黑龙江省	地级市	2019	佳木斯市	93	佳木	佳木2019	佳木斯市2019	8.76221	7.68473	8.20652			0	0	0	32.788	0.22914	50.485	5.64094	0.159101	4.29124	0	19	41.34	195.88	15	4978	0	0	0	1	0	0
230000	黑龙江省	地级市	2020	佳木斯市	93	佳木	佳木2020	佳木斯市2020	5.90752	8.09142	6.9167			0	0	0	35.124	0.16399	57.737	5.73797	0.356653	4.36509	0	44	38.55	195.88	13	4722	0	0	0	1	0	0
330000	浙江省	地级市	2006	嘉兴市	94	嘉兴	嘉兴2006	嘉兴市2006	13.3589	20.3751	16.5278	2010	4	1	0	0	40.206	0.6872	22.625	6.05555	1.00941	2.02576	1.50155	50	33.51	226.96	16	8136	0	0	0	1	0	1
330000	浙江省	地级市	2007	嘉兴市	94	嘉兴	嘉兴2007	嘉兴市2007	14.4316	17.4128	15.8577	2010	3	1	0	0	47.157	0.7221	26.0042	6.63813	3.85682	1.98549	1.85512	61	33.97	227.85	25	8109	0	0	0	1	0	1
330000	浙江省	地级市	2008	嘉兴市	94	嘉兴	嘉兴2008	嘉兴市2008	16.0958	19.5536	17.7479	2010	6	1	0	0	43.129	0.746	29.2196	6.9889	3.84329	2.08786	2.30801	102	34.4	228.59	25	5458	0	0	0	1	0	1
330000	浙江省	地级市	2009	嘉兴市	94	嘉兴	嘉兴2009	嘉兴市2009	13.6906	17.583	15.5244	2010	-1	1	0	0	44.898	0.7601	31.9632	7.388	3.66245	2.70218	2.90105	116	36.39	230.78	23	6056	0	0	0	1	0	1
330000	浙江省	地级市	2010	嘉兴市	94	嘉兴	嘉兴2010	嘉兴市2010	13.751	18.799	16.0935	2010	0	1	1	1	52.143	0.804	36.3174	7.68757	3.78583	2.75822	3.5315	252	36.24	230.72	19	5645	0	0	0	1	0	1
330000	浙江省	地级市	2011	嘉兴市	94	嘉兴	嘉兴2011	嘉兴市2011	20.9543	14.7082	17.5791	2010	1	1	1	1	59.256	0.7905	42.9858	8.45704	3.93837	2.75707	4.3435	347	37.24	231.89	38	6512	0	0	0	1	0	1
330000	浙江省	地级市	2012	嘉兴市	94	嘉兴	嘉兴2012	嘉兴市2012	26.2749	17.1464	21.2753	2010	2	1	1	1	63.704	0.792	48.3293	8.91629	4.01046	2.72354	5.14921	406	39.3	234.06	35	6791	0	0	0	1	0	1
330000	浙江省	地级市	2013	嘉兴市	94	嘉兴	嘉兴2013	嘉兴市2013	20.1441	16.4933	18.2356	2010	-3	1	1	1	90.973	0.798	53.9657	8.96885	3.97434	2.83789	5.9233	578	40.2	235.26	27	4956	0	0	0	1	0	1
330000	浙江省	地级市	2014	嘉兴市	94	嘉兴	嘉兴2014	嘉兴市2014	22.8031	16.8705	19.635	2010	-4	1	1	1	73.458	0.80076	60.3096	9.15907	4.20629	2.95502	6.50781	718	41.58	237.26	13	5012	0	0	0	1	0	1
330000	浙江省	地级市	2015	嘉兴市	94	嘉兴	嘉兴2015	嘉兴市2015	25.3341	22.9521	24.1171	2010	-5	1	1	1	76.85	0.80911	67.689	9.95919	3.85667	2.98304	7.08494	763	43.44	239.49	15	5482	0	0	0	1	0	1
330000	浙江省	地级市	2016	嘉兴市	94	嘉兴	嘉兴2016	嘉兴市2016	24.4993	24.033	24.2652	2010	-2	1	1	1	83.968	0.80546	73.836	10.0446	4.05608	3.05932	7.83838	1086	44.4	240.87	15	5621	0	0	0	1	0	1
330000	浙江省	地级市	2018	嘉兴市	94	嘉兴	嘉兴2018	嘉兴市2018	10.4785	27.1174	17.0169	2010	8	1	1	1	103.858	0.75258	90.342	10.6436	4.05333	3.05317	9.83896	1966	43.77	241.41	23	5729	0	0	1	1	0	1
330000	浙江省	地级市	2019	嘉兴市	94	嘉兴	嘉兴2019	嘉兴市2019	10.5557	31.7087	18.5494	2010	9	1	1	1	112.751	0.73969	97.767	10.5343	4.30818	3.22586	11.0718	1515	43.89	241.66	12	5686	0	0	1	1	0	1
330000	浙江省	地级市	2020	嘉兴市	94	嘉兴	嘉兴2020	嘉兴市2020	10.6746	33.6801	19.26	2010	10	1	1	1	102.541	0.73361	107.614	10.8675	4.77544	3.72327	12.1966	1929	45.83	243.58	12	5842	0	0	1	1	0	1
330000	浙江省	地级市	2017	嘉兴市	94	嘉兴	嘉兴2017	嘉兴市2017	8.1869	24.6219	14.352	2010	7	1	1	1	94.51	0.79134	82.934	10.1311	4.09365	3.04042	8.80307	1151			18	5984	0	0	1	1	0	1
620000	甘肃省	地级市	2006	嘉峪关市	95	嘉峪	嘉峪2006	嘉峪关市2006	15.2113	20.3797	17.623			0	0	0	50.933	0.0645	28.0084	4.58598	0.118459	1.89829	0	1	18.23	216.64	2	4336	0	0	0	0	0	0
620000	甘肃省	地级市	2007	嘉峪关市	95	嘉峪	嘉峪2007	嘉峪关市2007	14.0584	22.1703	17.6939			0	0	0	58.856	0.0645	30.7432	4.64403	0.793135	1.8615	0		18.23	215.93	2	3858	0	0	0	0	0	0
620000	甘肃省	地级市	2008	嘉峪关市	95	嘉峪	嘉峪2008	嘉峪关市2008	12.8145	21.4707	16.6321			0	0	0	69.415	0.0645	36.646	4.75399	0.82466	1.90466	0		18.23	215.58	7	3763	0	0	0	0	0	0
620000	甘肃省	地级市	2009	嘉峪关市	95	嘉峪	嘉峪2009	嘉峪关市2009	12.1336	28.4389	18.7309			0	0	0	76.087	0.0645	39.3847	4.67404	1.05506	2.0923	0	1	19.7	218.28	8	4013	0	0	0	0	0	0
620000	甘肃省	地级市	2010	嘉峪关市	95	嘉峪	嘉峪2010	嘉峪关市2010	13.0481	26.4225	18.6733			0	0	0	83.425	0.0645	46.9923	4.52286	0.903036	1.87407	0	2	18.5	217.16	7	4259	0	0	0	0	0	0
620000	甘肃省	地级市	2011	嘉峪关市	95	嘉峪	嘉峪2011	嘉峪关市2011	11.9023	22.7935	16.5415			0	0	0	101.306	0.0645	53.8338	4.67493	0.712588	1.90069	0		18.23	215.43	8	4381	0	0	0	0	0	0
620000	甘肃省	地级市	2012	嘉峪关市	95	嘉峪	嘉峪2012	嘉峪关市2012	1.7027	33.0868	7.88718			0	0	0	115.123	0.066	51.8344	4.77574	0.677215	2.07848	0	5	18.23	215.4	8	4607	0	0	0	0	0	0
620000	甘肃省	地级市	2013	嘉峪关市	95	嘉峪	嘉峪2013	嘉峪关市2013	1.58652	38.6483	8.32937			0	0	0	113.109	0.066	53.397	6.77821	0.662322	2.86279	0	9	23.86	222.21	7	4146	0	0	0	0	0	0
620000	甘肃省	地级市	2014	嘉峪关市	95	嘉峪	嘉峪2014	嘉峪关市2014	1.31265	43.228	8.1146			0	0	0	101.955	0.06989	53.4373	6.50707	0.875002	2.83134	0	14	28.57	226.94	12	4217	0	0	0	0	0	0
620000	甘肃省	地级市	2015	嘉峪关市	95	嘉峪	嘉峪2015	嘉峪关市2015	4.10417	19.8645	9.1622			0	0	0	78.336	0.07287	53.998	7.96131	0.726708	3.93277	0	22	40.68	238.48	15	3687	0	0	0	0	0	0
620000	甘肃省	地级市	2016	嘉峪关市	95	嘉峪	嘉峪2016	嘉峪关市2016	2.15627	43.6192	10.3614			0	0	0	62.641	0.07751	66.925	11.1432	0.317596	5.35453	0	24	57.79	254.9	15	4664	0	0	0	0	0	0
620000	甘肃省	地级市	2017	嘉峪关市	95	嘉峪	嘉峪2017	嘉峪关市2017	1.08917	51.6493	8.2547			0	0	0	84.677	0.08086	78.48	8.75123	0.350916	3.94384	0	40			30	6783	0	0	0	0	0	0
620000	甘肃省	地级市	2018	嘉峪关市	95	嘉峪	嘉峪2018	嘉峪关市2018	7.81785	53.2633	21.4435			0	0	0	119.418	0.0645	78.073	6.56865	0.378137	2.93362	0	38	37.54	236.21	23	5441	0	0	0	0	0	0
620000	甘肃省	地级市	2019	嘉峪关市	95	嘉峪	嘉峪2019	嘉峪关市2019	7.81366	58.0331	22.5416			0	0	0	112.219	0.0645	80.651	6.88597	0.729075	3.24629	0	20	35.55	234.2	18	6116	0	0	0	0	0	0
620000	甘肃省	地级市	2020	嘉峪关市	95	嘉峪	嘉峪2020	嘉峪关市2020	10.6855	54.9335	25.2574			0	0	0	91	0.0645	87.807	6.44734	1.59553	3.31101	0	37	34.45	232.54	24	5580	0	0	0	0	0	0
440000	广东省	地级市	2006	江门市	96	江门	江门2006	江门市2006	15.7019	23.4167	19.2109			0	0	0	22.936	0.3773	16.6587	5.37815	0.76597	1.91631	0.60062	42	37.22	229.08	22	6065	0	0	0	1	0	0
440000	广东省	地级市	2007	江门市	96	江门	江门2007	江门市2007	14.1781	19.5681	16.6741			0	0	0	26.882	0.4178	19.3763	5.6392	2.45761	1.77987	0.742048	58	36.01	227.63	29	8129	0	0	0	1	0	0
440000	广东省	地级市	2008	江门市	96	江门	江门2008	江门市2008	16.1062	28.0067	21.3227			0	0	0	30.973	0.417	21.6744	5.83202	2.38667	1.73181	0.923204	107	34.34	226.27	21	5416	0	0	0	1	0	0
440000	广东省	地级市	2009	江门市	96	江门	江门2009	江门市2009	15.6366	21.3482	18.2902			0	0	0	32.139	0.4141	29.585	6.23711	2.02737	2.04457	1.16042	112	34.24	226.46	21	5190	0	0	0	1	0	0
440000	广东省	地级市	2010	江门市	96	江门	江门2010	江门市2010	16.0318	22.8342	19.1609			0	0	0	37.313	0.4485	37.4956	6.64076	2.24815	2.03049	1.4126	132	37.01	229.56	17	5422	0	0	0	1	0	0
440000	广东省	地级市	2011	江门市	96	江门	江门2011	江门市2011	18.0478	19.6297	18.8237			0	0	0	41.063	0.5487	31.9105	6.50992	2.33233	1.97997	1.7374	178	37.97	230.43	27	6741	0	0	0	1	0	0
440000	广东省	地级市	2012	江门市	96	江门	江门2012	江门市2012	19.8176	22.4259	21.0856			0	0	0	42.028	0.533	37.9853	7.18116	2.8768	2.1989	2.05968	171	40.95	233	10	4798	0	0	1	1	0	0
440000	广东省	地级市	2013	江门市	96	江门	江门2013	江门市2013	18.9178	22.3907	20.5884			0	0	0	50.895	0.595	42.849	7.90093	2.4824	2.38503	2.36932	180	41.41	233.47	21	6571	0	0	1	1	0	0
440000	广东省	地级市	2014	江门市	96	江门	江门2014	江门市2014	19.7509	23.9136	21.7432			0	0	0	46.237	0.59919	48.168	8.50801	2.18268	2.5642	2.60313	192	42.88	234.81	19	7453	0	0	1	1	0	0
440000	广东省	地级市	2015	江门市	96	江门	江门2015	江门市2015	21.0034	26.5438	23.6301			0	0	0	49.608	0.58285	54.106	8.8843	2.72623	2.67177	2.83398	223	43.79	236	11	4281	0	1	1	1	0	0
440000	广东省	地级市	2016	江门市	96	江门	江门2016	江门市2016	23.076	27.7739	25.3294			0	0	0	53.374	0.59536	61.366	8.44121	3.22763	2.57862	3.13535	298	44.61	236.8	12	6125	0	1	1	1	0	0
440000	广东省	地级市	2017	江门市	96	江门	江门2017	江门市2017	23.0042	24.9969	23.9822			0	0	0	59.089	0.56713	66.107	8.26588	3.30718	2.54833	3.52123	444			5	2953	0	1	1	1	0	0
440000	广东省	地级市	2018	江门市	96	江门	江门2018	江门市2018	16.9448	26.5382	21.2607			0	0	0	63.328	0.64324	71.371	8.41426	3.5148	2.58083	3.93559	656	44.5	237.55	16	6725	0	1	1	1	0	0
440000	广东省	地级市	2019	江门市	96	江门	江门2019	江门市2019	31.8697	29.4465	30.6377			0	0	0	68.194	0.59014	80.332	8.1611	3.6556	2.68474	4.42872	353	48.93	240.83	10	7039	0	1	1	1	0	0
440000	广东省	地级市	2020	江门市	96	江门	江门2020	江门市2020	21.5022	30.9883	25.8666			0	0	0	66.984	0.58634	88.219	8.24755	3.78251	3.03145	4.87862	507	49.77	241.15	7	7613	0	1	1	1	0	0
410000	河南省	地级市	2006	焦作市	97	焦作	焦作2006	焦作市2006	8.70784	4.68343	6.39591			0	0	0	19.772	0.3231	14.557	5.33418	0.196092	1.07187	0.30031	12	26.93	218.05	12	5958	0	0	0	1	0	1
410000	河南省	地级市	2007	焦作市	97	焦作	焦作2007	焦作市2007	6.87877	3.99525	5.24743			0	0	0	25.23	0.3248	18.5554	5.43523	1.67764	0.930918	0.371024	19	26.26	218.2	18	5983	0	0	0	1	0	1
410000	河南省	地级市	2008	焦作市	97	焦作	焦作2008	焦作市2008	7.63556	10.3587	8.89805			0	0	0	30.356	0.3226	20.6875	4.76742	1.82899	0.869296	0.461602	32	25.04	216.93	23	6166	0	0	0	1	0	1
410000	河南省	地级市	2009	焦作市	97	焦作	焦作2009	焦作市2009	8.29487	4.53859	6.14426			0	0	0	31.356	0.3367	24.4872	5.07955	2.2574	0.999785	0.580211	49	24.68	216.68	16	6511	0	0	0	1	0	1
410000	河南省	地级市	2010	焦作市	97	焦作	焦作2010	焦作市2010	9.61282	4.0736	6.27587			0	0	0	35.767	0.3229	26.3306	5.08364	2.31288	0.978826	0.7063	90	23.22	215.09	18	5753	0	0	0	1	0	1
410000	河南省	地级市	2011	焦作市	97	焦作	焦作2011	焦作市2011	11.2077	3.94662	6.68132			0	0	0	40.809	0.3777	30.3847	5.16487	2.2494	1.01316	0.8687	106	23.2	215.29	13	6160	0	0	0	1	0	1
410000	河南省	地级市	2012	焦作市	97	焦作	焦作2012	焦作市2012	13.7737	4.93991	8.29397			0	0	0	44.029	0.398	34.7519	5.4877	1.978	1.08604	1.02984	131	24.65	216.76	18	7309	0	0	0	1	0	1
410000	河南省	地级市	2013	焦作市	97	焦作	焦作2013	焦作市2013	13.7928	3.58923	7.09394			0	0	0	46.396	0.494	34.3159	5.70139	2.09314	1.12742	1.18466	148	24.79	217	21	5831	0	0	0	1	0	1
410000	河南省	地级市	2014	焦作市	97	焦作	焦作2014	焦作市2014	12.9232	3.28357	6.56568			0	0	0	52.421	0.49374	39.9165	5.72433	2.14589	1.14856	1.30156	149	30.78	223.36	23	6261	0	0	0	1	0	1
410000	河南省	地级市	2015	焦作市	97	焦作	焦作2015	焦作市2015	10.6125	4.1971	6.69815			0	0	0	54.59	0.50337	42.153	5.97638	1.54311	1.24011	1.41699	172	33.13	226.03	11	6013	0	0	0	1	0	1
410000	河南省	地级市	2016	焦作市	97	焦作	焦作2016	焦作市2016	9.6758	4.16246	6.3643			0	0	0	59.183	0.54246	46.41	5.92709	1.45652	1.29678	1.56767	249	34.33	227.94	33	7226	0	0	0	1	0	1
410000	河南省	地级市	2017	焦作市	97	焦作	焦作2017	焦作市2017	11.3674	5.15693	7.67938			0	0	0	64.173	0.54009	50.98	5.86758	1.4935	1.31645	1.76061	229			35	7449	0	0	0	1	0	1
410000	河南省	地级市	2018	焦作市	97	焦作	焦作2018	焦作市2018	11.9424	8.1712	9.88712			0	0	0	66.328	0.35482	59.234	6.13554	1.5781	1.34354	1.96779	383	37.73	232.04	44	7522	0	0	0	1	0	1
410000	河南省	地级市	2019	焦作市	97	焦作	焦作2019	焦作市2019	11.1873	9.59925	10.3645			0	0	0	76.827	0.38481	61.831	5.66711	1.61188	1.28561	2.21436	305	40.97	235.55	28	9313	0	0	0	1	0	1
410000	河南省	地级市	2020	焦作市	97	焦作	焦作2020	焦作市2020	10.8152	9.7504	10.2697			0	0	0	60.384	0.33659	64.602	7.46392	1.65788	1.90041	2.43931	281	50.56	243.12	39	8588	0	0	0	1	0	1
440000	广东省	地级市	2006	揭阳市	98	揭阳	揭阳2006	揭阳市2006	17.48	23.0481	20.0905			0	0	0	8.606	0.2042	13.1222	2.82671	0.355935	1.51033	0	10	34.79	219.55	12	5601	0	0	0	1	0	1
440000	广东省	地级市	2007	揭阳市	98	揭阳	揭阳2007	揭阳市2007	18.9913	18.7295	18.86			0	0	0	10.339	0.2046	15.0418	2.95677	0.886694	1.34037	0	13	32.2	219.03	14	5926	0	0	0	1	0	1
440000	广东省	地级市	2008	揭阳市	98	揭阳	揭阳2008	揭阳市2008	16.2869	27.9625	21.4216			0	0	0	12.679	0.2056	17.2547	3.08552	0.491362	1.31968	0	14	31.12	218.25	14	4033	0	0	0	1	0	1
440000	广东省	地级市	2009	揭阳市	98	揭阳	揭阳2009	揭阳市2009	13.8029	21.7033	17.3455			0	0	0	14.159	0.2089	19.8777	3.53705	0.572911	1.39608	0	10	33.62	221.81	8	3475	0	0	0	1	0	1
440000	广东省	地级市	2010	揭阳市	98	揭阳	揭阳2010	揭阳市2010	13.7225	23.31	17.9398			0	0	0	17.373	0.2071	22.6106	3.82864	0.504948	1.35084	0	11	31.66	220.68	9	3360	0	0	0	1	0	1
440000	广东省	地级市	2011	揭阳市	98	揭阳	揭阳2011	揭阳市2011	13.0385	20.5411	16.3992			0	0	0	20.78	0.2305	26.9292	3.78097	0.768022	1.3322	0	25	29.55	219.05	6	4859	0	0	0	1	0	1
440000	广东省	地级市	2012	揭阳市	98	揭阳	揭阳2012	揭阳市2012	12.9588	23.8421	17.6478			0	0	0	23.532	0.23	30.636	4.05894	1.10217	1.36534	0	22	28.44	218.4	23	6339	0	0	1	1	0	1
440000	广东省	地级市	2013	揭阳市	98	揭阳	揭阳2013	揭阳市2013	35.0322	19.3595	26.1867			0	0	0	23.504	0.391	41.9308	4.15449	0.40282	1.40003	0	71	27.23	217.61	17	3753	0	0	1	1	0	1
440000	广东省	地级市	2014	揭阳市	98	揭阳	揭阳2014	揭阳市2014	31.1666	21.5923	25.9959			0	0	0	29.6	0.40998	43.6213	4.13874	0.311663	1.44254	0	29	29.5	220.66	39	4110	0	0	1	1	0	1
440000	广东省	地级市	2015	揭阳市	98	揭阳	揭阳2015	揭阳市2015	9.83881	29.2603	17.1822			0	0	0	31.255	0.41821	44.878	4.09544	0.523044	1.4594	0	38	31.52	222.63	24	4395	0	0	1	1	0	1
440000	广东省	地级市	2016	揭阳市	98	揭阳	揭阳2016	揭阳市2016	37.4819	24.4663	30.3824			0	0	0	33.027	0.41336	48.156	3.66952	1.26387	1.49966	0	39	34.88	225.49	22	5360	0	0	1	1	0	1
440000	广东省	地级市	2017	揭阳市	98	揭阳	揭阳2017	揭阳市2017	7.30193	28.6883	14.7256			0	0	0	32.642	0.37861	50.598	3.66281	0.668063	1.5875	0	62			58	6437	0	0	1	1	0	1
440000	广东省	地级市	2018	揭阳市	98	揭阳	揭阳2018	揭阳市2018	8.36888	28.6039	15.7018			0	0	0	35.358	0.30444	54.855	3.68597	1.21022	1.583	0	129	40.19	232.55	21	6156	0	0	1	1	0	1
440000	广东省	地级市	2019	揭阳市	98	揭阳	揭阳2019	揭阳市2019	9.62871	35.6063	18.8898			0	0	0	34.471	0.23186	65.614	3.47365	0.872023	1.71093	0	76	52.15	243.25	29	7222	0	0	1	1	0	1
440000	广东省	地级市	2020	揭阳市	98	揭阳	揭阳2020	揭阳市2020	9.97482	34.1922	18.7959			0	0	0	37.495	0.26076	69.943	3.5192	0.835985	1.81955	0	164	53.43	243.74	23	7743	0	0	1	1	0	1
620000	甘肃省	地级市	2006	金昌市	99	金昌	金昌2006	金昌市2006	0.71116	30.1942	3.17597			0	0	0	32.785	0.0785	24.3009	4.02408	0.12829	1.3296	0	2	18.23	209.05	10	6595	0	0	0	0	0	1
620000	甘肃省	地级市	2007	金昌市	99	金昌	金昌2007	金昌市2007	0.71116	31.6152	4.37302			0	0	0	45.574	0.0751	29.7743	3.95129	0.485671	1.06059	0	9	18.23	207.15	25	6407	0	0	0	0	0	1
620000	甘肃省	地级市	2008	金昌市	99	金昌	金昌2008	金昌市2008	0.71116	31.4918	4.33353			0	0	0	41.231	0.0748	35.444	3.14361	0.906239	1.2844	0	8	18.23	209.08	19	5871	0	0	0	0	0	1
620000	甘肃省	地级市	2009	金昌市	99	金昌	金昌2009	金昌市2009	0.71116	39.8869	4.02572			0	0	0	41.06	0.0739	37.2639	4.74086	0.568097	1.65635	0	2	18.23	209.54	20	5577	0	0	0	0	0	1
620000	甘肃省	地级市	2010	金昌市	99	金昌	金昌2010	金昌市2010	0.71116	38.52	4.2011			0	0	0	43.4	0.0744	40.3009	4.85494	1.04306	1.48623	0	12	18.23	210.09	15	5589	0	0	0	0	0	1
620000	甘肃省	地级市	2011	金昌市	99	金昌	金昌2011	金昌市2011	0.71116	31.7688	3.78168			0	0	0	50.06	0.0807	43.2137	4.89034	0.517165	1.52054	0	22	18.23	211.34	17	6620	0	0	0	0	0	1
620000	甘肃省	地级市	2012	金昌市	99	金昌	金昌2012	金昌市2012	2.13218	31.8232	8.605			0	0	0	52.157	0.102	53.4914	5.47331	0.568798	1.47423	0	23	18.7	213.2	21	7497	0	0	1	0	0	1
620000	甘肃省	地级市	2013	金昌市	99	金昌	金昌2013	金昌市2013	2.5482	37.4498	10.2808			0	0	0	53.625	0.118	49.3863	6.29653	0.593944	1.76027	0	33	21.07	214.82	23	6567	0	0	1	0	0	1
620000	甘肃省	地级市	2014	金昌市	99	金昌	金昌2014	金昌市2014	3.24313	36.979	11.4617			0	0	0	54.565	0.11289	52.3327	7.02519	0.644656	2.03675	0	47	27.13	220.43	0	1980	0	0	1	0	0	1
620000	甘肃省	地级市	2015	金昌市	99	金昌	金昌2015	金昌市2015	3.40414	37.9572	11.9059			0	0	0	47.739	0.11076	52.683	8.22849	0.389279	2.93513	0	37	33.78	225.77	2	3039	0	0	1	0	0	1
620000	甘肃省	地级市	2016	金昌市	99	金昌	金昌2016	金昌市2016	6.94975	35.9746	16.2563			0	0	0	44.202	0.10217	53.996	9.98382	0.256694	3.29179	0	45	39.92	229.95	43	7764	0	0	1	0	0	1
620000	甘肃省	地级市	2017	金昌市	99	金昌	金昌2017	金昌市2017	7.63644	44.4093	19.1143			0	0	0	47.177	0.09856	61.136	10.0307	0.301857	3.03814	0	51			38	6546	0	0	1	0	0	1
620000	甘肃省	地级市	2018	金昌市	99	金昌	金昌2018	金昌市2018	8.28054	45.2054	20.0594			0	0	0	56.353	0.09782	69.519	8.73424	0.427166	2.68569	0	93	38.31	231.1	28	6347	0	0	1	0	0	1
620000	甘肃省	地级市	2019	金昌市	99	金昌	金昌2019	金昌市2019	9.08438	50.2424	22.2458			0	0	0	73.39	0.09151	79.103	6.12577	0.47717	2.12355	0	42	28.33	221.43	41	7525	0	0	1	0	0	1
620000	甘肃省	地级市	2020	金昌市	99	金昌	金昌2020	金昌市2020	11.6367	47.0568	24.084			0	0	0	81.643	0.09134	86.195	6.27542	1.15004	2.12355	0	67	28.47	220.36	29	7029	0	0	1	0	0	1
330000	浙江省	地级市	2006	金华市	100	金华	金华2006	金华市2006	12.9044	15.0881	13.9565	2018	-12	1	0	0	27.108	0.4704	25.0409	6.59646	0.597706	2.51154	1.20124	56	40.58	235.1	0	0	0	0	0	1	0	1
330000	浙江省	地级市	2007	金华市	100	金华	金华2007	金华市2007	14.1492	13.6136	13.879	2018	-11	1	0	0	32.002	0.4029	28.8528	6.95712	3.74893	2.518	1.4841	102	40.53	235.27	29	5618	0	0	0	1	0	1
330000	浙江省	地级市	2008	金华市	100	金华	金华2008	金华市2008	14.3544	16.6518	15.4637	2018	-10	1	0	0	36.538	0.4045	31.5805	7.11746	3.95189	2.64412	1.84641	129	40.98	235.65	33	6529	0	0	0	1	0	1
330000	浙江省	地级市	2009	金华市	100	金华	金华2009	金华市2009	12.269	14.9816	13.5621	2018	-9	1	0	0	34.294	0.4812	34.7687	7.27876	3.76107	3.2269	2.32084	225	43.04	237.89	20	6244	0	0	0	1	0	1
330000	浙江省	地级市	2010	金华市	100	金华	金华2010	金华市2010	11.6371	16.4549	13.852	2018	-8	1	0	0	39.897	0.525	39.469	7.38968	3.57062	3.35702	2.8252	300	43.41	238.29	22	6421	0	0	0	1	0	1
330000	浙江省	地级市	2011	金华市	100	金华	金华2011	金华市2011	11.6267	14.3484	12.9206	2018	-7	1	0	0	45.721	0.577	42.8639	7.55749	3.54981	3.42772	3.4748	338	44.2	239.08	28	8098	0	0	0	1	0	1
330000	浙江省	地级市	2012	金华市	100	金华	金华2012	金华市2012	14.4099	17.3054	15.7965	2018	-6	1	0	0	50.269	0.884	47.1986	7.92723	3.83177	3.5064	4.11936	465	45.43	240.47	21	4390	0	0	0	1	0	1
330000	浙江省	地级市	2013	金华市	100	金华	金华2013	金华市2013	17.1378	15.4584	16.2782	2018	5	1	0	0	62.553	0.901	55.2294	8.19501	3.76616	3.76443	4.73864	530	46.4	241.66	24	6227	0	0	0	1	0	1
330000	浙江省	地级市	2014	金华市	100	金华	金华2014	金华市2014	16.2413	16.4047	16.3228	2018	4	1	0	0	59.056	0.96	55.806	8.38062	3.7929	3.80149	5.20625	490	48.67	244.37	18	5487	0	0	0	1	0	1
330000	浙江省	地级市	2015	金华市	100	金华	金华2015	金华市2015	20.8772	22.0674	21.4649	2018	3	1	0	0	62.48	0.94428	66.782	9.10222	3.46527	3.77104	5.66795	605	50.32	246.17	19	6041	0	0	0	1	0	1
330000	浙江省	地级市	2016	金华市	100	金华	金华2016	金华市2016	24.9142	23.9445	24.4251	2018	6	1	0	0	67.158	0.92662	72.962	9.17626	3.35871	3.70311	6.2707	748	51.38	247.37	23	7035	0	0	0	1	0	1
330000	浙江省	地级市	2017	金华市	100	金华	金华2017	金华市2017	6.71166	24.9458	13.1243	2018	-1	1	0	0	69.445	0.76491	82.199	9.29443	3.47429	3.74892	7.04245	814			20	6686	0	0	1	1	0	1
330000	浙江省	地级市	2018	金华市	100	金华	金华2018	金华市2018	7.81591	27.7562	14.9511	2018	0	1	1	1	73.428	0.86975	88.664	9.57559	3.68306	3.87261	7.87117	1241	54.12	250.81	15	5958	0	0	1	1	0	1
330000	浙江省	地级市	2019	金华市	100	金华	金华2019	金华市2019	7.42581	32.569	15.8941	2018	1	1	1	1	81.224	0.69533	90.635	9.01976	3.73208	3.97144	8.85744	1103	56.6	253.4	19	6375	0	0	1	1	0	1
330000	浙江省	地级市	2020	金华市	100	金华	金华2020	金华市2020	7.45065	34.6127	16.4549	2018	2	1	1	1	67.329	0.70832	96.589	8.9977	2.90651	4.45144	9.75724	1570	58.1	254.76	10	6403	0	0	1	1	0	1
210000	辽宁省	地级市	2006	锦州市	101	锦州	锦州2006	锦州市2006	9.35391	1.13771	3.29465			0	0	0	14.906	0.2478	15.2825	4.48064	0.388596	1.96563	1.50155	23	39.82	219.3	6	6355	0	0	0	1	0	0
210000	辽宁省	地级市	2007	锦州市	101	锦州	锦州2007	锦州市2007	7.8342	0.91886	2.70579			0	0	0	17.817	0.2572	18.0526	4.71272	0.878509	1.75541	1.85512	26	37.83	219.03	11	5946	0	0	0	1	0	0
210000	辽宁省	地级市	2008	锦州市	101	锦州	锦州2008	锦州市2008	7.91011	1.00172	2.83805			0	0	0	22.287	0.2583	20.4352	5.07897	1.08668	1.64322	2.30801	27	38.16	220.19	5	5820	0	0	0	1	0	0
210000	辽宁省	地级市	2009	锦州市	101	锦州	锦州2009	锦州市2009	9.30166	0.66795	2.52385			0	0	0	23.447	0.2393	25.8955	6.60101	0.946139	1.83819	2.90105	30	35.58	217.29	14	5099	0	0	0	1	0	0
210000	辽宁省	地级市	2010	锦州市	101	锦州	锦州2010	锦州市2010	7.66105	2.58911	4.46857			0	0	0	29.264	0.2413	29.4531	8.88313	0.889666	1.74735	3.5315	35	35.8	219.22	4	4193	0	0	0	1	0	0
210000	辽宁省	地级市	2011	锦州市	101	锦州	锦州2011	锦州市2011	7.42269	2.77196	4.54867			0	0	0	35.784	0.2686	33.4989	9.28155	0.848157	1.63037	4.3435	33	34.88	219.36	9	5134	0	0	0	1	0	0
210000	辽宁省	地级市	2012	锦州市	101	锦州	锦州2012	锦州市2012	7.88204	3.09905	4.95582			0	0	0	40.002	0.292	37.7091	10.582	1.19626	1.70405	5.14921	42	35.1	219.79	8	4739	0	0	1	1	0	0
210000	辽宁省	地级市	2013	锦州市	101	锦州	锦州2013	锦州市2013	7.93649	4.63629	6.07259			0	0	0	43.952	0.321	39.7518	10.1188	1.14432	1.84497	5.9233	66	36.14	221.11	7	5676	0	0	1	1	0	0
210000	辽宁省	地级市	2014	锦州市	101	锦州	锦州2014	锦州市2014	7.92792	5.65207	6.69714			0	0	0	44.264	0.32803	41.4476	10.0327	1.12719	2.07898	6.50781	46	38.82	224.04	14	4724	0	0	1	1	0	0
210000	辽宁省	地级市	2015	锦州市	101	锦州	锦州2015	锦州市2015	8.27053	6.10629	7.10937			0	0	0	43.207	0.31701	47.416	5.68953	0.421225	2.52035	7.08494	55	41.23	225.31	15	5175	0	0	1	1	0	0
210000	辽宁省	地级市	2016	锦州市	101	锦州	锦州2016	锦州市2016	6.16609	6.60772	6.38321			0	0	0	33.692	0.29269	49.162	8.21172	0.424839	3.8676	7.83838	124	45.89	225.98	14	5616	0	0	1	1	0	0
210000	辽宁省	地级市	2017	锦州市	101	锦州	锦州2017	锦州市2017	9.55704	11.9016	10.6684			0	0	0	35.254	0.24139	54.892	8.47074	1.00597	4.53948	8.80307	113			9	5402	0	0	1	1	0	0
210000	辽宁省	地级市	2018	锦州市	101	锦州	锦州2018	锦州市2018	9.73854	14.3906	11.8514			0	0	0	39.211	0.22571	60.583	8.41504	0.529258	5.69432	9.83896	174	49.93	234.82	14	6348	0	0	1	1	0	0
210000	辽宁省	地级市	2019	锦州市	101	锦州	锦州2019	锦州市2019	1.8426	30.5922	7.84234			0	0	0	35.431	0.22297	65.771	9.50846	1.3681	6.44195	11.0718	123	55.5	237.02	13	5050	0	0	1	1	0	0
210000	辽宁省	地级市	2020	锦州市	101	锦州	锦州2020	锦州市2020	8.74747	13.0397	10.6913			0	0	0	39.332	0.22704	71.4	9.71422	0.314984	6.44195	12.1966	118	55.5	236.08	12	4975	0	0	1	1	0	0
140000	山西省	地级市	2006	晋城市	102	晋城	晋城2006	晋城市2006	30.0789	0.77918	5.10665			0	0	0	16.489	0.2413	21.2706	7.27	0.323197	2.42536	0	2	30.95	226.52	26	8741	0	0	0	1	0	1
140000	山西省	地级市	2007	晋城市	102	晋城	晋城2007	晋城市2007	20.7925	1.56718	5.86653			0	0	0	18.773	0.2475	26.4015	8.11473	1.31639	2.51317	0	3	31.62	226.81	47	9278	0	0	0	1	0	1
140000	山西省	地级市	2008	晋城市	102	晋城	晋城2008	晋城市2008	17.5996	0.6779	3.55402			0	0	0	23.68	0.2578	30.9962	7.93558	1.42433	2.53014	0	9	32.23	227.97	32	7308	0	0	0	1	0	1
140000	山西省	地级市	2009	晋城市	102	晋城	晋城2009	晋城市2009	23.0746	0.56631	3.76737			0	0	0	27.108	0.2682	34.1971	7.93238	1.33757	2.53147	0	9	32.54	228.41	26	7251	0	0	0	1	0	1
140000	山西省	地级市	2010	晋城市	102	晋城	晋城2010	晋城市2010	42.8754	0.76811	6.22688			0	0	0	32.337	0.2715	40.0316	7.59558	1.42648	2.52942	0	26	32.19	227.97	32	6672	0	0	0	1	0	1
140000	山西省	地级市	2011	晋城市	102	晋城	晋城2011	晋城市2011	43.053	0.60912	5.57532			0	0	0	39.205	0.2888	48.7055	7.58927	1.3311	2.38195	0	37	30.21	225.89	33	6135	0	0	0	1	0	1
140000	山西省	地级市	2012	晋城市	102	晋城	晋城2012	晋城市2012	31.753	0.9305	5.74274			0	0	0	44.257	0.289	54.4705	8.18567	1.47775	2.47481	0	35	31.23	227.01	25	6732	0	0	1	1	0	1
140000	山西省	地级市	2013	晋城市	102	晋城	晋城2013	晋城市2013	26.8285	0.92024	5.19632			0	0	0	47.119	0.379	54.8818	9.16505	1.37417	2.52595	0	43	33.35	229.15	26	5063	0	0	1	1	0	1
140000	山西省	地级市	2014	晋城市	102	晋城	晋城2014	晋城市2014	19.5814	0.94175	4.42463			0	0	0	44.943	0.37702	55.7498	9.46405	1.22247	2.63056	0	52	37.02	232.8	25	5155	0	0	1	1	0	1
140000	山西省	地级市	2015	晋城市	102	晋城	晋城2015	晋城市2015	20.1751	1.16325	4.98775			0	0	0	44.994	0.373	54.721	9.027	1.24521	2.66479	0	54	39.87	235.14	20	5565	0	0	1	1	0	1
140000	山西省	地级市	2016	晋城市	102	晋城	晋城2016	晋城市2016	18.7116	1.61939	5.6342			0	0	0	45.271	0.3557	55.453	8.51229	0.562525	2.87492	0	33	42.37	237.62	32	6980	0	0	1	1	0	1
140000	山西省	地级市	2017	晋城市	102	晋城	晋城2017	晋城市2017	5.89995	7.17875	6.50903			0	0	0	49.487	0.3567	62.656	8.80264	0.745857	2.8386	0	59			16	7199	0	0	1	1	0	1
140000	山西省	地级市	2018	晋城市	102	晋城	晋城2018	晋城市2018	6.19947	8.90455	7.43439			0	0	0	57.819	0.35328	67.052	9.26897	0.659069	2.7203	0	80	43.26	239.62	16	7184	0	0	1	1	0	1
140000	山西省	地级市	2019	晋城市	102	晋城	晋城2019	晋城市2019	5.57718	9.9658	7.46693			0	0	0	57.714	0.37038	68.461	10.2002	1.12542	3.06099	0	52	42.18	238.69	22	6982	0	0	1	1	0	1
140000	山西省	地级市	2020	晋城市	102	晋城	晋城2020	晋城市2020	5.53073	10.1994	7.52382			0	0	0	64.966	0.3564	73.443	10.1862	1.22348	3.12492	0	81	42.5	238.52	20	5614	0	0	1	1	0	1
140000	山西省	地级市	2006	晋中市	103	晋中	晋中2006	晋中市2006	8.05083	0.35429	1.71026			0	0	0	12.491	0.2967	14.53	6.19509	0.118459	2.06012	1.80186	5	36.43	227.23	9	7530	0	0	0	1	0	1
140000	山西省	地级市	2007	晋中市	103	晋中	晋中2007	晋中市2007	9.6972	1.0585	3.23877			0	0	0	15.157	0.3199	17.4447	8.72299	0.81352	1.98811	2.22614	11	36.38	227.72	14	5943	0	0	0	1	0	1
140000	山西省	地级市	2008	晋中市	103	晋中	晋中2008	晋中市2008	7.43514	0.62046	2.16811			0	0	0	18.219	0.3225	22.301	8.26174	0.883409	2.05534	2.76961	14	34.52	227	32	6960	0	0	0	1	0	1
140000	山西省	地级市	2009	晋中市	103	晋中	晋中2009	晋中市2009	8.62882	0.42084	1.93076			0	0	0	20.335	0.36	23.7066	9.0697	0.824059	2.24032	3.48127	15	38.93	230.08	34	6040	0	0	0	1	0	1
140000	山西省	地级市	2010	晋中市	103	晋中	晋中2010	晋中市2010	9.43321	0.68873	2.58113			0	0	0	24.275	0.3506	29.0275	8.47718	0.839477	2.24552	4.2378	28	36.74	228.24	44	6942	0	0	0	1	0	1
140000	山西省	地级市	2011	晋中市	103	晋中	晋中2011	晋中市2011	9.48009	0.58326	2.38319			0	0	0	27.3	0.3494	37.7205	8.76569	0.77426	2.31444	5.2122	22	36.88	228.58	36	6999	0	0	0	1	0	1
140000	山西省	地级市	2012	晋中市	103	晋中	晋中2012	晋中市2012	13.4078	1.22364	4.11704			0	0	0	30.093	0.346	42.6831	10.0581	0.786518	2.46858	6.17905	31	36.93	228.44	13	4110	0	0	0	1	0	1
140000	山西省	地级市	2013	晋中市	103	晋中	晋中2013	晋中市2013	12.4846	1.2683	4.03716			0	0	0	30.977	0.367	46.3718	11.2627	0.80919	2.68353	7.10796	39	38.15	228.72	34	5459	0	0	0	1	0	1
140000	山西省	地级市	2014	晋中市	103	晋中	晋中2014	晋中市2014	12.8453	1.43213	4.35046			0	0	0	31.434	0.35235	47.2469	11.2855	0.88428	2.82129	7.80938	50	42.63	232.71	31	5338	0	0	0	1	0	1
140000	山西省	地级市	2015	晋中市	103	晋中	晋中2015	晋中市2015	9.44724	2.94509	5.29892			0	0	0	31.434	0.35641	51.189	9.5824	0.789336	3.10678	8.50193	45	46.09	235.97	33	6037	0	0	0	1	0	1
140000	山西省	地级市	2016	晋中市	103	晋中	晋中2016	晋中市2016	5.78378	4.96961	5.36167			0	0	0	32.646	0.35049	53.196	9.23839	0.612291	3.42888	9.40605	57	47.12	237.19	34	7563	0	0	0	1	0	1
140000	山西省	地级市	2017	晋中市	103	晋中	晋中2017	晋中市2017	5.13966	6.78316	5.90617			0	0	0	38.274	0.35176	61.554	9.18812	0.880852	3.22736	10.5637	93			23	7351	0	0	0	1	0	1
140000	山西省	地级市	2018	晋中市	103	晋中	晋中2018	晋中市2018	5.31374	8.3544	6.66846			0	0	0	42.91	0.34947	67.38	10.418	0.708878	3.21664	11.8068	131	44.6	236.73	28	5687	0	0	0	1	0	1
140000	山西省	地级市	2019	晋中市	103	晋中	晋中2019	晋中市2019	5.03279	9.44199	6.90518			0	0	0	43.125	0.37655	69.202	11.1649	0.735248	3.43353	13.2862	103	47.28	239.36	30	6808	0	0	0	1	0	1
140000	山西省	地级市	2020	晋中市	103	晋中	晋中2020	晋中市2020	3.75413	9.8797	6.1121			0	0	0	43.546	0.3616	74.469	11.4848	0.686574	3.70558	14.6359	135	46.97	239.41	26	7055	0	0	0	1	0	1
420000	湖北省	地级市	2006	荆门市	104	荆门	荆门2006	荆门市2006	19.6087	75.9381	40.2987			0	0	0	11.903	0.2229	13.1222	2.91756	0.118459	1.37407	0	10	38.74	214.07	10	5546	0	0	0	1	0	1
420000	湖北省	地级市	2007	荆门市	104	荆门	荆门2007	荆门市2007	41.4671	67.6641	53.3575			0	0	0	14.157	0.2457	17.2021	2.87179	0.88431	1.30063	0	11	37.31	212.7	19	7297	0	0	0	1	0	1
420000	湖北省	地级市	2008	荆门市	104	荆门	荆门2008	荆门市2008	61.8941	84.771	72.7218			0	0	0	18.309	0.2685	20.3274	2.87295	1.04077	1.21432	0	16	35.43	210.62	15	6660	0	0	0	1	0	1
420000	湖北省	地级市	2009	荆门市	104	荆门	荆门2009	荆门市2009	71.6988	68.1212	69.8942			0	0	0	21.074	0.2862	23.4265	3.02246	0.804812	1.3197	0	11	33.38	210.96	7	2297	0	0	0	1	0	1
420000	湖北省	地级市	2010	荆门市	104	荆门	荆门2010	荆门市2010	67.636	62.6787	65.1239			0	0	0	25.509	0.3144	28.0554	3.18432	0.753312	1.37303	0	21	31.76	211.89	35	7508	0	0	0	1	0	1
420000	湖北省	地级市	2011	荆门市	104	荆门	荆门2011	荆门市2011	50.1856	57.4846	53.7416			0	0	0	32.765	0.3751	26.0151	4.17854	0.774768	1.22081	0	24	29.88	212.21	24	6736	0	0	0	1	0	1
420000	湖北省	地级市	2012	荆门市	104	荆门	荆门2012	荆门市2012	64.9164	64.9318	64.9241			0	0	0	37.649	0.365	29.1746	4.67034	1.03483	1.31803	0	26	29.4	212.95	25	6117	0	0	1	1	0	1
420000	湖北省	地级市	2013	荆门市	104	荆门	荆门2013	荆门市2013	53.7799	52.7587	53.2674			0	0	0	39.954	0.381	31.0194	4.97589	1.34817	1.39835	0	63	29.97	214.15	18	5289	0	0	1	1	0	1
420000	湖北省	地级市	2014	荆门市	104	荆门	荆门2014	荆门市2014	54.6268	60.4165	57.4677			0	0	0	45.378	0.38296	35.9676	5.32758	1.57881	1.45756	0	61	30.98	215.88	17	5533	0	0	1	1	0	1
420000	湖北省	地级市	2015	荆门市	104	荆门	荆门2015	荆门市2015	47.4931	61.1474	53.9954			0	0	0	48	0.38692	39.516	5.79253	2.12761	1.60211	0	53	32.98	218.51	18	5826	0	0	1	1	0	1
420000	湖北省	地级市	2016	荆门市	104	荆门	荆门2016	荆门市2016	42.5451	66.2788	53.4206			0	0	0	52.47	0.39484	43.245	6.03083	2.3565	1.66495	0	99	34.08	220.07	36	8264	0	0	1	1	0	1
420000	湖北省	地级市	2017	荆门市	104	荆门	荆门2017	荆门市2017	25.9716	77.3155	46.2595			0	0	0	58.106	0.3969	48.129	6.08413	2.35866	1.72688	0	145			53	7994	0	0	1	1	0	1
420000	湖北省	地级市	2018	荆门市	104	荆门	荆门2018	荆门市2018	21.9653	70.4753	40.6384			0	0	0	63.742	0.40707	52.376	5.72317	2.66799	1.68905	0	218	36.68	224.44	21	6627	0	0	1	1	0	1
420000	湖北省	地级市	2019	荆门市	104	荆门	荆门2019	荆门市2019	27.2516	57.1458	39.9719			0	0	0	70.203	0.4135	55.899	5.4315	2.9006	1.67893	0	168	40.78	228.82	23	6054	0	0	1	1	0	1
420000	湖北省	地级市	2020	荆门市	104	荆门	荆门2020	荆门市2020	27.169	73.5082	45.8796			0	0	0	70.162	0.22817	83.218	4.18885	3.02756	2.03402	0	216	42.29	229.12	22	6551	0	0	1	1	0	1
420000	湖北省	地级市	2006	荆州市	105	荆州	荆州2006	荆州市2006	29.0008	71.0511	46.38			0	0	0	6.802	0.3635	13.1222	2.93551	0.241954	1.78241	0	16	38.71	209.78	11	7902	0	0	0	1	0	0
420000	湖北省	地级市	2007	荆州市	105	荆州	荆州2007	荆州市2007	23.1641	77.0818	43.8415			0	0	0	8.001	0.3689	14.4516	2.93336	0.244527	1.70604	0	16	36.81	207.12	11	5166	0	0	0	1	0	0
420000	湖北省	地级市	2008	荆州市	105	荆州	荆州2008	荆州市2008	50.1093	91.6762	68.7233			0	0	0	9.554	0.3669	16.2394	2.99782	0.696891	1.65907	0	36	36.05	205.92	15	5122	0	0	0	1	0	0
420000	湖北省	地级市	2009	荆州市	105	荆州	荆州2009	荆州市2009	69.0876	69.4197	69.2535			0	0	0	10.962	0.3868	18.8977	3.15072	0.62187	1.76567	0	42	34.99	205.79	10	6321	0	0	0	1	0	0
420000	湖北省	地级市	2010	荆州市	105	荆州	荆州2010	荆州市2010	60.2657	66.1787	63.1726			0	0	0	14.707	0.4272	24.567	3.29748	0.554261	1.78857	0	42	33.53	205.91	15	6771	0	0	0	1	0	0
420000	湖北省	地级市	2011	荆州市	105	荆州	荆州2011	荆州市2011	55.379	55.2471	55.313			0	0	0	18.288	0.3442	25.0522	4.24949	0.899728	1.6956	0	43	31.55	206.13	22	7505	0	0	0	1	0	0
420000	湖北省	地级市	2012	荆州市	105	荆州	荆州2012	荆州市2012	47.9823	73.3777	59.6974			0	0	0	20.912	0.367	31.1775	4.74601	0.997998	1.7603	0	43	31.83	207.35	14	5305	0	0	0	1	0	0
420000	湖北省	地级市	2013	荆州市	105	荆州	荆州2013	荆州市2013	58.2715	50.9416	54.5139			0	0	0	20.196	0.416	36.0273	5.38998	1.19281	1.90354	0	63	31.44	207.54	16	5768	0	0	0	1	0	0
420000	湖北省	地级市	2014	荆州市	105	荆州	荆州2014	荆州市2014	65.2685	55.7306	60.3625			0	0	0	25.774	0.4327	41.7422	5.95535	1.40383	1.97335	0	42	32.01	208.57	23	6101	0	0	0	1	0	0
420000	湖北省	地级市	2015	荆州市	105	荆州	荆州2015	荆州市2015	87.5734	44.771	63.6242			0	0	0	27.875	0.4278	39.565	6.53567	2.04514	2.07777	0	77	34.1	211.89	21	5498	0	0	0	1	0	0
420000	湖北省	地级市	2016	荆州市	105	荆州	荆州2016	荆州市2016	81.5185	49.2703	63.9514			0	0	0	30.305	0.42412	43.111	6.68591	2.2701	2.15969	0	137	35.19	213.03	18	5850	0	0	0	1	0	0
420000	湖北省	地级市	2017	荆州市	105	荆州	荆州2017	荆州市2017	33.4547	73.356	50.4286			0	0	0	33.776	0.40973	56.499	6.37278	2.37708	2.23014	0	139			24	5485	0	0	0	1	0	0
420000	湖北省	地级市	2018	荆州市	105	荆州	荆州2018	荆州市2018	30.3417	66.3265	45.5897			0	0	0	37.247	0.37709	63.569	6.45068	2.27179	2.2805	0	195	36.93	217.49	16	5233	0	0	0	1	0	0
420000	湖北省	地级市	2019	荆州市	105	荆州	荆州2019	荆州市2019	27.0944	57.2143	39.889			0	0	0	45.097	0.37737	67.213	5.54151	1.9524	2.10568	0	130	45.63	228.38	15	5316	0	0	0	1	0	0
420000	湖北省	地级市	2020	荆州市	105	荆州	荆州2020	荆州市2020	18.0167	80.0052	40.005			0	0	0	44.143	0.37447	61.734	4.4497	1.67649	2.48765	0	253	46.86	227.74	13	5235	0	0	0	1	0	0
360000	江西省	地级市	2006	景德镇市	106	景德	景德2006	景德镇市2006	159.975	5.44788	38.5523	2010	4	1	0	0	14.582	0.1581	13.1222	4.31835	0.199914	1.51016	0	4	36.64	227.37	10	3800	0	0	0	1	0	1
360000	江西省	地级市	2007	景德镇市	106	景德	景德2007	景德镇市2007	136.206	5.0927	32.8967	2010	3	1	0	0	16.899	0.1644	16.3429	4.54326	0.879167	1.33715	0	3	34.54	225.26	19	7489	0	0	0	1	0	1
360000	江西省	地级市	2008	景德镇市	106	景德	景德2008	景德镇市2008	140.337	9.67549	44.3635	2010	6	1	0	0	20.646	0.1695	18.6456	5.75022	0.810323	1.20152	0	6	32.1	222.64	14	6920	0	0	0	1	0	1
360000	江西省	地级市	2009	景德镇市	106	景德	景德2009	景德镇市2009	173.83	3.30767	33.4359	2010	-1	1	0	0	23.174	0.1706	20.5272	6.68422	0.745551	1.36844	0	3	32.53	223.29	16	6069	0	0	0	1	0	1
360000	江西省	地级市	2010	景德镇市	106	景德	景德2010	景德镇市2010	101.701	7.57384	31.6739	2010	0	1	1	1	29.155	0.1744	23.2472	8.39798	0.755328	1.3606	0	11	30.97	222.72	12	2302	0	0	0	1	0	1
360000	江西省	地级市	2011	景德镇市	106	景德	景德2011	景德镇市2011	126.236	3.48516	26.2187	2010	1	1	1	1	35.421	0.1925	29.0468	9.04743	0.784141	1.35705	0	17	29.08	221.16	30	5915	0	0	0	1	0	1
360000	江西省	地级市	2012	景德镇市	106	景德	景德2012	景德镇市2012	131.033	4.83514	31.2054	2010	2	1	1	1	39.151	0.193	34.0344	10.6071	0.789504	1.41638	0	8	32.71	224.91	15	4142	0	0	1	1	0	1
360000	江西省	地级市	2013	景德镇市	106	景德	景德2013	景德镇市2013	87.2661	7.01672	27.6294	2010	-3	1	1	1	40.981	0.202	37.3235	10.844	0.843292	1.51502	0	20	34.03	226.34	23	3912	0	0	1	1	0	1
360000	江西省	地级市	2014	景德镇市	106	景德	景德2014	景德镇市2014	117.81	5.99643	31.681	2010	-4	1	1	1	45.438	0.20073	41.1242	11.1287	0.761587	1.5822	0	9	34.42	226.94	11	4253	0	0	1	1	0	1
360000	江西省	地级市	2015	景德镇市	106	景德	景德2015	景德镇市2015	116.554	7.50457	34.6981	2010	-5	1	1	1	47.216	0.19507	45.814	11.7334	1.50733	1.69677	0	13	35.91	228.5	14	4687	0	0	1	1	0	1
360000	江西省	地级市	2016	景德镇市	106	景德	景德2016	景德镇市2016	115.136	8.08036	35.5296	2010	-2	1	1	1	50.989	0.19241	49.909	10.5602	1.07478	1.803	0	42	37.1	229.73	32	4326	0	0	1	1	0	1
360000	江西省	地级市	2018	景德镇市	106	景德	景德2018	景德镇市2018	46.4569	11.7287	24.0015	2010	8	1	1	1	50.723	0.16513	63.686	10.6137	1.30689	2.31333	0	63	45.81	239.14	19	4920	0	0	1	1	0	1
360000	江西省	地级市	2019	景德镇市	106	景德	景德2019	景德镇市2019	47.0829	14.4972	26.7188	2010	9	1	1	1	55.228	0.1416	71.069	10.7659	1.96653	2.41275	0	42	49.16	242.56	22	6182	0	1	1	1	0	1
360000	江西省	地级市	2020	景德镇市	106	景德	景德2020	景德镇市2020	48.221	13.6997	26.3616	2010	10	1	1	1	59.134	0.14524	72.319	10.4541	2.18169	2.7142	0	69	49.74	242.65	12	6171	0	1	1	1	0	1
360000	江西省	地级市	2017	景德镇市	106	景德	景德2017	景德镇市2017	66.7354	10.8024	28.4454	2010	7	1	1	1	50.856	0.18974	57.851	10.2806	2.06144	2.09134	0	52			9	4090	0	0	1	1	0	1
360000	江西省	地级市	2006	九江市	107	九江	九江2006	九江市2006	15.0069	21.3994	17.9449			0	0	0	10.783	0.364	13.5915	5.14355	0.250188	1.37123	1.20124	10	32.63	217.19	6	6309	0	0	0	1	0	1
360000	江西省	地级市	2007	九江市	107	九江	九江2007	九江市2007	11.4276	16.7169	13.8385			0	0	0	12.59	0.3371	15.8725	5.41292	0.546778	1.37421	1.4841	7	33.06	219.37	12	7629	0	0	0	1	0	1
360000	江西省	地级市	2008	九江市	107	九江	九江2008	九江市2008	12.0293	31.2259	19.5935			0	0	0	14.785	0.3196	17.7956	5.48403	0.547309	1.38347	1.84641	10	33.08	221.11	13	2743	0	0	0	1	0	1
360000	江西省	地级市	2009	九江市	107	九江	九江2009	九江市2009	10.3702	15.9081	12.8626			0	0	0	17.42	0.3254	21.0533	6.07463	0.448129	1.63579	2.32084	15	35.88	224.83	25	7922	0	0	0	1	0	1
360000	江西省	地级市	2010	九江市	107	九江	九江2010	九江市2010	11.1391	17.7822	14.1006			0	0	0	21.862	0.3395	24.7462	6.88556	0.469365	1.67086	2.8252	27	34.33	224.83	27	4465	0	0	0	1	0	1
360000	江西省	地级市	2011	九江市	107	九江	九江2011	九江市2011	17.6397	9.98999	13.3099			0	0	0	26.464	0.3941	29.456	8.04113	0.524058	1.61382	3.4748	21	32.85	224.26	27	7849	0	0	0	1	0	1
360000	江西省	地级市	2012	九江市	107	九江	九江2012	九江市2012	16.4744	14.4764	15.4455			0	0	0	29.785	0.419	33.8949	9.99017	0.55692	1.704	4.11936	36	34.71	226.38	27	7270	0	0	0	1	0	1
360000	江西省	地级市	2013	九江市	107	九江	九江2013	九江市2013	15.9912	13.8241	14.8711			0	0	0	31.53	0.425	39.5177	10.9976	1.12959	1.75753	4.73864	52	35.8	227.68	33	7925	0	0	0	1	0	1
360000	江西省	地级市	2014	九江市	107	九江	九江2014	九江市2014	19.6509	15.2655	17.3316			0	0	0	37.097	0.45442	44.4043	12.0037	1.23845	1.74676	5.20625	52	36.98	229.3	16	6717	0	0	0	1	0	1
360000	江西省	地级市	2015	九江市	107	九江	九江2015	九江市2015	27.8002	17.3375	22.0193			0	0	0	39.505	0.46809	51.065	12.9923	1.17008	1.90533	5.66795	89	39.28	231.88	18	6915	0	0	0	1	0	1
360000	江西省	地级市	2016	九江市	107	九江	九江2016	九江市2016	26.9106	18.5112	22.3614			0	0	0	43.338	0.43524	56.331	12.4286	1.2644	2.07448	6.2707	153	40.77	233.49	34	7829	0	0	0	1	0	1
360000	江西省	地级市	2017	九江市	107	九江	九江2017	九江市2017	8.62443	18.5622	12.7111			0	0	0	49.306	0.44414	61.938	10.9472	1.44552	2.08063	7.04245	135			26	5382	0	0	0	1	0	1
360000	江西省	地级市	2018	九江市	107	九江	九江2018	九江市2018	9.85674	16.504	12.7811			0	0	0	55.274	0.39863	71.921	9.92133	2.08797	2.17928	7.87117	303	42.52	235.53	33	6448	0	0	0	1	0	1
360000	江西省	地级市	2019	九江市	107	九江	九江2019	九江市2019	12.4701	19.9285	15.7977			0	0	0	63.584	0.4136	77.121	9.09522	2.69865	2.16027	8.85744	184	44.83	238.04	18	4844	0	0	0	1	0	1
360000	江西省	地级市	2020	九江市	107	九江	九江2020	九江市2020	16.0468	18.4443	17.2073			0	0	0	70.34	0.43672	81.455	8.83805	2.37857	2.36346	9.75724	285	45.6	238.53	7	4884	0	0	0	1	0	1
620000	甘肃省	地级市	2006	酒泉市	108	酒泉	酒泉2006	酒泉市2006	2.16094	5.34288	3.40388			0	0	0	17.626	0.0968	21.625	2.96701	0.337446	2.01102	0.30031	2	35.93	216.23	9	5906	0	0	0	0	0	1
620000	甘肃省	地级市	2007	酒泉市	108	酒泉	酒泉2007	酒泉市2007	2.19463	5.19666	3.38245			0	0	0	20.524	0.0993	24.1974	3.73924	0.746277	1.85847	0.371024	4	34.78	214.95	11	6282	0	0	0	0	0	1
620000	甘肃省	地级市	2008	酒泉市	108	酒泉	酒泉2008	酒泉市2008	3.459	6.54986	4.76561			0	0	0	24.759	0.0988	27.0169	3.44641	0.976903	1.74355	0.461602	6	33.55	216.15	31	6058	0	0	0	0	0	1
620000	甘肃省	地级市	2009	酒泉市	108	酒泉	酒泉2009	酒泉市2009	9.09742	6.49791	7.69272			0	0	0	31.512	0.0923	30.5573	3.00547	0.826146	1.72762	0.580211	3	37.05	222.42	16	6301	0	0	0	0	0	1
620000	甘肃省	地级市	2010	酒泉市	108	酒泉	酒泉2010	酒泉市2010	8.65611	8.32479	8.4889			0	0	0	39.562	0.0957	32.8201	2.9398	0.758708	1.79285	0.7063	14	34.73	221.35	28	6296	0	0	0	0	0	1
620000	甘肃省	地级市	2011	酒泉市	108	酒泉	酒泉2011	酒泉市2011	8.22495	7.86136	8.04118			0	0	0	43.825	0.1026	37.0968	3.42684	0.737444	1.82413	0.8687	21	35.42	223.15	23	6722	0	0	0	0	0	1
620000	甘肃省	地级市	2012	酒泉市	108	酒泉	酒泉2012	酒泉市2012	8.26414	9.80258	9.00201			0	0	0	52.116	0.11	41.7032	3.68586	0.762636	1.67341	1.02984	14	34.36	222.21	23	6556	0	0	0	0	0	1
620000	甘肃省	地级市	2013	酒泉市	108	酒泉	酒泉2013	酒泉市2013	7.74409	11.7989	9.56885			0	0	0	57.832	0.15	43.8625	4.15922	0.945664	1.9207	1.18466	29	36.39	225.8	10	5406	0	0	0	0	0	1
620000	甘肃省	地级市	2014	酒泉市	108	酒泉	酒泉2014	酒泉市2014	2.52936	12.6533	5.7119			0	0	0	55	0.14976	49.7573	5.27808	1.11226	2.33617	1.30156	19	40.49	228.81	11	4868	0	0	0	0	0	1
620000	甘肃省	地级市	2015	酒泉市	108	酒泉	酒泉2015	酒泉市2015	2.56163	13.3649	5.91285			0	0	0	48.92	0.14474	54.778	6.34329	0.860928	2.93308	1.41699	30	48.49	234.06	12	4870	0	0	0	0	0	1
620000	甘肃省	地级市	2016	酒泉市	108	酒泉	酒泉2016	酒泉市2016	3.14636	12.902	6.4238			0	0	0	51.721	0.14918	56.144	6.26693	0.583136	2.85742	1.56767	36	49.92	234.83	13	6707	0	0	0	0	0	1
620000	甘肃省	地级市	2017	酒泉市	108	酒泉	酒泉2017	酒泉市2017	3.55812	25.7371	9.81349			0	0	0	49.2	0.12938	61.395	6.25303	0.617375	3.00498	1.76061	41			27	6325	0	0	0	0	0	1
620000	甘肃省	地级市	2018	酒泉市	108	酒泉	酒泉2018	酒泉市2018	4.94527	29.238	12.3291			0	0	0	53.043	0.11761	67.16	6.11864	0.723297	2.87161	1.96779	136	53.65	241.28	38	6978	0	0	0	0	0	1
620000	甘肃省	地级市	2019	酒泉市	108	酒泉	酒泉2019	酒泉市2019	4.34789	39.5297	13.6959			0	0	0	54.729	0.13294	72.88	5.98904	0.41492	2.94896	2.21436	74	43.83	228.77	44	5775	0	0	0	0	0	1
620000	甘肃省	地级市	2020	酒泉市	108	酒泉	酒泉2020	酒泉市2020	3.17502	30.3281	10.1571			0	0	0	62.187	0.13367	80.752	5.49626	0.546837	2.75746	2.43931	86	41.55	224.32	26	6120	0	0	0	0	0	1
410000	河南省	地级市	2006	开封市	109	开封	开封2006	开封市2006	15.5806	4.65009	8.57954			0	0	0	9.645	0.2935	13.1222	3.42188	0.182834	1.23817	0.90093	10	30.77	203.17	6	5460	0	0	0	1	0	0
410000	河南省	地级市	2007	开封市	109	开封	开封2007	开封市2007	18.2107	3.67893	8.29774			0	0	0	11.855	0.2831	14.4321	3.65765	1.11889	1.1406	1.11307	19	32.36	207.93	18	6720	0	0	0	1	0	0
410000	河南省	地级市	2008	开封市	109	开封	开封2008	开封市2008	20.3517	9.2352	13.7825			0	0	0	14.713	0.2644	15.5867	3.78978	1.15745	0.996919	1.38481	15	32.39	210.1	16	6499	0	0	0	1	0	0
410000	河南省	地级市	2009	开封市	109	开封	开封2009	开封市2009	19.7038	4.0084	9.01863			0	0	0	16.571	0.3149	21.2324	3.7946	1.05434	1.15224	1.74063	16	33.95	212.32	19	7450	0	0	0	1	0	0
410000	河南省	地级市	2010	开封市	109	开封	开封2010	开封市2010	19.4164	3.64987	8.54916			0	0	0	19.75	0.331	24.0902	3.99399	1.04731	1.16957	2.1189	41	33.13	209.46	21	6817	0	0	0	1	0	0
410000	河南省	地级市	2011	开封市	109	开封	开封2011	开封市2011	19.8728	3.58444	8.57859			0	0	0	22.972	0.3911	27.447	4.57353	1.04983	1.1482	2.6061	48	34	211.85	20	7441	0	0	0	1	0	0
410000	河南省	地级市	2012	开封市	109	开封	开封2012	开封市2012	26.4044	4.15499	10.7263			0	0	0	25.922	0.409	26.7984	5.12964	1.08315	1.25558	3.08952	35	34.47	213.12	10	6800	0	0	0	1	0	0
410000	河南省	地级市	2013	开封市	109	开封	开封2013	开封市2013	24.2559	3.13234	8.93459			0	0	0	24.657	0.477	35.3202	5.92147	1.12202	1.34479	3.55398	58	34.73	214.17	16	4814	0	0	0	1	0	0
410000	河南省	地级市	2014	开封市	109	开封	开封2014	开封市2014	20.457	3.01419	8.00529			0	0	0	32.454	0.47301	35.7494	6.4466	1.09105	1.43325	3.90469	76	35.45	216.34	28	6997	0	0	0	1	0	0
410000	河南省	地级市	2015	开封市	109	开封	开封2015	开封市2015	20.0966	3.73196	8.80093			0	0	0	35.326	0.48941	43.535	6.74258	0.960554	1.53828	4.25096	80	41.38	223.7	22	6959	0	0	0	1	0	0
410000	河南省	地级市	2016	开封市	109	开封	开封2016	开封市2016	24.3153	3.48673	9.42441			0	0	0	38.619	0.53749	48.807	6.45047	1.05184	1.61127	4.70303	105	42.99	226.6	22	7695	0	0	0	1	0	0
410000	河南省	地级市	2017	开封市	109	开封	开封2017	开封市2017	14.464	4.16657	7.8229			0	0	0	41.503	0.52143	51.541	6.50275	0.99144	1.7312	5.28184	101			18	8107	0	0	0	1	0	0
410000	河南省	地级市	2018	开封市	109	开封	开封2018	开封市2018	14.6001	6.58401	9.84256			0	0	0	43.936	0.39054	57.39	7.02396	1.20657	1.77714	5.90338	174	47.44	233.8	26	7797	0	0	0	1	0	0
410000	河南省	地级市	2019	开封市	109	开封	开封2019	开封市2019	16.2359	8.38869	11.7072			0	0	0	51.733	0.37519	59.288	6.55062	1.57213	1.67059	6.64308	97	46.39	232.93	24	7351	0	0	0	1	0	0
410000	河南省	地级市	2020	开封市	109	开封	开封2020	开封市2020	17.3505	9.81048	13.0809			0	0	0	49.166	0.37354	60.758	6.75809	2.01458	1.85888	7.31793	165	46.84	231.51	23	7269	0	0	0	1	0	0
650000	新疆维吾尔自治区	地级市	2006	克拉玛依市	110	克拉	克拉2006	克拉玛依市2006	6.98258	6.95288	6.96772			0	0	0	96.006	0.1486	25.965	6.08601	0.125399	0.866977	0	1	18.23	209.47	17	6579	0	0	0	0	0	0
650000	新疆维吾尔自治区	地级市	2007	克拉玛依市	110	克拉	克拉2007	克拉玛依市2007	8.56884	8.54711	8.55797			0	0	0	98.938	0.1595	30.884	7.08222	3.26049	0.866977	0	3	18.23	209.43	0	0	0	0	0	0	0	0
650000	新疆维吾尔自治区	地级市	2008	克拉玛依市	110	克拉	克拉2008	克拉玛依市2008	5.93001	7.45846	6.65191			0	0	0	100.216	0.1661	34.3192	5.92035	2.71722	0.866977	0	7	18.23	208.13	2	1442	0	0	0	0	0	0
650000	新疆维吾尔自治区	地级市	2009	克拉玛依市	110	克拉	克拉2009	克拉玛依市2009	7.16773	7.4276	7.29655			0	0	0	87	0.1568	37.4518	6.92836	1.89019	1.3208	0	9	18.23	212.03	0	0	0	0	0	0	0	0
650000	新疆维吾尔自治区	地级市	2010	克拉玛依市	110	克拉	克拉2010	克拉玛依市2010	7.85393	7.96618	7.90986			0	0	0	121.387	0.1576	38.5763	5.96473	1.81537	1.32583	0	13	18.23	209.27	22	6803	0	0	0	0	0	0
650000	新疆维吾尔自治区	地级市	2011	克拉玛依市	110	克拉	克拉2011	克拉玛依市2011	11.3967	6.6326	8.70799			0	0	0	129.105	0.1659	59.1514	6.35723	1.89579	1.23922	0	6	18.23	209.65	0	0	0	0	0	0	0	0
650000	新疆维吾尔自治区	地级市	2012	克拉玛依市	110	克拉	克拉2012	克拉玛依市2012	12.5366	5.99214	8.69282			0	0	0	135.018	0.19	71.8634	7.06302	1.90623	1.33108	0	14	18.23	210.9	0	0	0	0	0	0	0	0
650000	新疆维吾尔自治区	地级市	2013	克拉玛依市	110	克拉	克拉2013	克拉玛依市2013	17.3566	7.6212	11.5571			0	0	0	159.322	0.171	84.5755	7.71599	1.88557	1.67882	0	21	22.49	221.97	0	0	0	0	0	0	0	0
650000	新疆维吾尔自治区	地级市	2014	克拉玛依市	110	克拉	克拉2014	克拉玛依市2014	20.7696	6.62665	11.8457			0	0	0	153.084	0.17058	86.3582	8.67648	1.49899	1.54286	0	47	23.91	223.32	0	0	0	0	0	0	0	0
650000	新疆维吾尔自治区	地级市	2015	克拉玛依市	110	克拉	克拉2015	克拉玛依市2015	25.7703	5.76731	12.4079			0	0	0	131.014	0.17471	84.559	11.9144	1.67916	2.85419	0	63	33.96	233.14	0	0	0	0	0	0	0	0
650000	新疆维吾尔自治区	地级市	2016	克拉玛依市	110	克拉	克拉2016	克拉玛依市2016	24.2542	6.41593	12.6512			0	0	0	137.307	0.1673	87.001	12.7443	1.41015	2.69589	0	62	29.59	228.73	6	6328	0	0	0	0	0	0
650000	新疆维吾尔自治区	地级市	2017	克拉玛依市	110	克拉	克拉2017	克拉玛依市2017	26.9656	8.19676	15.0659			0	0	0	145.798	0.17636	96.948	11.7461	1.50023	2.40674	0	62			12	6539	0	0	0	0	0	0
650000	新疆维吾尔自治区	地级市	2018	克拉玛依市	110	克拉	克拉2018	克拉玛依市2018	31.4793	9.06204	17.1709			0	0	0	153.647	0.17722	108.091	11.1882	1.23281	2.63441	0	85	26.54	225.98	22	7153	0	0	0	0	0	0
650000	新疆维吾尔自治区	地级市	2019	克拉玛依市	110	克拉	克拉2019	克拉玛依市2019	32.951	9.38738	17.8975			0	0	0	159.322	0.1491	108.091	10.8672	1.12081	2.51015	0	73	31.3	229.63	30	7636	0	0	0	0	0	0
650000	新疆维吾尔自治区	地级市	2020	克拉玛依市	110	克拉	克拉2020	克拉玛依市2020	26.0753	9.38485	15.8035			0	0	0	159.322	0.14982	108.091	8.93901	1.22266	2.75534	0	86	30.67	228.77	9	7408	0	0	0	0	0	0
530000	云南省	地级市	2006	昆明市	111	昆明	昆明2006	昆明市2006	65.0679	38.3126	50.3346	2010	4	1	0	0	19.475	0.8045	20.8115	8.59084	0.327357	4.35865	4.50465	83	47.09	240.32	19	6795	0	0	0	1	1	1
530000	云南省	地级市	2007	昆明市	111	昆明	昆明2007	昆明市2007	65.1608	38.857	50.7104	2010	3	1	0	0	21.711	0.8771	22.4322	9.47294	1.43495	4.96948	5.56536	125	47.3	240.63	15	5995	0	0	0	1	1	1
530000	云南省	地级市	2008	昆明市	111	昆明	昆明2008	昆明市2008	79.6577	58.8645	68.7151	2010	6	1	0	0	25.826	0.9275	22.4322	11.5758	1.47118	5.54379	6.92403	127	50.29	243.35	30	8854	0	0	0	1	1	1
530000	云南省	地级市	2009	昆明市	111	昆明	昆明2009	昆明市2009	59.6816	48.6003	53.9265	2010	-1	1	0	0	25.826	0.9396	29.8892	11.1471	1.56648	6.24789	8.70317	213	48.1	241.79	33	8577	0	0	0	1	1	1
530000	云南省	地级市	2010	昆明市	111	昆明	昆明2010	昆明市2010	77.0666	52.6814	64.0485	2010	0	1	1	1	33.55	0.9896	32.0221	11.9711	1.28065	6.19613	10.5945	251	49.01	243.34	35	6611	0	0	0	1	1	1
530000	云南省	地级市	2011	昆明市	111	昆明	昆明2011	昆明市2011	88.3592	57.9787	72.08	2010	1	1	1	1	38.831	1.1083	41.6452	12.6591	1.81898	5.91451	13.0305	360	48.4	243.07	39	8233	0	0	0	1	1	1
530000	云南省	地级市	2012	昆明市	111	昆明	昆明2012	昆明市2012	64.7533	85.1138	74.4655	2010	2	1	1	1	46.256	1.198	45.0935	12.5665	1.84682	5.64734	15.4476	425	48.93	243.64	26	6560	0	0	1	1	1	1
530000	云南省	地级市	2013	昆明市	111	昆明	昆明2013	昆明市2013	127.416	68.9599	95.5207	2010	-3	1	1	1	62.437	1.373	51.0608	13.198	2.07779	5.63169	17.7699	557	50.03	245.08	25	6037	0	0	1	1	1	1
530000	云南省	地级市	2014	昆明市	111	昆明	昆明2014	昆明市2014	155.307	74.922	111.139	2010	-4	1	1	1	56.236	1.2161	58.1534	12.873	2.11766	5.59751	19.5234	671	53.67	248.78	21	4855	0	0	1	1	1	1
530000	云南省	地级市	2015	昆明市	111	昆明	昆明2015	昆明市2015	139.516	110.825	121.9	2010	-5	1	1	1	59.656	1.32826	62.033	12.6566	2.35082	6.01213	21.2548	746	55.28	250.54	23	5494	0	0	1	1	1	1
530000	云南省	地级市	2016	昆明市	111	昆明	昆明2016	昆明市2016	130.102	133.706	121.9	2010	-2	1	1	1	64.156	1.33597	68.375	12.3254	2.20187	6.09979	23.5151	1049	56.73	252.07	15	6360	0	0	1	1	1	1
530000	云南省	地级市	2018	昆明市	111	昆明	昆明2018	昆明市2018	83.9591	167.991	121.9	2010	8	1	1	1	76.387	1.33668	80.253	11.4393	2.37941	5.73984	29.5169	1802	56.59	252.32	18	7219	0	0	1	1	1	1
530000	云南省	地级市	2019	昆明市	111	昆明	昆明2019	昆明市2019	83.0577	167.513	121.499	2010	9	1	1	1	93.853	1.17279	94.063	9.7287	2.29823	5.05925	33.2154	1431	63.73	259.56	21	7681	0	0	1	1	1	1
530000	云南省	地级市	2020	昆明市	111	昆明	昆明2020	昆明市2020	77.6315	152.981	111.85	2010	10	1	1	1	80.584	1.12637	102.304	9.65955	1.92847	5.35567	36.5897	1598	64.14	259.51	19	9870	0	0	1	1	1	1
530000	云南省	地级市	2017	昆明市	111	昆明	昆明2017	昆明市2017	89.5511	172.355	121.9	2010	7	1	1	1	71.906	1.34799	76.35	11.546	2.17721	5.8168	26.4092	1137			12	7938	0	0	1	1	1	1
450000	广西壮族自治区	地级市	2006	来宾市	112	来宾	来宾2006	来宾市2006	10.4966	57.8501	25.8081			0	0	0	8.23	0.1049	18.2437	4.24101	0.155386	0.930547	0		26.41	195.88	0	0	0	0	0	1	0	0
450000	广西壮族自治区	地级市	2007	来宾市	112	来宾	来宾2007	来宾市2007	8.01882	61.427	23.5966			0	0	0	10.852	0.1087	22.1806	4.23396	0.268124	0.943387	0	1	26.61	195.88	16	6587	0	0	0	1	0	0
450000	广西壮族自治区	地级市	2008	来宾市	112	来宾	来宾2008	来宾市2008	15.1869	96.28	41.5612			0	0	0	11.903	0.1117	25.4212	5.39093	0.336879	1.04978	0		29.23	201.17	12	4521	0	0	0	1	0	0
450000	广西壮族自治区	地级市	2009	来宾市	112	来宾	来宾2009	来宾市2009	6.34955	79.971	24.9488			0	0	0	12.967	0.1138	27.9758	6.84237	0.399063	1.26566	0	1	29.91	203.06	26	7557	0	0	0	1	0	0
450000	广西壮族自治区	地级市	2010	来宾市	112	来宾	来宾2010	来宾市2010	3.62985	62.3791	16.4597			0	0	0	18.369	0.1185	30.3885	6.15928	0.342172	1.1861	0	3	28.41	204.23	28	7891	0	0	0	1	0	0
450000	广西壮族自治区	地级市	2011	来宾市	112	来宾	来宾2011	来宾市2011	3.16876	49.8869	13.4802			0	0	0	23.055	0.1222	31.1042	5.1621	0.582436	1.17435	0	3	27.58	202.82	29	9483	0	0	0	1	0	0
450000	广西壮族自治区	地级市	2012	来宾市	112	来宾	来宾2012	来宾市2012	3.79811	59.9827	16.4126			0	0	0	24.183	0.13	35.5182	6.26204	0.980988	1.29349	0	4	29.4	204.7	27	8639	0	0	0	1	0	0
450000	广西壮族自治区	地级市	2013	来宾市	112	来宾	来宾2013	来宾市2013	4.55448	47.4328	15.544			0	0	0	20.139	0.141	41.8526	7.05501	1.22919	1.45071	0	13	31.35	205.29	10	3845	0	0	0	1	0	0
450000	广西壮族自治区	地级市	2014	来宾市	112	来宾	来宾2014	来宾市2014	3.00891	66.2624	15.6525			0	0	0	25.563	0.13588	43.5058	6.88451	1.27337	1.49661	0	6	34.39	210.18	20	6480	0	0	0	1	0	0
450000	广西壮族自治区	地级市	2015	来宾市	112	来宾	来宾2015	来宾市2015	4.13126	84.6758	21.2715			0	0	0	25.667	0.13792	43.588	5.43059	0.488013	1.58973	0	19	36.41	211.92	10	6163	0	0	0	1	0	0
450000	广西壮族自治区	地级市	2016	来宾市	112	来宾	来宾2016	来宾市2016	5.24175	82.2428	23.2737			0	0	0	26.885	0.12749	59.982	5.1471	0.284752	1.71808	0	20	37.63	212.61	18	5268	0	0	0	1	0	0
450000	广西壮族自治区	地级市	2017	来宾市	112	来宾	来宾2017	来宾市2017	4.20205	82.7119	21.1064			0	0	0	30.037	0.12516	64.152	4.16391	0.142106	1.76229	0	19			21	7226	0	0	0	1	0	0
450000	广西壮族自治区	地级市	2018	来宾市	112	来宾	来宾2018	来宾市2018	2.96489	73.1492	16.5621			0	0	0	31.102	0.12532	69.61	4.01335	0.127555	1.81754	0	28	41.64	217.83	15	8422	0	0	0	1	0	0
450000	广西壮族自治区	地级市	2019	来宾市	112	来宾	来宾2019	来宾市2019	3.90929	58.8944	16.4514			0	0	0	29.215	0.12852	69.576	5.25295	0.118459	2.07914	0	10	47.01	221.9	20	9258	0	0	0	1	0	0
450000	广西壮族自治区	地级市	2020	来宾市	112	来宾	来宾2020	来宾市2020	3.83128	59.8238	16.4531			0	0	0	33.939	0.13768	76.582	5.58204	0.118459	2.19634	0	26	47.73	222.66	24	9159	0	0	0	1	0	0
620000	甘肃省	地级市	2017	兰州市	113	兰州	兰州2017	兰州市2017	42.9704	27.3789	34.4418	2010	7	1	1	1	67.269	0.7414	75.709	9.365	1.58028	6.44195	10.5637	500			9	3620	0	0	1	0	1	0
620000	甘肃省	地级市	2006	兰州市	113	兰州	兰州2006	兰州市2006	9.10534	11.8152	10.3766	2010	4	1	0	0	20.419	0.5671	19.1031	5.1908	0.402806	4.3924	1.80186	57	50.96	247.4	4	6183	0	0	0	0	1	0
620000	甘肃省	地级市	2007	兰州市	113	兰州	兰州2007	兰州市2007	9.90972	8.57214	9.21779	2010	3	1	0	0	22.325	0.5646	21.0189	6.36303	1.63569	4.28206	2.22614	53	50.57	247.01	6	6288	0	0	0	0	1	0
620000	甘肃省	地级市	2008	兰州市	113	兰州	兰州2008	兰州市2008	13.1539	8.53469	10.6085	2010	6	1	0	0	25.628	0.4899	26.1199	6.01004	1.74714	4.34436	2.76961	81	49.62	246.3	18	5917	0	0	0	0	1	0
620000	甘肃省	地级市	2009	兰州市	113	兰州	兰州2009	兰州市2009	17.5348	10.2558	13.4421	2010	-1	1	0	0	27.904	0.5029	28.9956	6.15978	1.49448	4.99836	3.48127	58	49.87	246.57	16	6247	0	0	0	0	1	0
620000	甘肃省	地级市	2010	兰州市	113	兰州	兰州2010	兰州市2010	19.7484	10.1823	14.2349	2010	0	1	1	1	34.009	0.5136	33.9638	6.61201	1.3715	5.08468	4.2378	112	48.84	245.77	12	5551	0	0	0	0	1	0
620000	甘肃省	地级市	2011	兰州市	113	兰州	兰州2011	兰州市2011	42.2353	14.6663	25.319	2010	1	1	1	1	37.57	0.5237	38.9681	6.3594	1.30607	4.96417	5.2122	159	48.78	245.82	10	7899	0	0	0	0	1	0
620000	甘肃省	地级市	2012	兰州市	113	兰州	兰州2012	兰州市2012	37.5126	15.3949	24.3132	2010	2	1	1	1	43.175	0.541	44.4884	6.63314	1.38161	5.28329	6.17905	183	49.53	246.68	10	7899	0	0	0	0	1	0
620000	甘肃省	地级市	2013	兰州市	113	兰州	兰州2013	兰州市2013	33.6646	10.4405	19.0516	2010	-3	1	1	1	48.138	0.654	49.345	7.00877	1.25752	5.5773	7.10796	270	51.05	248.3	20	5629	0	0	0	0	1	0
620000	甘肃省	地级市	2014	兰州市	113	兰州	兰州2014	兰州市2014	51.9549	14.9468	28.6238	2010	-4	1	1	1	54.771	0.6711	54.0084	7.61292	1.12879	6.11225	7.80938	235	56.15	253.51	33	8291	0	0	0	0	1	0
620000	甘肃省	地级市	2015	兰州市	113	兰州	兰州2015	兰州市2015	52.3041	14.936	28.7212	2010	-5	1	1	1	56.972	0.6718	62.201	8.83552	1.20238	6.44195	8.50193	282	59.98	257.3	17	6340	0	0	0	0	1	0
620000	甘肃省	地级市	2016	兰州市	113	兰州	兰州2016	兰州市2016	51.636	13.9068	27.5786	2010	-2	1	1	1	61.207	0.68567	67.011	9.51667	1.0646	6.44195	9.40605	418	62.44	259.77	38	9344	0	0	0	0	1	0
620000	甘肃省	地级市	2018	兰州市	113	兰州	兰州2018	兰州市2018	50.0648	27.2566	37.2404	2010	8	1	1	1	73.042	0.75119	85.575	9.26903	1.30083	6.44195	11.8068	664	64.11	262.54	11	6801	0	1	1	0	1	0
620000	甘肃省	地级市	2019	兰州市	113	兰州	兰州2019	兰州市2019	53.3416	26.8802	38.2673	2010	9	1	1	1	75.217	0.70027	88.393	8.22087	1.72879	6.44195	13.2862	505	64.87	263.07	22	7425	0	1	1	0	1	0
620000	甘肃省	地级市	2020	兰州市	113	兰州	兰州2020	兰州市2020	47.7709	26.9731	36.1464	2010	10	1	1	1	66.68	0.78504	93.847	8.56013	1.56496	6.44195	14.6359	704	65.68	263.69	37	7098	0	1	1	0	1	0
130000	河北省	地级市	2006	廊坊市	114	廊坊	廊坊2006	廊坊市2006	10.6745	0.61678	2.60574			0	0	0	18.327	0.2486	17.4459	4.18391	0.379928	1.78642	0.30031	17	29.46	214.78	13	6977	0	0	0	1	0	1
130000	河北省	地级市	2007	廊坊市	114	廊坊	廊坊2007	廊坊市2007	13.2781	0.34845	2.20192			0	0	0	21.917	0.2571	22.0283	5.14079	1.62705	1.84518	0.371024	33	30.17	216.98	15	6726	0	0	0	1	0	1
130000	河北省	地级市	2008	廊坊市	114	廊坊	廊坊2008	廊坊市2008	13.9068	3.60007	7.13475			0	0	0	25.757	0.2708	28.636	5.51084	1.3958	1.90273	0.461602	20	31.06	218.76	23	5949	0	0	0	1	0	1
130000	河北省	地级市	2009	廊坊市	114	廊坊	廊坊2009	廊坊市2009	15.0096	0.95528	3.8669			0	0	0	27.904	0.3017	31.4748	6.03609	1.56022	2.31205	0.580211	37	34.52	222.46	16	3443	0	0	0	1	0	1
130000	河北省	地级市	2010	廊坊市	114	廊坊	廊坊2010	廊坊市2010	14.3779	1.75587	5.10126			0	0	0	31.844	0.3464	37.226	7.8354	1.31035	2.44542	0.7063	57	34.77	223.11	13	5682	0	0	0	1	0	1
130000	河北省	地级市	2011	廊坊市	114	廊坊	廊坊2011	廊坊市2011	12.5095	2.91528	6.08929			0	0	0	36.773	0.3953	39.9791	8.70356	1.22467	2.35994	0.8687	83	34.85	224.03	11	3604	0	0	0	1	0	1
130000	河北省	地级市	2012	廊坊市	114	廊坊	廊坊2012	廊坊市2012	14.1048	4.27531	7.82037			0	0	0	40.598	0.421	45.4264	9.59398	1.25684	2.5012	1.02984	121	34.96	223.9	25	7112	0	0	0	1	0	1
130000	河北省	地级市	2013	廊坊市	114	廊坊	廊坊2013	廊坊市2013	20.1205	4.09337	9.21241			0	0	0	46.046	0.439	49.6306	10.5723	1.08176	2.81009	1.18466	135	37.16	226.92	31	7547	0	0	0	1	0	1
130000	河北省	地级市	2014	廊坊市	114	廊坊	廊坊2014	廊坊市2014	24.4035	4.37823	10.5458			0	0	0	48.407	0.45231	57.1773	11.5115	0.973322	2.96916	1.30156	160	42.5	233.07	39	7216	0	0	0	1	0	1
130000	河北省	地级市	2015	廊坊市	114	廊坊	廊坊2015	廊坊市2015	33.0091	3.88968	11.7381			0	0	0	54.46	0.44454	64.724	12.2636	0.863294	3.33235	1.41699	253	47.1	238.75	36	6880	0	0	0	1	0	1
130000	河北省	地级市	2016	廊坊市	114	廊坊	廊坊2016	廊坊市2016	30.618	4.39408	11.9429			0	0	0	58.972	0.45949	72.744	12.5161	1.50235	4.09604	1.56767	293	48.6	241.27	58	7414	0	0	0	1	0	1
130000	河北省	地级市	2017	廊坊市	114	廊坊	廊坊2017	廊坊市2017	12.37	9.38216	10.7784			0	0	0	61.586	0.96083	77.665	11.5055	1.14707	4.14235	1.76061	337			25	7963	0	0	0	1	0	1
130000	河北省	地级市	2018	廊坊市	114	廊坊	廊坊2018	廊坊市2018	13.4589	10.8041	12.063			0	0	0	64.906	0.39793	86.177	11.6476	0.90278	3.98353	1.96779	491	57.06	250.73	31	7624	0	0	0	1	0	1
130000	河北省	地级市	2019	廊坊市	114	廊坊	廊坊2019	廊坊市2019	14.1442	12.8172	13.4655			0	0	0	65.512	0.39077	91.534	12.1508	1.161	4.15007	2.21436	344	60.44	253.81	8	4140	0	0	0	1	0	1
130000	河北省	地级市	2020	廊坊市	114	廊坊	廊坊2020	廊坊市2020	19.84	12.8227	15.9796			0	0	0	60.989	0.39168	92.653	10.9093	1.42329	4.35328	2.43931	557	62.34	255.63	11	4348	0	0	0	1	0	1
510000	四川省	地级市	2006	乐山市	115	乐山	乐山2006	乐山市2006	76.6534	60.1787	68.0686			0	0	0	10.879	0.2934	13.6301	4.71887	0.261697	1.68766	0.60062	13	27.87	210.42	7	6202	0	0	0	1	0	0
510000	四川省	地级市	2007	乐山市	115	乐山	乐山2007	乐山市2007	61.7586	68.2571	64.9501			0	0	0	13.475	0.2908	15.5552	5.12454	0.864912	1.54156	0.742048	25	26.14	207.85	17	7683	0	0	0	1	0	0
510000	四川省	地级市	2008	乐山市	115	乐山	乐山2008	乐山市2008	75.5451	76.5973	76.07			0	0	0	16.737	0.2994	18.3559	5.16581	0.702962	1.51002	0.923204	28	24.72	208.1	8	6891	0	0	0	1	0	0
510000	四川省	地级市	2009	乐山市	115	乐山	乐山2009	乐山市2009	57.4628	77.4458	66.9315			0	0	0	18.379	0.2932	23.1127	5.54101	0.871501	1.78891	1.16042	37	28.08	213.32	8	5261	0	0	0	1	0	0
510000	四川省	地级市	2010	乐山市	115	乐山	乐山2010	乐山市2010	51.1819	82.7459	65.6282			0	0	0	22.99	0.2884	27.1995	6.15252	0.902269	1.95355	1.4126	54	27.07	213.62	6	4835	0	0	0	1	0	0
510000	四川省	地级市	2011	乐山市	115	乐山	乐山2011	乐山市2011	51.0536	85.4743	66.7116			0	0	0	28.339	0.2818	31.7994	6.55773	0.846196	1.8825	1.7374	38	25.72	213.24	12	5709	0	0	0	1	0	0
510000	四川省	地级市	2012	乐山市	115	乐山	乐山2012	乐山市2012	61.4467	89.1266	74.4218			0	0	0	30.386	0.278	37.0113	6.78428	0.852793	1.99665	2.05968	56	26.03	214.11	15	3949	0	0	0	1	0	0
510000	四川省	地级市	2013	乐山市	115	乐山	乐山2013	乐山市2013	91.4789	82.3055	86.8161			0	0	0	31.876	0.293	43.4767	6.61882	0.819279	2.16455	2.36932	70	26.88	215.34	6	3943	0	0	0	1	0	0
510000	四川省	地级市	2014	乐山市	115	乐山	乐山2014	乐山市2014	114.099	85.7648	99.3419			0	0	0	37.125	0.2626	46.6	6.52438	0.852969	2.3204	2.60313	107	29.16	217.97	14	5496	0	0	0	1	0	0
510000	四川省	地级市	2015	乐山市	115	乐山	乐山2015	乐山市2015	117.638	104.241	110.829			0	0	0	39.973	0.29276	54.545	6.57317	0.796106	2.27931	2.83398	94	30.1	219.15	14	5635	0	0	0	1	0	0
510000	四川省	地级市	2016	乐山市	115	乐山	乐山2016	乐山市2016	131.055	108.168	119.326			0	0	0	43.11	0.26533	54.222	6.61888	0.486704	2.25795	3.13535	163	35	224.1	18	6520	0	0	0	1	0	0
510000	四川省	地级市	2017	乐山市	115	乐山	乐山2017	乐山市2017	88.3131	148.163	116.194			0	0	0	46.13	0.26016	66.329	6.58029	0.69244	2.33502	3.52123	144			22	5690	0	0	0	1	0	0
510000	四川省	地级市	2018	乐山市	115	乐山	乐山2018	乐山市2018	100.017	128.858	113.948			0	0	0	49.397	0.24048	76.092	6.80579	0.332989	2.33821	3.93559	170	45.04	234.77	34	5649	0	0	0	1	0	0
510000	四川省	地级市	2019	乐山市	115	乐山	乐山2019	乐山市2019	93.0546	129.442	110.427			0	0	0	56.999	0.23837	82.389	6.26545	0.31711	2.25669	4.42872	180	43.95	230.96	27	6844	0	0	0	1	0	0
510000	四川省	地级市	2020	乐山市	115	乐山	乐山2020	乐山市2020	92.8853	131.794	111.414			0	0	0	63.259	0.2311	87.663	6.02187	0.219924	2.32088	4.87862	223	44.43	229.95	20	7429	0	0	0	1	0	0
530000	云南省	地级市	2006	丽江市	116	丽江	丽江2006	丽江市2006	19.3828	55.2286	33.4392			0	0	0	6.1	0.0645	17.9699	7.24319	0.362439	3.00768	0		46.45	224.47	9	8067	0	0	0	1	0	1
530000	云南省	地级市	2007	丽江市	116	丽江	丽江2007	丽江市2007	19.1234	56.105	33.5206			0	0	0	6.984	0.0736	20.9864	8.58678	0.941015	2.87582	0	2	45.2	223.45	13	6130	0	0	0	1	0	1
530000	云南省	地级市	2008	丽江市	116	丽江	丽江2008	丽江市2008	26.0808	86.2743	49.3994			0	0	0	8.301	0.0752	24.0559	9.41532	0.849023	2.83947	0		44.55	223.92	21	8530	0	0	0	1	0	1
530000	云南省	地级市	2009	丽江市	116	丽江	丽江2009	丽江市2009	16.4416	67.5154	34.722			0	0	0	9.863	0.0829	26.7827	9.66102	0.717542	3.07708	0	1	44.36	225.3	19	6773	0	0	0	1	0	1
530000	云南省	地级市	2010	丽江市	116	丽江	丽江2010	丽江市2010	22.2846	78.8204	43.6439			0	0	0	11.68	0.0872	29.4401	11.4571	0.771252	3.42325	0	2	43.54	225.42	26	6896	0	0	0	1	0	1
530000	云南省	地级市	2011	丽江市	116	丽江	丽江2011	丽江市2011	52.3314	75.4439	63.1313			0	0	0	14.279	0.0948	31.4677	9.936	1.02297	3.35621	0	1	41.24	224.16	34	7851	0	0	0	1	0	1
530000	云南省	地级市	2012	丽江市	116	丽江	丽江2012	丽江市2012	63.3314	85.9311	74.0502			0	0	0	16.87	0.103	35.1267	16.883	0.642435	3.39605	0		40.47	223.22	24	6215	0	0	1	1	0	1
530000	云南省	地级市	2013	丽江市	116	丽江	丽江2013	丽江市2013	38.0589	123.155	72.2762			0	0	0	20.734	0.109	42.1964	16.883	0.78832	3.33723	0	4	38.65	222.59	27	5810	0	0	1	1	0	1
530000	云南省	地级市	2014	丽江市	116	丽江	丽江2014	丽江市2014	32.4442	157.083	79.2312			0	0	0	20.663	0.10782	40.1876	16.883	0.621732	3.44254	0	10	40.06	223.18	25	5474	0	0	1	1	0	1
530000	云南省	地级市	2015	丽江市	116	丽江	丽江2015	丽江市2015	63.4799	167.526	108.576			0	0	0	20.724	0.10832	53.866	16.4943	0.627247	3.33961	0	6	44.83	229.44	26	6839	0	0	1	1	0	1
530000	云南省	地级市	2016	丽江市	116	丽江	丽江2016	丽江市2016	69.6696	172.355	118.627			0	0	0	24.116	0.10296	64.304	15.599	0.701595	3.34392	0	20	45.79	230.5	37	7701	0	0	1	1	0	1
530000	云南省	地级市	2017	丽江市	116	丽江	丽江2017	丽江市2017	29.9136	172.355	99.5952			0	0	0	26.368	0.10418	73.865	11.8015	0.629121	3.30647	0	20			29	6489	0	0	1	1	0	1
530000	云南省	地级市	2018	丽江市	116	丽江	丽江2018	丽江市2018	47.3982	172.355	108.291			0	0	0	27.128	0.09824	85.816	12.2204	0.640749	3.54739	0	13	45.7	230.66	40	7679	0	0	1	1	0	1
530000	云南省	地级市	2019	丽江市	116	丽江	丽江2019	丽江市2019	63.0785	172.355	115.005			0	0	0	36.369	0.08559	97.757	9.60046	0.581932	2.81911	0	27	54.6	240.8	0	0	0	0	1	1	0	1
530000	云南省	地级市	2020	丽江市	116	丽江	丽江2020	丽江市2020	55.3617	170.83	103.965			0	0	0	40.857	0.07924	100.632	8.41133	0.384162	2.72056	0	34	52.63	237.41	26	7054	0	0	1	1	0	1
330000	浙江省	地级市	2006	丽水市	117	丽水	丽水2006	丽水市2006	22.0071	18.8361	20.366			0	0	0	14.104	0.1417	27.3494	7.01833	0.748868	2.2575	1.20124	5	41.31	228.68	20	7166	0	0	0	1	0	1
330000	浙江省	地级市	2007	丽水市	117	丽水	丽水2007	丽水市2007	16.7607	17.0442	16.9019			0	0	0	17.133	0.1473	31.4453	7.52818	2.31914	2.15989	1.4841	10	41.85	230.24	27	6679	0	0	0	1	0	1
330000	浙江省	地级市	2008	丽水市	117	丽水	丽水2008	丽水市2008	16.4366	19.4931	17.9054			0	0	0	22.053	0.1582	36.2418	7.14838	2.25462	2.18101	1.84641	20	40.46	229.55	59	7030	0	0	0	1	0	1
330000	浙江省	地级市	2009	丽水市	117	丽水	丽水2009	丽水市2009	15.8962	17.2306	16.551			0	0	0	23.717	0.1607	41.1411	6.84657	1.86822	2.94454	2.32084	31	41.49	230.74	23	5376	0	0	0	1	0	1
330000	浙江省	地级市	2010	丽水市	117	丽水	丽水2010	丽水市2010	12.7503	18.9712	15.5762			0	0	0	31.296	0.1681	44.9759	6.77563	1.81044	2.9394	2.8252	42	40.97	231.48	24	5829	0	0	0	1	0	1
330000	浙江省	地级市	2011	丽水市	117	丽水	丽水2011	丽水市2011	11.766	16.0159	13.7384			0	0	0	37.706	0.1835	49.0707	7.18626	1.9332	2.82197	3.4748	61	40.57	231.47	36	6604	0	0	0	1	0	1
330000	浙江省	地级市	2012	丽水市	117	丽水	丽水2012	丽水市2012	11.7135	19.5863	15.184			0	0	0	42.244	0.189	56.6091	7.22646	2.10907	2.75112	4.11936	120	40.85	231.97	52	7714	0	0	0	1	0	1
330000	浙江省	地级市	2013	丽水市	117	丽水	丽水2013	丽水市2013	11.2547	17.8969	14.219			0	0	0	37.238	0.18	60.4083	7.49684	1.95719	2.92137	4.73864	147	40.75	232.14	36	6462	0	0	0	1	0	1
330000	浙江省	地级市	2014	丽水市	117	丽水	丽水2014	丽水市2014	10.6577	18.8555	14.2162			0	0	0	49.459	0.17783	66.101	7.69738	2.12037	2.99149	5.20625	164	43.51	235.09	41	5169	0	0	0	1	0	1
330000	浙江省	地级市	2015	丽水市	117	丽水	丽水2015	丽水市2015	14.2691	25.3233	19.0817			0	0	0	51.676	0.1848	77.238	8.56585	1.9507	3.01821	5.66795	169	46.05	237.77	74	5973	0	0	0	1	0	1
330000	浙江省	地级市	2016	丽水市	117	丽水	丽水2016	丽水市2016	16.569	25.7808	20.7186			0	0	0	56.238	0.18435	85.058	8.55753	1.86027	2.95917	6.2707	182	47.2	239.3	66	6715	0	0	0	1	0	1
330000	浙江省	地级市	2017	丽水市	117	丽水	丽水2017	丽水市2017	4.48953	25.4406	10.9156			0	0	0	57.5	0.19021	92.581	9.0258	1.91916	3.14608	7.04245	264			47	6900	0	0	0	1	0	1
330000	浙江省	地级市	2018	丽水市	117	丽水	丽水2018	丽水市2018	8.72697	27.5362	15.7024			0	0	0	63.611	0.19012	103.259	9.32199	2.15715	3.16248	7.87117	407	51.82	245.07	54	6991	0	0	0	1	0	1
330000	浙江省	地级市	2019	丽水市	117	丽水	丽水2019	丽水市2019	17.2832	29.925	22.8367			0	0	0	66.936	0.19508	108.091	9.46712	2.17101	3.5124	8.85744	252	54.52	247.69	58	6280	0	0	0	1	0	1
330000	浙江省	地级市	2020	丽水市	117	丽水	丽水2020	丽水市2020	8.96462	34.1721	17.8534			0	0	0	61.811	0.20533	108.091	9.34127	2.18085	4.05059	9.75724	428	57.14	250.32	46	7445	0	0	0	1	0	1
320000	江苏省	地级市	2006	连云港市	118	连云	连云2006	连云港市2006	18.1441	0.59509	3.38785	2011	5	1	0	0	11.084	0.3041	17.7603	6.43925	0.243219	1.57763	0.60062	13	35.95	217.7	8	6745	0	0	0	1	0	0
320000	江苏省	地级市	2007	连云港市	118	连云	连云2007	连云港市2007	19.2196	2.19031	6.62585	2011	4	1	0	0	12.857	0.3165	21.4851	7.89173	1.55657	1.67291	0.742048	17	36.24	219.21	9	4947	0	0	0	1	0	0
320000	江苏省	地级市	2008	连云港市	118	连云	连云2008	连云港市2008	16.7991	3.95899	8.24546	2011	3	1	0	0	15.458	0.3252	26.4952	8.82702	2.08551	1.71621	0.923204	29	36.3	219.95	18	7441	0	0	0	1	0	0
320000	江苏省	地级市	2009	连云港市	118	连云	连云2009	连云港市2009	23.0406	3.54055	9.22464	2011	6	1	0	0	19.229	0.3331	29.5511	9.58564	1.84993	1.79754	1.16042	32	37.3	220.89	22	7374	0	0	0	1	0	0
320000	江苏省	地级市	2010	连云港市	118	连云	连云2010	连云港市2010	20.0829	3.71252	8.77538	2011	-1	1	0	0	26.987	0.34	33.8374	11.8485	2.10351	1.83529	1.4126	51	39.02	223.72	23	7603	0	0	0	1	0	0
320000	江苏省	地级市	2011	连云港市	118	连云	连云2011	连云港市2011	23.6222	4.34513	10.326	2011	0	1	1	1	32.119	0.3516	38.816	12.7669	2.14558	1.68664	1.7374	59	39.14	224.67	31	8014	0	0	0	1	0	0
320000	江苏省	地级市	2012	连云港市	118	连云	连云2012	连云港市2012	23.2221	4.55093	10.465	2011	1	1	1	1	36.47	0.355	44.1293	13.0309	2.39727	1.68405	2.05968	92	39.6	225.11	22	6191	0	0	0	1	0	0
320000	江苏省	地级市	2013	连云港市	118	连云	连云2013	连云港市2013	23.0862	4.20489	10.0392	2011	2	1	1	1	34.335	0.472	46.2468	13.0671	2.44585	1.70189	2.36932	131	40.26	225.74	18	6795	0	0	0	1	0	0
320000	江苏省	地级市	2014	连云港市	118	连云	连云2014	连云港市2014	14.2133	5.20724	8.65018	2011	-3	1	1	1	44.277	0.4822	52.6141	13.3157	2.66976	1.73051	2.60313	125	41.42	228.11	13	5759	0	0	0	1	0	0
320000	江苏省	地级市	2015	连云港市	118	连云	连云2015	连云港市2015	21.9949	4.89743	10.5371	2011	-4	1	1	1	48.416	0.47672	56.154	13.5039	2.59204	1.80931	2.83398	179	42.53	229.43	12	5558	0	0	0	1	0	0
320000	江苏省	地级市	2016	连云港市	118	连云	连云2016	连云港市2016	24.6755	5.28745	11.6246	2011	-5	1	1	1	52.987	0.4748	61.262	8.89846	2.68814	1.91408	3.13535	255	43.13	230.44	20	7524	0	0	0	1	0	0
320000	江苏省	地级市	2017	连云港市	118	连云	连云2017	连云港市2017	12.3689	7.26887	9.49772	2011	-2	1	1	1	57.16	0.45656	69.726	8.13717	2.25485	2.02658	3.52123	327			21	5745	0	0	0	1	0	0
320000	江苏省	地级市	2019	连云港市	118	连云	连云2019	连云港市2019	24.1282	11.5618	16.7954	2011	8	1	1	1	69.523	0.42699	83.908	7.72348	3.01912	2.25606	4.42872	351	45.03	233.5	18	5910	0	0	0	1	0	0
320000	江苏省	地级市	2020	连云港市	118	连云	连云2020	连云港市2020	26.9936	12.6636	18.6095	2011	9	1	1	1	71.303	0.43474	92.008	7.48158	1.66147	2.57186	4.87862	499	46.35	234.57	34	6870	0	0	0	1	0	0
320000	江苏省	地级市	2018	连云港市	118	连云	连云2018	连云港市2018	22.8849	9.41067	14.7812	2011	7	1	1	1	61.332	0.47279	75.808	8.45362	2.36447	2.2153	3.93559	415	44.69	232.94	21	5081	0	0	0	1	0	0
210000	辽宁省	地级市	2006	辽阳市	119	辽阳	辽阳2006	辽阳市2006	2.76508	2.96437	2.86302			0	0	0	21.562	0.1811	17.4335	5.57398	0.249816	1.68885	0.30031	13	30.73	223.7	8	1807	0	0	0	1	0	0
210000	辽宁省	地级市	2007	辽阳市	119	辽阳	辽阳2007	辽阳市2007	2.62795	2.35102	2.48568			0	0	0	25.564	0.1771	21.4632	6.00468	0.886978	1.53436	0.371024	18	29.8	223.39	14	5748	0	0	0	1	0	0
210000	辽宁省	地级市	2008	辽阳市	119	辽阳	辽阳2008	辽阳市2008	2.60644	2.76981	2.6869			0	0	0	30.897	0.1746	25.1788	6.24883	1.15696	1.52223	0.461602	9	30.32	224.12	17	3920	0	0	0	1	0	0
210000	辽宁省	地级市	2009	辽阳市	119	辽阳	辽阳2009	辽阳市2009	1.89045	2.57538	2.20678			0	0	0	33.151	0.1673	27.7857	7.88719	1.54561	1.82531	0.580211	16	30.4	223.82	12	4911	0	0	0	1	0	0
210000	辽宁省	地级市	2010	辽阳市	119	辽阳	辽阳2010	辽阳市2010	2.39104	4.31035	3.21257			0	0	0	39.686	0.1661	32.0316	10.3995	1.4615	1.82672	0.7063	18	30.52	224.3	14	4390	0	0	0	1	0	0
210000	辽宁省	地级市	2011	辽阳市	119	辽阳	辽阳2011	辽阳市2011	1.84089	4.54719	2.89758			0	0	0	48.594	0.1763	36.1553	11.2718	1.50273	1.75214	0.8687	15	30.5	224.15	13	5249	0	0	0	1	0	0
210000	辽宁省	地级市	2012	辽阳市	119	辽阳	辽阳2012	辽阳市2012	2.45501	5.3673	3.63506			0	0	0	53.877	0.18	40.2385	11.0161	1.47385	1.84082	1.02984	14	30.5	224.18	8	4452	0	0	1	1	0	0
210000	辽宁省	地级市	2013	辽阳市	119	辽阳	辽阳2013	辽阳市2013	2.75274	8.07609	4.73142			0	0	0	59.999	0.199	43.0425	10.3077	1.26129	1.9475	1.18466	23	30.8	224.54	19	4570	0	0	1	1	0	0
210000	辽宁省	地级市	2014	辽阳市	119	辽阳	辽阳2014	辽阳市2014	6.77954	7.04817	6.9126			0	0	0	54.8	0.18539	46.4444	11.3146	1.32148	2.28631	1.30156	28	35.35	228.77	10	3625	0	0	1	1	0	0
210000	辽宁省	地级市	2015	辽阳市	119	辽阳	辽阳2015	辽阳市2015	6.26701	7.55847	6.88355			0	0	0	55.674	0.17353	50.716	6.58039	0.614172	2.58221	1.41699	26	37.67	230.61	15	4678	0	0	1	1	0	0
210000	辽宁省	地级市	2016	辽阳市	119	辽阳	辽阳2016	辽阳市2016	6.62136	10.0238	8.15392			0	0	0	35.476	0.15775	54.507	10.8189	0.423945	5.14584	1.56767	29	49.02	238	25	6071	0	0	1	1	0	0
210000	辽宁省	地级市	2017	辽阳市	119	辽阳	辽阳2017	辽阳市2017	8.48209	12.058	10.121			0	0	0	41.449	0.16882	60.361	10.5772	0.333195	5.10064	1.76061	38			7	5182	0	0	1	1	0	0
210000	辽宁省	地级市	2018	辽阳市	119	辽阳	辽阳2018	辽阳市2018	8.8927	14.1552	11.2363			0	0	0	47.422	0.16777	67.941	10.2778	0.352647	5.45541	1.96779	41	40.6	231.88	12	5531	0	0	1	1	0	0
210000	辽宁省	地级市	2019	辽阳市	119	辽阳	辽阳2019	辽阳市2019	8.50606	15.626	11.5593			0	0	0	45.498	0.16163	69.094	11.4699	0.312928	6.36486	2.21436	52	42.94	233.23	11	5627	0	0	1	1	0	0
210000	辽宁省	地级市	2020	辽阳市	119	辽阳	辽阳2020	辽阳市2020	7.97713	15.751	11.2454			0	0	0	51.792	0.1753	73.39	11.7177	0.452427	6.44195	2.43931	82	44.51	233.89	15	5889	0	0	1	1	0	0
220000	吉林省	地级市	2006	辽源市	120	辽源	辽源2006	辽源市2006	5.36239	5.33461	5.34849			0	0	0	13.918	0.0952	15.0782	3.69737	0.149618	1.62458	0.30031	4	34.57	218.29	7	3420	0	0	0	1	0	0
220000	吉林省	地级市	2007	辽源市	120	辽源	辽源2007	辽源市2007	7.2828	5.36942	6.2556			0	0	0	17.545	0.0918	17.271	3.86296	0.383193	1.37941	0.371024	6	34.04	219.24	4	3255	0	0	0	1	0	0
220000	吉林省	地级市	2008	辽源市	120	辽源	辽源2008	辽源市2008	3.52802	12.1648	6.59334			0	0	0	21.989	0.0912	18.789	4.30495	0.614088	1.16312	0.461602	3	33.97	221.63	4	3387	0	0	0	1	0	0
220000	吉林省	地级市	2009	辽源市	120	辽源	辽源2009	辽源市2009	2.89063	6.78265	4.43688			0	0	0	27.16	0.0895	22.0129	4.29092	0.560137	1.13871	0.580211	2	33.19	222.69	9	3441	0	0	0	1	0	0
220000	吉林省	地级市	2010	辽源市	120	辽源	辽源2010	辽源市2010	2.6166	9.01145	4.87902			0	0	0	33.137	0.0883	23.9768	4.16009	0.473724	1.04954	0.7063	13	33.39	222.96	7	3341	0	0	0	1	0	0
220000	吉林省	地级市	2011	辽源市	120	辽源	辽源2011	辽源市2011	3.29515	9.13052	5.50495			0	0	0	40.844	0.0908	27.8057	3.76917	0.599775	0.986839	0.8687	4	31.98	222.24	13	4974	0	0	0	1	0	0
220000	吉林省	地级市	2012	辽源市	120	辽源	辽源2012	辽源市2012	3.105	7.84902	4.94997			0	0	0	49.479	0.091	32.3596	3.94413	0.557266	0.923173	1.02984	8	32.14	223.25	10	4073	0	0	0	1	0	0
220000	吉林省	地级市	2013	辽源市	120	辽源	辽源2013	辽源市2013	5.00045	12.0852	7.80337			0	0	0	57.402	0.137	36.5384	3.64243	0.557884	0.926166	1.18466	6	32.55	224.26	21	5219	0	0	0	1	0	0
220000	吉林省	地级市	2014	辽源市	120	辽源	辽源2014	辽源市2014	4.87406	7.04921	5.8645			0	0	0	56.467	0.13021	39.476	3.88537	0.770545	1.05204	1.30156	5	33	224.46	17	3697	0	0	0	1	0	0
220000	吉林省	地级市	2015	辽源市	120	辽源	辽源2015	辽源市2015	2.85013	6.00938	4.14453			0	0	0	59.855	0.12753	43.872	3.86958	0.709664	1.11734	1.41699	13	34.19	225.81	10	4672	0	0	0	1	0	0
220000	吉林省	地级市	2016	辽源市	120	辽源	辽源2016	辽源市2016	2.69751	7.51239	4.51515			0	0	0	63.48	0.1271	46.91	3.16364	0.316311	1.17898	1.56767	12	35.09	227.37	14	5218	0	0	0	1	0	0
220000	吉林省	地级市	2017	辽源市	120	辽源	辽源2017	辽源市2017	3.56972	7.84432	5.30261			0	0	0	58.17	0.13192	50.474	2.78661	0.302351	1.37174	1.76061	13			11	5325	0	0	0	1	0	0
220000	吉林省	地级市	2018	辽源市	120	辽源	辽源2018	辽源市2018	4.76452	9.54305	6.75672			0	0	0	52.861	0.08904	57.948	2.86944	0.280134	1.61061	1.96779	13	45.52	239.72	15	4772	0	0	0	1	0	0
220000	吉林省	地级市	2019	辽源市	120	辽源	辽源2019	辽源市2019	5.92484	10.7607	7.99881			0	0	0	35.108	0.08737	63.708	4.25839	0.199167	2.59342	2.21436	6	60.88	251.26	15	5916	0	0	0	1	0	0
220000	吉林省	地级市	2020	辽源市	120	辽源	辽源2020	辽源市2020	5.75658	12.6277	8.55405			0	0	0	37.171	0.07796	66.603	3.96135	0.142706	2.75642	2.43931	3	60.23	248.6	27	5768	0	0	0	1	0	0
370000	山东省	地级市	2006	聊城市	121	聊城	聊城2006	聊城市2006	4.21736	0.14192	0.769705			0	0	0	15.347	0.345	14.1198	3.99866	0.39214	1.26373	0.90093	18	25.02	208.5	20	8489	0	0	0	1	0	0
370000	山东省	地级市	2007	聊城市	121	聊城	聊城2007	聊城市2007	4.66926	0.16332	0.880044			0	0	0	18.576	0.3329	15.8793	4.13452	1.4847	1.19834	1.11307	28	25.87	210.8	29	7263	0	0	0	1	0	0
370000	山东省	地级市	2008	聊城市	121	聊城	聊城2008	聊城市2008	6.65055	1.07042	2.68403			0	0	0	22.556	0.3511	18.1784	3.90625	1.57498	1.15263	1.38481	35	26.08	211.15	24	7068	0	0	0	1	0	0
370000	山东省	地级市	2009	聊城市	121	聊城	聊城2009	聊城市2009	17.6841	0.60371	3.36524			0	0	0	24.657	0.3504	21.382	4.01751	1.53072	1.33877	1.74063	40	26.94	212.53	19	7903	0	0	0	1	0	0
370000	山东省	地级市	2010	聊城市	121	聊城	聊城2010	聊城市2010	20.1093	0.8651	4.30516			0	0	0	28.464	0.3537	25.7833	4.3456	1.43386	1.3265	2.1189	81	29.38	215.72	15	6966	0	0	0	1	0	0
370000	山东省	地级市	2011	聊城市	121	聊城	聊城2011	聊城市2011	14.6657	0.98326	3.87465			0	0	0	32.968	0.3833	29.7641	5.03084	1.23428	1.25309	2.6061	86	30.66	217.98	24	7653	0	0	0	1	0	0
370000	山东省	地级市	2012	聊城市	121	聊城	聊城2012	聊城市2012	13.6563	1.71776	4.91247			0	0	0	36.573	0.395	33.6905	4.8673	1.47724	1.35923	3.08952	72	32.73	220.72	21	7250	0	0	0	1	0	0
370000	山东省	地级市	2013	聊城市	121	聊城	聊城2013	聊城市2013	12.0848	1.89633	4.83994			0	0	0	39.563	0.484	37.7013	5.72941	1.40942	1.41408	3.55398	141	34.72	222.83	18	6934	0	0	0	1	0	0
370000	山东省	地级市	2014	聊城市	121	聊城	聊城2014	聊城市2014	23.614	1.58745	6.32409			0	0	0	42.482	0.4791	42.2371	6.20706	1.28993	1.56758	3.90469	141	36.05	223.96	10	6203	0	0	0	1	0	0
370000	山东省	地级市	2015	聊城市	121	聊城	聊城2015	聊城市2015	20.9631	1.79412	6.29536			0	0	0	44.743	0.4763	48.07	6.60499	0.570155	1.65849	4.25096	187	37.05	225.17	20	6014	0	0	0	1	0	0
370000	山东省	地级市	2016	聊城市	121	聊城	聊城2016	聊城市2016	23.424	1.99086	7.0321			0	0	0	47.624	0.4729	55.223	6.55776	0.371641	1.78896	4.70303	467	38.7	226.89	14	6107	0	0	0	1	0	0
370000	山东省	地级市	2017	聊城市	121	聊城	聊城2017	聊城市2017	12.6897	3.1101	6.33281			0	0	0	49.806	0.47014	60.034	6.1891	0.48124	1.84985	5.28184	291			25	6714	0	0	0	1	0	0
370000	山东省	地级市	2018	聊城市	121	聊城	聊城2018	聊城市2018	12.5789	5.53191	8.37122			0	0	0	51.935	0.43914	65.436	6.1631	0.348771	1.88265	5.90338	334	41.04	231.16	21	6598	0	0	0	1	0	0
370000	山东省	地级市	2019	聊城市	121	聊城	聊城2019	聊城市2019	15.2259	8.41501	11.3472			0	0	0	37.129	0.41024	70.475	8.70039	0.488928	2.87641	6.64308	250	50.24	236.17	35	7206	0	0	0	1	0	0
370000	山东省	地级市	2020	聊城市	121	聊城	聊城2020	聊城市2020	6.0877	10.6643	8.07004			0	0	0	38.925	0.41202	79.96	8.71695	0.439516	3.1111	7.31793	389	51.27	236.88	12	6116	0	0	0	1	0	0
530000	云南省	地级市	2006	临沧市	122	临沧	临沧2006	临沧市2006	9.31042	59.6274	24.8468			0	0	0	6.1	0.0974	16.2176	4.86364	0.314514	1.62838	0		30.88	195.88	11	6924	0	0	0	1	0	0
530000	云南省	地级市	2007	临沧市	122	临沧	临沧2007	临沧市2007	58.5347	41.0387	49.1869			0	0	0	6.1	0.1094	18.2693	5.12244	0.571251	1.57048	0		30.67	195.88	17	5534	0	0	0	1	0	0
530000	云南省	地级市	2008	临沧市	122	临沧	临沧2008	临沧市2008	62.1214	67.0485	64.5515			0	0	0	6.605	0.1061	20.6936	5.40963	0.347023	1.57303	0	1	30.91	195.88	22	8108	0	0	0	1	0	0
530000	云南省	地级市	2009	临沧市	122	临沧	临沧2009	临沧市2009	4.34422	73.6372	19.8706			0	0	0	7.59	0.0963	24.6356	5.54467	0.255121	1.85564	0	1	32.84	198.01	13	6514	0	0	0	1	0	0
530000	云南省	地级市	2010	临沧市	122	临沧	临沧2010	临沧市2010	19.8824	80.1375	41.8617			0	0	0	8.988	0.1002	26.3903	6.68931	0.355165	1.8813	0	5	31.95	199.01	14	5565	0	0	0	1	0	0
530000	云南省	地级市	2011	临沧市	122	临沧	临沧2011	临沧市2011	36.5039	84.1389	56.672			0	0	0	11.166	0.1187	30.1894	7.85043	0.391868	1.90194	0	4	29.57	197.35	18	7985	0	0	0	1	0	0
530000	云南省	地级市	2012	临沧市	122	临沧	临沧2012	临沧市2012	40.0601	99.9999	65.2392			0	0	0	14.376	0.131	34.7626	8.56257	0.239878	1.74532	0	4	26.85	196.35	14	7141	0	0	1	1	0	0
530000	云南省	地级市	2013	临沧市	122	临沧	临沧2013	临沧市2013	43.6748	119.211	75.1829			0	0	0	17.631	0.15	39.3357	8.85497	0.330675	1.74439	0	12	26.45	195.88	7	5869	0	0	1	1	0	0
530000	云南省	地级市	2014	临沧市	122	临沧	临沧2014	临沧市2014	52.3415	141.66	90.2439			0	0	0	18.71	0.15638	42.1314	8.01021	0.320189	1.76894	0	1	26.58	195.88	51	7308	0	0	1	1	0	0
530000	云南省	地级市	2015	临沧市	122	临沧	临沧2015	临沧市2015	76.783	156.853	112.977			0	0	0	20.077	0.14786	49.045	7.57999	0.323958	1.87735	0	10	37.24	208.31	32	7179	0	0	1	1	0	0
530000	云南省	地级市	2016	临沧市	122	临沧	临沧2016	临沧市2016	98.8223	157.67	121.9			0	0	0	21.906	0.1501	59.626	6.94849	0.254838	1.85186	0	1	38.19	210.11	33	8713	0	0	1	1	0	0
530000	云南省	地级市	2017	临沧市	122	临沧	临沧2017	临沧市2017	31.3123	172.355	100.831			0	0	0	23.942	0.15102	73.92	6.62904	0.253962	1.80517	0	18			23	5753	0	0	1	1	0	0
530000	云南省	地级市	2018	临沧市	122	临沧	临沧2018	临沧市2018	11.6639	172.355	72.0203			0	0	0	24.892	0.1575	79.804	7.01027	0.255739	1.79148	0	27	40.08	212.76	16	6344	0	0	1	1	0	0
530000	云南省	地级市	2019	临沧市	122	临沧	临沧2019	临沧市2019	10.562	172.355	69.2668			0	0	0	29.926	0.14224	88.971	6.12215	0.338916	1.66086	0	9	46.61	219.16	16	5798	0	0	1	1	0	0
530000	云南省	地级市	2020	临沧市	122	临沧	临沧2020	临沧市2020	8.2334	172.355	58.1251			0	0	0	36.213	0.13638	99.755	5.83633	0.565085	1.73934	0	29	45.8	216.34	12	6299	0	0	1	1	0	0
140000	山西省	地级市	2006	临汾市	123	临汾	临汾2006	临汾市2006	49.0222	0.29736	4.24908			0	0	0	14.242	0.358	16.5075	6.78252	0.13047	1.76506	0.30031	13	30.06	224.29	21	7472	0	0	0	1	0	1
140000	山西省	地级市	2007	临汾市	123	临汾	临汾2007	临汾市2007	55.6888	0.68037	6.88987			0	0	0	15.821	0.3603	18.7298	7.16104	0.822315	1.73129	0.371024	9	29.47	223.62	38	5587	0	0	0	1	0	1
140000	山西省	地级市	2008	临汾市	123	临汾	临汾2008	临汾市2008	95.6466	0.6309	9.59531			0	0	0	18.031	0.3554	22.31	7.18511	0.677206	1.70163	0.461602	11	29.56	224.45	28	7879	0	0	0	1	0	1
140000	山西省	地级市	2009	临汾市	123	临汾	临汾2009	临汾市2009	73.3168	0.33898	5.88383			0	0	0	18.215	0.3562	24.2168	8.20489	0.580734	1.99215	0.580211	10	35.38	228.14	25	6760	0	0	0	1	0	1
140000	山西省	地级市	2010	临汾市	123	临汾	临汾2010	临汾市2010	43.9581	0.70802	6.07473			0	0	0	20.851	0.3563	23.0806	8.4749	0.651021	2.10679	0.7063	22	34.18	226.7	38	6548	0	0	0	1	0	1
140000	山西省	地级市	2011	临汾市	123	临汾	临汾2011	临汾市2011	39.5073	0.6297	5.38456			0	0	0	26.22	0.3653	28.5228	7.84339	0.617445	1.86399	0.8687	12	30.38	223.81	34	7483	0	0	0	1	0	1
140000	山西省	地级市	2012	临汾市	123	临汾	临汾2012	临汾市2012	44.4129	1.17217	7.80665			0	0	0	28.031	0.397	32.8258	9.07207	0.654824	1.97075	1.02984	26	31.22	224.58	44	6895	0	0	0	1	0	1
140000	山西省	地级市	2013	临汾市	123	临汾	临汾2013	临汾市2013	40.7476	1.10947	7.22395			0	0	0	28.663	0.389	37.5725	9.6535	0.637778	2.15676	1.18466	38	33.01	225.88	34	5554	0	0	0	1	0	1
140000	山西省	地级市	2014	临汾市	123	临汾	临汾2014	临汾市2014	40.1488	1.23241	7.53588			0	0	0	27.557	0.3795	39.2209	9.74769	0.491803	2.30541	1.30156	35	37.84	230	35	6393	0	0	0	1	0	1
140000	山西省	地级市	2015	临汾市	123	临汾	临汾2015	临汾市2015	20.51	1.90164	6.4016			0	0	0	26.239	0.37175	48.051	7.59458	0.313294	2.61928	1.41699	44	43.64	235.82	38	6508	0	0	0	1	0	1
140000	山西省	地级市	2016	临汾市	123	临汾	临汾2016	临汾市2016	25.9393	3.13065	9.26208			0	0	0	27.102	0.36471	50.482	7.13471	0.301198	2.75326	1.56767	57	45.48	237.52	59	8653	0	0	0	1	0	1
140000	山西省	地级市	2017	临汾市	123	临汾	临汾2017	临汾市2017	7.67239	7.10575	7.38384			0	0	0	29.539	0.36455	56.866	7.35383	0.536426	2.70655	1.76061	42			41	7018	0	0	0	1	0	1
140000	山西省	地级市	2018	临汾市	123	临汾	临汾2018	临汾市2018	5.3649	9.19534	7.03259			0	0	0	32.066	0.36053	63.695	8.75108	0.289954	2.72749	1.96779	100	47.6	241.09	54	9245	0	0	0	1	0	1
140000	山西省	地级市	2019	临汾市	123	临汾	临汾2019	临汾市2019	4.56856	10.2101	6.84868			0	0	0	32.25	0.37099	66.67	9.50188	0.20012	2.97408	2.21436	42	49.6	242.42	37	9732	0	0	0	1	0	1
140000	山西省	地级市	2020	临汾市	123	临汾	临汾2020	临汾市2020	2.65743	10.2907	5.26183			0	0	0	40.344	0.36038	71.121	8.98933	0.196603	3.22766	2.43931	93	49.57	242.06	17	7221	0	0	0	1	0	1
370000	山东省	地级市	2006	临沂市	124	临沂	临沂2006	临沂市2006	4.15276	0.14192	0.769705			0	0	0	14.4	0.5567	15.83	4.14788	0.28003	1.30157	0.90093	27	35.26	222.54	17	4095	0	0	0	1	0	0
370000	山东省	地级市	2007	临沂市	124	临沂	临沂2007	临沂市2007	6.62996	0.14192	0.92585			0	0	0	16.962	0.5425	19.1274	4.1404	1.32018	1.26647	1.11307	49	36.53	224.09	25	5553	0	0	0	1	0	0
370000	山东省	地级市	2008	临沂市	124	临沂	临沂2008	临沂市2008	10.3204	0.8806	3.05386			0	0	0	19.949	0.5439	24.1015	4.09718	1.2928	1.25081	1.38481	54	36.8	224.75	26	6793	0	0	0	1	0	0
370000	山东省	地级市	2009	临沂市	124	临沂	临沂2009	临沂市2009	13.3823	0.59232	2.8749			0	0	0	20.983	0.552	27.6668	4.42251	1.17096	1.47395	1.74063	66	37.39	225.27	16	6435	0	0	0	1	0	0
370000	山东省	地级市	2010	临沂市	124	临沂	临沂2010	临沂市2010	12.3918	0.8111	3.2252			0	0	0	23.886	0.5612	31.724	4.81175	1.38972	1.52222	2.1189	102	38.74	227.74	22	7004	0	0	0	1	0	0
370000	山东省	地级市	2011	临沂市	124	临沂	临沂2011	临沂市2011	16.5998	0.80072	3.73929			0	0	0	27.503	0.6311	37.4456	5.09881	1.06551	1.55009	2.6061	122	40.04	229.97	18	6679	0	0	0	1	0	0
370000	山东省	地级市	2012	临沂市	124	临沂	临沂2012	临沂市2012	18.9163	1.35897	5.20021			0	0	0	29.808	0.722	42.1379	5.64501	1.19715	1.70572	3.08952	101	41.76	232.09	10	7487	0	0	0	1	0	0
370000	山东省	地级市	2013	临沂市	124	临沂	临沂2013	临沂市2013	27.1976	1.35628	6.32845			0	0	0	30.613	1.011	41.897	6.47629	1.17666	1.84644	3.55398	153	43.07	233.61	29	7528	0	0	0	1	0	0
370000	山东省	地级市	2014	临沂市	124	临沂	临沂2014	临沂市2014	25.7789	1.75451	6.96616			0	0	0	35.032	0.94962	49.3108	7.03139	1.01083	2.02186	3.90469	194	44.26	234.71	25	5631	0	0	0	1	0	0
370000	山东省	地级市	2015	临沂市	124	临沂	临沂2015	临沂市2015	27.1514	1.68428	7.02641			0	0	0	36.656	0.93881	56.312	7.54387	0.9057	2.1516	4.25096	232	45.96	236.75	12	5926	0	0	0	1	0	0
370000	山东省	地级市	2016	临沂市	124	临沂	临沂2016	临沂市2016	23.1973	2.15885	7.277			0	0	0	38.803	0.92396	60.039	7.2991	1.26279	2.29555	4.70303	296	47.97	239.06	21	5978	0	0	0	1	0	0
370000	山东省	地级市	2017	临沂市	124	临沂	临沂2017	临沂市2017	13.7833	3.15326	6.65422			0	0	0	41.227	0.8786	63.44	6.58967	0.775256	2.38295	5.28184	417			17	5670	0	0	0	1	0	0
370000	山东省	地级市	2018	临沂市	124	临沂	临沂2018	临沂市2018	12.1288	5.4574	8.16229			0	0	0	44.534	0.81428	67.679	6.60979	0.683415	2.424	5.90338	494	49.16	241.32	12	5335	0	0	0	1	0	0
370000	山东省	地级市	2019	临沂市	124	临沂	临沂2019	临沂市2019	13.629	8.22108	10.6028			0	0	0	43.213	0.71126	76.31	7.17411	0.824007	2.82059	6.64308	359	53.22	244.32	16	5879	0	0	0	1	0	0
370000	山东省	地级市	2020	临沂市	124	临沂	临沂2020	临沂市2020	14.8934	9.17556	11.7097			0	0	0	43.582	0.72134	80.594	7.2806	1.07824	3.15102	7.31793	620	54.28	245.12	32	8288	0	0	0	1	0	0
450000	广西壮族自治区	地级市	2006	柳州市	125	柳州	柳州2006	柳州市2006	36.5927	47.2147	41.6313			0	0	0	17.355	0.3772	23.5406	5.60048	0.221051	1.66365	0	15	33.87	223.3	8	5667	0	0	0	1	0	0
450000	广西壮族自治区	地级市	2007	柳州市	125	柳州	柳州2007	柳州市2007	41.8302	47.3086	44.5025			0	0	0	20.737	0.3386	26.8214	5.34605	1.49347	1.57184	0	24	31.78	221.54	10	5424	0	0	0	1	0	0
450000	广西壮族自治区	地级市	2008	柳州市	125	柳州	柳州2008	柳州市2008	47.8875	77.3548	61.3467			0	0	0	21.181	0.3422	30.5615	5.7631	1.45634	1.55663	0	25	30.13	220.58	31	7995	0	0	0	1	0	0
450000	广西壮族自治区	地级市	2009	柳州市	125	柳州	柳州2009	柳州市2009	38.3223	63.6418	49.749			0	0	0	28.291	0.3534	33.6448	5.87109	1.26055	1.98317	0	26	30.51	221.86	19	6942	0	0	0	1	0	0
450000	广西壮族自治区	地级市	2010	柳州市	125	柳州	柳州2010	柳州市2010	31.9702	50.2154	40.2598			0	0	0	35.23	0.3799	37.2762	5.67385	1.34898	1.92091	0	31	27.82	219.5	18	7163	0	0	0	1	0	0
450000	广西壮族自治区	地级市	2011	柳州市	125	柳州	柳州2011	柳州市2011	24.6678	41.9843	32.3567			0	0	0	41.832	0.4313	38.2266	5.6627	1.17105	1.78613	0	51	27.86	219.26	17	7779	0	0	0	1	0	0
450000	广西壮族自治区	地级市	2012	柳州市	125	柳州	柳州2012	柳州市2012	33.2271	47.7658	39.9613			0	0	0	47.795	0.486	38.8864	6.23695	1.44446	1.80207	0	46	28.88	220.78	18	8524	0	0	0	1	0	0
450000	广西壮族自治区	地级市	2013	柳州市	125	柳州	柳州2013	柳州市2013	28.8248	38.9432	33.5643			0	0	0	54.034	0.607	46.706	6.22476	1.70976	1.96926	0	75	28.65	220.73	17	8795	0	0	0	1	0	0
450000	广西壮族自治区	地级市	2014	柳州市	125	柳州	柳州2014	柳州市2014	32.3893	53.0984	41.7176			0	0	0	57.049	0.60564	51.7206	6.02927	1.59286	1.95785	0	130	33.45	226.32	18	8852	0	0	0	1	0	0
450000	广西壮族自治区	地级市	2015	柳州市	125	柳州	柳州2015	柳州市2015	40.5045	65.539	51.8778			0	0	0	58.869	0.61654	54.223	6.38108	1.16373	2.10526	0	159	36.11	228.78	29	8726	0	0	0	1	0	0
450000	广西壮族自治区	地级市	2016	柳州市	125	柳州	柳州2016	柳州市2016	26.9548	70.6543	44.7031			0	0	0	62.855	0.5847	60.228	6.42584	1.22209	2.25239	0	235	37.75	230.48	22	6608	0	0	0	1	0	0
450000	广西壮族自治区	地级市	2017	柳州市	125	柳州	柳州2017	柳州市2017	23.0531	72.5446	42.2409			0	0	0	69.249	0.60009	64.958	6.52459	1.10347	2.23543	0	150			34	6041	0	0	1	1	0	0
450000	广西壮族自治区	地级市	2018	柳州市	125	柳州	柳州2018	柳州市2018	20.3724	64.4966	37.3245			0	0	0	75.945	0.58417	72.014	6.34591	0.91341	2.20157	0	235	40.93	234.54	28	6291	0	0	1	1	0	0
450000	广西壮族自治区	地级市	2019	柳州市	125	柳州	柳州2019	柳州市2019	19.5298	52.2412	32.5462			0	0	0	77.056	0.62597	77.035	7.07957	1.13058	2.27287	0	190	43.25	236.11	19	5302	0	0	1	1	0	0
450000	广西壮族自治区	地级市	2020	柳州市	125	柳州	柳州2020	柳州市2020	21.3563	52.3111	33.9687			0	0	0	77.148	0.59164	86.155	5.44928	0.913009	2.54639	0	222	45.48	238.21	13	5708	0	0	1	1	0	0
340000	安徽省	地级市	2006	六安市	126	六安	六安2006	六安市2006	6.41802	1.98076	3.57673			0	0	0	6.1	0.2178	13.2507	4.19736	0.187114	1.64555	0.30031	7	40.03	213.88	9	5372	0	0	0	1	0	0
340000	安徽省	地级市	2007	六安市	126	六安	六安2007	六安市2007	6.19616	2.09604	3.61354			0	0	0	7.216	0.2199	17.4006	4.66682	0.398318	1.58682	0.371024	8	39.02	215.54	10	4797	0	0	0	1	0	0
340000	安徽省	地级市	2008	六安市	126	六安	六安2008	六安市2008	18.3442	2.15421	6.41151			0	0	0	7.473	0.2177	20.8384	4.8749	0.399195	1.52314	0.461602	2	37.22	212.99	17	5451	0	0	0	1	0	0
340000	安徽省	地级市	2009	六安市	126	六安	六安2009	六安市2009	20.1301	1.23497	5.13012			0	0	0	9.637	0.2184	24.0001	5.66346	1.21614	1.81146	0.580211	10	35.6	211.88	16	5938	0	0	0	1	0	0
340000	安徽省	地级市	2010	六安市	126	六安	六安2010	六安市2010	18.6898	1.38174	5.20912			0	0	0	12.047	0.2217	27.0844	6.3156	0.571787	1.96524	0.7063	23	34.18	210.62	12	6276	0	0	0	1	0	0
340000	安徽省	地级市	2011	六安市	126	六安	六安2011	六安市2011	20.8817	1.25936	5.2829			0	0	0	14.586	0.72	27.4895	6.91288	0.675816	1.98957	0.8687	64	32.49	210.31	20	6331	0	0	0	1	0	0
340000	安徽省	地级市	2012	六安市	126	六安	六安2012	六安市2012	28.6184	1.1514	6.01012			0	0	0	16.248	0.727	36.9133	7.54387	0.971158	2.12773	1.02984	63	32.24	210.59	17	5454	0	0	0	1	0	0
340000	安徽省	地级市	2013	六安市	126	六安	六安2013	六安市2013	26.4842	1.64375	6.84905			0	0	0	14.089	0.73	40.279	8.10067	0.926993	2.32378	1.18466	128	32.39	212.1	15	4412	0	0	0	1	0	0
340000	安徽省	地级市	2014	六安市	126	六安	六安2014	六安市2014	42.5965	1.80148	9.37212			0	0	0	19.211	0.23176	42.9157	8.65502	0.980209	2.43995	1.30156	134	32.89	213.25	17	6420	0	0	0	1	0	0
340000	安徽省	地级市	2015	六安市	126	六安	六安2015	六安市2015	25.286	2.84535	8.72091			0	0	0	21.524	1.08869	51.354	10.1658	0.900733	2.99219	1.41699	255	36.17	218.42	23	6008	0	0	0	1	0	0
340000	安徽省	地级市	2016	六安市	126	六安	六安2016	六安市2016	27.9992	4.10343	11.0055			0	0	0	23.298	1.09049	59.107	8.86717	1.33174	2.94798	1.56767	231	37.39	219.05	28	6924	0	0	0	1	0	0
340000	安徽省	地级市	2017	六安市	126	六安	六安2017	六安市2017	13.9438	5.77176	9.0104			0	0	0	24.406	1.17941	65.07	9.65588	2.48381	3.39545	1.76061	182			16	5973	0	0	1	1	0	0
340000	安徽省	地级市	2018	六安市	126	六安	六安2018	六安市2018	13.185	6.92419	9.57841			0	0	0	26.731	1.292	77.499	9.50381	2.59858	3.51511	1.96779	343	44.12	228.85	39	6861	0	0	1	1	0	0
340000	安徽省	地级市	2019	六安市	126	六安	六安2019	六安市2019	14.574	6.98683	10.1252			0	0	0	33.37	1.3138	78.842	7.78947	2.43045	3.17549	2.21436	159	50.47	237.09	15	6219	0	0	1	1	0	0
340000	安徽省	地级市	2020	六安市	126	六安	六安2020	六安市2020	13.3688	8.31056	10.556			0	0	0	37.899	0.24776	88.247	7.95692	1.64174	3.46647	2.43931	317	49.34	235.03	26	6467	0	0	1	1	0	0
520000	贵州省	地级市	2006	六盘水市	127	六盘	六盘2006	六盘水市2006	10.6257	23.6489	15.9517			0	0	0	8.363	0.1799	19.0263	6.63715	0.132944	1.55388	0		33.07	225.03	15	6663	0	0	0	1	0	1
520000	贵州省	地级市	2007	六盘水市	127	六盘	六盘2007	六盘水市2007	9.1866	31.9141	17.4114			0	0	0	9.844	0.1877	22.5203	7.18198	0.722401	1.56452	0	2	34.27	227.05	18	6514	0	0	0	1	0	1
520000	贵州省	地级市	2008	六盘水市	127	六盘	六盘2008	六盘水市2008	19.6838	33.3704	25.7397			0	0	0	12.944	0.1794	25.7951	7.73248	0.682459	1.47262	0	2	30.78	224.61	19	6615	0	0	0	1	0	1
520000	贵州省	地级市	2009	六盘水市	127	六盘	六盘2009	六盘水市2009	12.8414	30.7522	20.0583			0	0	0	14.422	0.1878	27.9313	8.63036	0.646257	1.70241	0	5	33.1	226.96	16	6255	0	0	0	1	0	1
520000	贵州省	地级市	2010	六盘水市	127	六盘	六盘2010	六盘水市2010	19.8732	30.2117	24.5666			0	0	0	17.972	0.1961	33.983	9.84921	0.556536	1.7228	0	6	33.6	227.78	10	6690	0	0	0	1	0	1
520000	贵州省	地级市	2011	六盘水市	127	六盘	六盘2011	六盘水市2011	21.33	24.6928	22.9567			0	0	0	21.522	0.2218	39.8731	11.5394	0.535736	1.61926	0	7	32.11	226.89	13	6871	0	0	0	1	0	1
520000	贵州省	地级市	2012	六盘水市	127	六盘	六盘2012	六盘水市2012	22.0309	37.9778	29.0746			0	0	0	25.877	0.243	43.8155	14.0113	0.525777	1.60372	0	14	33.01	227.15	18	7133	0	0	0	1	0	1
520000	贵州省	地级市	2013	六盘水市	127	六盘	六盘2013	六盘水市2013	20.371	25.8	22.943			0	0	0	27.142	0.25	46.616	14.0107	0.553463	1.53529	0	27	36.31	229.73	24	5497	0	0	0	1	0	1
520000	贵州省	地级市	2014	六盘水市	127	六盘	六盘2014	六盘水市2014	28.1844	34.3529	31.1387			0	0	0	36.228	0.24505	53.0154	12.3466	0.599482	1.45607	0	26	38.35	231.07	19	6467	0	0	0	1	0	1
520000	贵州省	地级市	2015	六盘水市	127	六盘	六盘2015	六盘水市2015	31.9201	47.6324	39.1359			0	0	0	41.618	0.24094	57.597	10.8456	1.2866	1.46246	0	38	39.33	229.78	29	6666	0	0	0	1	0	1
520000	贵州省	地级市	2016	六盘水市	127	六盘	六盘2016	六盘水市2016	21.0167	44.3971	30.8619			0	0	0	45.325	0.23038	65.015	10.1763	1.72058	1.6315	0	48	40.21	230.66	31	6605	0	0	0	1	0	1
520000	贵州省	地级市	2017	六盘水市	127	六盘	六盘2017	六盘水市2017	4.69778	48.0436	15.8916			0	0	0	50.136	0.24095	77.366	9.48347	2.10303	1.65767	0	49			46	6762	0	0	0	1	0	1
520000	贵州省	地级市	2018	六盘水市	127	六盘	六盘2018	六盘水市2018	8.70833	43.9372	20.2169			0	0	0	52.059	0.24037	84.143	9.28928	1.89832	1.64137	0	67	41.67	231.97	57	9061	0	0	0	1	0	1
520000	贵州省	地级市	2019	六盘水市	127	六盘	六盘2019	六盘水市2019	8.5431	45.6542	20.4706			0	0	0	43.003	0.2523	86.65	8.43691	1.71496	2.16256	0	68	41.77	229.55	21	6503	0	0	0	1	0	1
520000	贵州省	地级市	2020	六盘水市	127	六盘	六盘2020	六盘水市2020	2.50879	53.4338	12.5712			0	0	0	44.224	0.25701	89.001	8.13063	1.9413	2.23977	0	109	42.46	229.7	10	7617	0	0	0	1	0	1
350000	福建省	地级市	2006	龙岩市	128	龙岩	龙岩2006	龙岩市2006	3.93775	47.1437	14.456	2018	-12	1	0	0	16.394	0.2291	17.8621	6.33098	0.399001	1.38002	0	14	33.05	213.71	9	6771	0	0	0	1	0	0
350000	福建省	地级市	2007	龙岩市	128	龙岩	龙岩2007	龙岩市2007	6.00104	34.2973	14.7619	2018	-11	1	0	0	20.088	0.2491	20.5713	6.62339	1.06132	1.36262	0	19	32.1	214.53	17	6406	0	0	0	1	0	0
350000	福建省	地级市	2008	龙岩市	128	龙岩	龙岩2008	龙岩市2008	5.9439	43.2405	16.7219	2018	-10	1	0	0	24.334	0.2627	24.0533	6.87838	1.63614	1.36431	0	13	31.25	214.32	19	5571	0	0	0	1	0	0
350000	福建省	地级市	2009	龙岩市	128	龙岩	龙岩2009	龙岩市2009	5.27385	27.0335	12.1909	2018	-9	1	0	0	29.725	0.2805	27.6429	6.58735	1.54366	1.53373	0	16	35.87	221.93	13	6257	0	0	0	1	0	0
350000	福建省	地级市	2010	龙岩市	128	龙岩	龙岩2010	龙岩市2010	5.30599	40.2688	15.2186	2018	-8	1	0	0	38.698	0.3055	30.8345	6.73613	1.33973	1.52201	0	64	33.74	220.73	16	6237	0	0	0	1	0	0
350000	福建省	地级市	2011	龙岩市	128	龙岩	龙岩2011	龙岩市2011	3.8462	20.901	9.11855	2018	-7	1	0	0	48.554	0.344	35.5522	6.78524	1.36055	1.43539	0	70	31.15	218.81	20	7049	0	0	0	1	0	0
350000	福建省	地级市	2012	龙岩市	128	龙岩	龙岩2012	龙岩市2012	4.28208	35.8765	12.8752	2018	-6	1	0	0	53.59	0.345	41.1735	7.38427	1.62196	1.55161	0	82	31.16	219.38	24	6557	0	0	0	1	0	0
350000	福建省	地级市	2013	龙岩市	128	龙岩	龙岩2013	龙岩市2013	4.9442	32.7362	13.1123	2018	5	1	0	0	48.842	0.345	44.7753	7.91991	1.75748	1.44126	0	146	34.19	222.17	16	3913	0	0	0	1	0	0
350000	福建省	地级市	2014	龙岩市	128	龙岩	龙岩2014	龙岩市2014	5.54487	38.9152	15.2457	2018	4	1	0	0	62.716	0.30353	44.5738	7.39215	2.3489	1.64601	0	142	34.37	222.79	18	5027	0	0	0	1	0	0
350000	福建省	地级市	2015	龙岩市	128	龙岩	龙岩2015	龙岩市2015	6.13528	52.8497	19.0547	2018	3	1	0	0	66.863	0.30561	55.43	7.16765	2.24394	1.68167	0	198	35.84	224.3	14	4778	0	0	0	1	0	0
350000	福建省	地级市	2016	龙岩市	128	龙岩	龙岩2016	龙岩市2016	8.26171	75.7065	27.1737	2018	6	1	0	0	72.354	0.31361	59.329	6.93236	2.03295	1.68171	0	352	37.2	225.41	27	5716	0	0	0	1	0	0
350000	福建省	地级市	2017	龙岩市	128	龙岩	龙岩2017	龙岩市2017	4.06314	65.6077	17.9055	2018	-1	1	0	0	81.504	0.31622	64.211	6.4701	2.8157	1.62582	0	313			17	5261	0	0	0	1	0	0
350000	福建省	地级市	2018	龙岩市	128	龙岩	龙岩2018	龙岩市2018	5.47464	54.8815	18.4691	2018	0	1	1	1	90.655	0.33498	70.094	6.32071	2.97844	1.5572	0	501	41.86	231.66	20	5725	0	0	0	1	0	0
350000	福建省	地级市	2019	龙岩市	128	龙岩	龙岩2019	龙岩市2019	5.75313	57.6917	19.4739	2018	1	1	1	1	101.476	0.30425	78.85	5.80885	4.1542	1.57492	0	305	43.77	232.99	10	6006	0	0	0	1	0	0
350000	福建省	地级市	2020	龙岩市	128	龙岩	龙岩2020	龙岩市2020	5.75227	50.3694	17.9739	2018	2	1	1	1	105.548	0.31592	82.97	5.52464	2.64716	1.65578	0	688	44.86	233.71	21	6378	0	0	0	1	0	0
620000	甘肃省	地级市	2006	陇南市	129	陇南	陇南2006	陇南市2006	11.5998	35.7754	20.7016			0	0	0	6.1	0.1064	14.6859	4.16323	0.263554	2.01105	0.30031		36.63	208.6	9	6508	0	0	0	0	0	0
620000	甘肃省	地级市	2007	陇南市	129	陇南	陇南2007	陇南市2007	10.2474	34.6396	19.1738			0	0	0	6.1	0.1092	17.3091	5.15929	0.617814	2.06256	0.371024	3	35.74	208.1	22	8100	0	0	0	0	0	0
620000	甘肃省	地级市	2008	陇南市	129	陇南	陇南2008	陇南市2008	11.657	34.0866	20.2198			0	0	0	6.1	0.1111	19.9487	6.30932	0.23216	3.20523	0.461602		44.32	215.04	15	7230	0	0	0	0	0	0
620000	甘肃省	地级市	2009	陇南市	129	陇南	陇南2009	陇南市2009	12.3736	43.2138	23.6519			0	0	0	6.1	0.113	23.3644	5.58079	0.229623	3.44555	0.580211	2	47.83	220.91	6	5268	0	0	0	0	0	0
620000	甘肃省	地级市	2010	陇南市	129	陇南	陇南2010	陇南市2010	12.1114	41.2763	22.8329			0	0	0	6.457	0.1127	25.876	5.5087	0.163751	3.36524	0.7063	1	45.1	218.83	7	4331	0	0	0	0	0	0
620000	甘肃省	地级市	2011	陇南市	129	陇南	陇南2011	陇南市2011	7.82944	34.6668	16.8643			0	0	0	6.457	0.1137	29.4267	6.60626	0.189685	3.09871	0.8687	1	43.8	218.24	13	9333	0	0	0	0	0	0
620000	甘肃省	地级市	2012	陇南市	129	陇南	陇南2012	陇南市2012	3.20177	17.9707	7.69911			0	0	0	8.809	0.116	33.4375	7.08501	0.281822	3.18833	1.02984	1	44.04	218.66	13	8262	0	0	0	0	0	0
620000	甘肃省	地级市	2013	陇南市	129	陇南	陇南2013	陇南市2013	2.72876	42.1717	11.3743			0	0	0	8.816	0.164	37.4483	16.883	0.286055	3.51074	1.18466	2	45.65	220.95	6	6250	0	0	0	0	0	0
620000	甘肃省	地级市	2014	陇南市	129	陇南	陇南2014	陇南市2014	10.5224	41.7848	21.5033			0	0	0	10.171	0.1658	39.3834	16.883	0.344856	3.81697	1.30156	3	48.35	223.14	23	7214	0	0	0	0	0	0
620000	甘肃省	地级市	2015	陇南市	129	陇南	陇南2015	陇南市2015	11.307	42.8233	22.5512			0	0	0	12.172	0.1632	46.132	16.3403	0.296245	3.81303	1.41699	2	54.55	232.24	21	5872	0	0	0	0	0	0
620000	甘肃省	地级市	2016	陇南市	129	陇南	陇南2016	陇南市2016	10.3709	41.0228	21.1409			0	0	0	13.805	0.1991	52.205	16.363	0.294899	3.94558	1.56767	5	56.7	234.97	18	7017	0	0	0	0	0	0
620000	甘肃省	地级市	2017	陇南市	129	陇南	陇南2017	陇南市2017	1.60999	58.4068	10.7482			0	0	0	13.113	0.18109	54.566	7.63563	0.356498	4.18683	1.76061	10			28	6666	0	0	0	0	0	0
620000	甘肃省	地级市	2018	陇南市	129	陇南	陇南2018	陇南市2018	2.6778	60.145	13.9425			0	0	0	14.426	0.163	58.781	15.8004	0.376315	4.08945	1.96779	20	61.6	242.87	42	8799	0	0	0	0	0	0
620000	甘肃省	地级市	2019	陇南市	129	陇南	陇南2019	陇南市2019	6.34992	65.2483	21.9641			0	0	0	16.868	0.13257	63.033	5.30533	0.356228	3.76117	2.21436	3	58.3	240.61	36	8090	0	0	0	0	0	0
620000	甘肃省	地级市	2020	陇南市	129	陇南	陇南2020	陇南市2020	2.58924	64.1063	14.2817			0	0	0	18.71	0.14261	69.164	5.1337	0.316678	3.96877	2.43931	13	58.98	240.76	36	7962	0	0	0	0	0	0
430000	湖南省	地级市	2006	娄底市	130	娄底	娄底2006	娄底市2006	13.1426	43.8043	24.5183			0	0	0	9.33	0.2236	16.324	4.26678	0.244712	1.42884	0	8	34.41	216.8	0	0	0	0	0	1	0	0
430000	湖南省	地级市	2007	娄底市	130	娄底	娄底2007	娄底市2007	12.4124	40.8076	22.9573			0	0	0	11.493	0.2297	27.0749	4.49921	0.224475	1.22009	0	21	34.36	219.16	0	0	0	0	0	1	0	0
430000	湖南省	地级市	2008	娄底市	130	娄底	娄底2008	娄底市2008	15.9337	51.1165	29.2289			0	0	0	13.509	0.2321	19.3947	4.22648	0.192049	1.38439	0	21	31.4	213.17	18	4495	0	0	0	1	0	0
430000	湖南省	地级市	2009	娄底市	130	娄底	娄底2009	娄底市2009	15.2303	45.0138	26.6837			0	0	0	14.454	0.2406	18.7779	4.94588	0.413747	1.62274	0	28	32.96	216.76	13	6371	0	0	0	1	0	0
430000	湖南省	地级市	2010	娄底市	130	娄底	娄底2010	娄底市2010	14.6932	46.9459	26.8453			0	0	0	17.569	0.2677	18.6039	4.42134	0.839433	1.55453	0	31	31.54	216.84	19	6161	0	0	0	1	0	0
430000	湖南省	地级市	2011	娄底市	130	娄底	娄底2011	娄底市2011	10.9754	38.8187	21.0719			0	0	0	22.362	0.2875	31.0677	4.6696	0.658006	1.44568	0	46	29.4	213.83	21	6752	0	0	0	1	0	0
430000	湖南省	地级市	2012	娄底市	130	娄底	娄底2012	娄底市2012	5.37415	56.1135	18.5527			0	0	0	26.367	0.29	34.9142	5.16891	0.501623	1.42973	0	49	29.99	215.04	17	7692	0	0	0	1	0	0
430000	湖南省	地级市	2013	娄底市	130	娄底	娄底2013	娄底市2013	9.61717	44.1263	21.2388			0	0	0	25.471	0.304	39.4226	5.58122	0.755223	1.46537	0	58	31.39	216.85	10	7215	0	0	0	1	0	0
430000	湖南省	地级市	2014	娄底市	130	娄底	娄底2014	娄底市2014	9.41986	51.8235	23.031			0	0	0	31.509	0.3031	41.2962	4.86533	0.462839	1.51154	0	77	32.03	217.56	10	5466	0	0	0	1	0	0
430000	湖南省	地级市	2015	娄底市	130	娄底	娄底2015	娄底市2015	11.3527	56.1479	26.308			0	0	0	33.444	0.29119	43.986	4.63912	0.467549	1.5955	0	77	35.02	220.37	9	6599	0	0	0	1	0	0
430000	湖南省	地级市	2016	娄底市	130	娄底	娄底2016	娄底市2016	11.3796	59.685	27.2831			0	0	0	36.058	0.29733	48.53	4.87431	0.323898	1.66797	0	76	36.98	222.28	13	5879	0	0	0	1	0	0
430000	湖南省	地级市	2017	娄底市	130	娄底	娄底2017	娄底市2017	8.22907	56.555	22.7443			0	0	0	36.145	0.29306	53.301	4.97864	0.429462	1.84615	0	86			9	5403	0	0	0	1	0	0
430000	湖南省	地级市	2018	娄底市	130	娄底	娄底2018	娄底市2018	7.00555	48.3991	19.2723			0	0	0	39.249	0.28704	63.427	4.56375	0.844484	1.88215	0	126	44.81	234.95	6	4977	0	0	0	1	0	0
430000	湖南省	地级市	2019	娄底市	130	娄底	娄底2019	娄底市2019	8.11255	50.0575	21.0513			0	0	0	41.675	0.29882	64.347	4.67396	1.15045	1.90976	0	74	50.79	240.1	11	5317	0	0	0	1	0	0
430000	湖南省	地级市	2020	娄底市	130	娄底	娄底2020	娄底市2020	8.49634	56.3657	23.0402			0	0	0	43.913	0.31073	69.412	4.79834	1.57858	2.10686	0	103	49.4	237.48	12	5907	0	0	0	1	0	0
510000	四川省	地级市	2006	泸州市	131	泸州	泸州2006	泸州市2006	116.825	43.9749	74.4984			0	0	0	7.819	0.2374	15.4055	4.22983	0.180293	1.61433	0.90093	2	35.37	212.48	16	7135	0	0	0	1	0	0
510000	四川省	地级市	2007	泸州市	131	泸州	泸州2007	泸州市2007	207.35	10.5293	83.5307			0	0	0	9.474	0.2554	18.3323	4.77607	0.368435	1.53115	1.11307	4	33.04	210.57	11	6159	0	0	0	1	0	0
510000	四川省	地级市	2008	泸州市	131	泸州	泸州2008	泸州市2008	207.35	17.3243	91.7756			0	0	0	11.831	0.2628	21.5125	4.83962	0.450468	1.46581	1.38481	7	30.57	209.76	18	5933	0	0	0	1	0	0
510000	四川省	地级市	2009	泸州市	131	泸州	泸州2009	泸州市2009	207.35	16.78	86.5626			0	0	0	13.591	0.2671	23.3158	5.4657	0.495847	1.67339	1.74063	5	31.28	214.14	12	4722	0	0	0	1	0	0
510000	四川省	地级市	2010	泸州市	131	泸州	泸州2010	泸州市2010	207.35	18.8843	87.2497			0	0	0	16.698	0.2573	25.6497	6.65756	0.51613	1.72626	2.1189	8	28.3	213.08	18	5739	0	0	0	1	0	0
510000	四川省	地级市	2011	泸州市	131	泸州	泸州2011	泸州市2011	207.35	21.7183	88.2552			0	0	0	21.339	0.265	30.7325	7.2602	0.413663	1.67431	2.6061	12	25.74	211.22	22	6978	0	0	0	1	0	0
510000	四川省	地级市	2012	泸州市	131	泸州	泸州2012	泸州市2012	207.35	21.3805	93.8352			0	0	0	24.317	0.278	35.4074	8.03415	0.44091	1.78778	3.08952	18	25.51	211.59	9	5758	0	0	0	1	0	0
510000	四川省	地级市	2013	泸州市	131	泸州	泸州2013	泸州市2013	207.35	25.8194	99.3713			0	0	0	22.45	0.359	43.1054	9.6101	0.964639	1.9081	3.55398	36	26.35	212.71	12	5348	0	0	0	1	0	0
510000	四川省	地级市	2014	泸州市	131	泸州	泸州2014	泸州市2014	207.35	30.3301	108.975			0	0	0	29.655	0.3702	47.31	9.20209	0.90487	2.01135	3.90469	35	27.06	214.37	11	5405	0	0	0	1	0	0
510000	四川省	地级市	2015	泸州市	131	泸州	泸州2015	泸州市2015	207.35	31.4259	121.287			0	0	0	31.714	0.3795	52.051	9.47717	1.15784	2.16319	4.25096	44	27.99	215.59	5	5297	0	0	0	1	0	0
510000	四川省	地级市	2016	泸州市	131	泸州	泸州2016	泸州市2016	207.35	35.2215	121.9			0	0	0	34.497	0.38432	56.048	9.35706	1.12348	2.33541	4.70303	92	28.89	216.89	4	4362	0	0	0	1	0	0
510000	四川省	地级市	2017	泸州市	131	泸州	泸州2017	泸州市2017	207.35	51.724	121.9			0	0	0	37.02	0.2971	65.725	9.14945	0.848986	2.44986	5.28184	140			4	4496	0	0	0	1	0	0
510000	四川省	地级市	2018	泸州市	131	泸州	泸州2018	泸州市2018	207.35	58.4782	121.9			0	0	0	39.23	0.36916	72.722	8.85505	0.736229	2.5658	5.90338	193	36.66	225.4	11	5124	0	0	0	1	0	0
510000	四川省	地级市	2019	泸州市	131	泸州	泸州2019	泸州市2019	207.35	57.8666	121.9			0	0	0	48.105	0.43184	76.607	7.67139	1.17111	2.30846	6.64308	130	40.48	230.07	21	5218	0	0	0	1	0	0
510000	四川省	地级市	2020	泸州市	131	泸州	泸州2020	泸州市2020	175.745	78.5989	121.9			0	0	0	50.758	1.38657	68.716	7.88447	0.976412	2.53813	7.31793	92	40.01	228.14	12	5065	0	0	0	1	0	0
410000	河南省	地级市	2017	洛阳市	132	洛阳	洛阳2017	洛阳市2017	9.22965	4.71135	6.60653	2010	7	1	1	1	62.982	0.73039	57.863	7.59715	2.46721	2.04953	7.04245	455			16	6599	0	1	0	1	0	0
410000	河南省	地级市	2006	洛阳市	132	洛阳	洛阳2006	洛阳市2006	22.2583	4.21247	9.8547	2010	4	1	0	0	20.241	0.5202	16.3742	5.7451	0.118459	1.20483	1.20124	43	30.18	220.43	13	5602	0	0	0	1	0	0
410000	河南省	地级市	2007	洛阳市	132	洛阳	洛阳2007	洛阳市2007	16.6612	3.74469	7.98944	2010	3	1	0	0	25.12	0.519	19.5172	6.27926	1.62519	1.11558	1.4841	52	30.17	221.12	14	6947	0	0	0	1	0	0
410000	河南省	地级市	2008	洛阳市	132	洛阳	洛阳2008	洛阳市2008	17.3883	9.5542	12.926	2010	6	1	0	0	30.084	0.5201	22.8815	6.07228	1.80455	1.07235	1.84641	67	30.19	221.46	22	7208	0	0	0	1	0	0
410000	河南省	地级市	2009	洛阳市	132	洛阳	洛阳2009	洛阳市2009	17.4725	4.08134	8.5426	2010	-1	1	0	0	31.17	0.5236	26.1518	6.01007	1.79347	1.29243	2.32084	88	33.01	224.33	15	7374	0	0	0	1	0	0
410000	河南省	地级市	2010	洛阳市	132	洛阳	洛阳2010	洛阳市2010	13.6023	3.93141	7.36557	2010	0	1	1	1	35.762	0.5392	29.9081	6.12104	1.43419	1.38346	2.8252	141	31.74	223.67	18	7599	0	0	0	1	0	0
410000	河南省	地级市	2011	洛阳市	132	洛阳	洛阳2011	洛阳市2011	17.4965	3.75729	8.20973	2010	1	1	1	1	41.198	0.5996	33.4718	6.59599	2.00822	1.40419	3.4748	208	31.17	223.63	10	7462	0	0	0	1	0	0
410000	河南省	地级市	2012	洛阳市	132	洛阳	洛阳2012	洛阳市2012	13.5576	5.02437	8.29578	2010	2	1	1	1	45.316	0.611	42.3973	6.88545	2.001	1.52553	4.11936	287	32.51	225	6	6317	0	0	0	1	0	0
410000	河南省	地级市	2013	洛阳市	132	洛阳	洛阳2013	洛阳市2013	9.80504	3.57231	5.94097	2010	-3	1	1	1	45.387	0.728	40.4699	7.45195	2.01609	1.69267	4.73864	368	34.34	226.42	14	5548	0	0	0	1	0	0
410000	河南省	地级市	2014	洛阳市	132	洛阳	洛阳2014	洛阳市2014	10.0627	2.58643	5.13271	2010	-4	1	1	1	49.417	0.7269	44.4842	7.92364	2.05141	1.84028	5.20625	417	41.87	234.81	26	6985	0	0	0	1	0	0
410000	河南省	地级市	2015	洛阳市	132	洛阳	洛阳2015	洛阳市2015	11.1646	2.96508	5.79117	2010	-5	1	1	1	51.692	0.74776	46.515	8.26424	1.86054	1.96558	5.66795	465	44.32	237.49	27	7384	0	0	0	1	0	0
410000	河南省	地级市	2016	洛阳市	132	洛阳	洛阳2016	洛阳市2016	11.1274	2.97873	5.79436	2010	-2	1	1	1	56.41	0.75388	51.295	7.92272	1.80508	2.09268	6.2707	431	46.98	240.85	27	6928	0	1	0	1	0	0
410000	河南省	地级市	2018	洛阳市	132	洛阳	洛阳2018	洛阳市2018	9.91044	7.22969	8.469	2010	8	1	1	1	67.707	0.68367	65.974	7.38368	3.18212	2.13252	7.87117	800	50.34	245.23	30	7676	0	1	0	1	0	0
410000	河南省	地级市	2019	洛阳市	132	洛阳	洛阳2019	洛阳市2019	12.0562	8.96	10.3993	2010	9	1	1	1	72.912	0.68327	75.283	7.34426	4.01232	2.18473	8.85744	555	48.84	243.97	24	8514	0	1	0	1	0	0
410000	河南省	地级市	2020	洛阳市	132	洛阳	洛阳2020	洛阳市2020	7.3467	10.5652	8.8165	2010	10	1	1	1	72.872	0.69732	77	7.4861	3.94132	2.32775	9.75724	621	49.96	245.01	6	3945	0	1	0	1	0	0
410000	河南省	地级市	2006	漯河市	133	漯河	漯河2006	漯河市2006	12.8452	4.09747	7.29865			0	0	0	14.422	0.215	13.1222	4.24387	0.261119	1.18764	0.30031	7	19.39	202.71	7	6491	0	0	0	1	0	0
410000	河南省	地级市	2007	漯河市	133	漯河	漯河2007	漯河市2007	11.3972	3.52935	6.37763			0	0	0	17.601	0.215	14.2965	4.1597	0.739685	1.07205	0.371024	8	19.39	205.79	11	5823	0	0	0	1	0	0
410000	河南省	地级市	2008	漯河市	133	漯河	漯河2008	漯河市2008	12.8965	8.75586	10.6368			0	0	0	22.237	0.2148	16.408	3.49002	1.0051	0.899003	0.461602	3	18.23	202.83	9	4541	0	0	0	1	0	0
410000	河南省	地级市	2009	漯河市	133	漯河	漯河2009	漯河市2009	11.5271	3.93267	6.76625			0	0	0	23.777	0.2183	18.912	3.45037	0.682797	1.0159	0.580211	9	18.23	204.52	15	5263	0	0	0	1	0	0
410000	河南省	地级市	2010	漯河市	133	漯河	漯河2010	漯河市2010	11.5508	3.59606	6.48109			0	0	0	26.974	0.2309	21.1083	3.83985	0.641739	1.06254	0.7063	11	18.23	204.8	8	5038	0	0	0	1	0	0
410000	河南省	地级市	2011	漯河市	133	漯河	漯河2011	漯河市2011	10.8236	3.63843	6.30522			0	0	0	29.487	0.2458	25.5355	4.48179	0.651233	1.03077	0.8687	10	18.23	205.6	10	5395	0	0	0	1	0	0
410000	河南省	地级市	2012	漯河市	133	漯河	漯河2012	漯河市2012	9.57299	4.85173	6.8285			0	0	0	31.211	0.253	31.7361	5.21997	0.533194	1.13492	1.02984	10	19.22	206.94	8	6007	0	0	0	1	0	0
410000	河南省	地级市	2013	漯河市	133	漯河	漯河2013	漯河市2013	9.17498	3.57898	5.74876			0	0	0	31.443	0.302	34.9813	6.26607	0.746461	1.19704	1.18466	31	19.72	207.24	8	5022	0	0	0	1	0	0
410000	河南省	地级市	2014	漯河市	133	漯河	漯河2014	漯河市2014	26.0892	2.72881	8.69194			0	0	0	36.671	0.30947	38.7149	6.67941	0.82686	1.2472	1.30156	22	24.7	213.11	12	4890	0	0	0	1	0	0
410000	河南省	地级市	2015	漯河市	133	漯河	漯河2015	漯河市2015	28.3863	3.31815	10.0059			0	0	0	37.987	0.33181	41.389	6.87749	0.547585	1.36002	1.41699	30	26.34	215.59	12	5280	0	0	0	1	0	0
410000	河南省	地级市	2016	漯河市	133	漯河	漯河2016	漯河市2016	26.7248	3.38746	9.77992			0	0	0	41.138	0.33757	41.389	7.02331	0.653266	1.54657	1.56767	62	27.12	216.59	25	6902	0	0	0	1	0	0
410000	河南省	地级市	2017	漯河市	133	漯河	漯河2017	漯河市2017	18.4606	4.8602	9.57506			0	0	0	44.086	0.3612	50.681	7.09847	0.75574	1.55727	1.76061	59			45	7262	0	0	0	1	0	0
410000	河南省	地级市	2018	漯河市	133	漯河	漯河2018	漯河市2018	18.7213	7.4904	11.9156			0	0	0	46.53	0.3612	50.681	7.14479	2.53736	1.60065	1.96779	105	31.09	222.12	37	7102	0	0	0	1	0	0
410000	河南省	地级市	2019	漯河市	133	漯河	漯河2019	漯河市2019	20.0335	8.90546	13.4299			0	0	0	59.19	0.26889	61.411	6.07764	2.58815	1.37679	2.21436	79	45.04	236.37	29	9346	0	0	0	1	0	0
410000	河南省	地级市	2020	漯河市	133	漯河	漯河2020	漯河市2020	19.1266	10.5498	14.249			0	0	0	66.239	0.24362	63.931	6.39071	2.80487	1.602	2.43931	116	47.65	238.12	24	9348	0	0	0	1	0	0
140000	山西省	地级市	2006	吕梁市	134	吕梁	吕梁2006	吕梁市2006	4.22358	0.14192	0.769705			0	0	0	11.453	0.2748	16.7853	6.32755	0.172802	1.47862	0	3	27.72	222.86	17	6946	0	0	0	1	0	1
140000	山西省	地级市	2007	吕梁市	134	吕梁	吕梁2007	吕梁市2007	3.63858	0.24509	0.949067			0	0	0	14.241	0.2775	19.5817	7.55045	0.45057	1.47532	0	13	26.22	221.22	29	6879	0	0	0	1	0	1
140000	山西省	地级市	2008	吕梁市	134	吕梁	吕梁2008	吕梁市2008	11.3528	0.30386	1.8947			0	0	0	17.553	0.3248	20.625	8.75209	0.563949	1.55729	0	5	24.97	220.75	28	6562	0	0	0	1	0	1
140000	山西省	地级市	2009	吕梁市	134	吕梁	吕梁2009	吕梁市2009	11.2818	0.24868	1.70971			0	0	0	16.903	0.2889	26.2032	9.76512	0.514892	1.92948	0	13	30.14	223.97	23	7130	0	0	0	1	0	1
[truncated: 2,231 more rows]
